# Supplementary material for: mRNA-seq Analysis of the Gossypium arboreum transcriptome Reveals Tissue Selective Signaling in Response to Water Stress during Seedling Stage
Source: PLoS One. 2013 Jan 28;8(1):e54762. doi: 10.1371/journal.pone.0054762 (PMC3557298; doi:10.1371/journal.pone.0054762)
Supplement: Table S2 — In cotton tissues, 36,961 transcripts responded to PEG and NaCl treatments. Including the transcript length, raw RPKM data, log2 ratio, FDR-value, change call, and additional annotation of each transcript (XLS) [file pone.0054762.s006.xls]

## Sheet: changed unigenes table
		RPKM									Leaf PEG vs Leaf Mock			Leaf NaCl vs Leaf Mock			Stem PEG vs Stem Mock			Stem NaCl vs Stem Mock			Root PEG vs Root Mock			Root NaCl vs Root Mock
Unigene ID	Unigene Length	Leaf Mock	Leaf PEG	Leaf NaCl	Stem Mock	Stem PEG	Stem NaCl	Root Mock	Root PEG	Root NaCl	log2 ratio	FDR	Change call	log2 ratio	FDR	Change call	log2 ratio	FDR	Change call	log2 ratio	FDR	Change call	log2 ratio	FDR	Change call	log2 ratio	FDR	Change call	Annotation	TIAR9 hit	Cotton EST hit	Transcriprion factor family	KO pathway	GO term	Transcript direction
Unigene10_All	4154	1.3225	3.513	2.0895	2.914	3.1169	2.6637	5.2316	6.1879	5.831	1.4094	1.2778e-18	Up	0.6599	0.001164		0.0971	0.5981		-0.1296	0.50169		0.2422	0.014983		0.1565	0.13641		Unigene10_All//gi|124359633|gb|ABD32307.2|//0.00E+00//Nuclear factor related to kappa-B-binding protein , related [Medicago truncatula]	Unigene10_All//0.00E+00//AT3G45830| unknown protein	Unigene10_All//0.00E+00//ES821330				nr -
Unigene1000_All	2008	87.2622	13.5758	26.5985	63.8803	44.1759	35.3795	8.1907	0.9991	2.8371	-2.6843	0	Down	-1.714	1.7511e-280	Down	-0.5321	7.1263e-38		-0.8525	9.1608e-77		-3.0353	4.4919e-67	Down	-1.5296	1.0082e-29	Down	Unigene1000_All//gi|20196907|gb|AAB67625.2|//1.00E-139//expressed protein [Arabidopsis thaliana]	Unigene1000_All//3.00E-141//AT1G29050| unknown protein	Unigene1000_All//0.00E+00//TC170634				nr -
Unigene100003_All	343	0	0.5909	0	1.5975	1.6063	0.5267	1.849	0	0	9.2068	0.13761		null	null		0.0079	0.98278		-1.6008	0.13245		-10.8525	0.00012355	Down	-10.8525	7.1256e-05	Down			Unigene100003_All//7.00E-15//CO112306
Unigene100006_All	344	0	1.7675	0.9288	0	9.0092	0	0	0	0	10.7875	0.001171		9.8592	0.045422		13.1372	1.4053e-19	Up	null	null		null	null		null	null
Unigene100007_All	345	0	0.5875	0.1543	0	1.7966	0	0	0.1211	0.2309	9.1984	0.1376		7.2696	0.64329		10.8111	0.00079036	Up	null	null		6.9201	0.64126		7.8511	0.40698
Unigene10002_All	315	0	0	2.5357	0.4744	0.4373	2.1506	0.2684	0.2654	0.2529	null	null		11.3082	0.00017249	Up	-0.1175	0.91188		2.1806	0.031455		-0.0162	1.0168		-0.0858	0.97451		Unigene10002_All//gi|297817888|ref|XP_002876827.1|//3.00E-12//pentatricopeptide repeat-containing protein [Arabidopsis lyrata subsp. lyrata] >gi|297322665|gb|EFH53086.1| pentatricopeptide repeat-containing protein [Arabidopsis lyrata subsp. lyrata]	Unigene10002_All//2.00E-12//AT2G02750| pentatricopeptide (PPR) repeat-containing protein					nr +
Unigene100031_All	352	0.1486	0.1439	0.6051	3.1134	0.9783	0.2566	1.9218	0.475	0.6791	-0.0464	0.9881		2.0257	0.36216		-1.6701	0.0093832		-3.6009	5.0254e-05	Down	-2.0165	0.019843		-1.5008	0.054427		Unigene100031_All//gi|297598339|ref|NP_001045426.2|//6.00E-11//Os01g0953100 [Oryza sativa Japonica Group] >gi|255674080|dbj|BAF07340.2| Os01g0953100 [Oryza sativa Japonica Group]	Unigene100031_All//4.00E-13//AT5G45480| unknown protein					nr -
Unigene100049_All	362	0.5781	1.6797	0.8826	1.6513	5.2319	6.9866	0	0.3464	0.3302	1.5388	0.122		0.6104	0.62496		1.6637	0.00064951	Up	2.081	2.8737e-06	Up	8.4363	0.24133		8.3672	0.24387				Unigene100049_All//2.00E-117//EX165874				ESTscan +
Unigene10005_All	326	0	4.8183	3.4302	0	0	0	0	0	0	12.2343	5.7065e-09	Up	11.7441	3.4368e-06	Up	null	null		null	null		null	null		null	null		Unigene10005_All//gi|226462414|gb|EEH59706.1|//5.00E-07//predicted protein [Micromonas pusilla CCMP1545]						nr -
Unigene100054_All	366	0	0	0	0	19.5698	0	0	0	0	null	null		null	null		14.2563	4.0549e-46	Up	null	null		null	null		null	null				Unigene100054_All//1.00E-176//TC177439
Unigene100057_All	368	0.1422	0.1377	0.5788	0.6768	1.8715	0.6136	1.9532	0.1136	0.2165	-0.0464	0.98809		2.0251	0.36216		1.4674	0.11567		-0.1414	0.92942		-4.1038	0.00029155	Down	-3.1734	0.00080951	Down			Unigene100057_All//5.00E-13//TC176573				ESTscan +
Unigene100060_All	369	1.8433	0	1.1545	0.27	2.0531	0.612	0.4583	0.4531	0.5398	-10.8481	0.00041005	Down	-0.675	0.44128		2.9268	0.0043663		1.1806	0.55043		-0.0165	1.0222		0.2361	0.88408		Unigene100060_All//gi|8778340|gb|AAF79348.1|AC007887_7//2.00E-11//F15O4.13 [Arabidopsis thaliana]						nr +
Unigene100062_All	370	0.2828	0.2739	0	0.2693	2.9782	0.9765	0	0	0	-0.0461	0.99143		-8.1436	0.40041		3.4672	6.9602e-05	Up	1.8584	0.21987		null	null		null	null		Unigene100062_All//gi|57282623|emb|CAE54309.1|//3.00E-66//peroxidase [Gossypium hirsutum]	Unigene100062_All//9.00E-37//AT4G25980| cationic peroxidase, putative	Unigene100062_All//0.00E+00//gi|21093393|gb|BQ405706.1|BQ405706		ko00940|Phenylpropanoid biosynthesis//ko00360|Phenylalanine metabolism		nr +
Unigene100069_All	375	0.8371	0	0	0.1328	1.1938	2.2883	0.6765	0.3344	0	-9.7093	0.036695		-9.7093	0.049359		3.1682	0.039546		4.1069	0.00034057	Up	-1.0165	0.49557		-9.4019	0.030599								ESTscan -
Unigene100076_All	381	0.2747	2.6598	1.1181	0.2615	0.9038	0.7112	0.7768	0.2194	0	3.2754	0.00037898	Up	2.0251	0.13961		1.7892	0.25777		1.4434	0.40994		-1.824	0.21126		-9.6014	0.015891		Unigene100076_All//gi|75213194|sp|Q9SX85.1|SEC3A_ARATH//3.00E-32//RecName: Full=Exocyst complex component SEC3A >gi|5668806|gb|AAD46032.1|AC007519_17 Strong similarity to F16N3.17 from Arabidopsis thalian BAC gb|AC007519 [Arabidopsis thaliana]	Unigene100076_All//1.00E-33//AT1G47550| unknown protein	Unigene100076_All//0.00E+00//ES798551				nr +
Unigene100077_All	381	3.0212	1.5959	0	1.046	1.5365	1.1854	0	0	0	-0.9208	0.14345		-11.5609	2.6009e-06	Down	0.5548	0.5995		0.1805	0.88379		null	null		null	null		Unigene100077_All//gi|3513745|gb|AAC33961.1|//2.00E-08//contains similarity to reverse trancriptase (Pfam: rvt.hmm, score: 42.57) [Arabidopsis thaliana]	Unigene100077_All//1.00E-07//AT4G29090| reverse transcriptase, putative / RNA-dependent DNA polymerase, putative	Unigene100077_All//1.00E-25//gi|164240898|gb|ES823879.1|ES823879				nr +
Unigene100078_All	381	0	0.133	0.4193	0.523	3.1633	1.1854	0	0.1097	0.6274	7.0553	0.62409		8.7118	0.2403		2.5965	0.00034096	Up	1.1805	0.3381		6.7774	0.64124		9.2932	0.044064		Unigene100078_All//gi|297826769|ref|XP_002881267.1|//1.00E-40//TMS membrane family protein [Arabidopsis lyrata subsp. lyrata] >gi|297327106|gb|EFH57526.1| TMS membrane family protein [Arabidopsis lyrata subsp. lyrata]	Unigene100078_All//2.00E-41//AT2G33205| FUNCTIONS IN: molecular_function unknown; INVOLVED IN: biological_process unknown; LOCATED IN: membrane; CONTAINS InterPro DOMAIN/s: TMS membrane protein/tumour differentially expressed protein (InterPro:IPR005016); BEST Arabidopsis thaliana protein match is: MEE55 (maternal effect embryo arrest 55) (TAIR:AT4G13345.1); Has 602 Blast hits to 593 proteins in …	Unigene100078_All//1.00E-72//TC144118				nr +
Unigene100081_All	383	1.2295	1.0584	0.5561	0.1301	1.978	1.0613	0	0	0	-0.2162	0.81723		-1.1447	0.33235		3.9263	0.0009787	Up	3.0281	0.060354		null	null		null	null		Unigene100081_All//sp|P16679|PHNL_ECOLI//6.00E-14//Phosphonates transport ATP-binding protein phnL OS=Escherichia coli (strain K12) GN=phnL PE=1 SV=1	Unigene100081_All//5.00E-05//AT5G61730| ATATH11; ATPase, coupled to transmembrane movement of substances / transporter					swissprot -
Unigene100083_All	384	0	0.2639	0	0	2.2419	0	0	0	0	8.0438	0.39184		null	null		11.1305	2.7573e-05	Up	null	null		null	null		null	null		Unigene100083_All//gi|115438943|ref|NP_001043751.1|//2.00E-24//Os01g0655400 [Oryza sativa Japonica Group] >gi|55773937|dbj|BAD72325.1| eukaryotic translation initiation factor 3 subunit 10-like [Oryza sativa Japonica Group] >gi|113533282|dbj|BAF05665.1| Os01g0655400 [Oryza sativa Japonica Group]				ko03040|Spliceosome		nr -
Unigene100086_All	385	1.9026	0	2.4896	2.1996	3.4882	1.2904	0.7687	0.4342	0.8278	-10.8938	0.0002112	Down	0.3879	0.608		0.6652	0.28099		-0.7694	0.33426		-0.8241	0.54082		0.1069	0.94566		Unigene100086_All//gi|30684737|ref|NP_196912.2|//1.00E-32//pentatricopeptide (PPR) repeat-containing protein [Arabidopsis thaliana] >gi|223635762|sp|Q9FMU2.2|PP380_ARATH RecName: Full=Pentatricopeptide repeat-containing protein At5g14080	Unigene100086_All//6.00E-27//AT5G14080| pentatricopeptide (PPR) repeat-containing protein					nr -
Unigene100089_All	385	0	0.5264	0	0	13.2375	0	0	0	0	9.04	0.13759		null	null		13.6923	1.3633e-32	Up	null	null		null	null		null	null		Unigene100089_All//gi|116309014|emb|CAH66131.1|//4.00E-11//OSIGBa0135L04.5 [Oryza sativa (indica cultivar-group)]	Unigene100089_All//2.00E-06//AT3G09510| nucleic acid binding	Unigene100089_All//2.00E-163//TC177439				nr +
Unigene10009_All	669	0	1.5148	0.2388	0.0745	0.6177	0.2025	0.7584	0.9371	2.1438	10.5649	7.2643e-06	Up	7.8997	0.24029		3.0516	0.056783		1.4426	0.64066		0.3052	0.70388		1.4991	0.0029682				Unigene10009_All//8.00E-07//GE653373
Unigene100108_All	395	0.3974	0.5131	0.4044	0.1261	2.1794	0	0.107	0.4232	0	0.3686	0.81715		0.0252	1.0031		4.1113	0.0002605	Up	-6.9784	0.64745		1.9837	0.37999		-6.7415	0.62131
Unigene10011_All	387	0	0	0.1376	0	0.178	0.2334	2.2943	1.512	0.1029	null	null		7.1043	0.64327		7.4757	0.6177		7.8667	0.48401		-0.6016	0.38483		-4.4787	1.235e-05	Down	Unigene10011_All//gi|255590973|ref|XP_002535407.1|//1.00E-11//conserved hypothetical protein [Ricinus communis] >gi|223523200|gb|EEF26976.1| conserved hypothetical protein [Ricinus communis]	Unigene10011_All//2.00E-06//AT5G53840| F-box family protein (FBL13)					nr +
Unigene100114_All	399	0.5245	0.127	1.0677	0.1248	1.8987	0.2264	0.3179	0.3143	0.1997	-2.0461	0.33409		1.0255	0.39677		3.9273	0.00097861	Up	0.8593	0.79798		-0.0164	1.0199		-0.6707	0.72133				Unigene100114_All//5.00E-07//ES811668
Unigene100117_All	401	0	0.6318	0	0	2.1468	0.6758	0	0.3127	0.0993	9.3033	0.078945		null	null		11.068	2.7569e-05	Up	9.4005	0.070699		8.2886	0.24133		6.6337	0.65111
Unigene100122_All	406	0	0.9984	0.9181	0	17.1328	0	0	0	0	9.9635	0.01362		9.8425	0.025056		14.0645	9.1515e-45	Up	null	null		null	null		null	null
Unigene100125_All	408	0	0.4968	0	2.1977	3.0384	0	0.4145	0	0.0976	8.9565	0.13759		null	null		0.4673	0.49202		-11.1018	1.2104e-05	Down	-8.6952	0.13542		-2.0864	0.31439		Unigene100125_All//gi|195621986|gb|ACG32823.1|//6.00E-24//BRASSINOSTEROID INSENSITIVE 1-associated receptor kinase 1 precursor [Zea mays]	Unigene100125_All//3.00E-19//AT3G26700| protein kinase family protein	Unigene100125_All//0.00E+00//CO071070		ko04626|Plant-pathogen interaction//ko00270|Cysteine and methionine metabolism		nr -
Unigene100132_All	420	0.9966	0.6032	0.7607	0.4744	3.8535	0.1075	0.302	0.199	0	-0.7244	0.52576		-0.3897	0.71751		3.022	2.6293e-06	Up	-2.1418	0.34779		-0.6018	0.76814		-8.2384	0.20111		Unigene100132_All//gi|295815790|gb|ADG36380.1|//4.00E-22//promoter-binding protein SPL9 [Vitis vinifera]		Unigene100132_All//1.00E-171//gi|78343657|gb|DT563931.1|DT563931				nr +
Unigene10014_All	680	0.1539	0	0.1566	0.1465	0.4051	0	3.0467	0.6761	1.4647	-7.2658	0.37831		0.0251	1.0024		1.4674	0.42033		-7.1948	0.40625		-2.1719	1.9616e-06	Down	-1.0566	0.0064845		Unigene10014_All//gi|9739011|gb|AAF97863.1|//5.00E-68//outward-rectifying potassium channel KCO1 [Eucalyptus camaldulensis]	Unigene10014_All//7.00E-66//AT5G55630| ATKCO1; calcium-activated potassium channel/ ion channel/ outward rectifier potassium channel	Unigene10014_All//1.00E-138//TC135368			GO:0005227//GO:0005249//GO:0006875//GO:0009845//GO:0010118//GO:0030001//GO:0031090//GO:0031224//GO:0046872//GO:0051259	nr -
Unigene100141_All	438	1.1945	0.2314	0.2432	0.6824	2.2013	2.8872	0	1.3359	0.1819	-2.3679	0.047577		-2.2962	0.067682		1.6897	0.025183		2.081	0.0019578		10.3836	0.0002815	Up	7.507	0.40696		Unigene100141_All//gi|225458882|ref|XP_002283431.1|//3.00E-09//PREDICTED: hypothetical protein [Vitis vinifera] >gi|302142175|emb|CBI19378.3| unnamed protein product [Vitis vinifera]		Unigene100141_All//0.00E+00//DW512687				nr -
Unigene100147_All	444	0.4714	0.1141	0	1.9073	1.2409	0.1017	0.5714	1.2237	0.2692	-2.0467	0.33408		-8.8808	0.14686		-0.6201	0.41324		-4.2291	0.00021783	Down	1.0987	0.23597		-1.0858	0.42876				Unigene100147_All//5.00E-07//DW519735
Unigene100149_All	446	0	0	0	0	3.0112	0.5063	0	0	0	null	null		null	null		11.5561	2.6716e-08	Up	8.9838	0.1193		null	null		null	null		Unigene100149_All//gi|4001781|gb|AAC94980.1|//5.00E-62//cytochrome C oxidase subunit I [Ectocarpus sp.]	Unigene100149_All//6.00E-46//ATMG01360| cytochrome c oxidase subunit 1	Unigene100149_All//2.00E-12//TC149581		ko00190|Oxidative phosphorylation		nr -
Unigene10015_All	336	0	7.8417	2.6942	0	0	0	0	0	0	12.937	5.449e-15	Up	11.3956	4.7154e-05	Up	null	null		null	null		null	null		null	null		Unigene10015_All//gi|300175133|emb|CBK20444.2|//3.00E-07//Pyruvate Dehydrogenase E1 (subunit ?) [Blastocystis hominis]	Unigene10015_All//5.00E-05//AT5G50850| MAB1 (MACCI-BOU); catalytic/ pyruvate dehydrogenase (acetyl-transferring)			ko00010|Glycolysis / Gluconeogenesis//ko00620|Pyruvate metabolism//ko00020|Citrate cycle (TCA cycle)//ko00650|Butanoate metabolism//ko00290|Valine, leucine and isoleucine biosynthesis		nr -
Unigene100150_All	446	0	0	0	0	3.7832	0.9114	0	0	0	null	null		null	null		11.8854	1.7577e-10	Up	9.8319	0.013653		null	null		null	null		Unigene100150_All//gi|260766526|gb|ACX50285.1|//1.00E-32//cytochrome oxidase subunit 1 [Guillardia theta]	Unigene100150_All//4.00E-29//ATMG01360| cytochrome c oxidase subunit 1			ko00190|Oxidative phosphorylation		nr -
Unigene10016_All	468	0	14.8327	3.5272	0	0.1472	0	0	0	0	13.8565	1.1462e-39	Up	11.7843	4.307e-09	Up	7.2016	0.61769		null	null		null	null		null	null								ESTscan -
Unigene100162_All	481	0	0	0	0.2071	1.8614	0.7512	0	0	0	null	null		null	null		3.168	0.00087787	Up	1.8589	0.21985		null	null		null	null
Unigene100163_All	483	0.1083	0	0.3307	1.2376	1.0694	0	0.8754	0	0	-6.7589	0.62373		1.6105	0.51204		-0.2107	0.82268		-10.2733	0.00077086	Down	-9.7738	0.0032619		-9.7738	0.0021515		Unigene100163_All//gi|54606737|dbj|BAD66760.1|//6.00E-06//orf120b [Beta vulgaris subsp. vulgaris] >gi|54606775|dbj|BAD66798.1| orf120b [Beta vulgaris subsp. vulgaris]		Unigene100163_All//8.00E-37//TC141826				nr +
Unigene100172_All	544	1.1541	0.7451	0.5873	2.564	3.8613	1.4944	1.6321	0.7683	0.2197	-0.6313	0.47536		-0.9746	0.31609		0.5907	0.20162		-0.7788	0.18176		-1.087	0.10671		-2.8931	0.00030456	Down	Unigene100172_All//gi|297799972|ref|XP_002867870.1|//3.00E-49//male sterility MS5 [Arabidopsis lyrata subsp. lyrata] >gi|297313706|gb|EFH44129.1| male sterility MS5 [Arabidopsis lyrata subsp. lyrata]	Unigene100172_All//6.00E-46//AT4G20900| MS5 (MALE-STERILE 5)					nr -
Unigene100173_All	559	0	0.7251	0	0	3.0801	0.7271	0	0	0	9.502	0.01362		null	null		11.5888	1.0581e-10	Up	9.506	0.013652		null	null		null	null		Unigene100173_All//gi|225703022|dbj|BAH30233.1|//5.00E-46//cytochrome c oxidase subunit II [Haptoglossa sp. SZ03]	Unigene100173_All//5.00E-23//ATMG00160| cytochrome c oxidase subunit 2			ko00190|Oxidative phosphorylation		nr +
Unigene100175_All	591	0.0885	0.5144	0	0	2.5637	0	0	0	0	2.5391	0.15113		-6.4676	0.63659		11.324	2.1766e-09	Up	null	null		null	null		null	null		Unigene100175_All//gi|297841083|ref|XP_002888423.1|//8.00E-70//xanthine/uracil permease family protein [Arabidopsis lyrata subsp. lyrata] >gi|297334264|gb|EFH64682.1| xanthine/uracil permease family protein [Arabidopsis lyrata subsp. lyrata]	Unigene100175_All//5.00E-59//AT1G65550| xanthine/uracil permease family protein	Unigene100175_All//5.00E-11//TC129603				nr -
Unigene100176_All	602	1.3037	0	0.1769	5.0476	2.0021	0.2251	0.7023	0.0694	0.1324	-10.3484	0.0001088	Down	-2.8816	0.0063518		-1.3341	8.473e-05	Down	-4.487	2.3188e-15	Down	-3.3391	0.018036		-2.4072	0.039416		Unigene100176_All//gi|238909261|gb|ACR77749.1|//9.00E-77//12-oxophytodienoic acid 10,10-reductase [Astragalus sinicus]	Unigene100176_All//9.00E-75//AT1G76680| OPR1; 12-oxophytodienoate reductase	Unigene100176_All//5.00E-17//AI725636		ko00592|alpha-Linolenic acid metabolism		nr -
Unigene100180_All	665	0	0	0	0	2.7445	0.5433	0	0	0	null	null		null	null		11.4223	2.3261e-11	Up	9.0856	0.023801		null	null		null	null		Unigene100180_All//gi|226347397|gb|ACO50109.1|//1.00E-76//elongation factor 1 alpha [Euglena longa]	Unigene100180_All//2.00E-62//AT5G60390| elongation factor 1-alpha / EF-1-alpha	Unigene100180_All//3.00E-12//TC143701				nr +
Unigene100181_All	784	0	0	0	0	2.9867	0.6913	0	0	0	null	null		null	null		11.5443	1.1154e-14	Up	9.4332	0.0024579		null	null		null	null		Unigene100181_All//gi|49147195|ref|YP_025788.1|//2.00E-23//ATP synthase F0 subunit 6 [Pseudendoclonium akinetum] >gi|33439210|gb|AAQ18747.1| ATP synthase F0 subunit 6 [Pseudendoclonium akinetum]	Unigene100181_All//2.00E-08//ATMG00410| ATPase subunit 6			ko00190|Oxidative phosphorylation		nr -
Unigene100182_All	447	0.117	0.1134	0	0.2229	0.1541	0.3031	1.3242	0.0935	0	-0.0451	0.98808		-6.8704	0.63658		-0.5325	0.82028		0.4434	0.86347		-3.824	0.0017863		-10.3709	0.00014167	Down			Unigene100182_All//8.00E-114//ES830419
Unigene100186_All	292	4.3003	3.8176	10.7594	7.6768	4.8351	8.3521	3.3303	1.5745	2.3194	-0.1718	0.75467		1.3231	0.00045267	Up	-0.667	0.10755		0.1216	0.78052		-1.0808	0.088802		-0.5219	0.38882		Unigene100186_All//gi|213990447|gb|ACJ60637.1|//2.00E-11//glutaredoxin S12 [Populus tremula x Populus tremuloides]	Unigene100186_All//6.00E-11//AT4G28730| glutaredoxin family protein	Unigene100186_All//2.00E-119//BG445794				nr +
Unigene100191_All	491	0.4262	0	0.3254	0.4058	0.4909	0.3679	1.1194	0	0.4057	-8.7354	0.1228		-0.3893	0.80797		0.2747	0.89554		-0.1415	0.93583		-10.1285	0.000462	Down	-1.4642	0.097666		Unigene100191_All//gi|75146761|sp|Q84K11.1|PPP5_SOLLC//2.00E-55//RecName: Full=Serine/threonine-protein phosphatase 5; AltName: Full=LePP5 >gi|28141004|gb|AAO26213.1| type 5 protein serine/threonine phosphatase 62 kDa isoform [Solanum lycopersicum] >gi|28141085|gb|AAO26215.1| type 5 protein serine/threonine phosphatase 62 kDa isoform [Solanum lycopersicum]	Unigene100191_All//5.00E-47//AT2G42810| PP5.2 (PROTEIN PHOSPHATASE 5.2); phosphoprotein phosphatase/ protein binding / protein serine/threonine phosphatase	Unigene100191_All//2.00E-167//CO074097				nr +
Unigene100195_All	374	4.6165	0	2.7052	3.1966	3.2226	4.5888	0.4522	0.5588	0.4261	-12.1726	5.3394e-10	Down	-0.7711	0.13987		0.0117	0.99904		0.5216	0.33427		0.3054	0.83693		-0.0858	0.96664				Unigene100195_All//3.00E-85//BF275481
Unigene100196_All	376	3.4788	3.7733	3.2573	1.0599	2.5643	2.5224	1.012	4.4464	1.1655	0.1172	0.82428		-0.0949	0.8718		1.2746	0.084328		1.2509	0.096009		2.1354	3.2169e-05	Up	0.2037	0.82643				Unigene100196_All//3.00E-131//TC172967
Unigene100224_All	206	3.8098	0	1.034	0.4836	1.8388	3.5078	1.8472	0.8116	0.1934	-11.8955	0.0001088	Down	-1.8815	0.04131		1.9269	0.19415		2.8587	0.0071266		-1.1865	0.30967		-3.2557	0.022239
Unigene10024_All	305	0	0.9968	1.7459	0	0.1129	0	0.5545	3.0148	3.3961	9.9612	0.044506		10.7698	0.0040491		6.8189	0.84291		null	null		2.4428	0.001327		2.6146	0.00023744	Up
Unigene10025_All	446	0	0	0	0	0	0	2.2752	2.4365	0	null	null		null	null		null	null		null	null		0.0988	0.871		-11.1518	1.3529e-07	Down	Unigene10025_All//gi|195606812|gb|ACG25236.1|//1.00E-66//60S ribosomal protein L3 [Zea mays] >gi|195619674|gb|ACG31667.1| 60S ribosomal protein L3 [Zea mays] >gi|195626206|gb|ACG34933.1| 60S ribosomal protein L3 [Zea mays] >gi|195641988|gb|ACG40462.1| 60S ribosomal protein L3 [Zea mays]	Unigene10025_All//3.00E-60//AT1G43170| ARP1 (ARABIDOPSIS RIBOSOMAL PROTEIN 1); structural constituent of ribosome	Unigene10025_All//6.00E-13//TC135599		ko03010|Ribosome	GO:0005198//GO:0010467//GO:0015934	nr -
Unigene10028_All	568	0	0	0	0.4385	0.5456	0.3181	2.903	1.4717	0.3507	null	null		null	null		0.3153	0.83857		-0.4631	0.74507		-0.9801	0.03315		-3.0492	1.309e-07	Down	Unigene10028_All//gi|32400679|gb|AAP80589.1|AF277102_1//1.00E-07//protease [Gossypium hirsutum]					GO:0003676//GO:0006259//GO:0008233	nr -
Unigene1003_All	1089	4.1319	3.9084	4.5964	11.39	9.9606	10.2022	24.809	20.1111	8.9262	-0.0802	0.77921		0.1537	0.62771		-0.1935	0.27833		-0.1589	0.39324		-0.3029	0.0013639		-1.4747	9.089e-46	Down	Unigene1003_All//gi|115441759|ref|NP_001045159.1|//2.00E-62//Os01g0911200 [Oryza sativa Japonica Group] >gi|113534690|dbj|BAF07073.1| Os01g0911200 [Oryza sativa Japonica Group]	Unigene1003_All//1.00E-54//AT4G21150| HAP6 (HAPLESS 6); dolichyl-diphosphooligosaccharide-protein glycotransferase	Unigene1003_All//0.00E+00//TC136242		ko04141|Protein processing in endoplasmic reticulum//ko00510|N-Glycan biosynthesis	GO:0004576//GO:0005618//GO:0005789//GO:0006487//GO:0006950//GO:0031410	nr +
Unigene100305_All	321	2.1189	4.4198	6.3037	2.483	4.5056	3.7988	1.0537	4.8176	4.0956	1.0607	0.061447		1.5729	0.0016376		0.8596	0.13126		0.6135	0.35165		2.1929	5.1069e-05	Up	1.9586	0.00050385	Up	Unigene100305_All//gi|30684602|ref|NP_850606.1|//2.00E-07//ATRBL14 (ARABIDOPSIS RHOMBOID-LIKE PROTEIN 14); zinc ion binding [Arabidopsis thaliana] >gi|75247670|sp|Q8RXW0.1|Y3761_ARATH RecName: Full=Uncharacterized protein At3g17611	Unigene100305_All//3.00E-12//AT3G17611| ATRBL14 (ARABIDOPSIS RHOMBOID-LIKE PROTEIN 14); zinc ion binding	Unigene100305_All//2.00E-116//gi|78346546|gb|DT566820.1|DT566820				nr -
Unigene10031_All	443	0	15.5554	7.2122	0	0	0	0	0	0	13.9251	2.2476e-39	Up	12.8162	1.1509e-17	Up	null	null		null	null		null	null		null	null
Unigene10032_All	274	13.7485	4.993	9.3285	15.9987	23.5015	19.7796	96.5963	86.7948	79.9681	-1.4613	1.1562e-05	Down	-0.5596	0.092924		0.5548	0.014476		0.3061	0.28064		-0.1544	0.13865		-0.2725	0.0035909				Unigene10032_All//2.00E-73//gi|48775848|gb|CO085214.1|CO085214
Unigene100336_All	397	2.7676	0.1276	0.9389	1.3802	0.347	0.455	0.1065	0	0	-4.4389	2.0856e-05	Down	-1.5596	0.030497		-1.9919	0.051256		-1.6009	0.13245		-6.7347	0.66773		-6.7347	0.62115		Unigene100336_All//gi|50512303|gb|AAT77550.1|//1.00E-21//9DC3 [Solanum pimpinellifolium]	Unigene100336_All//7.00E-07//AT3G53240| AtRLP45 (Receptor Like Protein 45); protein binding	Unigene100336_All//7.00E-09//gi|78354692|gb|DT574966.1|DT574966				nr +
Unigene10034_All	519	0	0	0	0	0	0	3.3401	1.6106	0.1535	null	null		null	null		null	null		null	null		-1.0523	0.018675		-4.4436	1.9436e-10	Down	Unigene10034_All//gi|19908695|gb|AAM02970.1|AF421537_1//2.00E-86//beta-tubulin [Crypthecodinium cohnii]	Unigene10034_All//1.00E-70//AT1G75780| TUB1; GTP binding / GTPase/ structural molecule	Unigene10034_All//5.00E-32//TC141009		ko04145|Phagosome	GO:0007017//GO:0015630//GO:0017111//GO:0032561//GO:0032991//GO:0043623	nr +
Unigene100353_All	206	0	4.1815	0	0	0.6686	0.6577	0.6157	0.8116	0.5802	12.0298	4.9493e-05	Up	null	null		9.385	0.32075		9.3613	0.31374		0.3985	0.81524		-0.0857	0.97076
Unigene100355_All	246	2.9776	8.8569	8.6585	3.4424	2.6596	19.0935	386.709	542.495	1048.6	1.5727	0.00066142	Up	1.54	0.0014219		-0.3722	0.6057		2.4716	1.2544e-13	Up	0.4884	4.8215e-34		1.4391	0	Up	Unigene100355_All//gi|89258498|gb|ABD65462.1|//2.00E-26//short chain alcohol dehydrogenase [Gossypium hirsutum]	Unigene100355_All//2.00E-16//AT2G47140| short-chain dehydrogenase/reductase (SDR) family protein	Unigene100355_All//2.00E-122//ES831528		ko00906|Carotenoid biosynthesis		nr +
Unigene10038_All	634	0	0	0	0	0	0	1.4004	4.5487	1.2567	null	null		null	null		null	null		null	null		1.6996	1.8005e-06	Up	-0.1562	0.79364		Unigene10038_All//gi|15227189|ref|NP_182322.1|//3.00E-59//RKF3 (RECEPTOR-LIKE KINASE IN IN FLOWERS 3); kinase/ receptor signaling protein serine/threonine kinase [Arabidopsis thaliana] >gi|75319082|sp|P93050.1|RKF3_ARATH RecName: Full=Probable LRR receptor-like serine/threonine-protein kinase RKF3; AltName: Full=Receptor-like kinase in flowers 3; Flags: Precursor >gi|1785621|emb|CAB06335.1| AtPK2…	Unigene10038_All//6.00E-59//AT2G48010| RKF3 (RECEPTOR-LIKE KINASE IN IN FLOWERS 3); kinase/ receptor signaling protein serine/threonine kinase			ko04626|Plant-pathogen interaction//ko00270|Cysteine and methionine metabolism	GO:0004674//GO:0004713//GO:0004871//GO:0006464//GO:0016020//GO:0032559	nr -
Unigene1004_All	2373	6.5925	3.3523	5.5427	15.3242	13.4955	13.9316	26.4585	13.5444	9.8044	-0.9757	1.7196e-11		-0.2502	0.1075		-0.1833	0.044757		-0.1375	0.17358		-0.966	1.1046e-52		-1.4322	9.4528e-101	Down	Unigene1004_All//gi|297804040|ref|XP_002869904.1|//0.00E+00//ribophorin II family protein [Arabidopsis lyrata subsp. lyrata] >gi|297315740|gb|EFH46163.1| ribophorin II family protein [Arabidopsis lyrata subsp. lyrata]	Unigene1004_All//0.00E+00//AT4G21150| HAP6 (HAPLESS 6); dolichyl-diphosphooligosaccharide-protein glycotransferase	Unigene1004_All//0.00E+00//TC136242		ko04141|Protein processing in endoplasmic reticulum//ko00510|N-Glycan biosynthesis	GO:0004576//GO:0005618//GO:0005789//GO:0006487//GO:0006950//GO:0031410	nr +
Unigene10040_All	235	2.6717	10.9963	4.3053	2.5437	0.7327	0.7687	0.3598	0.3557	0.1695	2.0412	4.8142e-06	Up	0.6884	0.34244		-1.7956	0.05866		-1.7264	0.090406		-0.0165	1.0167		-1.0859	0.67861
Unigene10042_All	323	1.2959	0.6275	0.4946	3.3929	1.3859	0.2796	1.309	0.2588	0.2467	-1.0463	0.36588		-1.3896	0.28003		-1.2917	0.040676		-3.6011	5.0249e-05	Down	-2.3386	0.054715		-2.4076	0.039414		Unigene10042_All//gi|147823314|emb|CAN77450.1|//2.00E-19//hypothetical protein [Vitis vinifera]		Unigene10042_All//3.00E-14//ES792704				nr -
Unigene10043_All	524	0	8.7995	41.4618	0	0	3.4476	0	0	0	13.1032	2.8441e-26	Up	15.3395	7.3023e-123	Up	null	null		11.7514	8.9246e-11	Up	null	null		null	null		Unigene10043_All//gi|270383724|dbj|BAI53120.1|//3.00E-83//ribulose-1,5-bisphosphate carboxylase/oxygenase small subunit [Eucalyptus globulus]	Unigene10043_All//1.00E-81//AT5G38430| ribulose bisphosphate carboxylase small chain 1B / RuBisCO small subunit 1B (RBCS-1B) (ATS1B)	Unigene10043_All//1.00E-23//gi|48752358|gb|CO082877.1|CO082877		ko00710|Carbon fixation in photosynthetic organisms//ko00630|Glyoxylate and dicarboxylate metabolism	GO:0005576//GO:0005840//GO:0006950//GO:0009526//GO:0009532//GO:0009534//GO:0009639//GO:0015977//GO:0016491//GO:0016831//GO:0043094//GO:0044436//GO:0046914	nr -
Unigene10044_All	400	0	20.7745	12.1144	0	0	0	0	0	0	14.3425	1.5226e-47	Up	13.5644	6.1105e-27	Up	null	null		null	null		null	null		null	null		Unigene10044_All//gi|89513312|gb|ABD74515.1|//1.00E-40//ribosomal protein [Pteris vittata]	Unigene10044_All//2.00E-39//AT1G36240| 60S ribosomal protein L30 (RPL30A)			ko03010|Ribosome	GO:0005198//GO:0010467//GO:0030529	nr +
Unigene100446_All	343	22.8808	18.3178	11.0226	27.013	24.0947	28.9678	46.4712	20.9588	28.1077	-0.3209	0.13574		-1.0537	1.5648e-06	Down	-0.1649	0.45056		0.1008	0.64333		-1.1488	2.7439e-18	Down	-0.7254	3.4216e-09		Unigene100446_All//gi|164564736|dbj|BAF98218.1|//7.00E-29//CM0216.350.nc [Lotus japonicus]	Unigene100446_All//1.00E-08//AT4G39200| 40S ribosomal protein S25 (RPS25E)	Unigene100446_All//7.00E-86//BF276543		ko03010|Ribosome		nr -
Unigene10047_All	390	0	3.7677	2.1846	0	0	0	0	0	0	11.8795	2.1124e-08	Up	11.0932	9.0367e-05	Up	null	null		null	null		null	null		null	null		Unigene10047_All//gi|224482651|gb|ACN50182.1|//5.00E-14//annexin [Annona cherimola]	Unigene10047_All//9.00E-10//AT1G68090| ANN5; calcium ion binding / calcium-dependent phospholipid binding					nr -
Unigene10048_All	592	0	4.0227	1.709	0	0	0	0	0	0	11.9739	1.499e-13	Up	10.7389	1.2751e-05	Up	null	null		null	null		null	null		null	null		Unigene10048_All//gi|300120616|emb|CBK20170.2|//4.00E-23//unnamed protein product [Blastocystis hominis]						nr +
Unigene10049_All	212	7.1571	0.956	1.7583	4.4645	4.3856	5.7519	0.1994	0.1971	0	-2.9043	2.066e-05	Down	-2.0252	0.0012286		-0.0257	0.95002		0.3655	0.60354		-0.0167	1.0083		-7.6395	0.62105				Unigene10049_All//2.00E-10//ES837561
Unigene1005_All	1493	17.2417	6.9912	18.9389	4.7712	7.7958	7.7743	1.6142	1.2318	0.8005	-1.3023	7.7163e-29	Down	0.1355	0.24643		0.7083	5.8555e-06		0.7044	1.5868e-05		-0.3901	0.31541		-1.0118	0.0043169		Unigene1005_All//gi|30678625|ref|NP_567175.2|//1.00E-137//ANTR2; inorganic phosphate transmembrane transporter/ organic anion transmembrane transporter [Arabidopsis thaliana] >gi|75244391|sp|Q8GX78.1|ANTR2_ARATH RecName: Full=Probable anion transporter 2, chloroplastic; AltName: Full=Phosphate transporter PHT4;4; Flags: Precursor >gi|32306495|gb|AAP78931.1| At4g00370 [Arabidopsis thaliana]	Unigene1005_All//7.00E-135//AT4G00370| ANTR2; inorganic phosphate transmembrane transporter/ organic anion transmembrane transporter	Unigene1005_All//0.00E+00//TC172647				nr -
Unigene10050_All	394	0	0.1286	0	0	0	0.3439	1.395	3.0763	4.9546	7.0067	0.62397		null	null		null	null		8.4258	0.3137		1.1409	0.040655		1.8285	3.5138e-05	Up	Unigene10050_All//gi|224097212|ref|XP_002310878.1|//5.00E-19//1-aminocyclopropane-1-carboxylate [Populus trichocarpa] >gi|222853781|gb|EEE91328.1| 1-aminocyclopropane-1-carboxylate [Populus trichocarpa]	Unigene10050_All//7.00E-18//AT5G65800| ACS5 (ACC SYNTHASE 5); 1-aminocyclopropane-1-carboxylate synthase			ko00270|Cysteine and methionine metabolism	GO:0005515//GO:0006412//GO:0006555//GO:0009725//GO:0016846	nr +
Unigene100500_All	896	0.4088	0	0.6537	0.6672	0.1537	2.3691	0.2831	0	0	-8.6753	0.019702		0.6772	0.48256		-2.118	0.030639		1.8281	0.00012565	Up	-8.1452	0.040657		-8.1452	0.030598		Unigene100500_All//gi|5453379|gb|AAD43561.1|AF155124_1//1.00E-125//bacterial-induced peroxidase precursor [Gossypium hirsutum]	Unigene100500_All//2.00E-83//AT5G05340| peroxidase, putative	Unigene100500_All//0.00E+00//NP385887		ko00940|Phenylpropanoid biosynthesis//ko00360|Phenylalanine metabolism	GO:0003824//GO:0005506//GO:0006950//GO:0008152//GO:0016209//GO:0031410	nr +
Unigene10051_All	479	0.5461	4.2313	2.1122	0.624	0.9346	0.66	0.3531	0.4363	1.3307	2.9539	4.8634e-07	Up	1.9515	0.01368		0.5828	0.62632		0.0809	0.95032		0.3052	0.8369		1.914	0.026041
Unigene100521_All	242	0	0	0	0	0	0.5599	0	0	3.6217	null	null		null	null		null	null		9.129	0.31368		null	null		11.8225	2.0529e-06	Up
Unigene10053_All	497	0	0	0.4286	0	0.6236	1.5448	0	0.2523	1.523	null	null		8.7435	0.14216		9.2845	0.045495		10.5932	0.00012689	Up	7.979	0.24132		10.5727	1.3918e-05	Up	Unigene10053_All//gi|66792688|gb|AAY56446.1|//5.00E-39//At1g63930 [Arabidopsis thaliana] >gi|115311479|gb|ABI93920.1| At1g63930 [Arabidopsis thaliana]	Unigene10053_All//9.00E-37//AT1G63930| unknown protein	Unigene10053_All//4.00E-113//TC174086				nr +
Unigene10057_All	358	32.2986	27.5993	34.2109	25.6028	27.5098	40.748	17.8333	13.6595	3.2272	-0.2268	0.20495		0.083	0.63609		0.1036	0.62856		0.6704	2.8996e-06		-0.3847	0.074538		-2.4662	5.4113e-22	Down
Unigene10058_All	372	9.1421	1.4983	2.2903	4.5529	2.6845	1.5783	0	0	0	-2.6092	3.4617e-10	Down	-1.997	3.4843e-07	Down	-0.7621	0.11791		-1.5284	0.0033351		null	null		null	null		Unigene10058_All//gi|73761705|gb|AAZ83352.1|//1.00E-21//myb transcription factor MYB30 [Gossypium hirsutum]		Unigene10058_All//1.00E-19//TC145072			GO:0009725//GO:0009987	nr +
Unigene10059_All	446	0	0	0	0	0	0	3.6023	0.5623	1.2505	null	null		null	null		null	null		null	null		-2.6795	2.3805e-06	Down	-1.5264	0.0011578								ESTscan -
Unigene100616_All	511	3.3788	0.5949	2.3968	2.0472	1.9543	0.4419	0.6619	0.1636	2.105	-2.5058	2.6566e-05	Down	-0.4954	0.35808		-0.067	0.90615		-2.2119	0.0032548		-2.0164	0.13679		1.6691	0.0061582		Unigene100616_All//gi|115452803|ref|NP_001050002.1|//1.00E-14//Os03g0328900 [Oryza sativa Japonica Group] >gi|108707942|gb|ABF95737.1| Zinc finger C-x8-C-x5-C-x3-H type family protein, expressed [Oryza sativa (japonica cultivar-group)] >gi|113548473|dbj|BAF11916.1| Os03g0328900 [Oryza sativa Japonica Group]	Unigene100616_All//6.00E-14//AT3G51950| zinc finger (CCCH-type) family protein / RNA recognition motif (RRM)-containing protein		C3H		GO:0003676//GO:0046914	nr -
Unigene10062_All	329	0.159	0.308	0	2.7254	0.8373	1.51	7.0681	40.3983	7.6287	0.9539	0.72836		-7.3129	0.63642		-1.7027	0.019818		-0.8519	0.26309		2.5149	2.2194e-44	Up	0.1101	0.75534				Unigene10062_All//4.00E-07//TC158719
Unigene10065_All	297	0	4.4357	2.8687	0	0	0	0	0	0	12.1149	1.4964e-07	Up	11.4862	9.036e-05	Up	null	null		null	null		null	null		null	null								ESTscan -
Unigene10066_All	248	0	0	3.006	0.6026	1.3885	1.2748	1.0229	0.6741	0.1606	null	null		11.5536	0.00032795	Up	1.2043	0.42614		1.081	0.47626		-0.6016	0.64853		-2.6711	0.11531
Unigene10067_All	547	269.543	354.038	239.771	323.838	777.847	534.53	6.1836	18.6438	12.7454	0.3934	4.1066e-27		-0.1689	0.000143		1.2642	0	Up	0.723	3.297e-130		1.5922	3.526e-19	Up	1.0435	1.4783e-07	Up	Unigene10067_All//gi|194466223|gb|ACF74342.1|//4.00E-34//gonadotropin beta chain [Arachis hypogaea]	Unigene10067_All//2.00E-21//AT5G14920| gibberellin-regulated family protein	Unigene10067_All//0.00E+00//TC163273				nr +
Unigene10068_All	577	0	28.0131	7.383	0	0	0	0	0	0	14.7738	6.9657e-93	Up	12.85	1.22e-23	Up	null	null		null	null		null	null		null	null		Unigene10068_All//gi|116310923|emb|CAH67861.1|//1.00E-10//B0403H10-OSIGBa0105A11.13 [Oryza sativa (indica cultivar-group)]				ko00190|Oxidative phosphorylation//ko04145|Phagosome		nr +
Unigene10069_All	323	0	0	0	0	0	0	10.0792	11.7753	0.37	null	null		null	null		null	null		null	null		0.2244	0.47198		-4.7677	6.5223e-20	Down	Unigene10069_All//gi|297829770|ref|XP_002882767.1|//4.00E-52//actin-11 [Arabidopsis lyrata subsp. lyrata] >gi|297328607|gb|EFH59026.1| actin-11 [Arabidopsis lyrata subsp. lyrata]	Unigene10069_All//2.00E-53//AT3G12110| ACT11 (actin-11); structural constituent of cytoskeleton	Unigene10069_All//6.00E-40//TC153744		ko04145|Phagosome	GO:0007010//GO:0016020//GO:0032559//GO:0043231//GO:0043232	nr -
Unigene100697_All	211	0	0.9606	0	0.4722	0.4896	1.4983	0.4008	3.9617	0	9.9078	0.13758		null	null		0.0522	0.96888		1.6659	0.30934		3.3052	0.00030971	Up	-8.6467	0.36251
Unigene10070_All	624	0.0838	0	0	0.0798	0.1104	0.2171	0.1355	0	1.7876	-6.3889	0.62353		-6.3889	0.63636		0.4683	0.9627		1.4439	0.64059		-7.0821	0.40878		3.7217	4.3534e-06	Up	Unigene10070_All//gi|124359981|gb|ABN07997.1|//7.00E-09//contains similarity to reverse trancriptase , related [Medicago truncatula]	Unigene10070_All//6.00E-07//AT4G29090| reverse transcriptase, putative / RNA-dependent DNA polymerase, putative				GO:0005488	nr -
Unigene10071_All	379	0.2761	6.8183	4.3555	0.3943	0.3634	2.7408	3.7929	8.712	98.4929	4.6261	3.3415e-12	Up	3.9796	5.1644e-07	Up	-0.1177	0.91182		2.7972	0.00081274	Up	1.1997	0.00011448	Up	4.6986	8.2995e-217	Up			Unigene10071_All//3.00E-159//DT461826
Unigene100711_All	265	2.3692	4.0153	1.6075	0.376	0.6497	5.7945	0.7977	0	0.7517	0.7611	0.24842		-0.5596	0.55361		0.789	0.77203		3.9459	4.9018e-07	Up	-9.6397	0.074863		-0.0857	0.9615		Unigene100711_All//gi|225451804|ref|XP_002281338.1|//2.00E-09//PREDICTED: brassinosteroid-6-oxidase [Vitis vinifera]	Unigene100711_All//7.00E-07//AT5G38970| BR6OX1 (BRASSINOSTEROID-6-OXIDASE 1); monooxygenase/ oxygen binding	Unigene100711_All//3.00E-103//TC166913		ko00905|Brassinosteroid biosynthesis	GO:0000226//GO:0005506//GO:0006091//GO:0009646//GO:0016129//GO:0016491//GO:0031224//GO:0032501//GO:0048878	nr +
Unigene10072_All	595	0	0	0	0.5023	0	0	1.6344	0.4215	10.579	null	null		null	null		-8.9724	0.020201		-8.9724	0.040093		-1.9552	0.0044404		2.6944	1.6825e-23	Up			Unigene10072_All//0.00E+00//gi|109888809|gb|DW517778.1|DW517778
Unigene10074_All	962	0.5439	0.9481	1.1071	4.8675	4.1881	2.7699	0.7472	0.0434	0.3313	0.8017	0.27125		1.0254	0.14316		-0.2169	0.49053		-0.8133	0.0030748		-4.1057	0.00029153	Down	-1.1734	0.10912		Unigene10074_All//gi|39725413|emb|CAE09057.1|//2.00E-70//MYB transcription factor [Eucalyptus gunnii]	Unigene10074_All//4.00E-53//AT3G08500| MYB83 (myb domain protein 83); DNA binding / transcription factor	Unigene10074_All//1.00E-166//DW508945	MYB		GO:0001071//GO:0003676//GO:0006350//GO:0009832//GO:0010033//GO:0010468//GO:0043231	nr +
Unigene10075_All	585	0	9.7874	5.4615	0	0	0	0	0	0	13.2567	1.1325e-32	Up	12.4151	1.1506e-17	Up	null	null		null	null		null	null		null	null		Unigene10075_All//gi|159483465|ref|XP_001699781.1|//2.00E-51//eukaryotic initiation factor [Chlamydomonas reinhardtii] >gi|158281723|gb|EDP07477.1| eukaryotic initiation factor [Chlamydomonas reinhardtii]	Unigene10075_All//1.00E-36//AT2G04520| eukaryotic translation initiation factor 1A, putative / eIF-1A, putative / eIF-4C, putative				GO:0006412//GO:0008135	nr +
Unigene100750_All	499	0.1049	0	0.9604	0.9983	1.7252	1.1766	2.4572	0.7538	0.5589	-6.7129	0.62348		3.1946	0.034801		0.7892	0.32129		0.2371	0.79851		-1.7048	0.0033195		-2.1364	0.0003241	Down	Unigene100750_All//gi|240254302|ref|NP_176378.4|//3.00E-60//galactolipase/ phospholipase [Arabidopsis thaliana]	Unigene100750_All//2.00E-61//AT1G61850| galactolipase/ phospholipase	Unigene100750_All//6.00E-10//EV498230			GO:0003824//GO:0005488//GO:0044238	nr -
Unigene10076_All	406	0	0	0	0	0	0.2225	4.5821	1.1324	2.0606	null	null		null	null		null	null		7.7977	0.48374		-2.0166	2.134e-05	Down	-1.1529	0.0055557		Unigene10076_All//gi|224114738|ref|XP_002332312.1|//9.00E-08//predicted protein [Populus trichocarpa] >gi|222832311|gb|EEE70788.1| predicted protein [Populus trichocarpa]						nr -
Unigene10078_All	346	0	108.368	30.6264	0	0	0	0	0	0	16.7256	2.235e-216	Up	14.9025	1.6579e-59	Up	null	null		null	null		null	null		null	null		Unigene10078_All//gi|195620360|gb|ACG32010.1|//2.00E-39//60S ribosomal protein L27a-3 [Zea mays]	Unigene10078_All//1.00E-26//AT1G23290| RPL27AB; structural constituent of ribosome	Unigene10078_All//3.00E-20//TC169611		ko03010|Ribosome	GO:0005198//GO:0010467//GO:0030529	nr -
Unigene100795_All	365	0	0	0	0.1365	0.4717	0	6.4868	5.7254	1.4189	null	null		null	null		1.789	0.52158		-7.0928	0.64732		-0.1801	0.63382		-2.1927	1.2849e-07	Down	Unigene100795_All//gi|9294177|dbj|BAB02079.1|//9.00E-20//nodulin-lile protein [Arabidopsis thaliana]	Unigene100795_All//4.00E-21//AT3G25190| nodulin, putative	Unigene100795_All//5.00E-62//gi|109868191|gb|DW497167.1|DW497167				nr -
Unigene10084_All	254	0	4.1892	1.6772	0	0	0	0	0	0	12.0325	3.8157e-06	Up	10.7118	0.01386		null	null		null	null		null	null		null	null		Unigene10084_All//gi|301111870|ref|XP_002905014.1|//6.00E-25//superoxide dismutase, mitochondrial precursor [Phytophthora infestans T30-4] >gi|262095344|gb|EEY53396.1| superoxide dismutase, mitochondrial precursor [Phytophthora infestans T30-4]	Unigene10084_All//3.00E-19//AT3G10920| MSD1 (MANGANESE SUPEROXIDE DISMUTASE 1); metal ion binding / superoxide dismutase			ko04146|Peroxisome	GO:0003824//GO:0005488//GO:0044237	nr -
Unigene100844_All	296	53.3814	23.2806	17.6301	74.8896	57.4697	77.8153	80.9894	27.8168	35.8009	-1.1972	7.3169e-16	Down	-1.5983	3.2907e-23	Down	-0.382	0.00048094		0.0553	0.67239		-1.5418	3.8032e-42	Down	-1.1777	5.1707e-29	Down	Unigene100844_All//gi|15231288|ref|NP_187967.1|//7.00E-26//60S ribosomal protein L7 (RPL7D) [Arabidopsis thaliana] >gi|42572417|ref|NP_974304.1| 60S ribosomal protein L7 (RPL7D) [Arabidopsis thaliana] >gi|42572419|ref|NP_974305.1| 60S ribosomal protein L7 (RPL7D) [Arabidopsis thaliana] >gi|38503370|sp|Q9LHP1.1|RL74_ARATH RecName: Full=60S ribosomal protein L7-4 >gi|11994560|dbj|BAB02600.1| 60S ri…	Unigene100844_All//3.00E-27//AT3G13580| 60S ribosomal protein L7 (RPL7D)	Unigene100844_All//5.00E-74//EV497578		ko03010|Ribosome	GO:0005198//GO:0005488//GO:0009536//GO:0010467//GO:0015934//GO:0016020//GO:0030312//GO:0031981	nr -
Unigene10085_All	234	65.0656	19.7048	29.5833	99.2027	79.6132	118.506	62.6975	16.6111	42.9031	-1.7233	6.6979e-26	Down	-1.1371	1.521e-13	Down	-0.3174	0.003631		0.2565	0.015804		-1.9163	3.8035e-35	Down	-0.5473	1.5995e-05		Unigene10085_All//gi|76160947|gb|ABA40437.1|//3.00E-11//40S ribosomal protein S7-like protein [Solanum tuberosum] >gi|77999315|gb|ABB17004.1| ribosomal protein S7-like protein [Solanum tuberosum] >gi|82623373|gb|ABB87101.1| 40S ribosomal protein S7-like protein-like [Solanum tuberosum]	Unigene10085_All//2.00E-10//AT3G02560| 40S ribosomal protein S7 (RPS7B)	Unigene10085_All//1.00E-89//gi|13355512|gb|BG445860.1|BG445860		ko03010|Ribosome	GO:0005198//GO:0010467//GO:0030529	nr -
Unigene10088_All	459	0	0	0	0.3256	0.6752	0.7872	1.4738	1.7301	3.9925	null	null		null	null		1.0522	0.5317		1.2736	0.38204		0.2313	0.73461		1.4378	0.00095846	Up
Unigene10089_All	472	0	0	0	0	0.2189	0.1914	3.3143	0.4428	1.1817	null	null		null	null		7.7741	0.45928		7.5804	0.48361		-2.904	1.1324e-06	Down	-1.4878	0.0017362		Unigene10089_All//gi|15239653|ref|NP_200262.1|//1.00E-49//DFL1 (DWARF IN LIGHT 1); indole-3-acetic acid amido synthetase [Arabidopsis thaliana] >gi|62900334|sp|Q9LSQ4.1|GH36_ARATH RecName: Full=Indole-3-acetic acid-amido synthetase GH3.6; AltName: Full=Auxin-responsive GH3-like protein 6; Short=AtGH3-6; AltName: Full=Protein DWARF IN LIGHT 1; Short=DFL-1 >gi|8885594|dbj|BAA97524.1| auxin-responsi…	Unigene10089_All//7.00E-51//AT5G54510| DFL1 (DWARF IN LIGHT 1); indole-3-acetic acid amido synthetase	Unigene10089_All//1.00E-07//DW501990			GO:0000902//GO:0009314//GO:0009536//GO:0009755//GO:0016881//GO:0048878	nr -
Unigene100896_All	313	0.3343	0.9713	0.6805	3.183	0.4401	0.8658	0.5403	0	0.2546	1.5388	0.32369		1.0255	0.59279		-2.8545	0.00023682	Down	-1.8783	0.011772		-9.0776	0.13541		-1.0855	0.55369
Unigene100906_All	390	0.1342	1.8189	0.4096	0.2555	0.1766	1.3896	16.2616	6.4301	81.6181	3.7606	0.0023624		1.6098	0.51201		-0.5328	0.82018		2.4433	0.044155		-1.3386	1.2259e-09	Down	2.3274	4.3075e-98	Up	Unigene100906_All//gi|75297894|sp|Q84MB3.1|ACCH1_ARATH//4.00E-33//RecName: Full=1-aminocyclopropane-1-carboxylate oxidase homolog 1 >gi|30102640|gb|AAP21238.1| At1g06620 [Arabidopsis thaliana] >gi|110743652|dbj|BAE99663.1| oxidoreductase like protein [Arabidopsis thaliana]	Unigene100906_All//2.00E-34//AT1G06620| 2-oxoglutarate-dependent dioxygenase, putative	Unigene100906_All//1.00E-133//gi|109879784|gb|DW508754.1|DW508754		ko00941|Flavonoid biosynthesis//ko00402|Benzoxazinoid biosynthesis	GO:0008152//GO:0016706//GO:0046914	nr -
Unigene100908_All	2421	0.0432	0.4604	0.2419	0.0617	0.1565	14.3083	0	0	0	3.4138	0.00012434	Up	2.4853	0.037558		1.3428	0.34015		7.8574	2.1325e-206	Up	null	null		null	null		Unigene100908_All//sp|Q16927|VIT1_AEDAE//3.00E-56//Vitellogenin-A1 OS=Aedes aegypti GN=VGA1 PE=1 SV=2						swissprot -
Unigene10091_All	904	0	8.0152	2.7096	0	0	0	0	0	0	12.9685	2.0411e-41	Up	11.4039	1.6426e-13	Up	null	null		null	null		null	null		null	null		Unigene10091_All//gi|301107486|ref|XP_002902825.1|//7.00E-52//long-chain-fatty-acid-CoA ligase [Phytophthora infestans T30-4] >gi|262097943|gb|EEY55995.1| long-chain-fatty-acid-CoA ligase [Phytophthora infestans T30-4]	Unigene10091_All//5.00E-17//AT4G14070| AAE15 (acyl-activating enzyme 15); long-chain-fatty-acid-[acyl-carrier-protein] ligase			ko00940|Phenylpropanoid biosynthesis//ko04146|Peroxisome//ko00360|Phenylalanine metabolism//ko00071|Fatty acid metabolism//ko00130|Ubiquinone and other terpenoid-quinone biosynthesis		nr -
Unigene10092_All	391	0.1338	56.501	24.1055	0	0	0	0	0	0	8.7221	7.6587e-125	Up	7.4931	6.5076e-51	Up	null	null		null	null		null	null		null	null								ESTscan +
Unigene10093_All	346	0.3024	0	0	1.8716	2.9857	0.5221	0	1.5704	0.2303	-8.2403	0.37816		-8.2403	0.40023		0.6738	0.34872		-1.8419	0.060109		10.6169	0.00053664	Up	7.8474	0.40684				Unigene10093_All//8.00E-172//TC147034
Unigene100964_All	213	0	0	0	0.4677	0.3233	4.4527	0.1985	0.9811	0	null	null		null	null		-0.5327	0.82015		3.251	0.00058402	Up	2.3053	0.24019		-7.633	0.62076				Unigene100964_All//7.00E-20//DR457055
Unigene10098_All	531	0	0	0	0	0	0	2.2295	9.2092	1.0504	null	null		null	null		null	null		null	null		2.0464	3.3116e-13	Up	-1.0858	0.043787
Unigene1010_All	4361	4.571	2.2076	3.5044	3.027	3.0006	2.589	12.274	9.9003	5.2253	-1.05	3.4699e-16	Down	-0.3833	0.0030305		-0.0126	0.95194		-0.2255	0.19034		-0.3101	1.5032e-06		-1.232	2.4669e-68	Down	Unigene1010_All//gi|224053809|ref|XP_002297990.1|//0.00E+00//multidrug resistance protein ABC transporter family [Populus trichocarpa] >gi|222845248|gb|EEE82795.1| multidrug resistance protein ABC transporter family [Populus trichocarpa]	Unigene1010_All//0.00E+00//AT3G13080| ATMRP3; ATPase, coupled to transmembrane movement of substances / chlorophyll catabolite transporter/ glutathione S-conjugate-exporting ATPase	Unigene1010_All//3.00E-20//TC139924		ko02010|ABC transporters	GO:0006810//GO:0015405//GO:0017111//GO:0031224//GO:0032559	nr +
Unigene101002_All	382	0	0	0	0.5216	0.0901	0.1182	1.7709	0.1094	0.5214	null	null		null	null		-2.5333	0.23424		-2.1417	0.34777		-4.0168	0.00053644	Down	-1.764	0.027986		Unigene101002_All//gi|224097478|ref|XP_002310952.1|//9.00E-07//predicted protein [Populus trichocarpa] >gi|222850772|gb|EEE88319.1| predicted protein [Populus trichocarpa]	Unigene101002_All//2.00E-06//AT2G33840| tRNA synthetase class I (W and Y) family protein	Unigene101002_All//8.00E-126//gi|11204884|gb|BF273826.1|BF273826		ko00970|Aminoacyl-tRNA biosynthesis		nr -
Unigene10101_All	1285	0	0	0	0	0	0	4.7051	11.8394	1.5811	null	null		null	null		null	null		null	null		1.3313	8.5183e-22	Up	-1.5733	6.4379e-12	Down
Unigene101019_All	212	0.9872	0.478	2.0094	0.235	0.9746	0.8521	0.1994	2.5629	6.0134	-1.0463	0.56552		1.0254	0.39677		2.0521	0.39541		1.8584	0.4597		3.684	0.0036905		4.9144	5.186e-08	Up			Unigene101019_All//4.00E-18//TC141091
Unigene101039_All	270	0.3876	0.3753	0.1972	0.9225	1.7855	2.0073	0.1566	0.9288	9.7383	-0.0465	0.99134		-0.9749	0.72273		0.9527	0.42371		1.1216	0.30527		2.5683	0.15314		5.9585	2.5417e-17	Up			Unigene101039_All//2.00E-51//DT527515
Unigene101047_All	207	2.2748	1.2239	7.9746	6.2569	3.9925	0.6545	0.6128	0	0	-0.8943	0.38867		1.8097	0.0017607		-0.6482	0.27249		-3.257	1.9816e-05	Down	-9.2593	0.23707		-9.2593	0.20108
Unigene101050_All	625	0	0	0	0.3188	0.1102	0.7226	1.7589	0	0.4462	null	null		null	null		-1.5325	0.41694		1.1805	0.33809		-10.7805	7.6701e-08	Down	-1.9789	0.0013891		Unigene101050_All//gi|119507465|dbj|BAF42040.1|//1.00E-90//pectin methylesterase 3 [Pyrus communis]	Unigene101050_All//6.00E-89//AT1G02810| pectinesterase family protein	Unigene101050_All//0.00E+00//TC138774		ko00500|Starch and sucrose metabolism//ko00040|Pentose and glucuronate interconversions	GO:0004091//GO:0005618//GO:0030234//GO:0071555	nr -
Unigene10106_All	383	0.9563	0.2646	0.8342	1.3006	1.1688	0.5896	2.2078	0.1091	0.3121	-1.8537	0.18728		-0.1971	0.86631		-0.1541	0.84974		-1.1414	0.30724		-4.3389	4.5558e-05	Down	-2.8225	0.00053789	Down			Unigene10106_All//4.00E-07//ES837531
Unigene10107_All	676	0	1.1993	0	0.5895	1.7829	1.0021	0.2502	0.3091	0.4125	10.228	9.3882e-05	Up	null	null		1.5967	0.013573		0.7655	0.41017		0.305	0.83689		0.7213	0.59745		Unigene10107_All//gi|297804010|ref|XP_002869889.1|//3.00E-63//At4g21420 [Arabidopsis lyrata subsp. lyrata] >gi|297315725|gb|EFH46148.1| At4g21420 [Arabidopsis lyrata subsp. lyrata]	Unigene10107_All//1.00E-08//AT5G42905| nucleic acid binding / ribonuclease H	Unigene10107_All//0.00E+00//gi|3326554|gb|AI055440.1|AI055440			GO:0005488//GO:0016891//GO:0043231	nr +
Unigene10109_All	924	0	12.9415	4.207	0.0539	0	0	0	0	0	13.6597	1.3592e-68	Up	12.0386	1.5153e-21	Up	-5.7522	0.56685		-5.7522	0.64714		null	null		null	null		Unigene10109_All//gi|297800072|ref|XP_002867920.1|//1.00E-18//glycosyl hydrolase family 18 protein [Arabidopsis lyrata subsp. lyrata] >gi|297313756|gb|EFH44179.1| glycosyl hydrolase family 18 protein [Arabidopsis lyrata subsp. lyrata]	Unigene10109_All//3.00E-17//AT4G19810| glycosyl hydrolase family 18 protein				GO:0003824	nr -
Unigene101106_All	204	0	0	0	0.4884	0	0.4428	27.565	49.991	76.1621	null	null		null	null		-8.9319	0.3183		-0.1414	0.95376		0.8588	1.0204e-07		1.4662	3.2939e-26	Up			Unigene101106_All//6.00E-42//gi|31407394|gb|CD486429.1|CD486429
Unigene10111_All	570	0	10.9339	4.1105	0	0	0	0	0	0	13.4165	1.3795e-35	Up	12.0051	6.4127e-13	Up	null	null		null	null		null	null		null	null		Unigene10111_All//gi|8954372|ref|NP_059361.1|//4.00E-34//NADH dehydrogenase subunit 4 [Cyanidioschyzon merolae] >gi|4115785|dbj|BAA36523.1| NADH-ubiquinone oxidoreductase chain 4 [Cyanidioschyzon merolae strain 10D]	Unigene10111_All//2.00E-14//ATMG00580| NADH dehydrogenase subunit 4			ko00190|Oxidative phosphorylation	GO:0016020//GO:0055114	nr -
Unigene10112_All	381	0	0	0	0	0	0	4.6608	7.0208	0.2091	null	null		null	null		null	null		null	null		0.5911	0.089746		-4.4783	1.0012e-10	Down
Unigene10114_All	426	0	21.2907	17.125	0.2339	0	0	0	0	0	14.3779	6.3238e-52	Up	14.0638	8.907e-41	Up	-7.8697	0.31829		-7.8697	0.40618		null	null		null	null		Unigene10114_All//gi|159483157|ref|XP_001699629.1|//4.00E-25//acidic ribosomal protein P1 [Chlamydomonas reinhardtii] >gi|266947|sp|P29763.1|RLA1_CHLRE RecName: Full=60S acidic ribosomal protein P1 >gi|18211|emb|CAA47042.1| ribosomal protein P1 [Chlamydomonas reinhardtii] >gi|158272734|gb|EDO98531.1| acidic ribosomal protein P1 [Chlamydomonas reinhardtii]	Unigene10114_All//2.00E-14//AT5G24510| 60s acidic ribosomal protein P1, putative			ko03010|Ribosome	GO:0030529	nr +
Unigene10115_All	553	3.1222	1.0995	0.4815	0.4504	0.6227	0.3267	0.3058	0.0756	0.2161	-1.5057	0.00395		-2.697	2.3993e-05	Down	0.4673	0.77973		-0.4632	0.74502		-2.0161	0.36853		-0.5009	0.74742
Unigene101179_All	205	0	0	0	0	0	0	12.5809	0.2039	0.3887	null	null		null	null		null	null		null	null		-5.9472	9.3514e-17	Down	-5.0164	2.7804e-16	Down	Unigene101179_All//gi|18558997|gb|AAL73112.1|//1.00E-10//bacterial-induced peroxidase [Gossypium hirsutum]	Unigene101179_All//8.00E-09//AT5G39580| peroxidase, putative	Unigene101179_All//4.00E-46//TC171015		ko00940|Phenylpropanoid biosynthesis//ko00360|Phenylalanine metabolism	GO:0003824//GO:0005506//GO:0006950//GO:0016209//GO:0042743	nr -
Unigene10118_All	285	0	0	0	0	0	0	4.0055	4.3996	0	null	null		null	null		null	null		null	null		0.1354	0.80329		-11.9678	1.6467e-08	Down	Unigene10118_All//gi|55168340|gb|AAV44205.1|//3.00E-10//unknow protein [Oryza sativa Japonica Group]						nr +
Unigene10119_All	409	0	0	0	0	0	0	1.8607	4.292	0	null	null		null	null		null	null		null	null		1.2058	0.0071635		-10.8616	8.8897e-06	Down	Unigene10119_All//gi|297845688|ref|XP_002890725.1|//4.00E-28//60S ribosomal protein L17 [Arabidopsis lyrata subsp. lyrata] >gi|297336567|gb|EFH66984.1| 60S ribosomal protein L17 [Arabidopsis lyrata subsp. lyrata]	Unigene10119_All//3.00E-28//AT1G27400| 60S ribosomal protein L17 (RPL17A)			ko03010|Ribosome	GO:0005198//GO:0009536//GO:0010467//GO:0015934//GO:0016020//GO:0031981	nr -
Unigene1012_All	811	1.6774	3.3113	1.9041	5.958	6.2841	6.1814	8.8105	17.9861	15.7684	0.9812	0.011337		0.1829	0.71948		0.0769	0.83882		0.0531	0.87082		1.0296	3.5081e-14	Up	0.8397	2.0702e-09		Unigene1012_All//gi|15230596|ref|NP_187250.1|//1.00E-06//leucine-rich repeat family protein [Arabidopsis thaliana] >gi|30102730|gb|AAP21283.1| At3g05990 [Arabidopsis thaliana]		Unigene1012_All//0.00E+00//gi|109888009|gb|DW516978.1|DW516978			GO:0005488//GO:0023060	nr +
Unigene10123_All	430	0	6.3631	5.2012	0	0	0	0	0	0.1853	12.6355	1.4432e-15	Up	12.3446	2.5059e-12	Up	null	null		null	null		null	null		7.5337	0.40679		Unigene10123_All//gi|192910698|gb|ACF06457.1|//5.00E-42//60S ribosomal protein L35 [Elaeis guineensis]	Unigene10123_All//4.00E-31//AT2G39390| 60S ribosomal protein L35 (RPL35B)			ko03010|Ribosome	GO:0005198//GO:0010467//GO:0030529	nr -
Unigene10124_All	399	3.1471	0.7619	0	1.1236	1.2946	0.3396	0	0.2095	0	-2.0463	0.0023298		-11.6198	7.1142e-07	Down	0.2044	0.85899		-1.7262	0.16142		7.7108	0.40439		null	null								ESTscan -
Unigene101257_All	206	0.762	3.1976	0	0.4836	1.5045	4.3848	0.821	0.6087	1.3537	2.0691	0.039272		-9.5736	0.24675		1.6374	0.3217		3.1806	0.00097418	Up	-0.4317	0.79416		0.7215	0.59744
Unigene10126_All	379	0	4.4119	6.0416	0	0.1817	0	0	0	0	12.1072	1.5394e-09	Up	12.5607	1.2676e-12	Up	7.5054	0.6174		null	null		null	null		null	null		Unigene10126_All//sp|Q95339|ATPK_PIG//6.00E-11//ATP synthase subunit f, mitochondrial OS=Sus scrofa GN=ATP5J2 PE=3 SV=4						swissprot +
Unigene10127_All	398	0.6573	0.7639	1.0704	0	1.9035	0.4539	0.8499	0.4201	0.5005	0.2168	0.8649		0.7035	0.5541		10.8944	0.00011729	Up	8.8262	0.19592		-1.0166	0.40002		-0.7639	0.5016		Unigene10127_All//gi|186511604|ref|NP_192625.4|//9.00E-37//kinase [Arabidopsis thaliana] >gi|222423559|dbj|BAH19749.1| AT4G08850 [Arabidopsis thaliana]	Unigene10127_All//5.00E-38//AT4G08850| kinase	Unigene10127_All//7.00E-117//DR462992		ko03410|Base excision repair	GO:0004672//GO:0006464//GO:0016628//GO:0032559	nr -
Unigene101271_All	330	0.6342	0.1535	1.6136	1.5095	0.8348	0.6843	6.4061	1.7732	2.8974	-2.0467	0.33406		1.3473	0.22522		-0.8546	0.40694		-1.1414	0.30724		-1.8531	1.7596e-05	Down	-1.1447	0.0030367		Unigene101271_All//gi|71535005|gb|AAZ32900.1|//2.00E-18//zinc finger Glo3-like protein [Medicago sativa]	Unigene101271_All//3.00E-19//AT4G17890| AGD8 (ARF-GAP DOMAIN 8); ARF GTPase activator/ DNA binding / zinc ion binding	Unigene101271_All//4.00E-81//TC132880		ko04144|Endocytosis	GO:0005083//GO:0032012//GO:0043231//GO:0046914	nr +
Unigene10129_All	356	0	1.8503	2.6924	1.1194	0.0967	0	0.5938	0.1174	0	10.8535	0.00062605	Up	11.3947	2.4609e-05	Up	-3.5331	0.020972		-10.1285	0.011131		-2.3385	0.2375		-9.2138	0.058376		Unigene10129_All//gi|223452526|gb|ACM89590.1|//6.00E-20//disease resistance protein [Glycine max]	Unigene10129_All//7.00E-10//AT1G58190| AtRLP9 (Receptor Like Protein 9); protein binding				GO:0005488//GO:0016301	nr +
Unigene10131_All	404	0	15.4266	4.2178	0	0	0	0	0	0	13.9131	1.3791e-35	Up	12.0423	2.2013e-09	Up	null	null		null	null		null	null		null	null		Unigene10131_All//gi|219125548|ref|XP_002183039.1|//1.00E-20//thioredoxin h [Phaeodactylum tricornutum CCAP 1055/1] >gi|217405314|gb|EEC45257.1| thioredoxin h [Phaeodactylum tricornutum CCAP 1055/1]	Unigene10131_All//2.00E-19//AT1G19730| ATTRX4; oxidoreductase, acting on sulfur group of donors, disulfide as acceptor				GO:0005488//GO:0005737//GO:0008152//GO:0009987	nr -
Unigene101317_All	718	0	0	0	0.1388	0	0.1887	1.1188	0.0582	0.111	null	null		null	null		-7.1169	0.31825		0.4431	0.86336		-4.2648	8.4813e-05	Down	-3.3333	0.00024684	Down	Unigene101317_All//gi|15241528|ref|NP_196427.1|//1.00E-88//L-asparaginase / L-asparagine amidohydrolase [Arabidopsis thaliana] >gi|25108880|sp|P50287.2|ASPG1_ARATH RecName: Full=Isoaspartyl peptidase/L-asparaginase 1; AltName: Full=L-asparagine amidohydrolase 1; Contains: RecName: Full=Isoaspartyl peptidase/L-asparaginase 1 subunit alpha; Contains: RecName: Full=Isoaspartyl peptidase/L-asparagina…	Unigene101317_All//8.00E-90//AT5G08100| L-asparaginase / L-asparagine amidohydrolase	Unigene101317_All//0.00E+00//gi|78347096|gb|DT567370.1|DT567370			GO:0008242//GO:0009057//GO:0016811	nr -
Unigene101318_All	212	0.2468	0	0	0.235	0.8122	4.2607	0	0.1971	0	-7.9472	0.62308		-7.9472	0.63596		1.7892	0.52151		4.1804	0.00019521	Up	7.6228	0.64066		null	null
Unigene101319_All	232	1.1276	0	0	0	0	0	4.9205	0.3603	1.0303	-10.139	0.067294		-10.139	0.086056		null	null		null	null		-3.7715	3.8981e-06	Down	-2.2557	0.00034023	Down	Unigene101319_All//gi|16416376|dbj|BAB21610.2|//6.00E-21//mangrin [Bruguiera sexangula]	Unigene101319_All//2.00E-15//AT3G25760| AOC1 (ALLENE OXIDE CYCLASE 1); allene-oxide cyclase	Unigene101319_All//7.00E-82//DW500651		ko00592|alpha-Linolenic acid metabolism	GO:0009536//GO:0009694//GO:0009975	nr +
Unigene10132_All	820	0	7.5386	2.7274	0	0	0	0	0	0	12.8801	2.6977e-35	Up	11.4133	2.5054e-12	Up	null	null		null	null		null	null		null	null		Unigene10132_All//gi|115459616|ref|NP_001053408.1|//1.00E-103//Os04g0533000 [Oryza sativa Japonica Group] >gi|75327302|sp|Q7XMK8.1|RH6_ORYSJ RecName: Full=DEAD-box ATP-dependent RNA helicase 6 >gi|32489827|emb|CAE04571.1| OSJNBb0039L24.10 [Oryza sativa (japonica cultivar-group)] >gi|113564979|dbj|BAF15322.1| Os04g0533000 [Oryza sativa Japonica Group]	Unigene10132_All//1.00E-103//AT4G00660| DEAD/DEAH box helicase, putative			ko03018|RNA degradation		nr +
Unigene10135_All	433	2.175	1.6383	1.4758	5.6372	2.9425	0.8344	0.9764	0.3861	0	-0.4088	0.56664		-0.5595	0.439		-0.9379	0.014649		-2.7562	2.091e-08	Down	-1.3385	0.22457		-9.9313	0.0021514
Unigene101358_All	379	0	0.6685	0	0.1314	0	1.9066	45.9616	79.842	261.316	9.3848	0.078924		null	null		-7.0378	0.5667		3.859	0.0017473		0.7967	7.8663e-19		2.5073	0	Up	Unigene101358_All//gi|224092400|ref|XP_002309592.1|//4.00E-25//2-oxoglutarate-dependent dioxygenase [Populus trichocarpa] >gi|222855568|gb|EEE93115.1| 2-oxoglutarate-dependent dioxygenase [Populus trichocarpa]	Unigene101358_All//6.00E-18//AT1G52800| oxidoreductase, 2OG-Fe(II) oxygenase family protein	Unigene101358_All//3.00E-162//gi|31407058|gb|CD486093.1|CD486093			GO:0016491	nr -
Unigene101372_All	209	0.2503	0	5.6053	2.8601	0.8238	3.0253	0	0	0.3812	-7.9675	0.62305		4.4851	1.8976e-05	Up	-1.7957	0.058658		0.081	0.94551		null	null		8.5744	0.40677
Unigene101390_All	266	0	0	0	0.3745	0.2589	6.4519	0	0.7856	0	null	null		null	null		-0.5326	0.82008		4.1067	5.0329e-08	Up	9.6177	0.07874		null	null		Unigene101390_All//gi|224143857|ref|XP_002336087.1|//4.00E-22//white-brown-complex ABC transporter family [Populus trichocarpa] >gi|222871834|gb|EEF08965.1| white-brown-complex ABC transporter family [Populus trichocarpa]	Unigene101390_All//5.00E-11//AT3G21090| ABC transporter family protein	Unigene101390_All//2.00E-70//CO132421			GO:0000166//GO:0017111	nr +
Unigene1014_All	456	0.1147	0.2222	0.9342	1.4201	1.9634	1.0895	1.9471	1.5582	4.8051	0.954	0.72832		3.0259	0.057366		0.4674	0.57168		-0.3823	0.67777		-0.3214	0.63341		1.3032	0.00076555	Up	Unigene1014_All//gi|224085664|ref|XP_002307656.1|//1.00E-23//chromatin remodeling complex subunit [Populus trichocarpa] >gi|222857105|gb|EEE94652.1| chromatin remodeling complex subunit [Populus trichocarpa]	Unigene1014_All//1.00E-15//AT2G18760| CHR8 (chromatin remodeling 8); ATP binding / DNA binding / helicase/ nucleic acid binding			ko03420|Nucleotide excision repair	GO:0003676//GO:0003824//GO:0006259//GO:0010212	nr -
Unigene101404_All	205	0	20.2678	0.2598	0.486	0.8399	1.5422	0	0	0	14.3069	1.1554e-23	Up	8.0213	0.64294		0.7893	0.77201		1.666	0.30931		null	null		null	null		Unigene101404_All//gi|297812271|ref|XP_002874019.1|//3.00E-13//glycosyl hydrolase family 17 protein [Arabidopsis lyrata subsp. lyrata] >gi|297319856|gb|EFH50278.1| glycosyl hydrolase family 17 protein [Arabidopsis lyrata subsp. lyrata]	Unigene101404_All//2.00E-14//AT5G20870| glycosyl hydrolase family 17 protein	Unigene101404_All//2.00E-11//gi|78329547|gb|DT549821.1|DT549821				nr +
Unigene10141_All	663	0	10.9287	5.7828	0	0	0	0	0	0	13.4158	2.0405e-41	Up	12.4976	3.0235e-21	Up	null	null		null	null		null	null		null	null								ESTscan -
Unigene10142_All	516	0	0	0	0	0.1335	0.0875	8.1119	4.374	0.7721	null	null		null	null		7.0607	0.61735		6.4512	0.70544		-0.8911	0.00078314		-3.3932	4.5102e-20	Down	Unigene10142_All//gi|254803073|gb|ACT82815.1|//8.00E-13//At1g29270 [Arabidopsis thaliana]	Unigene10142_All//4.00E-11//AT1G29270| unknown protein	Unigene10142_All//3.00E-89//gi|109881197|gb|DW510167.1|DW510167				nr +
Unigene101435_All	574	0.1823	0	0	0.6075	0.12	0.1574	1.1785	0.2913	0	-7.5102	0.37801		-7.5102	0.4001		-2.3399	0.10091		-1.9484	0.19624		-2.0164	0.019843		-10.2027	3.5696e-05	Down	Unigene101435_All//gi|260446978|emb|CBG76260.1|//1.00E-30//OO_Ba0005L10-OO_Ba0081K17.11 [Oryza officinalis]	Unigene101435_All//5.00E-29//AT3G19850| phototropic-responsive NPH3 family protein				GO:0005488//GO:0009314//GO:0044464//GO:0060089	nr +
Unigene10144_All	449	0	20.6515	7.4716	0	0	0	0	0	0	14.334	4.2925e-53	Up	12.8672	1.4717e-18	Up	null	null		null	null		null	null		null	null								ESTscan -
Unigene10145_All	410	0	0	0	10.5703	4.7873	3.4148	0	0	0	null	null		null	null		-1.1427	2.8031e-05	Down	-1.6301	9.028e-08	Down	null	null		null	null		Unigene10145_All//gi|104295001|gb|ABF72016.1|//9.00E-36//GDSL-motif lipase/hydrolase family protein [Musa acuminata]	Unigene10145_All//3.00E-26//AT5G45670| GDSL-motif lipase/hydrolase family protein	Unigene10145_All//6.00E-170//ES847780			GO:0016787//GO:0044238	nr -
Unigene101501_All	214	0	0	0	0	0	0	0.9879	6.8358	1.3031	null	null		null	null		null	null		null	null		2.7907	4.8537e-06	Up	0.3995	0.74322		Unigene101501_All//gi|225449847|ref|XP_002265001.1|//4.00E-07//PREDICTED: hypothetical protein [Vitis vinifera]	Unigene101501_All//5.00E-07//AT1G62600| flavin-containing monooxygenase family protein / FMO family protein				GO:0000166//GO:0004497	nr +
Unigene10151_All	283	0	1.7904	0	0	0.7301	0.3192	0.4482	0.7384	3.2378	10.8061	0.0040531		null	null		9.512	0.15753		8.3183	0.48325		0.7203	0.63255		2.8528	0.00031796	Up			Unigene10151_All//2.00E-128//CO078325
Unigene10152_All	572	0.1829	0.1772	0.0931	5.6607	3.2509	1.6581	0.9609	0.4384	0.1393	-0.0457	0.9913		-0.9742	0.72267		-0.8001	0.013971		-1.7714	1.264e-06	Down	-1.1321	0.21782		-2.7862	0.0079684		Unigene10152_All//gi|297821166|ref|XP_002878466.1|//9.00E-87//DNAJ heat shock family protein [Arabidopsis lyrata subsp. lyrata] >gi|297324304|gb|EFH54725.1| DNAJ heat shock family protein [Arabidopsis lyrata subsp. lyrata]	Unigene10152_All//5.00E-88//AT3G62600| ATERDJ3B; heat shock protein binding / unfolded protein binding	Unigene10152_All//0.00E+00//DR456694		ko04141|Protein processing in endoplasmic reticulum	GO:0005515//GO:0016020//GO:0031410//GO:0044267//GO:0044432	nr -
Unigene101529_All	221	3.0777	6.8782	10.8428	9.6924	9.3489	2.4523	1.3392	0.3782	2.3434	1.1602	0.034275		1.8168	9.6593e-05	Up	-0.0521	0.90186		-1.9827	3.0602e-05	Down	-1.8242	0.21123		0.8072	0.36647				Unigene101529_All//2.00E-69//DV849351
Unigene10154_All	557	0.1879	2.4561	0.0956	0.7155	1.9783	0.4865	1.8977	4.4272	2.0742	3.7083	7.1762e-06	Up	-0.9749	0.72266		1.4672	0.030949		-0.5565	0.63817		1.2221	0.00090076	Up	0.1283	0.81075
Unigene101542_All	211	0	0	0	0	0	0.6421	1.2023	0.5943	6.2307	null	null		null	null		null	null		9.3267	0.31339		-1.0165	0.49553		2.3736	7.204e-05	Up	Unigene101542_All//gi|110738232|dbj|BAF01045.1|//1.00E-07//serine/threonine kinase - like protein [Arabidopsis thaliana]	Unigene101542_All//6.00E-09//AT4G21390| B120; ATP binding / protein kinase/ protein serine/threonine kinase/ sugar binding				GO:0004672//GO:0005488//GO:0009987	nr +
Unigene101555_All	276	7.5827	5.6911	5.4022	5.7756	5.4897	5.0727	3.5233	0.6057	1.4434	-0.414	0.37178		-0.4892	0.30313		-0.0732	0.87742		-0.1872	0.71775		-2.5403	0.0006416	Down	-1.2875	0.036192		Unigene101555_All//gi|226492900|ref|NP_001148774.1|//1.00E-08//mitochondrial ribosomal protein L43 [Zea mays] >gi|195622062|gb|ACG32861.1| mitochondrial ribosomal protein L43 [Zea mays]	Unigene101555_All//7.00E-10//AT3G59650| mitochondrial ribosomal protein L51/S25/CI-B8 family protein	Unigene101555_All//5.00E-83//TC165625			GO:0030529	nr -
Unigene10156_All	300	0	1.8579	3.195	0.166	0.3444	0.1505	0	0	0	10.8595	0.0021863		11.6416	2.4607e-05	Up	1.0529	0.81034		-0.1414	0.95767		null	null		null	null		Unigene10156_All//gi|116056517|emb|CAL52806.1|//3.00E-10//Sel1-like repeat (ISS) [Ostreococcus tauri]	Unigene10156_All//2.00E-09//AT1G70590| F-box family protein			ko04141|Protein processing in endoplasmic reticulum		nr +
Unigene10157_All	559	0.3744	1.5409	0	0.8911	0.924	0.6463	1.0589	2.0935	3.7059	2.0411	0.015947		-8.5484	0.14682		0.0523	0.97994		-0.4634	0.65917		0.9834	0.083037		1.8073	2.2281e-05	Up			Unigene10157_All//8.00E-19//TC146433
Unigene1016_All	3371	3.2128	5.0504	3.6016	3.5022	7.8044	5.5466	22.7518	39.2788	35.5369	0.6526	1.2857e-06		0.1648	0.39017		1.156	1.5441e-28	Up	0.6633	1.052e-07		0.7878	4.0937e-78		0.6433	4.7685e-51		Unigene1016_All//gi|15239540|ref|NP_197965.1|//0.00E+00//leucine-rich repeat family protein / protein kinase family protein [Arabidopsis thaliana] >gi|5107831|gb|AAD40144.1|AF149413_25 contains similarity to protein kinase domains (Pfam F00069, Score=162.6, E=6.8e-45, N=1) and leucien rich repeats (Pfam PF00560, Score=210.7, E=2.2e-59, N=10) [Arabidopsis thaliana] >gi|224589685|gb|ACN59374.1| leu…	Unigene1016_All//0.00E+00//AT5G25930| leucine-rich repeat family protein / protein kinase family protein	Unigene1016_All//0.00E+00//TC138249			GO:0004674//GO:0006464//GO:0016491//GO:0031224//GO:0032559	nr +
Unigene101614_All	786	0	0	0	0.0634	0	4.5393	0	0	0	null	null		null	null		-5.9864	0.56653		6.1618	6.6457e-20	Up	null	null		null	null		Unigene101614_All//gi|300268585|gb|EFJ52765.1|//2.00E-11//pathogenesis-related protein 1-like protein [Volvox carteri f. nagariensis]				ko00230|Purine metabolism//ko00240|Pyrimidine metabolism//ko03020|RNA polymerase		nr +
Unigene10162_All	305	0	0	0.1746	2.9399	2.1451	0.1481	0.8317	0	0.2612	null	null		7.4479	0.64289		-0.4547	0.5581		-4.3111	0.00011429	Down	-9.6999	0.040653		-1.6709	0.25693				Unigene10162_All//8.00E-144//gi|78351568|gb|DT571842.1|DT571842
Unigene10164_All	248	2.5317	8.5811	1.0736	0.6026	0.5554	0.3642	0	0.3371	0.3213	1.7611	0.0002383	Up	-1.2376	0.21323		-0.1177	0.91179		-0.7265	0.71704		8.397	0.40431		8.3278	0.40673
Unigene101652_All	409	0	0	0	0.1218	0	0.2208	1.654	0.1022	1.3637	null	null		null	null		-6.9284	0.56649		0.8582	0.79763		-4.0165	0.00053642	Down	-0.2784	0.68887		Unigene101652_All//gi|224053787|ref|XP_002297979.1|//2.00E-32//AP2/ERF domain-containing transcription factor [Populus trichocarpa] >gi|222845237|gb|EEE82784.1| AP2/ERF domain-containing transcription factor [Populus trichocarpa]	Unigene101652_All//1.00E-15//AT1G64380| AP2 domain-containing transcription factor, putative	Unigene101652_All//2.00E-46//TC154225	AP2-EREBP		GO:0001071//GO:0003676//GO:0006351//GO:0009743//GO:0010468//GO:0043231	nr -
Unigene10166_All	1138	0	0	0	0	0	0.0397	10.1799	0.2938	2.3455	null	null		null	null		null	null		5.3111	0.70531		-5.1147	8.0509e-70	Down	-2.1178	1.0012e-32	Down	Unigene10166_All//gi|297793821|ref|XP_002864795.1|//1.00E-125//aldo/keto reductase family protein [Arabidopsis lyrata subsp. lyrata] >gi|297310630|gb|EFH41054.1| aldo/keto reductase family protein [Arabidopsis lyrata subsp. lyrata]	Unigene10166_All//3.00E-116//AT5G62420| aldo/keto reductase family protein			ko00010|Glycolysis / Gluconeogenesis//ko00051|Fructose and mannose metabolism//ko00561|Glycerolipid metabolism//ko00591|Linoleic acid metabolism//ko00650|Butanoate metabolism	GO:0006970//GO:0016616	nr +
Unigene101666_All	258	1.4196	1.1784	0.6192	1.7377	1.7351	1.4004	0.9833	4.698	0.4632	-0.2687	0.80103		-1.197	0.39596		-0.0022	0.9692		-0.3113	0.75732		2.2563	0.00033493	Up	-1.086	0.42873				Unigene101666_All//2.00E-64//CK640533
Unigene10168_All	454	0	0	0	0	0	0	4.2839	2.3015	0	null	null		null	null		null	null		null	null		-0.8964	0.03114		-12.0647	2.4125e-14	Down	Unigene10168_All//gi|240256452|ref|NP_200624.5|//3.00E-08//actin binding [Arabidopsis thaliana]					GO:0003824//GO:0008152	nr +
Unigene1017_All	941	5.7825	4.9539	3.7349	6.8289	4.1352	2.3038	6.515	0.8439	1.1431	-0.2231	0.39734		-0.6306	0.018284		-0.7237	0.00081774		-1.5676	1.2003e-10	Down	-2.9486	1.1227e-24	Down	-2.5108	1.4131e-21	Down	Unigene1017_All//gi|124359162|gb|ABN05685.1|//4.00E-14//RNA-directed DNA polymerase (Reverse transcriptase) [Medicago truncatula]	Unigene1017_All//3.00E-10//AT4G29090| reverse transcriptase, putative / RNA-dependent DNA polymerase, putative	Unigene1017_All//7.00E-113//TC135736				nr -
Unigene10170_All	876	0	0	0	0.0569	0.0786	0	0.4827	2.5764	2.7742	null	null		null	null		0.4661	0.96244		-5.8304	0.64694		2.4162	9.1354e-08	Up	2.5229	6.5294e-09	Up			Unigene10170_All//2.00E-23//DW234869
Unigene101703_All	208	0	0.2436	1.024	4.3108	0.1656	1.9542	1.0164	0.2009	0.7661	7.9284	0.6236		10	0.14212		-4.7022	1.269e-05	Down	-1.1414	0.13128		-2.3389	0.23749		-0.4079	0.75606
Unigene101708_All	211	9.6707	0.7204	2.2713	1.8887	1.7952	0.6421	0	0	0	-3.7468	1.1833e-08	Down	-2.0901	8.4446e-05	Down	-0.0732	0.92566		-1.5565	0.23133		null	null		null	null
Unigene10172_All	201	11.9739	15.6294	14.8358	111.029	105.019	102.46	45.4354	31.8147	20.8112	0.3844	0.28701		0.3092	0.41305		-0.0803	0.57869		-0.1159	0.40354		-0.5141	0.002514		-1.1265	7.2629e-11	Down	Unigene10172_All//gi|30725324|gb|AAP37684.1|//3.00E-17//At3g01680 [Arabidopsis thaliana]	Unigene10172_All//1.00E-18//AT3G01680| unknown protein	Unigene10172_All//2.00E-88//ES843933				nr +
Unigene101722_All	247	0.2118	0.4103	0	1.4117	0	1.6456	1.8829	13.3679	5	0.954	0.7283		-7.7266	0.63571		-10.4632	0.0094615		0.2212	0.86347		2.8277	5.3244e-13	Up	1.409	0.0097364		Unigene101722_All//gi|55818553|gb|AAV66071.1|//5.00E-08//acidic glucanase [Medicago sativa]		Unigene101722_All//2.00E-42//TC142668			GO:0016798	nr +
Unigene10174_All	397	0	3.5737	2.2802	0	0.0867	0	0	0	0	11.8032	4.064e-08	Up	11.1549	4.715e-05	Up	6.438	0.84193		null	null		null	null		null	null				Unigene10174_All//8.00E-18//FL577438
Unigene10175_All	473	0	0	0	0.4213	0	0	6.0783	4.6832	0.5054	null	null		null	null		-8.7187	0.084906		-8.7187	0.13445		-0.3762	0.28066		-3.5882	1.2204e-14	Down	Unigene10175_All//gi|297725019|ref|NP_001174873.1|//6.00E-19//Os06g0586150 [Oryza sativa Japonica Group] >gi|255677180|dbj|BAH93601.1| Os06g0586150 [Oryza sativa Japonica Group]	Unigene10175_All//3.00E-15//AT3G47580| leucine-rich repeat transmembrane protein kinase, putative			ko04626|Plant-pathogen interaction	GO:0000166//GO:0004672//GO:0008152	nr -
Unigene10177_All	277	0	0	0	0	0	0	2.7474	0	1.1506	null	null		null	null		null	null		null	null		-11.4239	1.6771e-05	Down	-1.2557	0.077025		Unigene10177_All//gi|42568648|ref|NP_200715.2|//5.00E-23//glycosyl transferase family 1 protein [Arabidopsis thaliana]	Unigene10177_All//2.00E-24//AT5G59070| glycosyl transferase family 1 protein				GO:0008152//GO:0016740	nr -
Unigene10179_All	239	1.3135	1.272	0.8912	2.5011	1.729	0	0	0	1.1668	-0.0463	0.98513		-0.5596	0.66393		-0.5326	0.56185		-11.2883	0.0007708	Down	null	null		10.1883	0.024421		Unigene10179_All//gi|77999307|gb|ABB17000.1|//2.00E-13//ribosomal protein L23 family protein [Solanum tuberosum]	Unigene10179_All//5.00E-13//AT4G39880| ribosomal protein L23 family protein	Unigene10179_All//2.00E-26//TC146980			GO:0005198//GO:0005402//GO:0005488//GO:0006810//GO:0010467//GO:0012505//GO:0022613//GO:0030529//GO:0031224	nr -
Unigene1018_All	1337	50.7946	20.3133	31.3446	68.108	35.7488	16.0791	10.4356	4.4703	2.205	-1.3223	9.3676e-77	Down	-0.6965	6.9169e-26		-0.9299	6.322e-72		-2.0826	1.1727e-213	Down	-1.2231	1.0422e-17	Down	-2.2427	3.9776e-42	Down	Unigene1018_All//gi|297725701|ref|NP_001175214.1|//1.00E-11//Os07g0501200 [Oryza sativa Japonica Group] >gi|255677791|dbj|BAH93942.1| Os07g0501200 [Oryza sativa Japonica Group]	Unigene1018_All//3.00E-07//AT4G29090| reverse transcriptase, putative / RNA-dependent DNA polymerase, putative	Unigene1018_All//3.00E-91//TC135736				nr +
Unigene10181_All	827	0	9.4354	4.2497	0	0	0	0	0	0	13.2039	1.263e-44	Up	12.0531	1.8756e-19	Up	null	null		null	null		null	null		null	null		Unigene10181_All//gi|226502788|ref|NP_001148944.1|//1.00E-48//nascent polypeptide-associated complex alpha subunit-like protein [Zea mays] >gi|195623512|gb|ACG33586.1| nascent polypeptide-associated complex alpha subunit-like protein [Zea mays]	Unigene10181_All//1.00E-32//AT3G49470| NACA2 (NASCENT POLYPEPTIDE-ASSOCIATED COMPLEX SUBUNIT ALPHA-LIKE PROTEIN 2)				GO:0006970	nr -
Unigene101816_All	208	0.2515	0	1.28	1.1975	0.3311	1.3028	0	2.6122	0.3831	-7.9744	0.62278		2.3475	0.23978		-1.8547	0.2757		0.1216	0.9447		11.351	0.00053662	Up	8.5816	0.4067
Unigene101818_All	234	7.6022	3.6811	13.8814	2.1288	1.7659	4.2461	2.5296	11.2527	3.7455	-1.0463	0.033855		0.8687	0.015627		-0.2696	0.8023		0.9961	0.17191		2.1533	6.9234e-08	Up	0.5662	0.38481				Unigene101818_All//6.00E-42//TC156918
Unigene10183_All	603	0	0	0	0	0	0	6.5208	1.6635	2.1142	null	null		null	null		null	null		null	null		-1.9708	2.6026e-10	Down	-1.6249	2.1613e-08	Down	Unigene10183_All//gi|21322711|emb|CAD22154.1|//9.00E-53//pherophorin-dz1 protein [Volvox carteri f. nagariensis]				ko03040|Spliceosome	GO:0044464	nr +
Unigene10185_All	666	0	0	0	0	0	0.2713	2.7298	6.0246	2.5123	null	null		null	null		null	null		8.0837	0.19586		1.1421	3.7618e-05	Up	-0.1198	0.77138		Unigene10185_All//gi|224096718|ref|XP_002310710.1|//6.00E-88//2-oxoglutarate-dependent dioxygenase [Populus trichocarpa] >gi|222853613|gb|EEE91160.1| 2-oxoglutarate-dependent dioxygenase [Populus trichocarpa]	Unigene10185_All//9.00E-79//AT3G50210| 2-oxoacid-dependent oxidase, putative			ko00270|Cysteine and methionine metabolism	GO:0008152//GO:0016706//GO:0031669//GO:0032502//GO:0046914	nr -
Unigene10187_All	437	1.0775	0.2319	1.3404	6.6115	5.3584	2.6871	0.1935	0.7651	1.2763	-2.2161	0.077675		0.315	0.71898		-0.3032	0.44395		-1.2989	0.00047638	Down	1.9833	0.14462		2.7216	0.009385		Unigene10187_All//gi|24461861|gb|AAN62348.1|AF506028_15//5.00E-31//NBS-LRR type disease resistance protein [Citrus trifoliata]	Unigene10187_All//8.00E-22//AT5G63020| disease resistance protein (CC-NBS-LRR class), putative	Unigene10187_All//6.00E-136//DR461626		ko04626|Plant-pathogen interaction	GO:0005488//GO:0016787	nr +
Unigene10188_All	459	0	12.5846	9.281	0	0	0	0.1842	0	0	13.6194	5.7926e-33	Up	13.1801	1.2196e-23	Up	null	null		null	null		-7.5251	0.40853		-7.5251	0.36232		Unigene10188_All//gi|15229631|ref|NP_190560.1|//1.00E-48//60S ribosomal protein L26 (RPL26A) [Arabidopsis thaliana] >gi|297816242|ref|XP_002876004.1| 60S ribosomal protein L26 [Arabidopsis lyrata subsp. lyrata] >gi|27735242|sp|P51414.2|RL261_ARATH RecName: Full=60S ribosomal protein L26-1 >gi|6723436|emb|CAB66929.1| 60S RIBOSOMAL PROTEIN-like [Arabidopsis thaliana] >gi|297321842|gb|EFH52263.1| 60…	Unigene10188_All//4.00E-41//AT3G49910| 60S ribosomal protein L26 (RPL26A)			ko03010|Ribosome	GO:0005198//GO:0006950//GO:0009536//GO:0010467//GO:0015934//GO:0016020//GO:0031981	nr +
Unigene10191_All	445	0	0	0	0	0	0	1.4252	8.2652	4.4763	null	null		null	null		null	null		null	null		2.5359	6.9529e-13	Up	1.6511	0.00010819	Up
Unigene10192_All	672	0.1557	15.3064	7.6864	0	0	0	0	0	0	6.6192	2.9742e-55	Up	5.6255	1.1174e-25	Up	null	null		null	null		null	null		null	null		Unigene10192_All//gi|585238|sp|Q08864.3|H11_VOLCA//6.00E-25//RecName: Full=Histone H1-I >gi|349585|gb|AAA74723.1| histone H1-I [Volvox carteri] >gi|300267026|gb|EFJ51211.1| histone H1 [Volvox carteri f. nagariensis]	Unigene10192_All//2.00E-05//AT3G18035| HON4; DNA binding					nr +
Unigene10193_All	642	2.1189	0.5525	0.9953	10.3198	8.6893	7.1755	7.0467	4.5572	1.9237	-1.9393	0.0021763		-1.0901	0.074773		-0.2481	0.31166		-0.5243	0.022242		-0.6288	0.013123		-1.8731	1.9987e-11	Down	Unigene10193_All//gi|79499196|ref|NP_195518.2|//3.00E-21//transmembrane transporter [Arabidopsis thaliana] >gi|75128428|sp|Q6SZ87.1|NAT11_ARATH RecName: Full=Nucleobase-ascorbate transporter 11; Short=AtNAT11 >gi|38350521|gb|AAR18373.1| nucleobase-ascorbate transporter 11 [Arabidopsis thaliana]	Unigene10193_All//6.00E-21//AT4G38050| transmembrane transporter				GO:0005215//GO:0006810//GO:0016020	nr +
Unigene101932_All	249	0	6.1048	0	0.8002	1.6595	2.5393	0.6792	1.0071	1.44	12.5757	1.0979e-08	Up	null	null		1.0523	0.42603		1.666	0.09798		0.5683	0.6747		1.0842	0.34981				Unigene101932_All//1.00E-58//gi|164243022|gb|ES823910.1|ES823910
Unigene10196_All	312	1.1739	12.8298	4.2668	5.4285	3.3111	2.4608	2.0327	1.8754	2.043	3.4501	2.8196e-15	Up	1.8618	0.0048609		-0.7132	0.14813		-1.1414	0.024962		-0.1162	0.88771		0.0073	0.99519				Unigene10196_All//2.00E-11//TC153817
Unigene101960_All	220	0	1.3819	0	0.6793	0.1565	0.8212	0.7687	1.1399	8.1488	10.4324	0.044502		null	null		-2.1179	0.38785		0.2737	0.90585		0.5684	0.67469		3.4061	8.0407e-09	Up	Unigene101960_All//gi|297806781|ref|XP_002871274.1|//3.00E-08//predicted protein [Arabidopsis lyrata subsp. lyrata] >gi|297317111|gb|EFH47533.1| predicted protein [Arabidopsis lyrata subsp. lyrata]	Unigene101960_All//1.00E-09//AT5G07490| unknown protein					nr -
Unigene101985_All	271	0.9653	1.6827	0.5895	0.7353	1.2707	1.4999	10.6091	8.791	1.4701	0.8017	0.46036		-0.7115	0.62222		0.7892	0.59608		1.0285	0.42875		-0.2712	0.44733		-2.8513	5.7557e-12	Down			Unigene101985_All//3.00E-69//TC172050
Unigene10199_All	717	0.073	12.2964	7.3525	0	0	0	0	0	0	7.3961	1.5412e-48	Up	6.6542	1.1686e-27	Up	null	null		null	null		null	null		null	null		Unigene10199_All//gi|160895838|ref|YP_001561420.1|//2.00E-65//elongation factor Tu [Delftia acidovorans SPH-1] >gi|160361422|gb|ABX33035.1| translation elongation factor Tu [Delftia acidovorans SPH-1]	Unigene10199_All//3.00E-50//AT4G20360| ATRABE1B (ARABIDOPSIS RAB GTPASE HOMOLOG E1B); GTP binding / GTPase/ translation elongation factor	Unigene10199_All//6.00E-11//EX172631		ko04626|Plant-pathogen interaction	GO:0006412//GO:0008135//GO:0009536//GO:0016772//GO:0017111//GO:0032561	nr +
Unigene102_All	1463	3.3975	3.0478	1.4923	2.9963	2.9422	2.6549	2.8033	2.314	1.3071	-0.1567	0.60434		-1.1869	3.5634e-05	Down	-0.0263	0.93469		-0.1745	0.62385		-0.2767	0.35203		-1.1008	3.371e-05	Down	Unigene102_All//gi|297798410|ref|XP_002867089.1|//1.00E-150//transducin family protein [Arabidopsis lyrata subsp. lyrata] >gi|297312925|gb|EFH43348.1| transducin family protein [Arabidopsis lyrata subsp. lyrata]	Unigene102_All//4.00E-148//AT4G35140| transducin family protein / WD-40 repeat family protein	Unigene102_All//0.00E+00//gi|84164480|gb|DR453128.1|DR453128				nr +
Unigene1020_All	1402	8.8445	20.3834	16.7498	22.2778	42.4178	51.896	51.3876	96.8576	22.4199	1.2045	3.2285e-28	Up	0.9213	9.1446e-15		0.9291	3.7876e-45		1.22	1.3131e-77	Up	0.9144	4.6262e-103		-1.1966	1.3723e-87	Down	Unigene1020_All//gi|79521554|ref|NP_197973.2|//3.00E-96//catalytic/ protein serine/threonine phosphatase [Arabidopsis thaliana] >gi|226739226|sp|Q9XGZ9.2|P2C72_ARATH RecName: Full=Probable protein phosphatase 2C 72; Short=AtPP2C72	Unigene1020_All//2.00E-92//AT5G26010| catalytic/ protein serine/threonine phosphatase	Unigene1020_All//0.00E+00//TC156152			GO:0003824	nr -
Unigene10200_All	523	0	26.2551	6.5163	0	0.3951	0	0	0	0	14.6803	7.8042e-79	Up	12.6698	7.3924e-19	Up	8.6261	0.15753		null	null		null	null		null	null		Unigene10200_All//gi|298711973|emb|CBJ32915.1|//6.00E-25//ribosomal protein L35 [Ectocarpus siliculosus]	Unigene10200_All//7.00E-24//AT1G74270| 60S ribosomal protein L35a (RPL35aC)			ko03010|Ribosome	GO:0043231	nr -
Unigene10201_All	1255	0.2501	4.4411	2.7155	0.3969	0.5762	0.4318	0.438	0.2331	0.3174	4.1503	3.205e-24	Up	3.4406	1.2959e-12	Up	0.5378	0.56432		0.1216	0.92102		-0.91	0.31902		-0.4646	0.59716		Unigene10201_All//gi|71905515|gb|AAZ52735.1|//7.00E-94//expressed protein [Arabidopsis thaliana]	Unigene10201_All//4.00E-90//AT4G12680| unknown protein	Unigene10201_All//0.00E+00//CO131664			GO:0003006//GO:0031410	nr +
Unigene10202_All	740	0	0	0	0	0	0	2.971	0.5648	3.9839	null	null		null	null		null	null		null	null		-2.3951	1.5479e-07	Down	0.4232	0.19265		Unigene10202_All//gi|224077026|ref|XP_002305098.1|//2.00E-68//AP2/ERF domain-containing transcription factor [Populus trichocarpa] >gi|222848062|gb|EEE85609.1| AP2/ERF domain-containing transcription factor [Populus trichocarpa]	Unigene10202_All//1.00E-26//AT4G18450| ethylene-responsive factor, putative	Unigene10202_All//1.00E-08//TC178583	AP2-EREBP		GO:0006350//GO:0010033//GO:0010468//GO:0043231	nr +
Unigene102075_All	420	61.4147	49.9456	55.2786	5.8117	8.7728	6.7745	3.2213	1.6917	0.7588	-0.2982	0.0062619		-0.1519	0.22295		0.5941	0.063993		0.2212	0.62652		-0.9292	0.073646		-2.0859	0.00018493	Down	Unigene102075_All//gi|47155380|dbj|BAD18925.1|//2.00E-30//ferredoxin [Codonopsis lanceolata]	Unigene102075_All//2.00E-31//AT2G04700| ferredoxin thioredoxin reductase catalytic beta chain family protein	Unigene102075_All//4.00E-171//gi|109867808|gb|DW496784.1|DW496784			GO:0008152//GO:0009536//GO:0016731//GO:0043169//GO:0051536	nr +
Unigene10208_All	501	0	11.0239	2.232	0	0	0	0	0	0	13.4283	1.6615e-31	Up	11.1241	3.4364e-06	Up	null	null		null	null		null	null		null	null		Unigene10208_All//sp|P08285|H103_CHICK//4.00E-06//Histone H1.03 OS=Gallus gallus PE=3 SV=2						swissprot +
Unigene1021_All	3759	9.2421	5.6479	6.998	19.4009	16.6543	16.1838	34.9917	15.6776	18.5998	-0.7105	1.2974e-14		-0.4013	1.9765e-05		-0.2202	0.00014715		-0.2616	1.2689e-05		-1.1583	4.0364e-147	Down	-0.9117	3.1783e-102		Unigene1021_All//gi|15228737|ref|NP_191795.1|//0.00E+00//carbohydrate binding [Arabidopsis thaliana]	Unigene1021_All//0.00E+00//AT3G62360| carbohydrate binding	Unigene1021_All//0.00E+00//TC179301			GO:0005488//GO:0005618//GO:0008238//GO:0016020//GO:0031410//GO:0043231	nr +
Unigene10210_All	778	0.4035	0.9118	0.1369	0	0.2213	0	1.0325	11.6577	2.1507	1.1761	0.17499		-1.5594	0.33043		7.7899	0.2278		null	null		3.4971	3.0738e-42	Up	1.0587	0.016702		Unigene10210_All//gi|229609807|gb|ACQ83519.1|//6.00E-20//CBL-interacting protein kinase 03 [Vitis vinifera]	Unigene10210_All//4.00E-15//AT4G30960| SIP3 (SOS3-INTERACTING PROTEIN 3); ATP binding / kinase/ protein kinase/ protein serine/threonine kinase	Unigene10210_All//6.00E-85//TC133167			GO:0004674//GO:0006464//GO:0006972//GO:0009926//GO:0023060//GO:0032501//GO:0032502//GO:0032559//GO:0046872	nr +
Unigene102112_All	480	1.417	0	0.3328	4.3587	1.4348	0.5645	0.3523	0	0.498	-10.4686	0.00041003	Down	-2.0901	0.043775		-1.603	0.00020413	Down	-2.9489	9.2669e-08	Down	-8.4607	0.13538		0.4993	0.708		Unigene102112_All//gi|115446245|ref|NP_001046902.1|//1.00E-14//Os02g0502500 [Oryza sativa Japonica Group] >gi|113536433|dbj|BAF08816.1| Os02g0502500 [Oryza sativa Japonica Group]	Unigene102112_All//6.00E-06//AT2G40980| LOCATED IN: plasma membrane; EXPRESSED IN: 22 plant structures; EXPRESSED DURING: 13 growth stages; CONTAINS InterPro DOMAIN/s: Protein kinase-like (InterPro:IPR011009); Has 152 Blast hits to 139 proteins in 56 species: Archae - 0; Bacteria - 74; Metazoa - 0; Fungi - 0; Plants - 60; Viruses - 0; Other Eukaryotes - 18 (source: NCBI BLink).					nr -
Unigene10213_All	796	0	1.0185	0.1338	0.0626	0.0433	0.1135	0.8499	3.0979	30.0291	9.9922	9.3877e-05	Up	7.0639	0.40326		-0.5318	0.82969		0.8585	0.79754		1.8659	2.6409e-06	Up	5.1429	8.5833e-146	Up	Unigene10213_All//gi|224139556|ref|XP_002323167.1|//2.00E-09//ABC transporter family protein [Populus trichocarpa] >gi|222867797|gb|EEF04928.1| ABC transporter family protein [Populus trichocarpa]		Unigene10213_All//0.00E+00//DT463777				nr +
Unigene10215_All	575	0	0	0	0	0	0	2.4265	1.8899	0.3464	null	null		null	null		null	null		null	null		-0.3606	0.50524		-2.8084	4.2555e-06	Down	Unigene10215_All//gi|116222231|gb|ABJ80979.1|//8.00E-95//alpha tubulin [Porphyra yezoensis]	Unigene10215_All//1.00E-84//AT5G19780| TUA5; structural constituent of cytoskeleton	Unigene10215_All//5.00E-48//TC142299		ko04145|Phagosome	GO:0007017//GO:0015630//GO:0017111//GO:0032561//GO:0032991//GO:0043623	nr -
Unigene10216_All	636	0	0	0	0	0	0	4.454	4.7316	0.0626	null	null		null	null		null	null		null	null		0.0872	0.79989		-6.1528	2.6466e-19	Down	Unigene10216_All//gi|297844300|ref|XP_002890031.1|//2.00E-50//eukaryotic translation initiation factor 5A-1 [Arabidopsis lyrata subsp. lyrata] >gi|297335873|gb|EFH66290.1| eukaryotic translation initiation factor 5A-1 [Arabidopsis lyrata subsp. lyrata]	Unigene10216_All//1.00E-50//AT1G13950| ELF5A-1 (EUKARYOTIC ELONGATION FACTOR 5A-1); translation initiation factor	Unigene10216_All//8.00E-07//EX164461			GO:0006448//GO:0006449//GO:0008135//GO:0010087//GO:0018205//GO:0043021	nr -
Unigene102186_All	206	0.508	1.4758	0	2.4182	0	2.6309	0.4105	0.4058	0	1.5386	0.32367		-8.9887	0.39998		-11.2397	0.00089887	Down	0.1216	0.92101		-0.0166	1.0165		-8.6812	0.36224				Unigene102186_All//2.00E-10//DW517741
Unigene102197_All	486	0.1077	0	0	0.3075	0.4251	2.2303	0.522	0	2.3772	-6.7509	0.62253		-6.7509	0.63539		0.4672	0.82588		2.8586	0.00049757	Up	-9.0279	0.040647		2.1871	0.00048139	Up	Unigene102197_All//gi|300507131|gb|ADK23941.1|//5.00E-43//KASIII [Gossypium hirsutum]	Unigene102197_All//1.00E-36//AT1G62640| KAS III (3-KETOACYL-ACYL CARRIER PROTEIN SYNTHASE III); 3-oxoacyl-[acyl-carrier-protein] synthase/ catalytic/ transferase, transferring acyl groups other than amino-acyl groups	Unigene102197_All//4.00E-116//gi|48815960|gb|CO117273.1|CO117273		ko00061|Fatty acid biosynthesis	GO:0004312//GO:0006631	nr -
Unigene1022_All	3085	4.9353	4.7467	8.3543	12.4495	17.2232	9.8818	1.5487	6.056	1.1364	-0.0562	0.71775		0.7594	8.7953e-12		0.4683	2.0827e-12		-0.3332	8.2785e-05		1.9673	5.2416e-46	Up	-0.4466	0.063318		Unigene1022_All//gi|1321686|emb|CAA66376.1|//0.00E+00//light repressible receptor protein kinase [Arabidopsis thaliana]	Unigene1022_All//2.00E-178//AT4G29990| light repressible receptor protein kinase			ko04626|Plant-pathogen interaction	GO:0000166//GO:0004672	nr +
Unigene10221_All	334	0.7832	0.4551	0.3189	0.2983	1.031	0.6761	0	0	2.2663	-0.7832	0.62029		-1.2963	0.43678		1.7892	0.25776		1.1805	0.55036		null	null		11.1461	1.3917e-05	Up			Unigene10221_All//4.00E-07//TC142752
Unigene10223_All	701	0	0	0	0	0	0	4.3426	5.4257	0	null	null		null	null		null	null		null	null		0.3213	0.28658		-12.0843	2.1632e-22	Down	Unigene10223_All//gi|115445597|ref|NP_001046578.1|//6.00E-81//Os02g0287000 [Oryza sativa Japonica Group] >gi|113536109|dbj|BAF08492.1| Os02g0287000 [Oryza sativa Japonica Group]	Unigene10223_All//9.00E-80//AT4G34670| 40S ribosomal protein S3A (RPS3aB)			ko03010|Ribosome	GO:0005198//GO:0010467//GO:0030529	nr -
Unigene10226_All	711	0	71.9064	36.0991	0	0	0	0	0	0	16.1338	2.2992e-295	Up	15.1397	2.5082e-145	Up	null	null		null	null		null	null		null	null		Unigene10226_All//gi|57471708|gb|AAW50985.1|//2.00E-61//ribosomal protein L18 [Triticum aestivum]	Unigene10226_All//2.00E-57//AT3G05590| RPL18 (RIBOSOMAL PROTEIN L18); structural constituent of ribosome			ko03010|Ribosome	GO:0005198//GO:0010467//GO:0030529	nr -
Unigene10227_All	473	0.7743	0.3214	0	1.8957	1.8928	1.8142	2.6816	0.3535	3.5375	-1.2685	0.33589		-9.5967	0.027875		-0.0022	0.9777		-0.0634	0.93889		-2.9233	1.4606e-05	Down	0.3996	0.37816
Unigene10229_All	254	2.8838	0	0.4193	2.5495	1.898	3.5562	0.3329	0.4937	0.1568	-11.4938	0.00021119	Down	-2.7819	0.010453		-0.4257	0.60859		0.4801	0.54984		0.5685	0.78342		-1.0862	0.67834
Unigene102296_All	210	0.2491	0	0	4.9814	3.2796	0.2151	0	0	0	-7.9606	0.62248		-7.9606	0.6353		-0.603	0.36679		-4.5335	1.6009e-05	Down	null	null		null	null				Unigene102296_All//2.00E-29//gi|164354102|gb|ES849373.1|ES849373
Unigene1023_All	1442	8.5629	4.8139	5.8346	10.2254	8.4297	5.8568	3.6944	1.0724	0.3868	-0.8309	3.0501e-07		-0.5535	0.00091502		-0.2786	0.058718		-0.804	1.6613e-08		-1.7845	4.3407e-12	Down	-3.2557	1.8504e-24	Down	Unigene1023_All//gi|297791827|ref|XP_002863798.1|//2.00E-73//binding protein [Arabidopsis lyrata subsp. lyrata] >gi|297309633|gb|EFH40057.1| binding protein [Arabidopsis lyrata subsp. lyrata]	Unigene1023_All//2.00E-59//AT5G42340| binding / ubiquitin-protein ligase	Unigene1023_All//0.00E+00//TC179266			GO:0019787//GO:0032446//GO:0043234//GO:0044424	nr +
Unigene10230_All	691	0	53.8225	27.3571	0	0	0	0	0	0	15.7159	1.2886e-214	Up	14.7396	8.8276e-107	Up	null	null		null	null		null	null		null	null		Unigene10230_All//gi|297812211|ref|XP_002873989.1|//2.00E-69//ribosomal protein S8 [Arabidopsis lyrata subsp. lyrata] >gi|297319826|gb|EFH50248.1| ribosomal protein S8 [Arabidopsis lyrata subsp. lyrata]	Unigene10230_All//5.00E-62//AT5G20290| 40S ribosomal protein S8 (RPS8A)			ko03010|Ribosome	GO:0005198//GO:0009536//GO:0010467//GO:0015935//GO:0016020//GO:0022613//GO:0030312//GO:0031981	nr -
Unigene10232_All	521	1.4059	0.9725	0	2.8684	3.0404	0.3467	0.8927	0.1604	0	-0.5317	0.51262		-10.4573	0.00041327	Down	0.084	0.89553		-3.0485	7.4197e-06	Down	-2.4765	0.033847		-9.802	0.0010975				Unigene10232_All//3.00E-15//DR454672
Unigene10234_All	314	0.1666	2.5819	0	1.9037	1.7547	1.726	1.4812	0.9318	1.1419	3.954	0.00075208	Up	-7.3802	0.63528		-0.1176	0.87566		-0.1414	0.87951		-0.6687	0.5088		-0.3753	0.66492		Unigene10234_All//gi|17979268|gb|AAL49950.1|//3.00E-10//At1g22970/F19G10_8 [Arabidopsis thaliana] >gi|21700855|gb|AAM70551.1| At1g22970/F19G10_8 [Arabidopsis thaliana]	Unigene10234_All//1.00E-11//AT1G22970| unknown protein	Unigene10234_All//2.00E-113//CO097471				nr -
Unigene102349_All	209	0.751	5.5761	3.3122	1.1917	0.9886	3.2414	120.974	99.1899	62.3313	2.8924	0.00029795	Up	2.1409	0.036689		-0.2696	0.82327		1.4436	0.12841		-0.2864	0.0036986		-0.9567	5.1576e-22				Unigene102349_All//6.00E-45//gi|109867479|gb|DW496455.1|DW496455
Unigene10236_All	804	0	0	0	0	0	0	13.0942	14.8676	1.6352	null	null		null	null		null	null		null	null		0.1832	0.26178		-3.0014	4.1809e-44	Down	Unigene10236_All//gi|238014838|gb|ACR38454.1|//1.00E-14//unknown [Zea mays]		Unigene10236_All//9.00E-38//TC146753				nr -
Unigene10239_All	698	0	9.1466	5.0351	0	0	0	0	0	0	13.159	1.8458e-36	Up	12.2978	1.875e-19	Up	null	null		null	null		null	null		null	null								ESTscan -
Unigene1024_All	2200	20.3576	5.3664	7.8181	20.3785	19.0333	11.5782	5.5925	1.2159	1.3038	-1.9235	4.4297e-87	Down	-1.3807	2.2311e-52	Down	-0.0985	0.2923		-0.8156	3.2246e-25		-2.2015	2.8391e-35	Down	-2.1008	2.3345e-34	Down	Unigene1024_All//gi|297791827|ref|XP_002863798.1|//0.00E+00//binding protein [Arabidopsis lyrata subsp. lyrata] >gi|297309633|gb|EFH40057.1| binding protein [Arabidopsis lyrata subsp. lyrata]	Unigene1024_All//0.00E+00//AT5G42340| binding / ubiquitin-protein ligase	Unigene1024_All//0.00E+00//TC179266		ko04141|Protein processing in endoplasmic reticulum//ko04120|Ubiquitin mediated proteolysis	GO:0019787//GO:0032446//GO:0043231//GO:0043234	nr +
Unigene10241_All	790	0	50.2205	19.7497	0	0	0	0	0	0	15.616	5.33e-229	Up	14.2695	5.589e-88	Up	null	null		null	null		null	null		null	null		Unigene10241_All//sp|P92201|LCP8_DROME//5.00E-26//Larval cuticle protein 8 OS=Drosophila melanogaster GN=Lcp65Ag1 PE=1 SV=1						swissprot -
Unigene10242_All	517	0	12.8389	6.9009	0	0	0	0	0	0	13.6482	6.4315e-38	Up	12.7526	9.4217e-20	Up	null	null		null	null		null	null		null	null		Unigene10242_All//sp|P56562|CUD5_SCHGR//2.00E-10//Endocuticle structural glycoprotein SgAbd-5 OS=Schistocerca gregaria PE=1 SV=1						swissprot -
Unigene10243_All	275	0.3805	0.3685	0	1.4491	0.8765	1.4781	6.6111	3.3437	21.875	-0.0462	0.99124		-8.5718	0.39991		-0.7253	0.54667		0.0286	0.98526		-0.9834	0.023206		1.7263	2.8962e-13	Up			Unigene10243_All//4.00E-25//gi|164363055|gb|ES820462.1|ES820462
Unigene102458_All	289	7.0606	4.3832	2.2111	13.7894	9.6514	9.3765	32.1856	33.6969	26.4672	-0.6878	0.12686		-1.675	0.00089307	Down	-0.5147	0.084902		-0.5564	0.072841		0.0662	0.72657		-0.2822	0.097984		Unigene102458_All//gi|45861745|gb|AAS78671.1|//1.00E-23//actin [Capsicum annuum]	Unigene102458_All//1.00E-23//AT5G59370| ACT4 (ACTIN 4); structural constituent of cytoskeleton	Unigene102458_All//3.00E-84//TC171105		ko04145|Phagosome	GO:0032559//GO:0043232	nr +
Unigene10247_All	405	0	4.2537	1.9722	0	0	0	0	0	0	12.0545	7.9968e-10	Up	10.9456	0.00017247	Up	null	null		null	null		null	null		null	null
Unigene10248_All	675	0	23.4956	10.3344	0	0	0	0	0	0	14.5201	3.9935e-91	Up	13.3352	5.7335e-39	Up	null	null		null	null		null	null		null	null		Unigene10248_All//gi|24061807|gb|AAN39804.1|//5.00E-11//transferrin-like protein IDI-100 [Dunaliella salina]						nr -
Unigene10249_All	281	0	0	0	0	0	0	12.9398	4.6109	7.514	null	null		null	null		null	null		null	null		-1.4887	9.8424e-07	Down	-0.7842	0.0046721		Unigene10249_All//gi|117607067|gb|ABK42077.1|//9.00E-39//ubiquitin extension protein [Capsicum annuum]	Unigene10249_All//2.00E-21//AT3G62250| UBQ5 (ubiquitin 5); protein binding / structural constituent of ribosome	Unigene10249_All//3.00E-07//ES818268		ko03010|Ribosome	GO:0005198//GO:0005488//GO:0010467//GO:0015935//GO:0016567//GO:0019941	nr +
Unigene1025_All	2394	3.7372	4.6563	1.4013	8.5729	10.6585	12.036	7.0467	2.6188	3.7442	0.3172	0.071289		-1.4152	2.7656e-11	Down	0.3141	0.0026524		0.4895	5.9294e-07		-1.428	9.4019e-27	Down	-0.9123	6.589e-14		Unigene1025_All//gi|297791827|ref|XP_002863798.1|//1.00E-166//binding protein [Arabidopsis lyrata subsp. lyrata] >gi|297309633|gb|EFH40057.1| binding protein [Arabidopsis lyrata subsp. lyrata]	Unigene1025_All//7.00E-154//AT5G42340| binding / ubiquitin-protein ligase	Unigene1025_All//0.00E+00//TC147579		ko04141|Protein processing in endoplasmic reticulum//ko04120|Ubiquitin mediated proteolysis		nr -
Unigene10250_All	619	0	9.2498	3.7851	0	0.0556	0	0	0	0	13.1752	1.1322e-32	Up	11.8861	6.4115e-13	Up	5.797	0.84141		null	null		null	null		null	null		Unigene10250_All//gi|261853464|gb|ACY00391.1|//9.00E-27//calmodulin [Polygonum sibiricum]	Unigene10250_All//5.00E-22//AT5G37780| CAM1 (CALMODULIN 1); calcium ion binding			ko04626|Plant-pathogen interaction//ko04070|Phosphatidylinositol signaling system	GO:0005488//GO:0019932	nr -
Unigene10251_All	456	0	0.1111	0.2336	0.2185	0	0.5943	1.7617	1.7415	64.301	6.7957	0.62333		7.8679	0.40318		-7.7715	0.318		1.4436	0.40987		-0.0166	1.018		5.1898	1.3706e-179	Up	Unigene10251_All//gi|224061172|ref|XP_002300362.1|//5.00E-26//multidrug resistance protein ABC transporter family [Populus trichocarpa] >gi|222847620|gb|EEE85167.1| multidrug resistance protein ABC transporter family [Populus trichocarpa]	Unigene10251_All//7.00E-10//AT3G13100| ATMRP7; ATPase, coupled to transmembrane movement of substances	Unigene10251_All//6.00E-96//TC157562			GO:0009607//GO:0016020//GO:0017111	nr +
Unigene102510_All	318	14.6433	35.373	7.8703	23.0273	21.7657	19.3152	12.7638	17.3492	7.1409	1.2724	1.5737e-12	Up	-0.8958	0.0021663		-0.0813	0.76868		-0.2536	0.29336		0.4428	0.055463		-0.8379	0.0013381				Unigene102510_All//1.00E-105//TC167368
Unigene102517_All	339	2.4694	0.1495	0.4712	0.2939	0.8126	0.2665	2.3697	2.096	1.6453	-4.0459	0.00046555	Down	-2.3897	0.011443		1.4672	0.42029		-0.1412	0.95351		-0.1771	0.79295		-0.5264	0.43457		Unigene102517_All//gi|226499554|ref|NP_001149976.1|//1.00E-10//SAM domain family protein [Zea mays] >gi|195635833|gb|ACG37385.1| SAM domain family protein [Zea mays]	Unigene102517_All//3.00E-10//AT1G70180| sterile alpha motif (SAM) domain-containing protein	Unigene102517_All//7.00E-95//TC167190			GO:0006464//GO:0016301//GO:0032559	nr -
Unigene10252_All	455	0	1.8931	2.1066	0	0	0	0	0	0	10.8865	4.9491e-05	Up	11.0407	2.4604e-05	Up	null	null		null	null		null	null		null	null								ESTscan -
Unigene10254_All	574	0	2.3834	3.247	0	0	0	0	0	0	11.2188	7.802e-08	Up	11.6649	2.8945e-10	Up	null	null		null	null		null	null		null	null		Unigene10254_All//gi|116060285|emb|CAL55621.1|//1.00E-05//Myosin class II heavy chain (ISS) [Ostreococcus tauri]	Unigene10254_All//7.00E-05//AT5G41790| CIP1 (COP1-INTERACTIVE PROTEIN 1); protein binding					nr -
Unigene102563_All	403	0.2597	6.1608	0.2643	0	0.1709	0.8965	0	0	0	4.5682	1.1637e-11	Up	0.0253	1.0022		7.417	0.61697		9.8082	0.023791		null	null		null	null		Unigene102563_All//gi|5031277|gb|AAD38144.1|AF139497_1//4.00E-26//homeobox leucine zipper protein [Prunus armeniaca]	Unigene102563_All//6.00E-25//AT2G46680| ATHB-7 (ARABIDOPSIS THALIANA HOMEOBOX 7); transcription activator/ transcription factor	Unigene102563_All//2.00E-142//ES813725	HB		GO:0001071//GO:0003677//GO:0006351//GO:0006970//GO:0009755//GO:0010468//GO:0010557//GO:0030528//GO:0043231	nr +
Unigene102572_All	210	0	3.1367	1.0143	2.6093	1.4758	3.8711	1.0067	0.9951	0.3794	11.615	0.00062602	Up	9.9863	0.14208		-0.8222	0.3962		0.5691	0.49622		-0.0167	1.0232		-1.4078	0.38081
Unigene102582_All	298	0	0.5101	0	0	0	0.9093	0.4256	6.8725	2.9411	8.9946	0.23685		null	null		null	null		9.8286	0.070633		4.0133	5.2897e-11	Up	2.7888	0.00053704	Up			Unigene102582_All//6.00E-46//DN799979
Unigene102587_All	243	0	0	0	0.205	0	0	5.0458	0.172	0.1639	null	null		null	null		-7.6795	0.56581		-7.6795	0.64653		-4.8746	1.4851e-07	Down	-4.9442	6.142e-08	Down	Unigene102587_All//gi|224140739|ref|XP_002323736.1|//3.00E-06//predicted protein [Populus trichocarpa] >gi|222866738|gb|EEF03869.1| predicted protein [Populus trichocarpa]		Unigene102587_All//5.00E-24//TC148715				nr +
Unigene102591_All	297	0.1762	0	0	0.5032	1.3913	3.4975	0.7118	0	0	-7.4611	0.62233		-7.4611	0.63516		1.4672	0.27964		2.7971	0.00081269	Up	-9.4753	0.074845		-9.4753	0.058371		Unigene102591_All//gi|15809986|gb|AAL06920.1|//2.00E-34//AT3g19540/T31J18_4 [Arabidopsis thaliana] >gi|22137022|gb|AAM91356.1| At3g19540/T31J18_4 [Arabidopsis thaliana]	Unigene102591_All//9.00E-36//AT3G19540| unknown protein	Unigene102591_All//9.00E-51//gi|78336860|gb|DT557134.1|DT557134			GO:0016020	nr -
Unigene10260_All	801	0	0.253	0	0.1244	0	0.0564	3.8533	0.2609	2.3873	7.983	0.13751		null	null		-6.9588	0.31796		-1.1412	0.67924		-3.8845	4.9877e-16	Down	-0.6907	0.023304		Unigene10260_All//gi|224094005|ref|XP_002310060.1|//3.00E-45//cytochrome P450 [Populus trichocarpa] >gi|222852963|gb|EEE90510.1| cytochrome P450 [Populus trichocarpa]	Unigene10260_All//3.00E-29//AT3G26280| CYP71B4; electron carrier/ heme binding / iron ion binding / monooxygenase/ oxygen binding	Unigene10260_All//4.00E-92//CO098968		ko00945|Stilbenoid, diarylheptanoid and gingerol biosynthesis//ko00903|Limonene and pinene degradation	GO:0005506//GO:0008152//GO:0016709	nr +
Unigene10261_All	408	0	0.4968	4.568	0.8547	1.1816	0.1107	0.4145	0.2049	0	8.9565	0.13751		12.1573	2.894e-10	Up	0.4673	0.70422		-2.9488	0.083085		-1.0165	0.61569		-8.6952	0.10905				Unigene10261_All//1.00E-07//CA993990
Unigene102612_All	200	0	0	0	0	0	0	1.9026	9.822	6.9718	null	null		null	null		null	null		null	null		2.368	1.0491e-06	Up	1.8736	0.00049674	Up
Unigene10262_All	338	0	5.5467	2.5207	0	0	0	0	0	0	12.4374	1.1065e-10	Up	11.2996	9.0353e-05	Up	null	null		null	null		null	null		null	null		Unigene10262_All//gi|219112151|ref|XP_002177827.1|//1.00E-33//predicted protein [Phaeodactylum tricornutum CCAP 1055/1] >gi|217410712|gb|EEC50641.1| predicted protein [Phaeodactylum tricornutum CCAP 1055/1]					GO:0003824	nr +
Unigene102629_All	363	0	0	0	0	0.0949	0.2488	0.2329	0	2.634	null	null		null	null		6.5683	0.84135		7.9588	0.48268		-7.8636	0.40835		3.4995	4.2915e-05	Up	Unigene102629_All//gi|75755957|gb|ABA27034.1|//1.00E-11//TO66-1 [Taraxacum officinale]	Unigene102629_All//3.00E-10//AT1G17710| phosphatase	Unigene102629_All//2.00E-58//TC169946			GO:0016791	nr -
Unigene10263_All	622	0	9.0423	4.7086	0	0.1107	0	0	0	0	13.1425	4.3421e-32	Up	12.2011	3.5224e-16	Up	6.7905	0.61694		null	null		null	null		null	null
Unigene10266_All	712	0	45.4744	14.5091	0	0.1935	0	0	0	0	15.4728	9.7303e-187	Up	13.8247	5.3787e-58	Up	7.5962	0.32058		null	null		null	null		null	null		Unigene10266_All//gi|38325811|gb|AAR17078.1|//3.00E-89//heat shock protein 70-1 [Nicotiana tabacum]	Unigene10266_All//2.00E-86//AT5G02500| HSC70-1 (HEAT SHOCK COGNATE PROTEIN 70-1); ATP binding	Unigene10266_All//2.00E-13//TC161167		ko03040|Spliceosome//ko04141|Protein processing in endoplasmic reticulum//ko04144|Endocytosis	GO:0004672//GO:0006464//GO:0032559//GO:0050896	nr +
Unigene102670_All	220	0	0.2303	0	2.7171	0.4696	0	1.1531	0.38	0.3622	7.8474	0.62325		null	null		-2.5326	0.013605		-11.4079	0.00077075	Down	-1.6014	0.31141		-1.6707	0.25691				Unigene102670_All//6.00E-45//ES832413
Unigene10269_All	558	276.982	321.179	318.546	97.6644	154.095	132.657	4.8493	17.0778	10.7093	0.2136	1.9001e-08		0.2017	3.0208e-07		0.6579	3.2633e-36		0.4418	4.5123e-14		1.8163	1.79e-21	Up	1.143	1.6634e-07	Up	Unigene10269_All//gi|224058639|ref|XP_002299579.1|//9.00E-57//cytochrome P450 [Populus trichocarpa] >gi|222846837|gb|EEE84384.1| cytochrome P450 [Populus trichocarpa]	Unigene10269_All//2.00E-50//AT2G45550| CYP76C4; electron carrier/ heme binding / iron ion binding / monooxygenase/ oxygen binding	Unigene10269_All//0.00E+00//gi|48740564|gb|CO071083.1|CO071083		ko00945|Stilbenoid, diarylheptanoid and gingerol biosynthesis//ko00903|Limonene and pinene degradation//ko00941|Flavonoid biosynthesis//ko00944|Flavone and flavonol biosynthesis	GO:0005506//GO:0008152//GO:0016709	nr +
Unigene10271_All	347	0	6.571	3.5295	0	0	0	0	0	0	12.6819	5.6391e-13	Up	11.7852	9.1289e-07	Up	null	null		null	null		null	null		null	null
Unigene10272_All	759	0	12.417	5.4723	0	0.1361	0	0	0	0	13.6	5.67e-54	Up	12.4179	4.8362e-23	Up	7.0885	0.45905		null	null		null	null		null	null		Unigene10272_All//sp|P27878|VIT1_CERCA//2.00E-119//Vitellogenin-1 OS=Ceratitis capitata GN=VG1-GAMMA PE=2 SV=1						swissprot -
Unigene102727_All	389	4.7075	5.3405	3.696	14.3424	10.0916	12.0745	62.3877	22.5632	37.0735	0.182	0.67259		-0.349	0.49407		-0.5071	0.037991		-0.2483	0.39162		-1.4673	1.0718e-39	Down	-0.7509	2.6387e-14		Unigene102727_All//gi|115473585|ref|NP_001060391.1|//1.00E-07//Os07g0636000 [Oryza sativa Japonica Group] >gi|113611927|dbj|BAF22305.1| Os07g0636000 [Oryza sativa Japonica Group]		Unigene102727_All//3.00E-23//TC179304			GO:0005488	nr +
Unigene102730_All	204	0	0.4968	0.7831	0.2442	0	0.8856	328.293	717.493	291.955	8.9565	0.39143		9.6131	0.24018		-7.9319	0.56572		1.8586	0.45949		1.128	1.2972e-156	Up	-0.1692	0.0033797				Unigene102730_All//2.00E-57//CD485591
Unigene10274_All	310	0.3376	1.1441	0.1718	0	0	0.2914	8.7288	0.9438	2.3132	1.7608	0.21836		-0.9746	0.72264		null	null		8.1869	0.48262		-3.2092	3.8588e-12	Down	-1.9159	2.3319e-07	Down			Unigene10274_All//3.00E-146//ES846200
Unigene102740_All	251	0	1.2112	1.0608	1.5877	1.5091	1.7993	44.47	489.393	10.6342	10.2422	0.044501		10.0509	0.080444		-0.0732	0.92565		0.1805	0.88378		3.4601	0	Up	-2.0641	1.4594e-30	Down	Unigene102740_All//gi|294992077|gb|ABG90381.2|//6.00E-21//glutathione S-transferase [Caragana korshinskii]	Unigene102740_All//2.00E-20//AT1G78380| ATGSTU19 (GLUTATHIONE S-TRANSFERASE TAU 19); glutathione binding / glutathione transferase	Unigene102740_All//2.00E-82//gi|31407290|gb|CD486325.1|CD486325		ko00480|Glutathione metabolism	GO:0009755//GO:0016765	nr -
Unigene10276_All	868	0	0	0	0	0	0	2.7765	0.3852	7.4812	null	null		null	null		null	null		null	null		-2.8496	9.1497e-10	Down	1.43	4.6147e-11	Up	Unigene10276_All//gi|5080804|gb|AAD39313.1|AC007258_2//5.00E-54//Hypothetical protein [Arabidopsis thaliana] >gi|15010642|gb|AAK73980.1| At1g59710/T30E16_31 [Arabidopsis thaliana] >gi|22137290|gb|AAM91490.1| At1g59710/T30E16_31 [Arabidopsis thaliana]	Unigene10276_All//2.00E-61//AT3G28630| FUNCTIONS IN: molecular_function unknown; INVOLVED IN: biological_process unknown; LOCATED IN: endomembrane system; EXPRESSED IN: leaf whorl, male gametophyte, flower, pollen tube; EXPRESSED DURING: L mature pollen stage, M germinated pollen stage, 4 anthesis; CONTAINS InterPro DOMAIN/s: Protein of unknown function DUF569 (InterPro:IPR007679), Actin_cross-li…					nr -
Unigene10277_All	217	0	0	0	0	0	0	0.3897	0	3.4882	null	null		null	null		null	null		null	null		-8.6062	0.40829		3.162	0.00068291	Up			Unigene10277_All//4.00E-15//TC171388
Unigene10279_All	257	0	0	0	0	0	0	1.9742	5.692	0	null	null		null	null		null	null		null	null		1.5277	0.0029648		-10.9471	0.00055603	Down
Unigene102790_All	362	0.1445	0	0	3.4402	1.4269	0.499	0.584	1.501	7.4835	-7.1749	0.62223		-7.1749	0.63509		-1.2696	0.029163		-2.7854	0.00013465	Down	1.3619	0.14368		3.6797	8.1918e-14	Up	Unigene102790_All//gi|269996964|gb|ACZ57767.1|//5.00E-35//phospholipase A1 [Nicotiana attenuata]	Unigene102790_All//2.00E-24//AT4G16820| lipase class 3 family protein	Unigene102790_All//1.00E-115//gi|78333729|gb|DT554003.1|DT554003			GO:0004091//GO:0009536//GO:0044238	nr +
Unigene102794_All	255	0	0	0	0.586	0.5402	0	0.9948	0.6556	5.1556	null	null		null	null		-0.1174	0.91174		-9.1948	0.23478		-0.6016	0.6485		2.3737	7.2038e-05	Up	Unigene102794_All//gi|7211984|gb|AAF40455.1|AC004809_13//1.00E-11//Strong similarity to the SEN3-like tRNA-processing protein F24L7.13 from A. thaliana gi|2914700 on BAC gb|AC003974. EST gb|AA712969 comes from this gene [Arabidopsis thaliana]	Unigene102794_All//4.00E-13//AT1G04810| 26S proteasome regulatory subunit, putative	Unigene102794_All//3.00E-87//CO124331		ko03050|Proteasome	GO:0005838//GO:0009894//GO:0016020//GO:0019941//GO:0031410//GO:0043231	nr -
Unigene102797_All	210	0	0	0	0.7116	0.6559	4.3013	55.7696	41.9948	115.722	null	null		null	null		-0.1176	0.91172		2.5956	0.0034272		-0.4093	0.0061707		1.0531	1.6539e-24	Up	Unigene102797_All//gi|18766934|gb|AAL79181.1|//5.00E-13//beta-caryophyllene synthase QHS1 [Artemisia annua]	Unigene102797_All//1.00E-09//AT5G23960| TPS21 (TERPENE SYNTHASE 21); (-)-E-beta-caryophyllene synthase/ alpha-humulene synthase	Unigene102797_All//6.00E-48//CO111120		ko00904|Diterpenoid biosynthesis//ko00900|Terpenoid backbone biosynthesis//ko00902|Monoterpenoid biosynthesis	GO:0046872	nr +
Unigene10281_All	794	0	0	0	0	0	0	7.3484	63.4306	0.2509	null	null		null	null		null	null		null	null		3.1097	1.3932e-208	Up	-4.8722	1.0081e-35	Down			Unigene10281_All//6.00E-08//ES813936
Unigene10282_All	577	0	22.2173	7.5676	0	0	0	0	0	0	14.4394	1.4536e-73	Up	12.8856	3.0857e-24	Up	null	null		null	null		null	null		null	null		Unigene10282_All//gi|219109896|ref|XP_002176701.1|//3.00E-55//nucleoside diphosphate kinase 1 [Phaeodactylum tricornutum CCAP 1055/1] >gi|217411236|gb|EEC51164.1| nucleoside diphosphate kinase 1 [Phaeodactylum tricornutum CCAP 1055/1]	Unigene10282_All//1.00E-51//AT4G09320| NDPK1; ATP binding / nucleoside diphosphate kinase			ko00230|Purine metabolism//ko00240|Pyrimidine metabolism	GO:0007602//GO:0009206//GO:0009209//GO:0016776//GO:0023033//GO:0032559//GO:0042995//GO:0043169//GO:0044424	nr +
Unigene10283_All	674	0	4.661	6.9525	0	0	0.067	0.1255	0	0.1182	12.1864	7.0776e-18	Up	12.7633	4.8649e-26	Up	null	null		6.0661	0.70482		-6.9715	0.40827		-0.0865	0.97422		Unigene10283_All//gi|40287526|gb|AAR83877.1|//4.00E-69//60S ribosomal protein L19 [Capsicum annuum]	Unigene10283_All//2.00E-50//AT4G02230| 60S ribosomal protein L19 (RPL19C)			ko03010|Ribosome	GO:0005198//GO:0010467//GO:0015934//GO:0016020//GO:0022613	nr +
Unigene102840_All	205	0	3.2132	0.5195	1.458	1.3438	1.9828	0	0.6116	0.1943	11.6498	0.00062599	Up	9.021	0.40311		-0.1177	0.90077		0.4435	0.70109		9.2564	0.24122		7.6021	0.64956
Unigene102848_All	334	0	0.3034	1.116	0.4474	0.3093	0.5409	1.519	7.5082	21.947	8.2451	0.39139		10.1241	0.025052		-0.5326	0.78617		0.2738	0.90583		2.3053	3.9087e-08	Up	3.8528	1.1459e-37	Up	Unigene102848_All//gi|264664459|sp|C0LGJ1.1|Y1743_ARATH//3.00E-43//RecName: Full=Probable LRR receptor-like serine/threonine-protein kinase At1g74360; Flags: Precursor >gi|224589485|gb|ACN59276.1| leucine-rich repeat receptor-like protein kinase [Arabidopsis thaliana]	Unigene102848_All//1.00E-44//AT1G74360| leucine-rich repeat transmembrane protein kinase, putative	Unigene102848_All//1.00E-155//DT467067			GO:0004672//GO:0004871//GO:0006464//GO:0007167//GO:0016791//GO:0031224//GO:0031410//GO:0032559//GO:0043231	nr -
Unigene10286_All	650	0	0.078	0	0.3065	0.053	0.139	0.4553	1.9933	1.7161	6.2854	0.62315		null	null		-2.5318	0.23412		-1.1408	0.57006		2.1303	0.00033968	Up	1.9142	0.0018722		Unigene10286_All//gi|18416730|ref|NP_567744.1|//3.00E-21//UNE17 (UNFERTILIZED EMBRYO SAC 17); identical protein binding / serine-type endopeptidase [Arabidopsis thaliana] >gi|4539429|emb|CAB38962.1| subtilisin protease-like [Arabidopsis thaliana] >gi|7269485|emb|CAB79488.1| subtilisin protease-like [Arabidopsis thaliana]	Unigene10286_All//2.00E-22//AT4G26330| UNE17 (UNFERTILIZED EMBRYO SAC 17); identical protein binding / serine-type endopeptidase				GO:0004175//GO:0005515//GO:0009566//GO:0019538//GO:0042579//GO:0044092	nr -
Unigene102877_All	312	0.1677	2.9232	1.1947	2.2353	2.6489	1.3028	0.6776	0	0.6384	4.1236	0.00023368	Up	2.8327	0.09317		0.2449	0.80292		-0.7789	0.39338		-9.4043	0.07484		-0.086	0.96148
Unigene10289_All	708	0	0	0	0	0	0	12.0033	7.8515	1.2379	null	null		null	null		null	null		null	null		-0.6124	0.00051644		-3.2775	7.599e-39	Down			Unigene10289_All//1.00E-11//TC165956
Unigene10290_All	331	0	0.4592	0	3.3109	1.4565	0	2.1715	0.3788	1.4443	8.843	0.23682		null	null		-1.1847	0.059441		-11.693	7.2563e-07	Down	-2.5192	0.0046943		-0.5883	0.4089		Unigene10290_All//gi|224101869|ref|XP_002312452.1|//5.00E-11//predicted protein [Populus trichocarpa] >gi|222852272|gb|EEE89819.1| predicted protein [Populus trichocarpa]		Unigene10290_All//1.00E-10//DW225279			GO:0016798	nr -
Unigene10291_All	665	0	0	0	0	0	0	2.2889	0.1886	1.1382	null	null		null	null		null	null		null	null		-3.6013	9.5542e-08	Down	-1.0079	0.029442		Unigene10291_All//gi|225447256|ref|XP_002272957.1|//2.00E-26//PREDICTED: similar to Os04g0636200 [Vitis vinifera]						nr -
Unigene10293_All	415	0	0	0	0	0	0	2.0376	0.9064	0.288	null	null		null	null		null	null		null	null		-1.1687	0.092932		-2.8227	0.00053787	Down	Unigene10293_All//gi|159473469|ref|XP_001694856.1|//1.00E-07//acidic ribosomal protein P2 [Chlamydomonas reinhardtii] >gi|158276235|gb|EDP02008.1| acidic ribosomal protein P2 [Chlamydomonas reinhardtii]	Unigene10293_All//7.00E-06//AT3G44590| 60S acidic ribosomal protein P2 (RPP2D)			ko03010|Ribosome	GO:0043229	nr +
Unigene10299_All	386	0	0	0	0	0	0	1.0953	3.7898	2.9931	null	null		null	null		null	null		null	null		1.7908	0.00072486	Up	1.4503	0.010894
Unigene102998_All	284	0	0	0.375	0.1754	0.1213	2.8625	66.2489	74.1727	60.8802	null	null		8.5507	0.40308		-0.5321	0.82943		4.0286	0.00059091	Up	0.163	0.17009		-0.1219	0.33883		Unigene102998_All//gi|14582310|gb|AAK69446.1|//4.00E-51//proline-rich protein-2 [Gossypium hirsutum]		Unigene102998_All//3.00E-140//NP386003				nr -
Unigene10300_All	1671	0	0	0	0	0	0	8.3498	12.181	0.1907	null	null		null	null		null	null		null	null		0.5448	5.2073e-07		-5.4524	1.2304e-89	Down	Unigene10300_All//gi|299470262|emb|CBN79566.1|//1.00E-13//RecName: Full=Spherulin-4; Flags: Precursor [Ectocarpus siliculosus]						nr +
Unigene10301_All	896	0	5.0896	2.4961	0	0	0	0	0	0	12.3133	5.5414e-26	Up	11.2855	2.5049e-12	Up	null	null		null	null		null	null		null	null		Unigene10301_All//gi|301098633|ref|XP_002898409.1|//2.00E-06//lamin-like protein [Phytophthora infestans T30-4] >gi|262105180|gb|EEY63232.1| lamin-like protein [Phytophthora infestans T30-4]	Unigene10301_All//2.00E-05//AT2G32240| FUNCTIONS IN: molecular_function unknown; INVOLVED IN: response to cadmium ion; LOCATED IN: plasma membrane; EXPRESSED IN: 25 plant structures; EXPRESSED DURING: 13 growth stages; CONTAINS InterPro DOMAIN/s: Prefoldin (InterPro:IPR009053); BEST Arabidopsis thaliana protein match is: unknown protein (TAIR:AT1G05320.3); Has 221693 Blast hits to 95553 proteins …			ko03440|Homologous recombination//ko03450|Non-homologous end-joining		nr +
Unigene10302_All	605	0.6054	0.67	0.3521	3.8699	1.8783	0.8212	0.7687	0.3454	0.5926	0.1463	0.89843		-0.7819	0.55338		-1.0429	0.008017		-2.2365	1.7019e-06	Down	-1.1542	0.25327		-0.3754	0.66491		Unigene10302_All//gi|28950973|gb|AAO63410.1|//2.00E-89//At1g23340 [Arabidopsis thaliana]	Unigene10302_All//1.00E-88//AT1G10750| unknown protein	Unigene10302_All//4.00E-138//NP508247			GO:0044464	nr +
Unigene10303_All	322	0.325	1.5736	3.1421	0	0	0	0	0	0	2.2756	0.062344		3.2732	0.00059274	Up	null	null		null	null		null	null		null	null		Unigene10303_All//gi|224138866|ref|XP_002322921.1|//4.00E-44//aldose reductase with ABC domain [Populus trichocarpa] >gi|222867551|gb|EEF04682.1| aldose reductase with ABC domain [Populus trichocarpa]	Unigene10303_All//2.00E-32//AT2G37770| aldo/keto reductase family protein	Unigene10303_All//2.00E-67//DR460967		ko00010|Glycolysis / Gluconeogenesis//ko00051|Fructose and mannose metabolism//ko00561|Glycerolipid metabolism//ko00591|Linoleic acid metabolism//ko00650|Butanoate metabolism	GO:0004033//GO:0006970//GO:0008152	nr +
Unigene10305_All	842	0	0	0	0.1183	0.1227	0.59	0.6026	2.5316	4.6368	null	null		null	null		0.0527	0.96868		2.3183	0.068873		2.0708	3.0411e-06	Up	2.9439	3.3179e-16	Up
Unigene103070_All	375	0.1395	0	0	0	0.0918	0	1.353	0	0	-7.1241	0.62206		-7.1241	0.63491		6.5204	0.84111		null	null		-10.4019	0.00089107	Down	-10.4019	0.00055601	Down	Unigene103070_All//gi|18412056|ref|NP_565185.1|//9.00E-08//POLD3; DNA-directed DNA polymerase [Arabidopsis thaliana] >gi|4836868|gb|AAD30571.1|AC007260_2 Hypothetical protein [Arabidopsis thaliana]		Unigene103070_All//1.00E-109//BG445037		ko00230|Purine metabolism//ko00240|Pyrimidine metabolism//ko03420|Nucleotide excision repair//ko03410|Base excision repair//ko03030|DNA replication//ko03440|Homologous recombination//ko03430|Mismatch repair		nr +
Unigene10309_All	376	0	0	0	0.265	0	0	281.568	54.9125	230.873	null	null		null	null		-8.0498	0.31789		-8.0498	0.40596		-2.3583	0	Down	-0.2864	6.8694e-11		Unigene10309_All//gi|15224236|ref|NP_181844.1|//4.00E-07//proline-rich extensin-like family protein [Arabidopsis thaliana]		Unigene10309_All//0.00E+00//TC158176				nr +
Unigene1031_All	930	8.2701	6.3745	6.5274	13.6052	10.7749	13.5005	25.2317	11.6848	11.0092	-0.3756	0.078829		-0.3414	0.1379		-0.3365	0.031809		-0.0111	0.94227		-1.1106	3.5382e-25	Down	-1.1965	4.0361e-29	Down	Unigene1031_All//gi|297842397|ref|XP_002889080.1|//1.00E-107//ribophorin I family protein [Arabidopsis lyrata subsp. lyrata] >gi|297334921|gb|EFH65339.1| ribophorin I family protein [Arabidopsis lyrata subsp. lyrata]	Unigene1031_All//3.00E-101//AT1G76400| ribophorin I family protein	Unigene1031_All//0.00E+00//gi|48813336|gb|CO114649.1|CO114649		ko04141|Protein processing in endoplasmic reticulum//ko00510|N-Glycan biosynthesis	GO:0004576//GO:0006464//GO:0031224//GO:0031410//GO:0043231	nr -
Unigene10310_All	639	0.2456	1.0308	0	2.0269	0	0	2.5805	0.7849	0.6858	2.0694	0.03927		-7.9402	0.24665		-10.9851	1.335e-09	Down	-10.9851	4.2406e-08	Down	-1.7171	0.00044453	Down	-1.9118	8.6292e-05	Down	Unigene10310_All//gi|16326137|dbj|BAB70512.1|//7.00E-64//Myb [Nicotiana tabacum]	Unigene10310_All//4.00E-55//AT5G11510| MYB3R-4 (myb domain protein 3R-4); DNA binding / transcription coactivator/ transcription factor	Unigene10310_All//8.00E-07//ES830113	MYB		GO:0006350//GO:0010468//GO:0043231	nr -
Unigene103112_All	231	0.453	0	0	3.8816	1.0435	0.391	0.183	0	0	-8.8234	0.37768		-8.8234	0.39975		-1.8952	0.010619		-3.3114	0.00057977	Down	-7.5157	0.66547		-7.5157	0.61933				Unigene103112_All//2.00E-32//DW500061
Unigene10315_All	483	0	0	0	0	0	0	4.5519	4.5863	0.2474	null	null		null	null		null	null		null	null		0.0109	1.0172		-4.2016	1.1616e-12	Down	Unigene10315_All//gi|192910854|gb|ACF06535.1|//2.00E-39//60S ribosomal protein L27 [Elaeis guineensis]	Unigene10315_All//1.00E-38//AT2G32220| 60S ribosomal protein L27 (RPL27A)	Unigene10315_All//1.00E-07//gi|78337699|gb|DT557973.1|DT557973		ko03010|Ribosome	GO:0030529	nr +
Unigene10316_All	264	0	0	3.0256	0	0.7826	1.8818	0	0.475	2.7163	null	null		11.563	0.00017246	Up	9.6121	0.15751		10.8779	0.0043843		8.8918	0.2412		11.4074	2.6289e-05	Up
Unigene103176_All	631	0.4975	1.2045	0.4219	2.1315	1.3097	1.6462	0.8711	1.5897	5.2403	1.2757	0.12846		-0.2378	0.85045		-0.7026	0.21789		-0.3727	0.55275		0.8678	0.16361		2.5887	3.5109e-12	Up	Unigene103176_All//gi|297839709|ref|XP_002887736.1|//2.00E-45//protein binding protein [Arabidopsis lyrata subsp. lyrata] >gi|297333577|gb|EFH63995.1| protein binding protein [Arabidopsis lyrata subsp. lyrata]	Unigene103176_All//1.00E-46//AT1G78420| protein binding / zinc ion binding	Unigene103176_All//3.00E-163//TC172240			GO:0003824//GO:0043231//GO:0046914	nr -
Unigene10318_All	972	0	37.8457	14.5177	0	0	0	0	0	0	15.2078	2.8725e-212	Up	13.8255	1.6906e-79	Up	null	null		null	null		null	null		null	null		Unigene10318_All//gi|226505998|ref|NP_001146929.1|//1.00E-115//60S ribosomal protein L7a [Zea mays] >gi|195605318|gb|ACG24489.1| 60S ribosomal protein L7a [Zea mays]	Unigene10318_All//1.00E-80//AT3G62870| 60S ribosomal protein L7A (RPL7aB)			ko03010|Ribosome	GO:0005198//GO:0009987//GO:0010467//GO:0030529//GO:0046872	nr +
Unigene1032_All	2509	11.4901	9.209	11.0787	21.9588	22.3713	24.0847	33.6354	19.4236	12.8455	-0.3193	0.001725		-0.0526	0.646		0.0268	0.80313		0.1333	0.073028		-0.7922	1.3279e-50		-1.3887	5.3358e-129	Down	Unigene1032_All//gi|15223039|ref|NP_177766.1|//0.00E+00//ribophorin I family protein [Arabidopsis thaliana] >gi|22655006|gb|AAM98094.1| At1g76400/F15M4_10 [Arabidopsis thaliana]	Unigene1032_All//0.00E+00//AT1G76400| ribophorin I family protein	Unigene1032_All//0.00E+00//TC167797		ko04141|Protein processing in endoplasmic reticulum//ko00510|N-Glycan biosynthesis	GO:0004576//GO:0006464//GO:0031224//GO:0043231	nr +
Unigene10320_All	352	0	0	0	0	0	0	4.6845	1.3061	0.5659	null	null		null	null		null	null		null	null		-1.8426	0.00020728	Down	-3.0493	1.309e-07	Down	Unigene10320_All//gi|149392583|gb|ABR26094.1|//2.00E-10//retrotransposon protein [Oryza sativa Indica Group]		Unigene10320_All//8.00E-24//TC152783				nr +
Unigene10323_All	312	43.6007	29.3948	22.5288	61.7888	50.5492	32.5697	61.9296	33.4902	16.5994	-0.5688	0.00018079		-0.9526	2.8369e-09		-0.2897	0.019664		-0.9238	1.1264e-13		-0.8869	1.2028e-14		-1.8995	6.1671e-47	Down	Unigene10323_All//gi|416641|sp|P32294.1|AX22B_PHAAU//3.00E-09//RecName: Full=Auxin-induced protein 22B; AltName: Full=Indole-3-acetic acid-induced protein ARG4	Unigene10323_All//9.00E-10//AT5G43700| ATAUX2-11 (AUXIN INDUCIBLE 2-11); DNA binding / transcription factor	Unigene10323_All//2.00E-141//CB066529				nr -
Unigene103235_All	610	8.663	7.6419	6.5471	8.1663	5.4193	2.9615	0.9704	0.8222	0.3919	-0.1809	0.51931		-0.404	0.14445		-0.5916	0.021088		-1.4634	1.2184e-07	Down	-0.2391	0.76504		-1.3081	0.1148		Unigene103235_All//gi|158427472|gb|ABW38331.1|//7.00E-87//chloroplast fructose-1,6-bisphosphatase II [Fragaria x ananassa] >gi|190151803|gb|ACE63522.1| chloroplast fructose-1,6-bisphosphatase [Fragaria x ananassa]	Unigene103235_All//2.00E-82//AT5G64380| fructose-1,6-bisphosphatase family protein	Unigene103235_All//0.00E+00//gi|48800926|gb|CO102240.1|CO102240		ko00010|Glycolysis / Gluconeogenesis//ko00710|Carbon fixation in photosynthetic organisms//ko00051|Fructose and mannose metabolism//ko00030|Pentose phosphate pathway	GO:0005975//GO:0009536//GO:0019203	nr +
Unigene10324_All	320	15.2057	6.3337	14.4773	12.6092	8.824	3.2461	0	0	0	-1.2635	7.6477e-06	Down	-0.0708	0.80591		-0.515	0.084096		-1.9577	3.4421e-09	Down	null	null		null	null				Unigene10324_All//8.00E-30//gi|164302226|gb|ES807570.1|ES807570
Unigene103249_All	281	0	0	1.137	0.1773	0.2451	2.893	0	0	0	null	null		10.151	0.045404		0.4672	0.96207		4.0283	0.00059087	Up	null	null		null	null				Unigene103249_All//2.00E-11//TC171826
Unigene10326_All	341	0	3.8634	1.2493	0	0	0	0	0	0	11.9157	1.4963e-07	Up	10.2869	0.01386		null	null		null	null		null	null		null	null								ESTscan +
Unigene10328_All	321	0	0	0	0.3104	0.6437	0.1407	441.505	118.877	71.9826	null	null		null	null		1.0523	0.613		-1.1415	0.67921		-1.893	0	Down	-2.6167	0	Down							ESTscan +
Unigene10329_All	929	0	0.3818	0.1146	0	0	0	0.2731	2.9244	14.323	8.5767	0.024678		6.8405	0.40304		null	null		null	null		3.4206	8.2329e-13	Up	5.7128	4.0439e-85	Up	Unigene10329_All//gi|224054472|ref|XP_002298277.1|//5.00E-68//NAC domain protein, IPR003441 [Populus trichocarpa] >gi|224149083|ref|XP_002336754.1| NAC domain protein, IPR003441 [Populus trichocarpa] >gi|222836661|gb|EEE75054.1| NAC domain protein, IPR003441 [Populus trichocarpa] >gi|222845535|gb|EEE83082.1| NAC domain protein, IPR003441 [Populus trichocarpa]	Unigene10329_All//6.00E-61//AT5G22380| anac090 (Arabidopsis NAC domain containing protein 90); transcription factor	Unigene10329_All//0.00E+00//TC166110	NAC		GO:0001071//GO:0009743//GO:0010468//GO:0032501	nr +
Unigene1033_All	686	12.1268	17.2099	19.5612	20.3323	15.1596	42.2008	50.7855	109.181	86.4719	0.505	0.0022347		0.6898	1.3898e-05		-0.4235	0.002993		1.0535	9.6456e-25	Up	1.1042	8.7422e-78	Up	0.7678	9.1977e-35		Unigene1033_All//gi|4263517|gb|AAD15343.1|//5.00E-58//similar to PHZF, catalyzing the hydroxylation of phenazine-1-carboxylic acid to 2-hydroxy-phenazine-1-carboxylic acid [Arabidopsis thaliana] >gi|51972158|gb|AAU15183.1| At4g02860 [Arabidopsis thaliana]	Unigene1033_All//3.00E-59//AT4G02860| catalytic	Unigene1033_All//0.00E+00//gi|164253821|gb|ES839366.1|ES839366			GO:0008152	nr -
Unigene10330_All	493	0	0	0	0	0	0	2.9159	2.7129	0	null	null		null	null		null	null		null	null		-0.1041	0.83725		-11.5097	1.1866e-10	Down							ESTscan +
Unigene103316_All	377	0	0	0	1.4535	0	0	0	0	0	null	null		null	null		-10.5053	0.00040083	Down	-10.5053	0.0015201		null	null		null	null		Unigene103316_All//gi|115452451|ref|NP_001049826.1|//1.00E-15//Os03g0295700 [Oryza sativa Japonica Group] >gi|108707640|gb|ABF95435.1| expressed protein [Oryza sativa (japonica cultivar-group)] >gi|113548297|dbj|BAF11740.1| Os03g0295700 [Oryza sativa Japonica Group]	Unigene103316_All//3.00E-21//AT5G58510| unknown protein	Unigene103316_All//1.00E-121//TC142475			GO:0009536	nr -
Unigene10332_All	470	0	43.8776	21.9798	0	0	0	0	0	0	15.4212	1.1524e-118	Up	14.4239	5.3739e-58	Up	null	null		null	null		null	null		null	null		Unigene10332_All//gi|15229845|ref|NP_187143.1|//7.00E-41//40S ribosomal protein S24 (RPS24A) [Arabidopsis thaliana] >gi|11134742|sp|Q9SS17.1|RS241_ARATH RecName: Full=40S ribosomal protein S24-1 >gi|15215672|gb|AAK91381.1| AT3g04920/T9J14_13 [Arabidopsis thaliana] >gi|20334888|gb|AAM16200.1| AT3g04920/T9J14_13 [Arabidopsis thaliana]	Unigene10332_All//4.00E-34//AT3G04920| 40S ribosomal protein S24 (RPS24A)			ko03010|Ribosome	GO:0005198//GO:0005488//GO:0009536//GO:0010467//GO:0015935//GO:0016020//GO:0022613//GO:0031981	nr -
Unigene103341_All	215	0	0.4713	0.2477	0.2317	0	0.4201	0.7866	4.6656	0.3706	8.8805	0.39129		7.9525	0.64242		-7.8561	0.56529		0.8585	0.79722		2.5684	0.00047888	Up	-1.0858	0.55358		Unigene103341_All//gi|51536426|gb|AAU05451.1|//1.00E-13//At5g19870 [Arabidopsis thaliana] >gi|51972068|gb|AAU15138.1| At5g19870 [Arabidopsis thaliana]	Unigene103341_All//4.00E-15//AT5G19870| unknown protein	Unigene103341_All//3.00E-56//CO129484			GO:0044464	nr +
Unigene10335_All	579	0.7229	0.7001	0.9197	0.6022	2.6763	3.4321	0.073	0	0	-0.0462	0.98045		0.3474	0.70589		2.1519	0.0002296	Up	2.5108	3.7813e-06	Up	-6.1898	0.66525		-6.1898	0.61916		Unigene10335_All//gi|297832296|ref|XP_002884030.1|//1.00E-34//tetracycline transporter [Arabidopsis lyrata subsp. lyrata] >gi|297329870|gb|EFH60289.1| tetracycline transporter [Arabidopsis lyrata subsp. lyrata]	Unigene10335_All//4.00E-32//AT2G16990| tetracycline transporter	Unigene10335_All//1.00E-66//TC151593			GO:0005215//GO:0006810//GO:0016020//GO:0031410//GO:0042221	nr +
Unigene103358_All	211	0.7439	1.2007	0.7571	1.1804	2.1216	7.4916	2.0038	0.7923	0.1888	0.6907	0.62692		0.0254	1.003		0.8459	0.51379		2.666	2.7051e-05	Up	-1.3386	0.22457		-3.4078	0.012434
Unigene10338_All	545	0	0	0	0.457	1.0109	0	0.3879	0.8436	2.193	null	null		null	null		1.1454	0.29741		-8.8361	0.073591		1.1209	0.27378		2.4991	0.00010304	Up	Unigene10338_All//gi|66792688|gb|AAY56446.1|//3.00E-46//At1g63930 [Arabidopsis thaliana] >gi|115311479|gb|ABI93920.1| At1g63930 [Arabidopsis thaliana]	Unigene10338_All//2.00E-38//AT1G63930| unknown protein	Unigene10338_All//0.00E+00//TC174086			GO:0003824//GO:0008152//GO:0030554	nr -
Unigene103382_All	234	96.8159	35.945	76.6891	247.794	237.515	174.863	267.413	251.489	161.398	-1.4295	2.976e-29	Down	-0.3362	0.0056044		-0.0611	0.48437		-0.5029	4.5666e-14		-0.0886	0.19992		-0.7285	1.1403e-33				Unigene103382_All//4.00E-80//gi|78347287|gb|DT567561.1|DT567561
Unigene1034_All	616	1.5289	2.9612	1.2967	0.1617	1.9006	3.226	1.51	7.6671	11.3178	0.9537	0.048918		-0.2376	0.72283		3.5551	2.9186e-05	Up	4.3184	1.5741e-09	Up	2.3441	5.4988e-15	Up	2.906	4.9417e-28	Up	Unigene1034_All//gi|79461947|ref|NP_192195.2|//2.00E-27//catalytic [Arabidopsis thaliana]	Unigene1034_All//6.00E-29//AT4G02860| catalytic	Unigene1034_All//6.00E-140//gi|48778677|gb|CO088043.1|CO088043			GO:0008152	nr -
Unigene10343_All	513	0	0	0	0	0	0	5.6868	0.6518	2.951	null	null		null	null		null	null		null	null		-3.1251	9.7433e-13	Down	-0.9464	0.0028102		Unigene10343_All//gi|15236902|ref|NP_194418.1|//3.00E-33//stigma-specific Stig1 family protein [Arabidopsis thaliana] >gi|4455211|emb|CAB36534.1| STIG1 like protein [Arabidopsis thaliana] >gi|7269541|emb|CAB79543.1| STIG1 like protein [Arabidopsis thaliana]	Unigene10343_All//2.00E-34//AT4G26880| stigma-specific Stig1 family protein					nr +
Unigene103449_All	402	0	0	0	0.1239	0	0	4.5225	0.3119	0.8919	null	null		null	null		-6.953	0.56524		-6.953	0.64615		-3.858	1.3108e-09	Down	-2.3422	1.8321e-06	Down							ESTscan -
Unigene10345_All	494	0	6.5645	6.6832	0	0.0697	0	0	0	0.1613	12.6805	1.8756e-18	Up	12.7063	2.9198e-18	Up	6.1231	0.84075		null	null		null	null		7.3336	0.40645		Unigene10345_All//gi|157093615|gb|ABV22462.1|//2.00E-63//ribosomal protein S23e [Oxyrrhis marina]	Unigene10345_All//8.00E-61//AT5G02960| 40S ribosomal protein S23 (RPS23B)	Unigene10345_All//8.00E-28//TC142994		ko03010|Ribosome	GO:0005198//GO:0010467//GO:0033279	nr -
Unigene103456_All	251	1.6676	3.2299	1.2729	6.3508	10.701	3.9585	2.3583	0.8326	0	0.9537	0.2265		-0.3897	0.7175		0.7527	0.049134		-0.682	0.20658		-1.5021	0.091377		-11.2035	0.00014167	Down			Unigene103456_All//4.00E-80//TC163108
Unigene10346_All	1122	0	16.6189	0.0949	0.0888	0.0614	0.483	0	0.298	4.5449	14.0205	3.0871e-107	Up	6.5683	0.40298		-0.5323	0.81989		2.4434	0.044149		8.2192	0.012761		12.15	1.6949e-36	Up	Unigene10346_All//gi|225436325|ref|XP_002267961.1|//2.00E-53//PREDICTED: similar to CBF-like transcription factor [Vitis vinifera] >gi|39578548|gb|AAR28676.1| CBF-like transcription factor [Vitis vinifera]	Unigene10346_All//8.00E-35//AT4G25490| CBF1 (C-REPEAT/DRE BINDING FACTOR 1); DNA binding / transcription activator/ transcription factor	Unigene10346_All//0.00E+00//TC142390	AP2-EREBP			nr +
Unigene10347_All	1014	0.3612	0.0999	0	0.1965	0.7471	0.2672	1.3343	2.3907	4.1253	-1.8542	0.18728		-8.4967	0.027874		1.9268	0.033621		0.4434	0.76406		0.8414	0.021164		1.6284	8.5169e-09	Up	Unigene10347_All//gi|264664473|sp|C0LGK4.1|Y2165_ARATH//6.00E-92//RecName: Full=Probable LRR receptor-like serine/threonine-protein kinase At2g16250; Flags: Precursor >gi|224589511|gb|ACN59289.1| leucine-rich repeat receptor-like protein kinase [Arabidopsis thaliana]	Unigene10347_All//8.00E-70//AT2G16250| leucine-rich repeat transmembrane protein kinase, putative	Unigene10347_All//4.00E-28//TC176578		ko04626|Plant-pathogen interaction	GO:0004672//GO:0005618//GO:0006464//GO:0007167//GO:0016020//GO:0032559	nr -
Unigene103479_All	364	0.575	0.1392	0.1463	0.958	0.1892	2.8537	0.1162	0.3445	1.97	-2.0464	0.33403		-1.9746	0.38178		-2.3401	0.10089		1.5747	0.029175		1.5679	0.54646		4.0835	0.00024086	Up			Unigene103479_All//4.00E-10//TC158284
Unigene10348_All	346	2.117	0	0.1539	1.0078	1.5924	0.2611	0.2444	0	0	-11.0478	0.00021118	Down	-3.782	0.0027934		0.66	0.54386		-1.9485	0.19622		-7.9331	0.40808		-7.9331	0.362		Unigene10348_All//gi|297839191|ref|XP_002887477.1|//2.00E-17//sugar transporter family protein [Arabidopsis lyrata subsp. lyrata] >gi|297333318|gb|EFH63736.1| sugar transporter family protein [Arabidopsis lyrata subsp. lyrata]	Unigene10348_All//7.00E-18//AT1G73220| AtOCT1 (Arabidopsis thaliana ORGANIC CATION/CARNITINE TRANSPORTER1); carbohydrate transmembrane transporter/ carnitine transporter/ transporter				GO:0006810//GO:0022891//GO:0031224//GO:0051183	nr -
Unigene103480_All	232	0.9021	0	0	0.6441	0.8906	1.168	6.014	9.368	0.6869	-9.8171	0.12274		-9.8171	0.14679		0.4675	0.82586		0.8587	0.63166		0.6394	0.10453		-3.1302	1.0853e-06	Down			Unigene103480_All//2.00E-60//gi|109874097|gb|DW503072.1|DW503072
Unigene10349_All	317	2.9709	0.1598	0.6719	1.4143	0.7604	0.2849	0.4001	0.1318	0	-4.2166	0.00013586	Down	-2.1446	0.011638		-0.8953	0.4132		-2.3116	0.078155		-1.602	0.53574		-8.6442	0.20096		Unigene10349_All//gi|15241158|ref|NP_197471.1|//5.00E-35//MATE efflux protein-related [Arabidopsis thaliana] >gi|67633808|gb|AAY78828.1| MATE efflux protein-related [Arabidopsis thaliana]	Unigene10349_All//2.00E-36//AT5G19700| MATE efflux protein-related	Unigene10349_All//2.00E-169//gi|78347917|gb|DT568191.1|DT568191			GO:0015291//GO:0015893//GO:0044464	nr -
Unigene1035_All	1492	0.1753	1.8678	0.4283	0.4007	0.7847	1.1503	1.1619	6.415	8.411	3.4134	1.0588e-10	Up	1.2888	0.1865		0.9696	0.13672		1.5214	0.0037406		2.465	1.9882e-31	Up	2.8558	5.0307e-49	Up	Unigene1035_All//gi|15218739|ref|NP_171820.1|//5.00E-23//phenazine biosynthesis PhzC/PhzF family protein [Arabidopsis thaliana] >gi|3850584|gb|AAC72124.1| ESTs gb|H37641 and gb|AA651422 come from this gene [Arabidopsis thaliana]	Unigene1035_All//6.00E-24//AT1G03210| phenazine biosynthesis PhzC/PhzF family protein	Unigene1035_All//2.00E-101//TC165972				nr -
Unigene103566_All	259	6.2623	0	0	0	0.2659	0.5231	0	0	0	-12.6125	2.1123e-09	Down	-12.6125	7.3927e-09	Down	8.0547	0.61665		9.0309	0.31293		null	null		null	null		Unigene103566_All//gi|297813081|ref|XP_002874424.1|//4.00E-06//hypothetical protein ARALYDRAFT_489647 [Arabidopsis lyrata subsp. lyrata] >gi|297320261|gb|EFH50683.1| hypothetical protein ARALYDRAFT_489647 [Arabidopsis lyrata subsp. lyrata]						nr +
Unigene10357_All	413	0	0	0	0	0	0	1.638	3.036	5.9806	null	null		null	null		null	null		null	null		0.8902	0.10176		1.8684	1.6644e-06	Up	Unigene10357_All//gi|224137294|ref|XP_002327090.1|//1.00E-32//cytochrome P450 [Populus trichocarpa] >gi|222835405|gb|EEE73840.1| cytochrome P450 [Populus trichocarpa]	Unigene10357_All//6.00E-26//AT4G31940| CYP82C4; electron carrier/ heme binding / iron ion binding / monooxygenase/ oxygen binding	Unigene10357_All//3.00E-33//TC132245		ko00945|Stilbenoid, diarylheptanoid and gingerol biosynthesis//ko00903|Limonene and pinene degradation//ko00941|Flavonoid biosynthesis//ko00944|Flavone and flavonol biosynthesis	GO:0005506//GO:0016491	nr -
Unigene10358_All	631	0.1658	2.2484	0	0.7105	1.7463	3.4356	0.8711	2.2521	1.0102	3.7614	3.9788e-06	Up	-7.3733	0.39969		1.2974	0.054564		2.2737	5.2524e-06	Up	1.3704	0.0077823		0.2137	0.77277		Unigene10358_All//gi|124359162|gb|ABN05685.1|//6.00E-08//RNA-directed DNA polymerase (Reverse transcriptase) [Medicago truncatula]		Unigene10358_All//1.00E-20//ES811125			GO:0005488	nr -
Unigene103595_All	326	22.6296	6.6834	17.4778	9.3211	9.7179	9.282	33.7204	17.4363	10.143	-1.7596	2.8044e-13	Down	-0.3727	0.1076		0.0601	0.8859		-0.0061	0.98164		-0.9515	1.1367e-09		-1.7331	5.9053e-24	Down	Unigene103595_All//gi|297807807|ref|XP_002871787.1|//7.00E-12//cobalamin-independent methionine synthase [Arabidopsis lyrata subsp. lyrata] >gi|297317624|gb|EFH48046.1| cobalamin-independent methionine synthase [Arabidopsis lyrata subsp. lyrata]		Unigene103595_All//4.00E-47//EX163984		ko00270|Cysteine and methionine metabolism	GO:0000097//GO:0005576//GO:0006970//GO:0008172//GO:0009526//GO:0009532//GO:0010038//GO:0016020//GO:0042579//GO:0046914	nr -
Unigene1036_All	492	1.8078	3.6045	0.2165	1.7212	0.4199	4.3144	4.3827	11.7232	16.3565	0.9956	0.044477		-3.0618	0.0022504		-2.0353	0.0090482		1.3257	0.0034957		1.4195	1.4464e-09	Up	1.9	8.5946e-20	Up	Unigene1036_All//gi|4263517|gb|AAD15343.1|//3.00E-30//similar to PHZF, catalyzing the hydroxylation of phenazine-1-carboxylic acid to 2-hydroxy-phenazine-1-carboxylic acid [Arabidopsis thaliana] >gi|51972158|gb|AAU15183.1| At4g02860 [Arabidopsis thaliana]	Unigene1036_All//2.00E-31//AT4G02860| catalytic	Unigene1036_All//0.00E+00//TC131623			GO:0008152	nr +
Unigene10361_All	601	0.5223	0.5059	2.6581	0	0.573	0.9769	0	0	0	-0.046	0.9851		2.3474	0.00020892	Up	9.1624	0.030164		9.9321	0.0013691		null	null		null	null		Unigene10361_All//gi|194476845|ref|YP_002049024.1|//5.00E-14//DnaB helicase:RecA bacterial DNA recombination protein [Paulinella chromatophora] >gi|171191852|gb|ACB42814.1| DnaB helicase:RecA bacterial DNA recombination protein [Paulinella chromatophora]				ko03040|Spliceosome		nr -
Unigene103677_All	1075	0	0	0	0.139	0.1281	0.084	0.7079	0	0.0371	null	null		null	null		-0.1178	0.91169		-0.7266	0.71689		-9.4674	1.677e-05	Down	-4.2541	8.6576e-05	Down	Unigene103677_All//gi|600111|emb|CAA84378.1|//1.00E-117//cysteine proteinase [Vicia sativa]	Unigene103677_All//2.00E-127//AT5G50260| cysteine proteinase, putative	Unigene103677_All//0.00E+00//TC172692				nr +
Unigene103690_All	214	3.1784	2.3677	0	5.5866	0.6437	3.7988	2.5684	1.9531	4.2817	-0.4248	0.59717		-11.6341	0.00076476	Down	-3.1175	1.5448e-05	Down	-0.5564	0.38694		-0.3951	0.63385		0.7373	0.24278
Unigene1037_All	1388	7.1244	11.3167	8.632	11.1974	8.3359	26.5188	57.0843	102.773	76.807	0.6676	2.1683e-06		0.2769	0.12493		-0.4258	0.0014257		1.2439	1.1165e-40	Up	0.8483	2.1832e-95		0.4281	3.1659e-22		Unigene1037_All//gi|4263517|gb|AAD15343.1|//1.00E-89//similar to PHZF, catalyzing the hydroxylation of phenazine-1-carboxylic acid to 2-hydroxy-phenazine-1-carboxylic acid [Arabidopsis thaliana] >gi|51972158|gb|AAU15183.1| At4g02860 [Arabidopsis thaliana]	Unigene1037_All//6.00E-91//AT4G02860| catalytic	Unigene1037_All//0.00E+00//gi|164253821|gb|ES839366.1|ES839366			GO:0008152	nr +
Unigene10371_All	634	0	0.0799	0	8.1714	2.2812	1.2822	0.3334	0.857	0.5655	6.3201	0.62288		null	null		-1.8408	3.3503e-12	Down	-2.672	9.277e-17	Down	1.362	0.14368		0.7623	0.49965		Unigene10371_All//gi|51536456|gb|AAU05466.1|//1.00E-12//At5g44660 [Arabidopsis thaliana] >gi|53828621|gb|AAU94420.1| At5g44660 [Arabidopsis thaliana] >gi|60543337|gb|AAX22266.1| At5g44650 [Arabidopsis thaliana]	Unigene10371_All//5.00E-21//AT4G20190| unknown protein	Unigene10371_All//6.00E-23//gi|73859175|gb|DT461914.1|DT461914				nr +
Unigene103722_All	213	2.2107	3.3304	1.75	17.0725	12.2868	2.1203	0.397	0.1962	0	0.5912	0.47809		-0.3371	0.73398		-0.4746	0.14096		-3.0093	2.0892e-13	Down	-1.0168	0.72688		-8.633	0.36192
Unigene10374_All	418	2.5034	0	0.3822	9.5338	5.5195	1.8368	1.5172	0	1.239	-11.2897	3.8049e-06	Down	-2.7115	0.001649		-0.7885	0.0060084		-2.3759	1.9809e-11	Down	-10.5672	0.00012354	Down	-0.2922	0.68394
Unigene10375_All	513	0.7139	0.7902	0.2076	1.2623	2.2823	1.3206	4.2857	5.2143	9.552	0.1465	0.89842		-1.7819	0.23408		0.8544	0.19123		0.0651	0.94966		0.2829	0.44584		1.1563	2.0695e-06	Up	Unigene10375_All//gi|297827079|ref|XP_002881422.1|//8.00E-37//abscisic acid-responsive HVA22 family protein [Arabidopsis lyrata subsp. lyrata] >gi|297327261|gb|EFH57681.1| abscisic acid-responsive HVA22 family protein [Arabidopsis lyrata subsp. lyrata]	Unigene10375_All//5.00E-38//AT2G36020| HVA22J (HVA22-LIKE PROTEIN J)	Unigene10375_All//4.00E-119//ES833630			GO:0004871//GO:0044464	nr +
Unigene10376_All	767	0.955	0.2642	0.5554	3.8319	1.6612	1.8843	0.7166	0.5994	0.5713	-1.8539	0.040816		-0.782	0.38009		-1.2058	0.0004513	Down	-1.024	0.0048072		-0.2576	0.76005		-0.3269	0.67187		Unigene10376_All//gi|38346596|emb|CAE04660.2|//2.00E-06//OSJNBa0061G20.16 [Oryza sativa (japonica cultivar-group)]						nr +
Unigene103773_All	1190	0	0.3832	0.9845	0.2093	0.5787	10.8164	226.998	95.6736	504.913	8.582	0.0074451		9.9432	1.7733e-06	Up	1.4672	0.11566		5.6915	4.1119e-70	Up	-1.2465	0	Down	1.1534	0	Up	Unigene103773_All//gi|124365601|gb|AAK50778.4|AF361893_1//1.00E-146//bacterial-induced lipoxygenase [Gossypium hirsutum]	Unigene103773_All//3.00E-127//AT3G22400| LOX5; electron carrier/ iron ion binding / lipoxygenase/ metal ion binding / oxidoreductase, acting on single donors with incorporation of molecular oxygen, incorporation of two atoms of oxygen	Unigene103773_All//0.00E+00//gi|164244850|gb|ES799168.1|ES799168		ko00592|alpha-Linolenic acid metabolism//ko00591|Linoleic acid metabolism		nr +
Unigene1038_All	1132	7.3027	5.8637	8.4203	7.5689	19.8946	10.7323	1.1205	0.7754	1.0558	-0.3166	0.12971		0.2054	0.33443		1.3942	1.557e-32	Up	0.5038	0.0017387		-0.5311	0.34349		-0.0858	0.87187		Unigene1038_All//gi|269980442|gb|ACZ56416.1|//1.00E-134//ankyrin-like protein [Vitis vinifera]	Unigene1038_All//6.00E-120//AT3G01750| ankyrin repeat family protein	Unigene1038_All//0.00E+00//gi|78354540|gb|DT574814.1|DT574814				nr +
Unigene103802_All	367	0	0.5523	2.4666	5.8365	4.41	3.0765	1.152	2.1638	0.7599	9.1093	0.13746		11.2683	4.7146e-05	Up	-0.4043	0.37453		-0.9238	0.036191		0.9094	0.21129		-0.6003	0.55318				Unigene103802_All//6.00E-77//gi|109890213|gb|DW519177.1|DW519177
Unigene10382_All	346	6.6535	2.1967	2.1546	0.4319	0.5971	0.3916	0	0	0	-1.5988	0.00034546	Down	-1.6267	0.00050206	Down	0.4673	0.82584		-0.1413	0.94434		null	null		null	null				Unigene10382_All//1.00E-07//DT048782
Unigene103835_All	298	0	0	2.1443	0	0	3.3342	0	0	0	null	null		11.0663	0.0011611		null	null		11.7031	6.1484e-06	Up	null	null		null	null		Unigene103835_All//gi|124359981|gb|ABN07997.1|//1.00E-08//contains similarity to reverse trancriptase , related [Medicago truncatula]		Unigene103835_All//3.00E-07//gi|78324173|gb|DT544447.1|DT544447				nr +
Unigene103839_All	227	2.7659	0	0	0.4389	0	0.5969	0.3725	1.1047	0.1755	-11.4335	0.00079212	Down	-11.4335	0.0014105		-8.7777	0.31771		0.4436	0.86312		1.5683	0.32682		-1.0858	0.67811
Unigene10385_All	655	0	0	0	0	0	0	5.6158	1.0848	0.9732	null	null		null	null		null	null		null	null		-2.3721	5.0775e-12	Down	-2.5287	2.3657e-13	Down							ESTscan -
Unigene103855_All	317	0.3301	3.996	0.168	1.2571	1.5208	2.2795	0.1334	0.1318	0	3.5976	2.2738e-05	Up	-0.9744	0.72256		0.2747	0.81976		0.8586	0.34205		-0.0174	1.0073		-7.0596	0.61881		Unigene103855_All//gi|115476212|ref|NP_001061702.1|//1.00E-48//Os08g0384500 [Oryza sativa Japonica Group] >gi|113623671|dbj|BAF23616.1| Os08g0384500 [Oryza sativa Japonica Group]	Unigene103855_All//5.00E-47//AT1G15520| PDR12 (PLEIOTROPIC DRUG RESISTANCE 12); ATPase, coupled to transmembrane movement of substances	Unigene103855_All//4.00E-59//TC147767		ko03040|Spliceosome//ko02010|ABC transporters	GO:0032559//GO:0042626//GO:0043231	nr +
Unigene10386_All	407	0	6.8472	4.1867	0	0	0	0	0	0	12.7413	7.4352e-16	Up	12.0316	2.201e-09	Up	null	null		null	null		null	null		null	null		Unigene10386_All//sp|P17275|JUNB_HUMAN//6.00E-26//Transcription factor jun-B OS=Homo sapiens GN=JUNB PE=1 SV=1						swissprot +
Unigene10387_All	422	1.3638	0.2401	2.019	2.1248	1.1424	0.8562	4.0076	1.0895	3.3986	-2.5059	0.029369		0.566	0.46105		-0.8953	0.21412		-1.3113	0.085234		-1.8791	0.00013256	Down	-0.2378	0.59384		Unigene10387_All//gi|21901929|emb|CAC86383.1|//2.00E-11//carboxypeptidase type III [Theobroma cacao]	Unigene10387_All//2.00E-08//AT3G10410| scpl49 (serine carboxypeptidase-like 49); serine-type carboxypeptidase	Unigene10387_All//2.00E-46//gi|11206118|gb|BF275048.1|BF275048		ko00940|Phenylpropanoid biosynthesis	GO:0004180//GO:0019538//GO:0043231	nr -
Unigene10388_All	417	0	4.0098	0.5108	2.5086	3.7986	3.7907	0	1.1025	0	11.9693	1.5392e-09	Up	8.9966	0.14204		0.5986	0.28696		0.5956	0.28918		10.1066	0.0019408		null	null		Unigene10388_All//gi|255562741|ref|XP_002522376.1|//8.00E-08//conserved hypothetical protein [Ricinus communis] >gi|223538454|gb|EEF40060.1| conserved hypothetical protein [Ricinus communis]		Unigene10388_All//5.00E-16//TC168014				nr +
Unigene10390_All	676	0.3096	0	0	0.8106	1.0188	0	2.1265	0.1855	0.7661	-8.2743	0.12273		-8.2743	0.14678		0.3298	0.75239		-9.6628	0.00152		-3.519	3.1859e-07	Down	-1.4729	0.0030854		Unigene10390_All//gi|15224831|ref|NP_181947.1|//3.00E-40//EDE1 (ENDOSPERM DEFECTIVE 1); microtubule binding [Arabidopsis thaliana] >gi|63003848|gb|AAY25453.1| At2g44190 [Arabidopsis thaliana]	Unigene10390_All//1.00E-40//AT2G44190| EDE1 (ENDOSPERM DEFECTIVE 1); microtubule binding	Unigene10390_All//0.00E+00//TC170349			GO:0003006//GO:0005874//GO:0007349//GO:0009791//GO:0009987//GO:0015631//GO:0043231	nr +
Unigene10391_All	528	0	125.906	50.3253	0	0.1304	0	0	0	0	16.942	0	Up	15.619	1.6998e-150	Up	7.0268	0.61654		null	null		null	null		null	null		Unigene10391_All//gi|223995201|ref|XP_002287284.1|//2.00E-16//RL14, ribosomal protein 14 60S large ribosomal subunit [Thalassiosira pseudonana CCMP1335] >gi|220976400|gb|EED94727.1| RL14, ribosomal protein 14 60S large ribosomal subunit [Thalassiosira pseudonana CCMP1335]	Unigene10391_All//6.00E-12//AT2G20450| 60S ribosomal protein L14 (RPL14A)			ko03010|Ribosome	GO:0044424	nr -
Unigene103930_All	395	0	3.9766	0.1348	0.1261	0.2615	0.1143	4.0675	3.386	4.236	11.9573	5.706e-09	Up	7.0747	0.64222		1.0522	0.81002		-0.1417	0.95717		-0.2646	0.61544		0.0586	0.91208		Unigene103930_All//gi|225436241|ref|XP_002275171.1|//8.00E-16//PREDICTED: hypothetical protein [Vitis vinifera]		Unigene103930_All//6.00E-176//gi|84174516|gb|DR463164.1|DR463164			GO:0000166	nr +
Unigene10395_All	867	0.4828	16.7145	0.4299	0.2298	1.3901	0.2084	0.1463	0	0.1838	5.1135	1.261e-70	Up	-0.1674	0.87929		2.5967	0.00034093	Up	-0.141	0.9357		-7.1928	0.23685		0.3292	0.85201		Unigene10395_All//gi|224069539|ref|XP_002326368.1|//3.00E-27//SAUR family protein [Populus trichocarpa] >gi|222833561|gb|EEE72038.1| SAUR family protein [Populus trichocarpa]	Unigene10395_All//3.00E-20//AT3G09870| auxin-responsive family protein	Unigene10395_All//0.00E+00//TC150348				nr -
Unigene103975_All	362	0	0	0	0	0.0951	0	3.9711	1.0391	0.1101	null	null		null	null		6.5714	0.8404		null	null		-1.9342	0.00037779	Down	-5.1727	2.0939e-09	Down	Unigene103975_All//gi|18396925|ref|NP_566232.1|//1.00E-21//DNA-binding protein-related [Arabidopsis thaliana] >gi|29028876|gb|AAO64817.1| At3g04570 [Arabidopsis thaliana] >gi|119657382|tpd|FAA00290.1| TPA: AT-hook motif nuclear localized protein 19 [Arabidopsis thaliana]	Unigene103975_All//1.00E-07//AT3G04570| DNA-binding protein-related	Unigene103975_All//3.00E-57//DW502620				nr -
Unigene103977_All	503	0.104	1.0073	2.1173	0.5942	0.89	0.9877	0	0	0.0792	3.2758	0.021074		4.3476	6.4582e-05	Up	0.5829	0.62631		0.7331	0.51599		null	null		6.3074	0.64894		Unigene103977_All//gi|270342124|gb|ACZ74707.1|//2.00E-44//carbonic anhydrase [Phaseolus vulgaris]	Unigene103977_All//4.00E-44//AT5G14740| CA2 (CARBONIC ANHYDRASE 2); carbonate dehydratase/ zinc ion binding	Unigene103977_All//4.00E-162//TC141146		ko00910|Nitrogen metabolism		nr -
Unigene10398_All	1740	0	0	0	0.0573	0	0	1.2635	1.5613	5.8384	null	null		null	null		-5.8405	0.31769		-5.8405	0.40583		0.3053	0.39817		2.2081	6.8154e-30	Up	Unigene10398_All//gi|115485949|ref|NP_001068118.1|//1.00E-104//Os11g0569600 [Oryza sativa Japonica Group] >gi|113645340|dbj|BAF28481.1| Os11g0569600 [Oryza sativa Japonica Group]	Unigene10398_All//2.00E-92//AT3G47570| leucine-rich repeat transmembrane protein kinase, putative	Unigene10398_All//4.00E-23//TC151383		ko04626|Plant-pathogen interaction		nr +
Unigene10399_All	542	0	0	0	0	0	0	4.9145	6.4005	0	null	null		null	null		null	null		null	null		0.3811	0.22412		-12.2628	1.3374e-19	Down	Unigene10399_All//gi|195618110|gb|ACG30885.1|//2.00E-27//translationally-controlled tumor protein [Zea mays] >gi|195618316|gb|ACG30988.1| translationally-controlled tumor protein [Zea mays]	Unigene10399_All//7.00E-28//AT3G05540| INVOLVED IN: biological_process unknown; LOCATED IN: cytoplasm; CONTAINS InterPro DOMAIN/s: Translationally controlled tumour protein (InterPro:IPR018105), Translationally controlled tumour-associated TCTP (InterPro:IPR001983), Mss4/translationally controlled tumour-associated TCTP (InterPro:IPR011323), Translationally controlled tumour protein, conserved si…				GO:0000904//GO:0005488//GO:0005576//GO:0006952//GO:0009536//GO:0010038//GO:0016020//GO:0016049//GO:0048528//GO:0048878	nr +
Unigene103996_All	204	0.2565	1.2419	0	0.4884	0.844	2.8781	5.1814	1.8439	0	2.2755	0.23413		-8.0028	0.63441		0.7892	0.77195		2.559	0.028732		-1.4906	0.016388		-12.3391	6.7265e-08	Down	Unigene103996_All//gi|46396756|sp|P93194.2|RPK1_IPONI//1.00E-11//RecName: Full=Receptor-like protein kinase; Flags: Precursor >gi|14495542|gb|AAB36558.2| receptor-like protein kinase INRPK1 [Ipomoea nil]	Unigene103996_All//3.00E-11//AT1G73066| protein binding			ko04626|Plant-pathogen interaction		nr +
Unigene103999_All	272	74.2494	16.9519	61.2766	20.5117	28.9915	14.6117	1.399	0.922	0.4394	-2.1309	3.4751e-45	Down	-0.277	0.036554		0.4992	0.013637		-0.4893	0.056731		-0.6016	0.61284		-1.6708	0.14053		Unigene103999_All//gi|229893912|gb|ACQ90301.1|//1.00E-34//squalene epoxidase [Gynostemma pentaphyllum]	Unigene103999_All//4.00E-33//AT4G37760| SQE3 (squalene epoxidase 3); squalene monooxygenase	Unigene103999_All//6.00E-101//gi|48795641|gb|CO096955.1|CO096955		ko00100|Steroid biosynthesis		nr +
Unigene1040_All	2495	20.0685	6.2956	11.0128	37.5154	33.6624	10.2817	21.1147	8.7444	8.6863	-1.6725	2.9829e-80	Down	-0.8658	9.1695e-28		-0.1563	0.0030712		-1.8674	6.9185e-190	Down	-1.2718	1.1009e-68	Down	-1.2814	1.699e-71	Down	Unigene1040_All//gi|269980442|gb|ACZ56416.1|//0.00E+00//ankyrin-like protein [Vitis vinifera]	Unigene1040_All//0.00E+00//AT3G01750| ankyrin repeat family protein	Unigene1040_All//0.00E+00//TC151204				nr +
Unigene10400_All	551	0.3798	1.1035	0.0966	4.3395	3.8748	0.2459	0.1535	0.8344	1.2291	1.5388	0.12199		-1.9751	0.38176		-0.1634	0.72308		-4.1414	1.4944e-11	Down	2.4425	0.03745		3.0013	0.0020031		Unigene10400_All//gi|15233416|ref|NP_193816.1|//9.00E-32//FAD-binding domain-containing protein [Arabidopsis thaliana] >gi|5262224|emb|CAB45850.1| reticuline oxidase-like protein [Arabidopsis thaliana] >gi|7268880|emb|CAB79084.1| reticuline oxidase-like protein [Arabidopsis thaliana] >gi|222424693|dbj|BAH20300.1| AT4G20840 [Arabidopsis thaliana]	Unigene10400_All//4.00E-41//AT4G20840| FAD-binding domain-containing protein	Unigene10400_All//0.00E+00//TC153608			GO:0005576//GO:0005618//GO:0006950//GO:0016020//GO:0043231	nr -
Unigene10401_All	349	0	2.6133	1.0681	0	0	0	0	0	0	11.3517	2.6213e-05	Up	10.0608	0.02505		null	null		null	null		null	null		null	null		Unigene10401_All//sp|P13395|SPTCA_DROME//6.00E-61//Spectrin alpha chain OS=Drosophila melanogaster GN=alpha-Spec PE=1 SV=2	Unigene10401_All//6.00E-05//AT5G37780| CAM1 (CALMODULIN 1); calcium ion binding			ko04626|Plant-pathogen interaction		swissprot -
Unigene10405_All	618	0.254	0.328	2.8434	0	0.6686	0.0731	0	0	0	0.3689	0.81701		3.4847	8.8746e-07	Up	9.385	0.012499		6.1918	0.70412		null	null		null	null		Unigene10405_All//gi|168069625|ref|XP_001786518.1|//1.00E-15//sensory histidine protein kinase [Physcomitrella patens subsp. patens] >gi|162661105|gb|EDQ48669.1| sensory histidine protein kinase [Physcomitrella patens subsp. patens]	Unigene10405_All//4.00E-09//AT5G10720| AHK5 (ARABIDOPSIS HISTIDINE KINASE 5); protein histidine kinase		Orphans		GO:0016301//GO:0044237//GO:0044238	nr -
Unigene104056_All	549	0	0.4615	4.7527	0	0	1.1517	0	0	0	8.8502	0.07891		12.2145	2.124e-14	Up	null	null		10.1695	0.00076035	Up	null	null		null	null		Unigene104056_All//gi|56900734|gb|AAW31667.1|//4.00E-78//ribulose-1,5-bisphosphate carboxylase/oxygenase small subunit [Ammopiptanthus mongolicus]	Unigene104056_All//4.00E-77//AT5G38430| ribulose bisphosphate carboxylase small chain 1B / RuBisCO small subunit 1B (RBCS-1B) (ATS1B)	Unigene104056_All//1.00E-20//gi|109886204|gb|DW515174.1|DW515174		ko00710|Carbon fixation in photosynthetic organisms//ko00630|Glyoxylate and dicarboxylate metabolism		nr +
Unigene10406_All	823	0.1271	132.184	103.135	0.3632	0.5439	0.6585	0.3596	0.1016	0.4841	10.0224	0	Up	9.6644	0	Up	0.5826	0.6263		0.8584	0.42332		-1.8235	0.21121		0.4289	0.66168		Unigene10406_All//gi|150406463|ref|YP_001315116.1|//7.00E-56//cytochrome c oxidase subunit 2 [Chlorokybus atmophyticus] >gi|126507700|gb|ABO15097.1| cytochrome c oxidase subunit 2 [Chlorokybus atmophyticus]	Unigene10406_All//4.00E-35//ATMG00160| cytochrome c oxidase subunit 2			ko00190|Oxidative phosphorylation	GO:0016020//GO:0046872//GO:0055114	nr -
Unigene104075_All	790	29.2069	19.0491	21.7044	14.692	11.5075	6.9174	2.0337	1.5343	0.6556	-0.6166	6.0976e-08		-0.4283	0.00029008		-0.3525	0.031636		-1.0867	6.6957e-11	Down	-0.4065	0.39532		-1.6332	0.00060203	Down	Unigene104075_All//gi|297727877|ref|NP_001176302.1|//6.00E-10//Os11g0106066 [Oryza sativa Japonica Group] >gi|255679693|dbj|BAH95030.1| Os11g0106066 [Oryza sativa Japonica Group]		Unigene104075_All//1.00E-46//ES795234				nr -
Unigene10408_All	824	0	15.8649	4.8468	0	0	0	0	0	0	13.9536	5.01e-75	Up	12.2428	3.8274e-22	Up	null	null		null	null		null	null		null	null		Unigene10408_All//gi|255081672|ref|XP_002508058.1|//8.00E-71//peptidylprolyl isomerase, precursor [Micromonas sp. RCC299] >gi|226523334|gb|ACO69316.1| peptidylprolyl isomerase, precursor [Micromonas sp. RCC299]	Unigene10408_All//6.00E-50//AT5G13120| peptidyl-prolyl cis-trans isomerase cyclophilin-type family protein				GO:0016853//GO:0031410//GO:0043231	nr -
Unigene104081_All	268	0	0	0	1.1152	1.0279	9.6056	0.9466	3.275	1.1892	null	null		null	null		-0.1176	0.90076		3.1066	1.3669e-09	Up	1.7907	0.012726		0.3292	0.76378		Unigene104081_All//gi|22329131|ref|NP_195096.2|//5.00E-18//CBS domain-containing protein [Arabidopsis thaliana] >gi|17381276|gb|AAL36056.1| AT4g33700/T16L1_190 [Arabidopsis thaliana] >gi|20856058|gb|AAM26645.1| AT4g33700/T16L1_190 [Arabidopsis thaliana]	Unigene104081_All//2.00E-19//AT4G33700| CBS domain-containing protein	Unigene104081_All//7.00E-42//TC133787				nr +
Unigene104087_All	216	1.4534	10.5561	1.4792	1.1531	2.2319	1.6727	10.9615	12.1904	49.245	2.8606	1.2844e-07	Up	0.0254	1.0027		0.9528	0.42368		0.5367	0.69459		0.1533	0.67636		2.1675	1.4417e-30	Up			Unigene104087_All//2.00E-63//TC139645
Unigene10409_All	278	0	15.3102	4.0225	0	0	0	0	0	0	13.9022	3.0386e-24	Up	11.9739	3.4361e-06	Up	null	null		null	null		null	null		null	null
Unigene104096_All	237	0.4415	7.0552	0.2247	0	0	1.1434	0	0	0	3.9982	2.0781e-07	Up	-0.9744	0.72252		null	null		10.1591	0.070594		null	null		null	null				Unigene104096_All//3.00E-19//FL576574
Unigene1041_All	2453	10.686	7.0644	6.5776	6.5796	14.3469	10.1079	0.4309	1.0053	0.9582	-0.5971	1.8534e-08		-0.7001	1.8441e-10		1.1247	1.7519e-36	Up	0.6194	6.1743e-09		1.2222	0.00090072	Up	1.153	0.0016593		Unigene1041_All//gi|269980442|gb|ACZ56416.1|//0.00E+00//ankyrin-like protein [Vitis vinifera]	Unigene1041_All//8.00E-180//AT3G01750| ankyrin repeat family protein	Unigene1041_All//0.00E+00//TC151607				nr -
Unigene10411_All	578	2.9872	0.789	3.4087	0.948	0.7149	0.4688	1.0241	1.157	0.1378	-1.9207	0.0004673	Down	0.1904	0.6773		-0.4071	0.65812		-1.0159	0.32958		0.176	0.81519		-2.8937	0.0045373
Unigene10412_All	384	0	7.2573	2.3574	0	0	0	0	0	0	12.8252	7.4343e-16	Up	11.203	4.7143e-05	Up	null	null		null	null		null	null		null	null		Unigene10412_All//sp|Q69566|U88_HHV6U//1.00E-09//Uncharacterized protein U88 OS=Human herpesvirus 6A (strain Uganda-1102) GN=U88 PE=4 SV=1						swissprot -
Unigene10414_All	741	0	0	0	0.4034	0.2788	0.2438	7.7029	2.0306	1.2903	null	null		null	null		-0.533	0.67909		-0.7265	0.63935		-1.9235	3.4051e-14	Down	-2.5777	9.9779e-21	Down			Unigene10414_All//2.00E-13//TC166793
Unigene10415_All	564	0	0	0	0	0	0	1.7992	5.4838	0	null	null		null	null		null	null		null	null		1.6078	1.9992e-06	Up	-10.8131	1.3528e-07	Down
Unigene10418_All	385	10.6001	11.8448	13.4162	26.2657	18.604	26.1596	322.977	424.797	678.292	0.1602	0.6183		0.3399	0.23299		-0.4976	0.0034171		-0.0058	0.97128		0.3953	2.2147e-28		1.0705	7.2281e-262	Up			Unigene10418_All//1.00E-152//gi|164253602|gb|ES824425.1|ES824425
Unigene104194_All	325	27.0458	2.6504	4.26	28.3558	11.8669	10.5613	18.3431	1.8004	0.7355	-3.3511	1.8559e-32	Down	-2.6665	7.8711e-25	Down	-1.2567	2.9318e-12	Down	-1.4249	4.1243e-13	Down	-3.3488	4.9431e-27	Down	-4.6404	1.6259e-35	Down	Unigene104194_All//gi|15236175|ref|NP_194362.1|//2.00E-07//AGP13 (arabinogalactan protein 13) [Arabidopsis thaliana] >gi|75207711|sp|Q9STQ3.1|AGP13_ARATH RecName: Full=Arabinogalactan peptide 13; Short=AG-peptide 13; Flags: Precursor >gi|10880503|gb|AAG24281.1|AF195894_1 arabinogalactan protein [Arabidopsis thaliana] >gi|89111816|gb|ABD60680.1| At4g26320 [Arabidopsis thaliana]		Unigene104194_All//5.00E-71//gi|21094474|gb|BQ406799.1|BQ406799				nr -
Unigene104197_All	334	0	0.1517	0	0.2983	0.4124	0.2704	6.456	46.3007	1.7892	7.2451	0.62267		null	null		0.4673	0.87817		-0.1417	0.95326		2.8423	7.5021e-59	Up	-1.8513	8.4696e-06	Down	Unigene104197_All//gi|15220954|ref|NP_174363.1|//1.00E-32//FAD-binding domain-containing protein [Arabidopsis thaliana] >gi|16323167|gb|AAL15318.1| At1g30760/T5I8_22 [Arabidopsis thaliana] >gi|28416457|gb|AAO42759.1| At1g30760/T5I8_22 [Arabidopsis thaliana]	Unigene104197_All//5.00E-34//AT1G30760| FAD-binding domain-containing protein	Unigene104197_All//6.00E-09//TC166754				nr +
Unigene1042_All	3284	6.2135	62.5499	13.1828	8.722	35.6516	50.9945	29.2125	161.876	260.771	3.3315	0	Up	1.0852	7.0137e-35	Up	2.0312	5.4796e-285	Up	2.5476	0	Up	2.4702	0	Up	3.1581	0	Up	Unigene1042_All//gi|15224213|ref|NP_179460.1|//0.00E+00//ATTPS11; transferase, transferring glycosyl groups [Arabidopsis thaliana] >gi|75216907|sp|Q9ZV48.1|TPS11_ARATH RecName: Full=Probable alpha,alpha-trehalose-phosphate synthase [UDP-forming] 11; AltName: Full=Trehalose-6-phosphate synthase 11; Short=AtTPS11	Unigene1042_All//0.00E+00//AT2G18700| ATTPS11; transferase, transferring glycosyl groups	Unigene1042_All//0.00E+00//TC176400		ko00500|Starch and sucrose metabolism	GO:0005991//GO:0019203//GO:0035251//GO:0043231	nr +
Unigene10420_All	671	0	0	0	0	0	0	1.7643	4.9831	0	null	null		null	null		null	null		null	null		1.4979	2.7269e-06	Up	-10.7849	8.1517e-09	Down	Unigene10420_All//gi|115469274|ref|NP_001058236.1|//3.00E-19//Os06g0652600 [Oryza sativa Japonica Group] >gi|51535038|dbj|BAD37409.1| fibroin heavy chain precursor-like [Oryza sativa Japonica Group] >gi|113596276|dbj|BAF20150.1| Os06g0652600 [Oryza sativa Japonica Group]				ko03040|Spliceosome//ko03018|RNA degradation	GO:0044464	nr +
Unigene104210_All	261	3.6083	2.1355	2.0402	7.4435	2.3748	4.499	1.9439	1.7615	0.6106	-0.7567	0.28622		-0.8226	0.27076		-1.6482	0.00027301	Down	-0.7264	0.12653		-0.1421	0.87589		-1.6707	0.07784				Unigene104210_All//1.00E-74//DW498863
Unigene10422_All	393	0.2663	0.5157	0	3.8026	3.8553	1.379	2.1517	0.2127	0.3041	0.9535	0.62253		-8.0569	0.39951		0.0199	0.98536		-1.4634	0.0088963		-3.3386	0.00025154	Down	-2.8229	0.00053785	Down	Unigene10422_All//gi|124360202|gb|ABN08215.1|//1.00E-67//Zinc finger, CCCH-type [Medicago truncatula]	Unigene10422_All//6.00E-68//AT2G41900| zinc finger (CCCH-type) family protein	Unigene10422_All//4.00E-32//TC132093	C3H		GO:0001071//GO:0010468//GO:0044424//GO:0046914	nr +
Unigene104239_All	267	3.3313	10.4375	7.1798	13.9928	13.9289	11.164	9.0261	7.0442	10.2954	1.6476	4.82e-05	Up	1.1079	0.025268		-0.0066	0.9729		-0.3258	0.3515		-0.3577	0.3669		0.1898	0.6153				Unigene104239_All//8.00E-88//gi|13243815|gb|BE053182.2|BE053182
Unigene10425_All	734	0	5.1084	1.451	0	0	0	0	0	0	12.3187	2.4029e-21	Up	10.5028	6.6281e-06	Up	null	null		null	null		null	null		null	null								ESTscan -
Unigene10427_All	438	0	0.5784	0.2432	0	0.2359	0.2062	0.1931	2.2902	0.1819	9.1759	0.078907		7.926	0.40286		7.882	0.45884		7.6879	0.48187		3.5681	3.0759e-05	Up	-0.0862	0.97406		Unigene10427_All//gi|267124|sp|P29449.1|TRXH1_TOBAC//2.00E-06//RecName: Full=Thioredoxin H-type 1; Short=Trx-H1 >gi|20047|emb|CAA41415.1| thioredoxin [Nicotiana tabacum]		Unigene10427_All//3.00E-33//EX167848				nr -
Unigene104270_All	402	0	0	0	0	0.0857	4.2692	0	0	0	null	null		null	null		6.4212	0.84028		12.0598	3.1206e-10	Up	null	null		null	null		Unigene104270_All//gi|146160694|gb|ABQ08576.1|//3.00E-06//alpha-gliadin [Australopyrum retrofractum]				ko00760|Nicotinate and nicotinamide metabolism		nr -
Unigene10428_All	337	0	9.0213	0	0.5913	1.2262	1.8762	0	0	1.3004	13.1391	2.6751e-17	Up	null	null		1.0522	0.426		1.6659	0.097977		null	null		10.3447	0.0021376		Unigene10428_All//gi|2245113|emb|CAB10535.1|//9.00E-15//glycerol-3-phosphate permease like protein [Arabidopsis thaliana] >gi|7268507|emb|CAB78758.1| glycerol-3-phosphate permease like protein [Arabidopsis thaliana]	Unigene10428_All//4.00E-16//AT4G17550| transporter-related				GO:0006810//GO:0009987//GO:0043231	nr +
Unigene10429_All	980	0.1068	0.3102	0.326	0.8133	0.7028	0.2304	4.2712	4.6487	1.2195	1.5383	0.32362		1.61	0.30515		-0.2107	0.80648		-1.8196	0.033215		0.1222	0.65413		-1.8084	3.5564e-10	Down	Unigene10429_All//gi|44888124|sp|P93308.1|M530_ARATH//2.00E-30//RecName: Full=Uncharacterized mitochondrial protein AtMg00530; AltName: Full=ORF109	Unigene10429_All//3.00E-27//ATMG00530| hypothetical protein	Unigene10429_All//0.00E+00//gi|109854544|gb|DW483523.1|DW483523			GO:0043231	nr +
Unigene10430_All	582	0.2697	0.0871	0.0915	0.5135	0.1183	0.3104	1.235	2.3699	4.3809	-1.6306	0.48924		-1.5595	0.5342		-2.1179	0.16565		-0.7262	0.63934		0.9403	0.067105		1.8267	1.6271e-06	Up			Unigene10430_All//9.00E-25//TC149710
Unigene10431_All	726	0	0	0	0	0.0949	0	0.8153	1.7271	5.4325	null	null		null	null		6.5683	0.61638		null	null		1.0829	0.04695		2.7362	3.1358e-15	Up	Unigene10431_All//gi|284026888|gb|ADB66335.1|//4.00E-40//CC-NBS-LRR protein [Quercus suber]	Unigene10431_All//4.00E-17//AT3G14460| disease resistance protein (NBS-LRR class), putative					nr +
Unigene104310_All	274	72.5617	40.4986	49.9462	119.99	131.834	166.808	144.894	79.9305	64.7014	-0.8413	2.1793e-11		-0.5388	2.386e-05		0.1358	0.16794		0.4753	4.0684e-10		-0.8582	1.1062e-27		-1.1631	1.5226e-46	Down	Unigene104310_All//gi|195620934|gb|ACG32297.1|//6.00E-36//60S ribosomal protein L23 [Zea mays]	Unigene104310_All//1.00E-36//AT3G04400| emb2171 (embryo defective 2171); structural constituent of ribosome	Unigene104310_All//6.00E-135//TC154590		ko03010|Ribosome		nr -
Unigene104330_All	277	5.0999	7.8657	6.9206	20.3213	14.9178	7.8261	3.5106	2.8669	3.0203	0.6251	0.14957		0.4404	0.38649		-0.446	0.071539		-1.3766	7.4039e-08	Down	-0.2922	0.63069		-0.217	0.70684				Unigene104330_All//7.00E-141//TC137783				ESTscan -
Unigene104332_All	307	0.6817	14.194	3.9894	0.4868	0.673	6.1787	0.2754	0.2723	1.1679	4.38	1.096e-19	Up	2.549	0.00082502	Up	0.4673	0.82581		3.6659	3.4835e-08	Up	-0.0163	1.0161		2.0843	0.10105		Unigene104332_All//gi|44681328|gb|AAS47604.1|//5.00E-24//At4g15670 [Arabidopsis thaliana] >gi|45773840|gb|AAS76724.1| At4g15670 [Arabidopsis thaliana]	Unigene104332_All//3.00E-25//AT5G18600| glutaredoxin family protein	Unigene104332_All//4.00E-56//gi|109866735|gb|DW495711.1|DW495711				nr -
Unigene104349_All	239	0	0.424	0	0	0.2882	1.7007	25.1204	55.4362	226.697	8.7279	0.39112		null	null		8.1709	0.61636		10.7319	0.013645		1.142	3.5685e-15	Up	3.1738	8.9385e-233	Up	Unigene104349_All//gi|224092400|ref|XP_002309592.1|//5.00E-14//2-oxoglutarate-dependent dioxygenase [Populus trichocarpa] >gi|222855568|gb|EEE93115.1| 2-oxoglutarate-dependent dioxygenase [Populus trichocarpa]	Unigene104349_All//1.00E-13//AT1G52800| oxidoreductase, 2OG-Fe(II) oxygenase family protein	Unigene104349_All//2.00E-82//TC144167				nr -
Unigene10436_All	629	0	10.4722	8.2118	0	0	0.1436	0	0	0	13.3543	1.258e-37	Up	13.0035	9.6167e-29	Up	null	null		7.1659	0.48182		null	null		null	null		Unigene10436_All//sp|P08727|K1C19_HUMAN//3.00E-90//Keratin, type I cytoskeletal 19 OS=Homo sapiens GN=KRT19 PE=1 SV=3						swissprot -
Unigene104378_All	241	0.2171	3.7844	0.4419	0.8268	3.4292	0.937	0.3509	0.3469	0.3306	4.1236	0.00023367	Up	1.0254	0.7049		2.0523	0.017926		0.1805	0.93573		-0.0165	1.0161		-0.086	0.97402
Unigene10439_All	750	0	7.2964	5.396	0	0	0	0	0	0	12.833	3.2468e-31	Up	12.3977	1.9222e-22	Up	null	null		null	null		null	null		null	null		Unigene10439_All//gi|300147461|gb|EFJ14125.1|//3.00E-06//hypothetical protein SELMODRAFT_446044 [Selaginella moellendorffii]	Unigene10439_All//6.00E-06//AT1G56040| binding / protein binding / ubiquitin-protein ligase					nr +
Unigene104391_All	280	0.7474	0	0.7607	0	0.7379	2.9034	0.453	0	0.2846	-9.5457	0.12273		0.0254	1.0039		9.5273	0.15749		11.5035	6.956e-05	Up	-8.8234	0.23683		-0.6706	0.72113		Unigene104391_All//gi|297842799|ref|XP_002889281.1|//4.00E-23//kinase family protein [Arabidopsis lyrata subsp. lyrata] >gi|297335122|gb|EFH65540.1| kinase family protein [Arabidopsis lyrata subsp. lyrata]	Unigene104391_All//3.00E-24//AT1G80640| protein kinase family protein	Unigene104391_All//4.00E-96//TC158373		ko04626|Plant-pathogen interaction		nr -
Unigene10441_All	835	0	48.1815	12.882	0	0	0	0	0	0	15.5562	3.1491e-232	Up	13.6531	2.0594e-60	Up	null	null		null	null		null	null		null	null		Unigene10441_All//gi|195611912|gb|ACG27786.1|//2.00E-79//40S ribosomal protein SA [Zea mays]	Unigene10441_All//3.00E-73//AT1G72370| P40; structural constituent of ribosome			ko03010|Ribosome	GO:0005198//GO:0010467//GO:0033279	nr +
Unigene104422_All	496	0.6329	0.5108	0.3221	2.8121	1.0414	0.5463	2.7278	1.1797	0.9638	-0.3092	0.78948		-0.9745	0.50609		-1.4331	0.0086459		-2.3639	0.00023785	Down	-1.2093	0.020819		-1.5009	0.0037204				Unigene104422_All//7.00E-127//TC158572
Unigene10443_All	482	0.9769	0.5256	1.9886	0.5167	2.3576	4.685	0	0	0.1653	-0.8942	0.38866		1.0255	0.1677		2.1899	0.0021552		3.1807	1.2218e-08	Up	null	null		7.3689	0.4063		Unigene10443_All//gi|224060417|ref|XP_002300189.1|//7.00E-57//white-brown-complex ABC transporter family [Populus trichocarpa] >gi|222847447|gb|EEE84994.1| white-brown-complex ABC transporter family [Populus trichocarpa]	Unigene10443_All//8.00E-35//AT1G17840| WBC11 (WHITE-BROWN COMPLEX HOMOLOG PROTEIN 11); ATPase, coupled to transmembrane movement of substances / fatty acid transporter	Unigene10443_All//0.00E+00//gi|48880748|gb|CO131770.1|CO131770		ko03040|Spliceosome//ko02010|ABC transporters	GO:0015604//GO:0017111//GO:0032559//GO:0044464	nr +
Unigene104438_All	620	0.1688	0.0817	0.0859	0.1607	0.0555	0.0728	1.9776	0.4719	0.3213	-1.0469	0.68585		-0.9746	0.72248		-1.5338	0.589		-1.1424	0.67906		-2.0672	0.00066684	Down	-2.6218	4.0164e-05	Down	Unigene104438_All//gi|297818614|ref|XP_002877190.1|//4.00E-15//ATEXO70E1 [Arabidopsis lyrata subsp. lyrata] >gi|297323028|gb|EFH53449.1| ATEXO70E1 [Arabidopsis lyrata subsp. lyrata]	Unigene104438_All//3.00E-15//AT3G29400| ATEXO70E1 (exocyst subunit EXO70 family protein E1); protein binding	Unigene104438_All//0.00E+00//TC146233				nr -
Unigene10445_All	619	1.3524	0.7367	1.8926	8.7718	3.7272	2.1889	2.1857	0.8778	0.5149	-0.8764	0.24693		0.4848	0.44667		-1.2348	2.9968e-07	Down	-2.0027	1.5798e-12	Down	-1.3161	0.012503		-2.0857	0.00018492	Down			Unigene10445_All//3.00E-12//ES830995
Unigene10446_All	595	0.7914	0.1703	0.8055	0.5023	3.6461	0.759	1.0659	0.2107	0.2678	-2.2163	0.077669		0.0255	0.99991		2.8597	5.9671e-08	Up	0.5956	0.64001		-2.3388	0.012734		-1.9928	0.020384		Unigene10446_All//gi|15232013|ref|NP_187520.1|//2.00E-35//transducin family protein / WD-40 repeat family protein [Arabidopsis thaliana]	Unigene10446_All//1.00E-36//AT3G09080| transducin family protein / WD-40 repeat family protein	Unigene10446_All//0.00E+00//ES850458				nr +
Unigene10447_All	335	0	14.8227	2.5433	0	0	0	0	0	0	13.8555	2.6287e-28	Up	11.3125	9.0346e-05	Up	null	null		null	null		null	null		null	null		Unigene10447_All//gi|226456844|gb|EEH54144.1|//1.00E-25//histone H4 [Micromonas pusilla CCMP1545]	Unigene10447_All//6.00E-27//AT5G59970| histone H4	Unigene10447_All//1.00E-16//TC167353			GO:0000785//GO:0003676//GO:0005856//GO:0008092//GO:0034728//GO:0043231	nr -
Unigene104472_All	587	4.1001	3.4528	1.1793	3.7339	2.6985	4.2317	3.7454	2.2073	1.8324	-0.2479	0.56319		-1.7977	0.00011081	Down	-0.4685	0.29416		0.1806	0.69687		-0.7628	0.048556		-1.0314	0.0058678		Unigene104472_All//gi|7330785|gb|AAF60252.1|AF204677_1//2.00E-59//guanylate kinase [Arabidopsis thaliana]	Unigene104472_All//3.00E-52//AT3G57550| AGK2 (GUANYLATE KINASE); guanylate kinase	Unigene104472_All//0.00E+00//EX168696		ko00230|Purine metabolism	GO:0009117//GO:0016776//GO:0032559//GO:0044424	nr +
Unigene10448_All	479	0	0	0	0	0.2876	0.1886	0.2648	1.8324	6.1546	null	null		null	null		8.1679	0.32042		7.5592	0.48179		2.7908	0.00069663	Up	4.5387	3.3787e-17	Up	Unigene10448_All//gi|6017938|gb|AAF01694.1|AF181456_1//7.00E-13//dehydrin [Hordeum vulgare subsp. vulgare]						nr +
Unigene10449_All	483	0	0	0	0	0	0	5.3397	0.6057	2.1445	null	null		null	null		null	null		null	null		-3.1401	2.2208e-11	Down	-1.3161	0.00017943	Down	Unigene10449_All//gi|55168340|gb|AAV44205.1|//3.00E-12//unknow protein [Oryza sativa Japonica Group]		Unigene10449_All//1.00E-17//TC149394				nr +
Unigene104511_All	250	0.2093	0	0	0.5978	0.8264	0.1807	3.5515	0.5015	0.4781	-7.7094	0.62123		-7.7094	0.63405		0.4672	0.8258		-1.7261	0.50237		-2.8241	0.00056509	Down	-2.893	0.00030455	Down
Unigene104515_All	277	0.1889	0.3658	1.3457	1.4387	0.2486	1.6304	8.7003	15.994	27.0385	0.9534	0.72796		2.8327	0.093159		-2.5329	0.058008		0.1805	0.88377		0.8784	0.00062896		1.6359	3.4922e-15	Up			Unigene104515_All//2.00E-60//FL576534
Unigene104518_All	306	0	0.3312	0	0	0	2.6567	0.829	0	0.1302	8.3716	0.39108		null	null		null	null		11.3754	6.9554e-05	Up	-9.6952	0.040633		-2.6706	0.11528
Unigene10452_All	452	0	5.7171	3.2987	0	0	0	0	0	0	12.4811	1.0558e-14	Up	11.6877	3.2237e-08	Up	null	null		null	null		null	null		null	null		Unigene10452_All//gi|297798734|ref|XP_002867251.1|//1.00E-43//ATP synthase family [Arabidopsis lyrata subsp. lyrata] >gi|297313087|gb|EFH43510.1| ATP synthase family [Arabidopsis lyrata subsp. lyrata]	Unigene10452_All//1.00E-37//AT4G32260| ATP synthase family			ko00190|Oxidative phosphorylation//ko00195|Photosynthesis	GO:0006754//GO:0006818//GO:0006952//GO:0009526//GO:0009534//GO:0015077//GO:0031224//GO:0033177	nr -
Unigene10453_All	493	0	2.775	1.2961	0	0.1397	0.0916	0	0	0	11.4383	7.8014e-08	Up	10.34	0.0011609		7.1262	0.61631		6.5173	0.70382		null	null		null	null		Unigene10453_All//sp|Q5RC60|TIMP1_PONAB//2.00E-68//Metalloproteinase inhibitor 1 OS=Pongo abelii GN=TIMP1 PE=2 SV=1						swissprot -
Unigene104556_All	614	0	0	0	0.1623	0.2243	1.6918	0.482	0.1361	0	null	null		null	null		0.4668	0.87815		3.3818	0.00020423	Up	-1.8244	0.2112		-8.9129	0.01589		Unigene104556_All//gi|296081092|emb|CBI18286.3|//3.00E-06//unnamed protein product [Vitis vinifera]		Unigene104556_All//4.00E-27//DT462277				nr -
Unigene104566_All	364	0	0	0	0	0	0	6.2723	0	0	null	null		null	null		null	null		null	null		-12.6148	3.7802e-16	Down	-12.6148	8.1503e-17	Down	Unigene104566_All//gi|53828151|gb|AAU94355.1|//2.00E-31//iron reductase [Pisum sativum]	Unigene104566_All//4.00E-16//AT1G23020| FRO3; ferric-chelate reductase	Unigene104566_All//1.00E-22//CO089158			GO:0006826//GO:0008152//GO:0016723//GO:0030554//GO:0031224//GO:0046914//GO:0050664//GO:0051707//GO:0055066	nr -
Unigene104568_All	251	0	0	0.2122	0.3969	0	0	4.5481	0	0.6349	null	null		7.7293	0.64188		-8.6326	0.31755		-8.6326	0.40575		-12.151	3.8868e-08	Down	-2.8407	3.5983e-05	Down	Unigene104568_All//gi|224120220|ref|XP_002330994.1|//3.00E-22//cytochrome P450 [Populus trichocarpa] >gi|222872924|gb|EEF10055.1| cytochrome P450 [Populus trichocarpa]	Unigene104568_All//2.00E-22//AT2G42250| CYP712A1; electron carrier/ heme binding / iron ion binding / monooxygenase/ oxygen binding	Unigene104568_All//6.00E-70//ES837654			GO:0005506//GO:0008152//GO:0016709//GO:0044464	nr +
Unigene104571_All	391	1.3381	0	0.1362	0	0.1761	1.8481	0.1081	0.1069	0	-10.386	0.002929		-3.2964	0.024005		7.4603	0.6163		10.8518	0.00023104	Up	-0.0161	1.0069		-6.7562	0.61832		Unigene104571_All//gi|9294523|dbj|BAB02785.1|//3.00E-43//protein transport protein Sec23 [Arabidopsis thaliana]	Unigene104571_All//1.00E-44//AT3G23660| transport protein, putative	Unigene104571_All//1.00E-96//TC133366			GO:0012507//GO:0015031//GO:0046914//GO:0048193	nr +
Unigene104579_All	286	3.4759	9.9213	2.979	2.961	3.8529	4.5795	0.2957	0.5846	0.8358	1.5131	0.0001252	Up	-0.2226	0.73375		0.3799	0.60068		0.6291	0.31457		0.9833	0.63477		1.499	0.33945		Unigene104579_All//gi|196196276|gb|ACG76109.1|//2.00E-18//pathogenesis-induced protein [Arachis hypogaea]	Unigene104579_All//2.00E-16//AT1G01360| unknown protein	Unigene104579_All//6.00E-61//CO084264				nr +
Unigene10459_All	349	0	0	0	0.2855	0	0	1.9383	0.1198	1.7123	null	null		null	null		-8.1573	0.31755		-8.1573	0.40574		-4.0161	0.00053639	Down	-0.1789	0.79421		Unigene10459_All//gi|255586731|ref|XP_002533988.1|//1.00E-36//ice binding protein, putative [Ricinus communis] >gi|223526023|gb|EEF28395.1| ice binding protein, putative [Ricinus communis]	Unigene10459_All//3.00E-22//AT5G57770| FUNCTIONS IN: molecular_function unknown; INVOLVED IN: biological_process unknown; LOCATED IN: cellular_component unknown; EXPRESSED IN: root; CONTAINS InterPro DOMAIN/s: Pleckstrin-like, plant (InterPro:IPR013666), Protein of unknown function DUF828, plant (InterPro:IPR008546); Has 104 Blast hits to 104 proteins in 9 species: Archae - 0; Bacteria - 2; Metaz…					nr +
Unigene104598_All	250	0.8371	0	0.213	6.3762	2.7548	1.6259	0.1691	0	0	-9.7093	0.12272		-1.9745	0.38175		-1.2107	0.015157		-1.9715	0.00048822	Down	-7.4017	0.66428		-7.4017	0.61829				Unigene104598_All//4.00E-71//DT048741
Unigene104611_All	258	0	0	0	3.6685	1.8686	0.1751	0.3278	0	0	null	null		null	null		-0.9732	0.15978		-4.3889	5.965e-05	Down	-8.3567	0.40778		-8.3567	0.36171		Unigene104611_All//gi|224123342|ref|XP_002319055.1|//5.00E-13//predicted protein [Populus trichocarpa] >gi|222857431|gb|EEE94978.1| predicted protein [Populus trichocarpa]		Unigene104611_All//2.00E-76//gi|3326234|gb|AI055120.1|AI055120				nr -
Unigene104622_All	224	0	0	0.7132	0.2224	0.4612	0.8065	5.0963	0.9329	0.5336	null	null		9.4782	0.24001		1.0522	0.80993		1.8585	0.45925		-2.4497	0.00024643	Down	-3.2556	8.9373e-06	Down			Unigene104622_All//2.00E-66//TC154279
Unigene10463_All	378	0.1384	0.134	0.2817	0.7907	0.1822	0.4779	2.0133	6.6342	11.3825	-0.0466	0.98754		1.0253	0.70486		-2.1176	0.16564		-0.7264	0.63931		1.7204	8.2641e-06	Up	2.4992	4.7181e-15	Up			Unigene10463_All//1.00E-10//BQ413454
Unigene104641_All	722	0	0	0	3.3117	5.1987	2.1268	1.5226	0.1737	0.1104	null	null		null	null		0.6506	0.038318		-0.6389	0.13073		-3.1319	3.4659e-05	Down	-3.7857	3.2702e-06	Down	Unigene104641_All//gi|224090738|ref|XP_002309069.1|//1.00E-100//laccase 110c [Populus trichocarpa] >gi|222855045|gb|EEE92592.1| laccase 110c [Populus trichocarpa]	Unigene104641_All//1.00E-83//AT5G60020| LAC17 (laccase 17); laccase	Unigene104641_All//0.00E+00//gi|109859138|gb|DW488117.1|DW488117		ko00910|Nitrogen metabolism//ko00053|Ascorbate and aldarate metabolism	GO:0005576//GO:0009808//GO:0016682//GO:0046914	nr +
Unigene104648_All	304	1.2048	2.5001	0	0.8193	1.246	6.3882	0.2782	0.5499	0	1.0532	0.20456		-10.2346	0.027872		0.6048	0.65933		2.9629	4.8453e-07	Up	0.983	0.63476		-8.12	0.3617				Unigene104648_All//1.00E-12//AW187099
Unigene10467_All	469	0.4462	0.6482	0.5677	1.487	0.5874	0.6741	0.9916	4.545	1.1043	0.5387	0.6719		0.3474	0.79714		-1.34	0.10918		-1.1414	0.2011		2.1965	1.163e-06	Up	0.1553	0.8601				Unigene10467_All//0.00E+00//TC137224
Unigene10468_All	316	0	0	0	0	0	0	1.8732	3.0421	0	null	null		null	null		null	null		null	null		0.6996	0.27799		-10.8713	0.00014166	Down							ESTscan -
Unigene104697_All	359	5.9754	14.2552	7.7131	10.2681	14.9635	17.9899	10.3639	22.1203	24.9685	1.2544	5.1918e-06	Up	0.3683	0.37549		0.5433	0.033129		0.809	0.000414		1.0938	7.6734e-09	Up	1.2685	1.3512e-12	Up	Unigene104697_All//gi|224058435|ref|XP_002299508.1|//6.00E-06//predicted protein [Populus trichocarpa] >gi|222846766|gb|EEE84313.1| predicted protein [Populus trichocarpa]	Unigene104697_All//4.00E-05//AT1G01490| heavy-metal-associated domain-containing protein	Unigene104697_All//9.00E-73//TC164512				nr -
Unigene10470_All	339	0.1543	2.6904	0.4712	0.2939	0.4063	0.7994	0.3742	0.2466	1.0577	4.124	0.00023366	Up	1.6106	0.51185		0.4672	0.87812		1.4436	0.40976		-0.6016	0.76782		1.499	0.20369				Unigene10470_All//4.00E-07//TC161099
Unigene104704_All	215	1.2168	0.707	5.6965	0.9268	2.0821	6.722	0.1967	1.5552	0	-0.7833	0.62024		2.227	0.002233		1.1677	0.34748		2.8586	3.3536e-05	Up	2.983	0.057419		-7.6199	0.61821				Unigene104704_All//3.00E-19//TC133986				ESTscan -
Unigene104720_All	312	12.4094	5.5217	17.75	3.0336	2.5385	3.0398	0	0	0	-1.1682	0.00023424	Down	0.5164	0.052385		-0.2571	0.72722		0.0029	0.99806		null	null		null	null		Unigene104720_All//gi|19184|emb|CAA43590.1|//6.00E-07//Type I (26 kD) CP29 polypeptide [Solanum lycopersicum]	Unigene104720_All//2.00E-05//AT4G10340| LHCB5 (LIGHT HARVESTING COMPLEX OF PHOTOSYSTEM II 5); chlorophyll binding	Unigene104720_All//3.00E-20//EX167600		ko00196|Photosynthesis - antenna proteins	GO:0044237//GO:0044464	nr -
Unigene10473_All	568	0	5.174	1.2187	0	0	0	0	0	0	12.3371	1.011e-16	Up	10.2511	0.00061693	Up	null	null		null	null		null	null		null	null								ESTscan +
Unigene104760_All	230	0	0	0.2315	0.4332	0.5989	0.7855	6.9854	52.3355	10.7391	null	null		7.8549	0.64175		0.4673	0.87811		0.8586	0.69652		2.9054	5.4462e-47	Up	0.6205	0.076311		Unigene104760_All//gi|23978432|dbj|BAC21263.1|//3.00E-12//glutathione S-transferase [Cucurbita maxima]		Unigene104760_All//1.00E-30//gi|164314276|gb|ES842964.1|ES842964		ko00480|Glutathione metabolism	GO:0016740//GO:0016846	nr +
Unigene104761_All	315	0	0	0.169	4.9024	4.0448	1.8639	2.6845	0.2654	0.8853	null	null		7.4009	0.64174		-0.2774	0.59753		-1.3952	0.010559		-3.3384	0.00025153	Down	-1.6004	0.020178				Unigene104761_All//1.00E-46//gi|109836538|gb|DW235099.1|DW235099
Unigene104787_All	352	1.3377	5.1821	1.8153	0.7076	1.4674	1.7963	1.081	1.0686	1.1318	1.9538	0.00027662	Up	0.4405	0.62342		1.0523	0.34892		1.344	0.17362		-0.0166	1.0234		0.0663	0.96646		Unigene104787_All//gi|6664314|gb|AAF22896.1|AC006932_13//8.00E-12//T27G7.21 [Arabidopsis thaliana]	Unigene104787_All//1.00E-15//AT1G08530| unknown protein	Unigene104787_All//2.00E-120//TC152997			GO:0043231	nr -
Unigene10480_All	291	7.0121	32.2125	25.2526	75.6628	61.0605	57.5794	353.352	284.383	143.885	2.1997	5.4811e-22	Up	1.8485	1.6411e-13	Up	-0.3093	0.0062362		-0.394	0.00062641		-0.3133	4.9118e-12		-1.2962	2.9162e-141	Down			Unigene10480_All//2.00E-138//gi|109838778|gb|DW237339.1|DW237339
Unigene104806_All	495	0.4228	0.8189	2.797	1.5095	0.4174	0.9124	0.1708	0.1689	0.161	0.9537	0.41405		2.7258	0.00017778	Up	-1.8546	0.025286		-0.7263	0.39022		-0.0161	1.0161		-0.0852	0.97397				Unigene104806_All//1.00E-149//gi|21096576|gb|BQ408889.1|BQ408889
Unigene10482_All	412	0	0	0	0	0	0	6.5678	3.0434	0	null	null		null	null		null	null		null	null		-1.1097	0.0013143		-12.6812	6.5517e-20	Down	Unigene10482_All//gi|145408590|ref|YP_001152214.1|//8.00E-06//ORF124 [Pinus koraiensis] >gi|145048839|gb|ABP35456.1| ORF124 [Pinus koraiensis]		Unigene10482_All//4.00E-23//gi|11207717|gb|BF276647.1|BF276647				nr -
Unigene104832_All	298	0.5267	0.3401	1.2508	7.3551	15.2532	4.5466	2.8376	0	0	-0.631	0.7285		1.2478	0.36587		1.0523	0.00012149	Up	-0.694	0.1175		-11.4705	4.3918e-06	Down	-11.4705	2.2134e-06	Down			Unigene104832_All//3.00E-134//ES851582
Unigene104833_All	309	34.2033	13.4463	37.5679	23.698	22.1768	10.085	0.9578	0.6763	0.5157	-1.3469	6.7753e-13	Down	0.1354	0.47924		-0.0957	0.71373		-1.2326	1.4879e-08	Down	-0.5021	0.67828		-0.8932	0.47149				Unigene104833_All//2.00E-110//TC174668
Unigene10484_All	373	0.5611	2.4452	3.9973	8.1466	8.6781	6.5384	0.4534	0.2241	0	2.1236	0.01036		2.8327	6.1716e-05	Up	0.0912	0.82301		-0.3173	0.41733		-1.0166	0.61555		-8.8246	0.109				Unigene10484_All//2.00E-67//gi|13247536|gb|BF270981.2|BF270981
Unigene104856_All	269	0.389	0	0	0.1852	0.384	0.1679	2.672	0.1554	0.5924	-8.6036	0.37736		-8.6036	0.39935		1.052	0.80988		-0.1415	0.95691		-4.1039	0.00029152	Down	-2.1733	0.0077591		Unigene104856_All//gi|19570247|dbj|BAB86283.1|//6.00E-28//kinesin-like protein NACK1 [Nicotiana tabacum]	Unigene104856_All//7.00E-27//AT1G18370| HIK (HINKEL); ATP binding / microtubule motor				GO:0000226//GO:0003774//GO:0007349//GO:0009536//GO:0015630//GO:0032559//GO:0033206//GO:0046914//GO:0048229	nr +
Unigene104865_All	266	0.3934	0	1.2011	0	1.424	2.8864	0.9537	0	0.5991	-8.6199	0.37735		1.6103	0.30512		10.4757	0.01959		11.4951	0.00012688	Up	-9.8974	0.040632		-0.6707	0.60611		Unigene104865_All//gi|186501175|ref|NP_179383.2|//8.00E-35//binding / inositol or phosphatidylinositol kinase/ phosphotransferase, alcohol group as acceptor [Arabidopsis thaliana]	Unigene104865_All//3.00E-36//AT2G17930| binding / inositol or phosphatidylinositol kinase/ phosphotransferase, alcohol group as acceptor	Unigene104865_All//2.00E-141//TC142236			GO:0016772	nr +
Unigene10487_All	286	0	0	0	0	0	0	217.462	79.2073	21.173	null	null		null	null		null	null		null	null		-1.4571	1.6456e-99	Down	-3.3605	6.5701e-287	Down
Unigene10489_All	362	0.8672	0.14	3.9717	1.2385	0	0	0	0	0	-2.6309	0.13067		2.1953	0.00087281	Up	-10.2744	0.0020019		-10.2744	0.0057934		null	null		null	null		Unigene10489_All//COG4784//1.00E-25//Putative Zn-dependent protease						cog -
Unigene104908_All	274	2.2914	2.0342	1.7491	4.7269	5.6554	2.4724	5.2464	6.2541	1.1632	-0.1718	0.82879		-0.3896	0.64605		0.2587	0.66383		-0.935	0.12185		0.2535	0.62167		-2.1732	6.8856e-05	Down			Unigene104908_All//7.00E-73//ES847924
Unigene104912_All	236	190.882	117.442	217.964	24.2739	22.1787	8.803	0.1792	0.3542	0	-0.7007	2.7622e-18		0.1914	0.016797		-0.1302	0.63363		-1.4633	1.0771e-08	Down	0.983	0.73319		-7.4854	0.61809				Unigene104912_All//6.00E-107//gi|84145839|gb|DN760081.1|DN760081
Unigene104917_All	446	1.0558	0.6817	1.1939	1.8987	0.7721	2.2278	5.9723	1.7805	1.7865	-0.6311	0.55372		0.1773	0.84547		-1.2982	0.080064		0.2306	0.74092		-1.746	2.9934e-06	Down	-1.7412	1.7786e-06	Down	Unigene104917_All//gi|225440831|ref|XP_002282071.1|//2.00E-15//PREDICTED: similar to ubiquitin fusion protein [Vitis vinifera] >gi|71040673|gb|AAZ20285.1| ubiquitin fusion protein [Arachis hypogaea] >gi|192910738|gb|ACF06477.1| ubiquitin fusion protein [Elaeis guineensis] >gi|284433784|gb|ADB85098.1| ubiquitin C variant [Jatropha curcas]	Unigene104917_All//2.00E-16//AT3G52590| UBQ1 (UBIQUITIN EXTENSION PROTEIN 1); protein binding / structural constituent of ribosome	Unigene104917_All//2.00E-154//gi|84164961|gb|DR453609.1|DR453609		ko03010|Ribosome	GO:0003006//GO:0005198//GO:0005488//GO:0010467//GO:0015934//GO:0031981//GO:0032446	nr +
Unigene10493_All	272	0	0	0	0	0	0	2.798	0.922	0	null	null		null	null		null	null		null	null		-1.6016	0.037023		-11.4502	8.8893e-06	Down	Unigene10493_All//gi|159489791|ref|XP_001702878.1|//3.00E-18//ribosomal protein L38, component of cytosolic 80S ribosome and 60S large subunit [Chlamydomonas reinhardtii] >gi|27497793|gb|AAO13217.1| 60S ribosomal protein L38 [Chlamydomonas reinhardtii] >gi|158271006|gb|EDO96835.1| ribosomal protein L38 [Chlamydomonas reinhardtii]	Unigene10493_All//4.00E-19//AT3G59540| 60S ribosomal protein L38 (RPL38B)			ko03010|Ribosome	GO:0005198//GO:0010467//GO:0015934//GO:0022613	nr +
Unigene104932_All	487	0.4297	3.9537	0.8747	0.2046	0.1414	2.9676	1.4759	3.1754	1.3089	3.2018	3.4184e-07	Up	1.0255	0.39673		-0.533	0.81965		3.8584	1.5065e-06	Up	1.1053	0.021539		-0.1732	0.79417		Unigene104932_All//gi|109631652|gb|ABG36000.1|//3.00E-31//glutathione peroxidase [Helianthus annuus] >gi|109631654|gb|ABG36001.1| glutathione peroxidase [Helianthus annuus]	Unigene104932_All//1.00E-26//AT1G48130| ATPER1; antioxidant/ thioredoxin peroxidase	Unigene104932_All//1.00E-168//gi|109871672|gb|DW500648.1|DW500648		ko00940|Phenylpropanoid biosynthesis//ko00360|Phenylalanine metabolism	GO:0008152//GO:0016209//GO:0016705//GO:0019725//GO:0043231	nr +
Unigene10494_All	343	0	4.8749	0.7762	0	0	0	0	0	0	12.2512	1.5391e-09	Up	9.6003	0.080396		null	null		null	null		null	null		null	null		Unigene10494_All//sp|P40092|SPI1_YEAST//7.00E-09//Uncharacterized cell wall protein SPI1 OS=Saccharomyces cerevisiae GN=SPI1 PE=2 SV=1						swissprot -
Unigene10496_All	398	0	0	0	0.6258	0.9517	0	2.762	1.4702	0.6006	null	null		null	null		0.6048	0.65932		-9.2896	0.073588		-0.9097	0.12371		-2.2012	0.00056566	Down	Unigene10496_All//gi|224129122|ref|XP_002320506.1|//3.00E-19//f-box family protein [Populus trichocarpa] >gi|222861279|gb|EEE98821.1| f-box family protein [Populus trichocarpa]	Unigene10496_All//3.00E-11//AT3G07870| F-box family protein					nr -
Unigene104966_All	793	1.0557	1344.5	787.603	0.3769	0.0868	3.8158	2.026	2.2664	1.5071	10.3147	0	Up	9.5431	0	Up	-2.1184	0.16563		3.3397	6.197e-12	Up	0.1618	0.71832		-0.4269	0.35942		Unigene104966_All//gi|145408594|ref|YP_001152218.1|//3.00E-15//ORF82c [Pinus koraiensis] >gi|145048843|gb|ABP35459.1| ORF82c [Pinus koraiensis]		Unigene104966_All//1.00E-92//TC171825			GO:0009536	nr +
Unigene10498_All	332	0	3.3576	3.3682	0	0	0	0	0	0.12	11.7132	1.9994e-06	Up	11.7178	3.4357e-06	Up	null	null		null	null		null	null		6.9069	0.64846
Unigene104980_All	310	11.6456	9.807	15.4597	20.5684	19.5504	20.105	44.326	25.0774	18.3772	-0.2479	0.45883		0.4087	0.16241		-0.0732	0.81127		-0.0329	0.91428		-0.8218	1.8608e-09		-1.2702	4.7369e-19	Down	Unigene104980_All//gi|225464952|ref|XP_002274218.1|//2.00E-09//PREDICTED: similar to ribosomal protein L10a [Vitis vinifera]	Unigene104980_All//5.00E-09//AT2G27530| PGY1 (PIGGYBACK1); RNA binding / structural constituent of ribosome	Unigene104980_All//7.00E-138//gi|13245690|gb|BE055045.2|BE055045		ko03010|Ribosome		nr +
Unigene104982_All	254	0.824	0.9974	3.1447	0.3922	1.7624	2.1337	3.4956	0.4937	1.7253	0.2755	0.84367		1.9322	0.034197		2.1679	0.10646		2.4437	0.044144		-2.8238	0.00056507	Down	-1.0187	0.10904		Unigene104982_All//gi|26451087|dbj|BAC42648.1|//4.00E-15//GPI-anchored protein [Arabidopsis thaliana] >gi|28416735|gb|AAO42898.1| At5g63500 [Arabidopsis thaliana]	Unigene104982_All//6.00E-17//AT3G48660| unknown protein	Unigene104982_All//1.00E-21//gi|31073375|gb|CA993654.1|CA993654			GO:0031224	nr -
Unigene104988_All	443	0.2362	0.2288	0.2404	0	0.8551	2.2429	0.4772	0.9435	0.3597	-0.0459	0.9911		0.0254	1.0021		9.7399	0.019589		11.1311	6.1478e-06	Up	0.9834	0.37309		-0.4078	0.75604		Unigene104988_All//gi|149391295|gb|ABR25665.1|//2.00E-54//cbs domain containing protein, expressed [Oryza sativa Indica Group]	Unigene104988_All//3.00E-55//AT2G14520| CBS domain-containing protein	Unigene104988_All//2.00E-56//TC172662			GO:0031410	nr +
Unigene104998_All	252	5.3982	0.6032	0.8452	12.4536	9.5654	8.2441	43.2869	22.5564	13.1215	-3.1618	2.8542e-05	Down	-2.6751	0.0002599	Down	-0.3807	0.30315		-0.5951	0.096617		-0.9404	1.9684e-09		-1.722	1.4316e-23	Down	Unigene104998_All//gi|195618310|gb|ACG30985.1|//6.00E-06//60S acidic ribosomal protein P1 [Zea mays] >gi|195625300|gb|ACG34480.1| 60S acidic ribosomal protein P1 [Zea mays]		Unigene104998_All//3.00E-133//gi|21089661|gb|BQ401986.1|BQ401986		ko03010|Ribosome		nr -
Unigene1050_All	2881	5.43	0.9673	2.6246	88.1302	71.6794	64.8685	31.6111	6.3397	9.0435	-2.4889	2.5385e-42	Down	-1.0489	2.8231e-12	Down	-0.2981	1.7068e-25		-0.4421	3.3876e-47		-2.3179	8.4073e-274	Down	-1.8055	1.0498e-203	Down	Unigene1050_All//gi|224130916|ref|XP_002320956.1|//0.00E+00//anion exchanger family protein [Populus trichocarpa] >gi|222861729|gb|EEE99271.1| anion exchanger family protein [Populus trichocarpa]	Unigene1050_All//0.00E+00//AT2G47160| BOR1 (REQUIRES HIGH BORON 1); anion exchanger/ boron transporter	Unigene1050_All//0.00E+00//CO074020			GO:0006811//GO:0010035//GO:0015301//GO:0015562//GO:0031224//GO:0043231//GO:0043673//GO:0044459	nr -
Unigene10500_All	428	0	0	0	0	0	0	1.7781	1.8554	0	null	null		null	null		null	null		null	null		0.0614	0.95022		-10.7961	8.8889e-06	Down	Unigene10500_All//gi|300267444|gb|EFJ51627.1|//2.00E-23//component of cytosolic 80S ribosome and 40S small subunit [Volvox carteri f. nagariensis]	Unigene10500_All//1.00E-21//AT3G04770| RPSAb (40S ribosomal protein SA B); structural constituent of ribosome			ko03010|Ribosome	GO:0005737//GO:0030529	nr +
Unigene105022_All	596	34.4124	12.3273	36.5424	4.0119	3.1778	1.2124	1.206	1.683	0.2674	-1.4811	5.8489e-28	Down	0.0866	0.54284		-0.3363	0.44074		-1.7264	6.612e-05	Down	0.4808	0.44641		-2.1732	0.0077588		Unigene105022_All//gi|87241054|gb|ABD32912.1|//5.00E-38//Ferric reductase-like transmembrane component [Medicago truncatula]	Unigene105022_All//6.00E-30//AT5G49730| ATFRO6 (FERRIC REDUCTION OXIDASE 6); ferric-chelate reductase/ oxidoreductase	Unigene105022_All//0.00E+00//DW504224			GO:0005488//GO:0009314//GO:0016020//GO:0016723	nr -
Unigene10503_All	1095	0	0	0	0.0455	0.1887	0.2475	0.6564	1.4123	4.0384	null	null		null	null		2.0522	0.3953		2.4435	0.22217		1.1054	0.021538		2.6211	2.9753e-16	Up	Unigene10503_All//gi|14330716|emb|CAC40826.1|//1.00E-42//HcrVf2 protein [Malus floribunda]	Unigene10503_All//1.00E-29//AT2G34930| disease resistance family protein					nr +
Unigene10507_All	381	0.412	0	0	0	0	0	2.8853	1.097	0.2091	-8.6865	0.21694		-8.6865	0.24646		null	null		null	null		-1.3952	0.020389		-3.7865	3.27e-06	Down
Unigene10509_All	482	0.8684	1.682	0.7733	3.9273	3.715	1.0307	0.7017	0.3469	0.4959	0.9537	0.22649		-0.1673	0.87927		-0.0802	0.85798		-1.9299	0.00014516	Down	-1.0163	0.4		-0.5008	0.64957				Unigene10509_All//3.00E-135//DW519316
Unigene1051_All	2081	12.2191	14.877	14.2529	25.2781	26.5752	38.0666	51.5449	46.4754	20.0055	0.2839	0.0040164		0.2221	0.040931		0.0722	0.41312		0.5906	4.641e-25		-0.1494	0.0012056		-1.3654	1.3406e-159	Down	Unigene1051_All//gi|28380080|sp|Q9C8F1.1|IF5Y_ARATH//1.00E-170//RecName: Full=Probable eukaryotic translation initiation factor 5-1; Short=eIF-5 1	Unigene1051_All//4.00E-147//AT1G36730| eukaryotic translation initiation factor 5, putative / eIF-5, putative	Unigene1051_All//0.00E+00//TC149110			GO:0006412//GO:0008135	nr -
Unigene105108_All	298	0.1756	0	0	4.179	2.1955	0.7578	0	0	0.2674	-7.4561	0.62092		-7.4561	0.63372		-0.9286	0.11081		-2.4633	0.00041502	Down	null	null		8.0629	0.40618		Unigene105108_All//gi|22329014|ref|NP_194662.2|//5.00E-24//DER1 (DERLIN-1) [Arabidopsis thaliana] >gi|75161705|sp|Q8VZU9.1|DERL1_ARATH RecName: Full=Derlin-1; AltName: Full=AtDerlin1-1	Unigene105108_All//2.00E-25//AT4G29330| DER1 (DERLIN-1)	Unigene105108_All//9.00E-08//DR459372			GO:0019538//GO:0043231//GO:0044425	nr +
Unigene10511_All	398	0	4.7105	2.8097	0	0	0	0	0	0	12.2017	1.1064e-10	Up	11.4562	3.4354e-06	Up	null	null		null	null		null	null		null	null
Unigene105113_All	296	2.6514	0.1712	1.6191	1.8512	1.6287	1.5258	0.1428	0.5648	0.8075	-3.953	0.00085442	Down	-0.7116	0.38857		-0.1847	0.82534		-0.2789	0.7572		1.9837	0.37987		2.4995	0.15912		Unigene105113_All//gi|18396347|ref|NP_564285.1|//2.00E-16//NPGR1 (NO POLLEN GERMINATION RELATED 1); calmodulin binding [Arabidopsis thaliana] >gi|9802536|gb|AAF99738.1|AC004557_17 F17L21.25 [Arabidopsis thaliana] >gi|16226498|gb|AAL16183.1|AF428415_1 At1g27460/F17L21_26 [Arabidopsis thaliana] >gi|33589668|gb|AAQ22600.1| At1g27460/F17L21_26 [Arabidopsis thaliana]	Unigene105113_All//7.00E-18//AT1G27460| NPGR1 (NO POLLEN GERMINATION RELATED 1); calmodulin binding	Unigene105113_All//1.00E-108//TC142974			GO:0005515//GO:0016020	nr +
Unigene10512_All	430	0	0.4713	1.2384	0	1.2012	1.9956	0.9833	0.2916	2.7794	8.8805	0.13742		10.2743	0.0040483		10.2303	0.0032154		10.9626	3.7946e-05	Up	-1.7536	0.12373		1.4991	0.0075632		Unigene10512_All//gi|225432404|ref|XP_002276907.1|//2.00E-11//PREDICTED: hypothetical protein [Vitis vinifera]		Unigene10512_All//2.00E-49//gi|109864441|gb|DW493417.1|DW493417				nr +
Unigene105124_All	495	0.4228	0	1.1833	2.9184	2.087	2.0985	1.025	0	0.3219	-8.7238	0.1227		1.4848	0.15337		-0.4837	0.39152		-0.4758	0.41524		-10.0014	0.00089103	Down	-1.6709	0.077836		Unigene105124_All//gi|118481019|gb|ABK92463.1|//4.00E-15//unknown [Populus trichocarpa]	Unigene105124_All//4.00E-08//AT2G40480| unknown protein	Unigene105124_All//4.00E-14//TC165937				nr +
Unigene105128_All	317	0	0.1598	0	0.1571	0	1.4247	0.2668	0.7911	2.7648	7.3201	0.62233		null	null		-7.2955	0.56438		3.1809	0.037896		1.5681	0.3268		3.3733	0.00013225	Up	Unigene105128_All//gi|297819958|ref|XP_002877862.1|//4.00E-21//U-box domain-containing protein [Arabidopsis lyrata subsp. lyrata] >gi|297323700|gb|EFH54121.1| U-box domain-containing protein [Arabidopsis lyrata subsp. lyrata]	Unigene105128_All//2.00E-22//AT3G52450| PUB22 (PLANT U-BOX 22); ubiquitin-protein ligase			ko04141|Protein processing in endoplasmic reticulum//ko04120|Ubiquitin mediated proteolysis	GO:0002252//GO:0006950//GO:0016567//GO:0019787//GO:0043234//GO:0044444	nr +
Unigene10514_All	478	0	0	0	2.2927	1.801	0.3779	1.0614	0.2623	0.6668	null	null		null	null		-0.3482	0.59655		-2.601	0.00071364	Down	-2.0167	0.052106		-0.6706	0.44851		Unigene10514_All//gi|297605832|ref|NP_001057661.2|//7.00E-16//Os06g0484800 [Oryza sativa Japonica Group] >gi|255677053|dbj|BAF19575.2| Os06g0484800 [Oryza sativa Japonica Group]						nr -
Unigene10515_All	342	0	0	0	0	0	0	3.8324	3.7885	0	null	null		null	null		null	null		null	null		-0.0166	1.0114		-11.904	9.8552e-10	Down			Unigene10515_All//4.00E-10//TC139311
Unigene105161_All	568	0	1.7841	0	0.1754	0.3638	1.6698	0	0.6623	1.0521	10.801	7.2638e-06	Up	null	null		1.0525	0.61293		3.251	0.00058398	Up	9.3713	0.0068669		10.0391	0.00017559	Up	Unigene105161_All//gi|224082932|ref|XP_002306897.1|//1.00E-48//AP2/ERF domain-containing transcription factor [Populus trichocarpa] >gi|222856346|gb|EEE93893.1| AP2/ERF domain-containing transcription factor [Populus trichocarpa]	Unigene105161_All//1.00E-42//AT1G75490| DNA binding / transcription factor	Unigene105161_All//3.00E-52//TC178922	AP2-EREBP		GO:0001071//GO:0003676//GO:0006351//GO:0009743//GO:0010468//GO:0043231	nr +
Unigene10517_All	250	0.2093	0	0	0	0.2755	0	13.5297	26.7493	224.849	-7.7094	0.62092		-7.7094	0.63369		8.1059	0.61607		null	null		0.9834	1.7218e-06		4.0548	1.645e-296	Up	Unigene10517_All//gi|255575021|ref|XP_002528416.1|//9.00E-13//amino acid transporter, putative [Ricinus communis] >gi|223532152|gb|EEF33958.1| amino acid transporter, putative [Ricinus communis]					GO:0031224	nr +
Unigene105188_All	486	0.6459	1.2511	0	1.3325	1.7005	2.4161	0.087	1.118	1.5575	0.9538	0.31438		-9.3352	0.049335		0.3518	0.68676		0.8585	0.19473		3.6838	0.0036904		4.1621	0.00013433	Up	Unigene105188_All//gi|79474118|ref|NP_193133.3|//3.00E-54//zinc ion binding [Arabidopsis thaliana]	Unigene105188_All//1.00E-55//AT4G13970| zinc ion binding				GO:0046914	nr -
Unigene10519_All	394	0.2656	2.4435	0.8109	1.5172	0.5244	0.1146	2.1462	0.9547	1.2134	3.2016	0.000655	Up	1.6103	0.30511		-1.5327	0.10061		-3.7267	0.0049572		-1.1687	0.09293		-0.8227	0.20695				Unigene10519_All//0.00E+00//TC173046
Unigene105205_All	567	0	0	0.1878	0.7907	0.9717	0.3983	15.3611	0.9583	0.4918	null	null		7.5531	0.40265		0.2974	0.81796		-0.9893	0.39427		-4.0027	2.6535e-45	Down	-4.9651	1.2457e-53	Down	Unigene105205_All//gi|224120220|ref|XP_002330994.1|//7.00E-63//cytochrome P450 [Populus trichocarpa] >gi|222872924|gb|EEF10055.1| cytochrome P450 [Populus trichocarpa]	Unigene105205_All//1.00E-55//AT2G42250| CYP712A1; electron carrier/ heme binding / iron ion binding / monooxygenase/ oxygen binding	Unigene105205_All//2.00E-158//gi|48750763|gb|CO081282.1|CO081282		ko00945|Stilbenoid, diarylheptanoid and gingerol biosynthesis//ko00903|Limonene and pinene degradation	GO:0005506//GO:0008152//GO:0016709//GO:0044464	nr +
Unigene105206_All	340	0.9233	0	0.3132	3.5163	0.8102	0.797	1.7409	0.2459	0	-9.8507	0.036676		-1.5597	0.33038		-2.1177	0.00085641	Down	-2.1414	0.0018136		-2.8237	0.0071795		-10.7656	0.00014166	Down
Unigene105230_All	327	0.48	0.155	0	0.6093	1.0531	1.6574	4.9133	3.0676	0.8528	-1.6308	0.48917		-8.9069	0.24645		0.7894	0.59606		1.4437	0.19262		-0.6796	0.14685		-2.5264	2.9618e-06	Down			Unigene105230_All//2.00E-67//gi|18098905|gb|BM358159.1|BM358159
Unigene105235_All	741	0.1412	0	0.0719	0.2017	0.0465	0	0.6847	0	0	-7.1416	0.37724		-0.9737	0.72238		-2.1169	0.38757		-7.6561	0.2347		-9.4193	0.00089099	Down	-9.4193	0.00055599	Down	Unigene105235_All//gi|224140225|ref|XP_002323485.1|//5.00E-81//multidrug/pheromone exporter, MDR family, ABC transporter family [Populus trichocarpa] >gi|222868115|gb|EEF05246.1| multidrug/pheromone exporter, MDR family, ABC transporter family [Populus trichocarpa]	Unigene105235_All//8.00E-69//AT2G36910| ABCB1 (ATP BINDING CASSETTE SUBFAMILY B1); ATPase, coupled to transmembrane movement of substances / auxin efflux transmembrane transporter/ calmodulin binding			ko02010|ABC transporters	GO:0005515//GO:0009630//GO:0009639//GO:0009725//GO:0015562//GO:0022891//GO:0031224//GO:0032535//GO:0032559//GO:0042626//GO:0043231//GO:0043479//GO:0048437//GO:0051707//GO:0060918	nr -
Unigene105249_All	810	0.1292	0	0.1315	0.0615	0.3826	2.8436	0	0	0.2951	-7.0135	0.37724		0.0255	1.002		2.6372	0.16118		5.531	2.1209e-12	Up	null	null		8.2051	0.044055
Unigene105254_All	655	4.7927	9.9792	9.024	3.8026	3.3121	3.1718	0.1291	0.0638	0.1216	1.0581	7.0012e-06	Up	0.9129	0.00033516		-0.1992	0.6309		-0.2617	0.56631		-1.0169	0.72666		-0.0863	0.97391				Unigene105254_All//1.00E-131//gi|78333874|gb|DT554148.1|DT554148
Unigene10526_All	302	1.7325	7.8856	7.9346	0.9897	1.1402	0.7477	2.52	0.4152	0.6596	2.1864	4.6185e-06	Up	2.1953	7.4262e-06	Up	0.2042	0.90169		-0.4045	0.75165		-2.6015	0.0028106		-1.9338	0.011361				Unigene10526_All//3.00E-109//gi|21102508|gb|BQ414821.1|BQ414821
Unigene105280_All	301	7.9959	10.4369	10.7915	8.4403	5.3769	2.8508	2.2475	0.972	0.3971	0.3844	0.28701		0.4326	0.23861		-0.6505	0.090752		-1.5659	0.00013653	Down	-1.2093	0.13443		-2.5007	0.0047857				Unigene105280_All//9.00E-88//TC149505
Unigene10529_All	293	0.3571	0	1.2722	0.17	0	0	6.0606	3.1382	1.2237	-8.4802	0.37721		1.8329	0.21292		-7.4094	0.56431		-7.4094	0.64554		-0.9495	0.030881		-2.3082	3.0846e-06	Down	Unigene10529_All//gi|115447285|ref|NP_001047422.1|//4.00E-19//Os02g0614100 [Oryza sativa Japonica Group] >gi|113536953|dbj|BAF09336.1| Os02g0614100 [Oryza sativa Japonica Group]	Unigene10529_All//5.00E-11//AT4G32272| FUNCTIONS IN: molecular_function unknown; INVOLVED IN: biological_process unknown; LOCATED IN: cellular_component unknown; CONTAINS InterPro DOMAIN/s: Protein of unknown function DUF250 (InterPro:IPR004853); BEST Arabidopsis thaliana protein match is: UDP-glucuronic acid/UDP-N-acetylgalactosamine transporter-related (TAIR:AT4G31600.1); Has 1302 Blast hits to…	Unigene10529_All//3.00E-94//TC175087			GO:0031224	nr +
Unigene1053_All	1096	2.2437	3.9759	0.9717	1.1817	2.0422	1.6895	1.6202	7.5888	3.9257	0.8254	0.0045434		-1.2073	0.0051413		0.7893	0.066421		0.5157	0.31489		2.2277	2.3659e-24	Up	1.2768	1.5054e-06	Up	Unigene1053_All//gi|90900944|gb|ABE01834.1|//1.00E-82//NAK-type protein kinase [Nicotiana tabacum]	Unigene1053_All//2.00E-54//AT2G39110| protein kinase, putative	Unigene1053_All//0.00E+00//CO113128			GO:0004672//GO:0006464//GO:0032559	nr +
Unigene10530_All	1110	0	0	0	0	0	0	4.7232	1.5062	0.5025	null	null		null	null		null	null		null	null		-1.6489	9.6383e-11	Down	-3.2326	6.2942e-24	Down	Unigene10530_All//gi|27544010|dbj|BAC54829.1|//5.00E-67//vacuolar processing enzyme-2 [Nicotiana tabacum]	Unigene10530_All//2.00E-65//AT2G25940| ALPHA-VPE (alpha-vacuolar processing enzyme); cysteine-type endopeptidase				GO:0004175//GO:0016485	nr -
Unigene105308_All	361	0.7247	0.8422	3.6877	2.4838	0.8585	1.2511	0.2342	0	0	0.2168	0.86487		2.3473	0.00086836	Up	-1.5327	0.033756		-0.9894	0.19583		-7.8716	0.40756		-7.8716	0.36156
Unigene105325_All	691	0.53	0.44	0.4624	1.3697	1.4452	3.6601	0.979	0	0.5189	-0.2685	0.80101		-0.1969	0.86629		0.0774	0.93684		1.418	0.00057109	Up	-9.9352	6.3462e-05	Down	-0.9159	0.22136		Unigene105325_All//gi|14334057|gb|AAK60517.1|AF332974_1//8.00E-53//P450 monooxygenase [Gossypium arboreum]	Unigene105325_All//2.00E-32//AT4G12320| CYP706A6; electron carrier/ heme binding / iron ion binding / monooxygenase/ oxygen binding	Unigene105325_All//1.00E-119//ES819299		ko00945|Stilbenoid, diarylheptanoid and gingerol biosynthesis//ko00903|Limonene and pinene degradation//ko00941|Flavonoid biosynthesis//ko00944|Flavone and flavonol biosynthesis	GO:0005506//GO:0016491	nr -
Unigene10533_All	562	0	0	0	0	0	0	3.0093	2.6029	0.4253	null	null		null	null		null	null		null	null		-0.2093	0.64537		-2.8229	2.8554e-07	Down	Unigene10533_All//gi|116222259|gb|ABJ80993.1|//7.00E-86//beta tubulin [Goniomonas truncata]	Unigene10533_All//1.00E-82//AT5G23860| TUB8; structural constituent of cytoskeleton	Unigene10533_All//4.00E-11//gi|48790617|gb|CO091931.1|CO091931		ko04145|Phagosome	GO:0007017//GO:0015630//GO:0017111//GO:0032561//GO:0032991//GO:0043623	nr +
Unigene105331_All	833	0.0628	0.365	0.3836	0	0.0827	11.6568	0	0	0	2.5391	0.1511		2.6108	0.14596		6.3698	0.61604		13.5089	3.5014e-59	Up	null	null		null	null		Unigene105331_All//sp|Q7Z1M0|VIT1_SOLIN//1.00E-59//Vitellogenin-1 OS=Solenopsis invicta PE=2 SV=1						swissprot -
Unigene105333_All	535	2.2493	5.7773	5.0762	3.6313	4.3125	2.7858	0.3951	1.0156	0.2979	1.3609	0.00022831	Up	1.1743	0.0037994		0.248	0.60827		-0.3824	0.4507		1.362	0.14367		-0.4074	0.75603				Unigene105333_All//1.00E-165//gi|84165968|gb|DR454616.1|DR454616
Unigene105373_All	592	0.1768	0	0	0.0841	0.0582	0.1526	0	1.412	0	-7.466	0.37719		-7.466	0.3992		-0.5311	0.8288		0.8596	0.79693		10.4635	5.5369e-06	Up	null	null		Unigene105373_All//gi|297829824|ref|XP_002882794.1|//3.00E-56//oxidoreductase [Arabidopsis lyrata subsp. lyrata] >gi|297328634|gb|EFH59053.1| oxidoreductase [Arabidopsis lyrata subsp. lyrata]	Unigene105373_All//2.00E-57//AT3G12900| oxidoreductase, 2OG-Fe(II) oxygenase family protein	Unigene105373_All//2.00E-16//TC134433		ko00941|Flavonoid biosynthesis//ko00402|Benzoxazinoid biosynthesis	GO:0008152//GO:0016701//GO:0016706	nr -
Unigene10539_All	397	0	0	0	0	0	0	2.13	1.5792	0	null	null		null	null		null	null		null	null		-0.4317	0.54739		-11.0566	2.2132e-06	Down	Unigene10539_All//sp|P34121|COAA_DICDI//9.00E-17//Coactosin OS=Dictyostelium discoideum GN=coaA PE=1 SV=1						swissprot +
Unigene105402_All	407	0.1286	0	0	0	0.1692	1.6645	0.7272	0.1027	0.7831	-7.0067	0.62083		-7.0067	0.63357		7.4026	0.61602		10.7009	0.00041863	Up	-2.8239	0.08873		0.1068	0.94561
Unigene105414_All	419	3.1218	0.2419	1.398	4.1611	3.2052	0.8623	0.6054	0.1995	0	-3.6899	1.0918e-05	Down	-1.159	0.064494		-0.3766	0.46465		-2.2707	4.5251e-05	Down	-1.6015	0.31137		-9.2417	0.030591		Unigene105414_All//gi|30678256|ref|NP_171720.2|//2.00E-08//ferredoxin-related [Arabidopsis thaliana]	Unigene105414_All//6.00E-09//AT1G02180| ferredoxin-related	Unigene105414_All//6.00E-90//BG440260				nr +
Unigene10542_All	491	0	0	0	0	0	0	5.425	1.4471	3.2455	null	null		null	null		null	null		null	null		-1.9065	6.0721e-07	Down	-0.7412	0.02521				Unigene10542_All//2.00E-12//DR461796
Unigene105426_All	754	0.0694	1.2096	0.565	0.2643	0.274	0.7787	0.6729	0.1109	0.1057	4.1235	0.00023365	Up	3.0252	0.057364		0.052	0.98933		1.5589	0.13585		-2.6011	0.020492		-2.6704	0.01375		Unigene105426_All//gi|226499346|ref|NP_001149805.1|//1.00E-47//CUE domain containing protein [Zea mays] >gi|195634781|gb|ACG36859.1| CUE domain containing protein [Zea mays]	Unigene105426_All//6.00E-35//AT5G32440| LOCATED IN: chloroplast; EXPRESSED IN: 24 plant structures; EXPRESSED DURING: 15 growth stages; CONTAINS InterPro DOMAIN/s: Ubiquitin system component Cue (InterPro:IPR003892); BEST Arabidopsis thaliana protein match is: unknown protein (TAIR:AT1G80040.1); Has 303 Blast hits to 289 proteins in 67 species: Archae - 0; Bacteria - 2; Metazoa - 74; Fungi - 21; …	Unigene105426_All//0.00E+00//gi|21097417|gb|BQ409730.1|BQ409730			GO:0043231	nr +
Unigene10543_All	318	0	0	0	0	0	0	3.191	0.2629	0.7517	null	null		null	null		null	null		null	null		-3.6014	2.3816e-05	Down	-2.0858	0.0015252
Unigene105439_All	454	6.5689	23.7722	11.2599	23.5904	15.018	16.3145	9.2197	8.7458	7.5465	1.8556	2.3706e-20	Up	0.7775	0.0047761		-0.6515	5.0885e-05		-0.532	0.0019424		-0.0761	0.79386		-0.2889	0.289				Unigene105439_All//2.00E-71//gi|164311793|gb|ES851073.1|ES851073
Unigene10544_All	212	0	1.673	0.5024	3.9945	0.3249	1.4912	1.1966	0.7886	0.7517	10.7082	0.024674		8.9727	0.40257		-3.6199	0.00014728	Down	-1.4215	0.073358		-0.6016	0.64843		-0.6707	0.6061
Unigene105450_All	482	3.1479	0.841	0.3314	2.067	0.2858	1.2181	2.2807	0.8671	1.4051	-1.9042	0.0012519		-3.2477	1.3994e-05	Down	-2.8545	0.00023679	Down	-0.7629	0.28863		-1.3952	0.020389		-0.6988	0.21059		Unigene105450_All//gi|222424070|dbj|BAH19995.1|//5.00E-19//AT4G28760 [Arabidopsis thaliana]	Unigene105450_All//7.00E-12//AT4G28760| unknown protein	Unigene105450_All//7.00E-59//gi|78343612|gb|DT563886.1|DT563886			GO:0005488	nr -
Unigene105454_All	484	0.4324	0	0	0	0.6403	1.3064	0.0874	0	0	-8.7562	0.12268		-8.7562	0.14671		9.3226	0.045484		10.3514	0.00076029	Up	-6.4496	0.66364		-6.4496	0.61778		Unigene105454_All//gi|225458882|ref|XP_002283431.1|//4.00E-09//PREDICTED: hypothetical protein [Vitis vinifera] >gi|302142175|emb|CBI19378.3| unnamed protein product [Vitis vinifera]	Unigene105454_All//6.00E-06//AT1G10140| FUNCTIONS IN: molecular_function unknown; INVOLVED IN: biological_process unknown; LOCATED IN: plasma membrane; EXPRESSED IN: 23 plant structures; EXPRESSED DURING: 13 growth stages; CONTAINS InterPro DOMAIN/s: Uncharacterised conserved protein UCP031279 (InterPro:IPR016972); BEST Arabidopsis thaliana protein match is: unknown protein (TAIR:AT1G58420.1); Ha…	Unigene105454_All//0.00E+00//DW512687				nr +
Unigene105469_All	585	0.7155	0.7795	0.4551	0.4258	0.8241	1.6212	0.9396	0	0.1362	0.1236	0.91141		-0.6528	0.59412		0.9526	0.42367		1.9288	0.014769		-9.8759	0.00046198	Down	-2.7863	0.0079679		Unigene105469_All//gi|18406084|ref|NP_565988.1|//9.00E-20//PAR1 (PHY RAPIDLY REGULATED 1) [Arabidopsis thaliana] >gi|4512668|gb|AAD21722.1| expressed protein [Arabidopsis thaliana] >gi|83776541|tpe|CAJ55345.1| TPA: helix-loop-helix protein [Arabidopsis thaliana]	Unigene105469_All//4.00E-17//AT2G42870| PAR1 (PHY RAPIDLY REGULATED 1)	Unigene105469_All//4.00E-119//TC160093				nr +
Unigene10547_All	230	0	6.1685	2.0837	0	0	0	0	0	0	12.5907	4.0637e-08	Up	11.0249	0.0074964		null	null		null	null		null	null		null	null								ESTscan -
Unigene105471_All	605	1.3837	1.4238	1.7603	2.5525	1.4229	1.3437	2.0965	0.3454	2.1072	0.0412	0.97426		0.3473	0.62893		-0.8431	0.10064		-0.9257	0.085768		-2.6016	5.1393e-05	Down	0.0073	0.98942		Unigene105471_All//gi|240254425|ref|NP_178255.4|//7.00E-42//ATP binding / kinase [Arabidopsis thaliana]	Unigene105471_All//4.00E-43//AT2G01460| ATP binding / kinase	Unigene105471_All//0.00E+00//ES849346				nr +
Unigene105490_All	200	1.308	2.0268	3.4612	0.9963	1.5496	6.0971	1.2684	1.6718	3.9839	0.6318	0.60144		1.4039	0.13898		0.6372	0.69514		2.6135	0.00039334	Up	0.3984	0.72434		1.6512	0.02319				Unigene105490_All//5.00E-107//TC170854
Unigene1055_All	367	4.2769	1.5187	4.2078	13.9806	15.9509	16.6132	3.8018	2.7332	1.0855	-1.4937	0.0067299		-0.0235	0.9867		0.1902	0.51981		0.2489	0.36471		-0.4761	0.37365		-1.8083	0.00060991	Down	Unigene1055_All//gi|85069287|gb|ABC69715.1|//1.00E-35//auxin response factor 4 [Solanum lycopersicum]	Unigene1055_All//1.00E-22//AT5G60450| ARF4 (AUXIN RESPONSE FACTOR 4); transcription factor	Unigene1055_All//6.00E-142//gi|48807809|gb|CO109123.1|CO109123	ARF		GO:0001708//GO:0005488//GO:0006350//GO:0009725//GO:0009791//GO:0010468	nr +
Unigene105501_All	200	31.6541	11.1473	13.3125	61.5205	56.646	58.9382	42.703	13.7926	20.1185	-1.5057	2.3637e-09	Down	-1.2496	7.1699e-07	Down	-0.1191	0.55246		-0.0619	0.73604		-1.6304	9.3311e-17	Down	-1.0858	1.1092e-09	Down			Unigene105501_All//3.00E-96//gi|13248510|gb|BF277159.2|BF277159
Unigene10553_All	264	0	0	0	9.0571	3.3914	1.0264	0.8008	0	0	null	null		null	null		-1.4172	0.00031167	Down	-3.1415	2.5328e-09	Down	-9.6453	0.074822		-9.6453	0.058356		Unigene10553_All//gi|186509725|ref|NP_001118563.1|//1.00E-11//WOX11 (WUSCHEL related homeobox 11); DNA binding / transcription factor [Arabidopsis thaliana]	Unigene10553_All//5.00E-13//AT3G03660| WOX11 (WUSCHEL related homeobox 11); DNA binding / transcription factor	Unigene10553_All//7.00E-110//TC173647	HB		GO:0001071//GO:0003677//GO:0006351//GO:0009536//GO:0010468	nr -
Unigene10554_All	284	0	0	0	7.1915	2.0613	1.2722	0.1489	0	0.1403	null	null		null	null		-1.8027	5.3456e-05	Down	-2.499	1.8668e-06	Down	-7.2182	0.66359		-0.0858	0.97408
Unigene10555_All	394	0	12.8603	6.7576	0	0	0.2293	0	0	0	13.6506	6.8794e-29	Up	12.7223	1.0736e-14	Up	null	null		7.8411	0.48144		null	null		null	null		Unigene10555_All//gi|14423905|sp|Q9XGL4.1|RL31_CYAPA//1.00E-44//RecName: Full=60S ribosomal protein L31 >gi|5123727|emb|CAB45375.1| ribosomal protein L31 [Cyanophora paradoxa]	Unigene10555_All//1.00E-29//AT4G26230| 60S ribosomal protein L31 (RPL31B)			ko03010|Ribosome	GO:0005198//GO:0010467//GO:0030529//GO:0044267	nr +
Unigene10556_All	344	0	1.0311	0.3096	0	0.6006	0.1313	0.4916	2.916	4.4008	10.01	0.024673		8.2743	0.4025		9.2303	0.15747		7.0367	0.70335		2.5684	0.00047886	Up	3.1622	4.0441e-07	Up	Unigene10556_All//gi|30679545|ref|NP_179190.2|//2.00E-13//phox (PX) domain-containing protein [Arabidopsis thaliana]	Unigene10556_All//7.00E-15//AT2G15900| phox (PX) domain-containing protein					nr +
Unigene105576_All	203	0	0.7488	0	0	0	0.445	1.4579	4.7355	10.0087	9.5484	0.23664		null	null		null	null		8.7977	0.48141		1.6996	0.011678		2.7793	2.5863e-08	Up
Unigene10558_All	422	0.6199	3.9623	1.2618	2.833	2.2848	1.2843	0	0	0	2.6762	1.9893e-05	Up	1.0254	0.34249		-0.3103	0.60745		-1.1413	0.071538		null	null		null	null		Unigene10558_All//gi|13877599|gb|AAK43877.1|AF370500_1//2.00E-32//Unknown protein [Arabidopsis thaliana] >gi|28059703|gb|AAO30085.1| Unknown protein [Arabidopsis thaliana]	Unigene10558_All//1.00E-33//AT2G40150| INVOLVED IN: biological_process unknown; EXPRESSED IN: 21 plant structures; EXPRESSED DURING: 13 growth stages; CONTAINS InterPro DOMAIN/s: Protein of unknown function DUF231, plant (InterPro:IPR004253); BEST Arabidopsis thaliana protein match is: ESK1 (ESKIMO 1) (TAIR:AT3G55990.1); Has 712 Blast hits to 693 proteins in 16 species: Archae - 0; Bacteria - 0; …	Unigene10558_All//7.00E-68//EE592863			GO:0006970//GO:0009409//GO:0010557	nr +
Unigene105591_All	203	61.0839	29.2036	32.5271	74.1078	66.4957	120.362	70.8141	54.7668	36.5024	-1.0646	1.3975e-10	Down	-0.9091	6.2897e-08		-0.1564	0.33238		0.6997	8.8766e-11		-0.3707	0.0055689		-0.956	6.8622e-13		Unigene105591_All//gi|13877126|gb|AAK43709.1|AF358665_1//7.00E-07//ribosomal protein L32 [Mercurialis annua] >gi|13899053|gb|AAK48948.1|AF370436_1 ribosomal protein L32 [Mercurialis annua] >gi|13899055|gb|AAK48949.1|AF370437_1 ribosomal protein L32 [Mercurialis annua] >gi|13899057|gb|AAK48950.1|AF370438_1 ribosomal protein L32 [Mercurialis annua]		Unigene105591_All//5.00E-70//TC152244		ko03010|Ribosome		nr +
Unigene1056_All	3063	9.5998	5.1447	4.1724	28.0215	29.1626	36.6704	7.73	4.6394	3.0045	-0.8999	2.2903e-18		-1.2021	5.948e-28	Down	0.0576	0.40038		0.3881	1.126e-16		-0.7365	3.8963e-13		-1.3633	8.2676e-36	Down	Unigene1056_All//gi|85069287|gb|ABC69715.1|//0.00E+00//auxin response factor 4 [Solanum lycopersicum]	Unigene1056_All//0.00E+00//AT5G60450| ARF4 (AUXIN RESPONSE FACTOR 4); transcription factor	Unigene1056_All//0.00E+00//gi|48807809|gb|CO109123.1|CO109123	ARF		GO:0001071//GO:0001708//GO:0003676//GO:0005515//GO:0006351//GO:0009755//GO:0009791//GO:0010468//GO:0043231	nr +
Unigene10562_All	1852	0	0.2189	0.23	0.269	0.3719	0.5365	0.2283	0.4288	3.6139	7.7741	0.013615		7.8455	0.013856		0.4673	0.61249		0.996	0.17191		0.9094	0.21129		3.9846	2.6851e-35	Up	Unigene10562_All//gi|195619326|gb|ACG31493.1|//3.00E-18//harpin-induced protein [Zea mays]	Unigene10562_All//2.00E-14//AT2G01080| FUNCTIONS IN: molecular_function unknown; INVOLVED IN: biological_process unknown; LOCATED IN: plasma membrane; EXPRESSED IN: 14 plant structures; EXPRESSED DURING: 6 growth stages; CONTAINS InterPro DOMAIN/s: Harpin-induced 1 (InterPro:IPR010847); BEST Arabidopsis thaliana protein match is: unknown protein (TAIR:AT3G54200.1); Has 388 Blast hits to 387 prote…	Unigene10562_All//6.00E-10//TC149098				nr -
Unigene105620_All	204	0	1.4903	0	0	1.0128	3.5422	0	0	0.1953	10.5414	0.044485		null	null		9.9841	0.15747		11.7904	0.00023102	Up	null	null		7.6095	0.64814
Unigene10563_All	339	1.2347	0.8968	1.2566	2.645	2.6411	0.3997	2.6191	0.7397	0.3526	-0.4613	0.65035		0.0254	1.0009		-0.0021	0.97768		-2.7263	0.0020613		-1.8241	0.010777		-2.893	0.00030454	Down	Unigene10563_All//gi|297818068|ref|XP_002876917.1|//8.00E-27//nsp-interacting kinase 2 [Arabidopsis lyrata subsp. lyrata] >gi|297322755|gb|EFH53176.1| nsp-interacting kinase 2 [Arabidopsis lyrata subsp. lyrata]	Unigene10563_All//3.00E-24//AT3G25560| NIK2 (NSP-INTERACTING KINASE 2); ATP binding / protein binding / protein kinase/ protein serine/threonine kinase			ko04626|Plant-pathogen interaction	GO:0004672//GO:0006464//GO:0031224//GO:0031410//GO:0032559	nr +
Unigene105633_All	204	2.3083	4.9676	9.136	9.0349	5.064	5.7561	1.2435	0.4098	1.7576	1.1057	0.11294		1.9847	0.00031676	Up	-0.8352	0.070189		-0.6504	0.19193		-1.6014	0.31133		0.4992	0.62756		Unigene105633_All//gi|224130518|ref|XP_002328629.1|//1.00E-10//tir-nbs-lrr resistance protein [Populus trichocarpa] >gi|222838611|gb|EEE76976.1| tir-nbs-lrr resistance protein [Populus trichocarpa]		Unigene105633_All//2.00E-63//TC135081				nr +
Unigene105635_All	204	46.6784	79.4815	44.897	63.9771	75.9602	97.6326	195.857	261.019	83.1924	0.7679	3.7229e-08		-0.0561	0.78058		0.2477	0.095853		0.6098	3.984e-07		0.4144	1.265e-10		-1.2353	1.9161e-51	Down	Unigene105635_All//gi|38194890|gb|AAR13288.1|//4.00E-17//Anx1 [Gossypium hirsutum]	Unigene105635_All//1.00E-12//AT5G65020| ANNAT2 (Annexin Arabidopsis 2); calcium ion binding / calcium-dependent phospholipid binding	Unigene105635_All//2.00E-106//TC139742				nr -
Unigene10564_All	426	0.2456	13.9163	3.25	0	0	0	0	0	0	5.8243	1.2694e-30	Up	3.7261	1.0491e-05	Up	null	null		null	null		null	null		null	null		Unigene10564_All//gi|115441859|ref|NP_001045209.1|//3.00E-10//Os01g0919200 [Oryza sativa Japonica Group] >gi|57899841|dbj|BAD87625.1| fibroin heavy chain Fib-H-like [Oryza sativa Japonica Group] >gi|113534740|dbj|BAF07123.1| Os01g0919200 [Oryza sativa Japonica Group]				ko03040|Spliceosome		nr +
Unigene10568_All	276	0	0.3672	0	2.3463	0.1248	1.1454	0.3064	0.9086	0.433	8.5204	0.39087		null	null		-4.2327	0.0005944	Down	-1.0345	0.26823		1.5682	0.32679		0.499	0.80866
Unigene10569_All	340	2.3083	2.0864	0.6265	3.5163	4.2538	2.7895	26.2386	21.7584	5.3899	-0.1458	0.83749		-1.8814	0.041307		0.2747	0.6543		-0.3341	0.63913		-0.2701	0.14126		-2.2834	8.156e-28	Down			Unigene10569_All//3.00E-85//BQ402008
Unigene1057_All	999	0.6809	0.1014	0	4.6374	6.0322	2.7577	14.9398	10.9614	3.4296	-2.7474	0.010571		-9.4113	0.00076471	Down	0.3794	0.13079		-0.7499	0.0068375		-0.4467	0.00054951		-2.123	4.6441e-42	Down	Unigene1057_All//gi|224126613|ref|XP_002329598.1|//1.00E-108//cationic amino acid transporter [Populus trichocarpa] >gi|222870307|gb|EEF07438.1| cationic amino acid transporter [Populus trichocarpa]	Unigene1057_All//2.00E-63//AT5G04770| CAT6 (CATIONIC AMINO ACID TRANSPORTER 6); amino acid transmembrane transporter/ basic amino acid transmembrane transporter/ cationic amino acid transmembrane transporter	Unigene1057_All//5.00E-77//TC146944			GO:0006810//GO:0015171//GO:0016020//GO:0043231//GO:0051707	nr -
Unigene105701_All	207	21.9899	8.8121	14.1485	15.6421	13.3083	14.1817	44.7312	9.4899	8.6606	-1.3193	7.6648e-06	Down	-0.6362	0.032032		-0.2331	0.55734		-0.1414	0.69223		-2.2368	3.0744e-27	Down	-2.3687	4.0961e-30	Down			Unigene105701_All//1.00E-76//gi|21089134|gb|BQ401447.1|BQ401447
Unigene10572_All	301	0	0	0	0.1655	0	0	3.0902	1.6663	0.3971	null	null		null	null		-7.3707	0.56415		-7.3707	0.64546		-0.8911	0.17165		-2.9601	0.00017176	Down	Unigene10572_All//gi|297810727|ref|XP_002873247.1|//3.00E-09//carboxy-lyase [Arabidopsis lyrata subsp. lyrata] >gi|297319084|gb|EFH49506.1| carboxy-lyase [Arabidopsis lyrata subsp. lyrata]	Unigene10572_All//2.00E-10//AT5G06300| carboxy-lyase					nr +
Unigene105733_All	209	3.2544	5.3336	4.3313	0.9534	2.3067	2.8092	1.0115	3.3997	10.2932	0.7127	0.26949		0.4124	0.5939		1.2747	0.29244		1.559	0.13585		1.7489	0.032083		3.3471	2.5855e-10	Up			Unigene105733_All//3.00E-22//EX169656
Unigene105742_All	209	0.2503	4.6063	1.5287	0	0.4943	1.2966	0.2023	0.2	0.3812	4.2019	0.00012946	Up	2.6106	0.14595		8.9492	0.45857		10.3405	0.070558		-0.0165	1.0065		0.9141	0.75152		Unigene105742_All//gi|297803414|ref|XP_002869591.1|//2.00E-20//GDSL-motif lipase/hydrolase family protein [Arabidopsis lyrata subsp. lyrata] >gi|297315427|gb|EFH45850.1| GDSL-motif lipase/hydrolase family protein [Arabidopsis lyrata subsp. lyrata]	Unigene105742_All//8.00E-22//AT4G26790| GDSL-motif lipase/hydrolase family protein	Unigene105742_All//3.00E-108//CO090421				nr +
Unigene105744_All	209	65.3384	36.1232	30.8289	98.9134	74.4725	105.021	242.555	117.188	98.167	-0.855	2.8188e-08		-1.0836	2.3886e-11	Down	-0.4095	0.00029586		0.0864	0.56355		-1.0495	7.8133e-49	Down	-1.305	8.6933e-71	Down	Unigene105744_All//gi|73761683|gb|AAZ83341.1|//6.00E-36//ubiquitin extension protein [Gossypium hirsutum]	Unigene105744_All//1.00E-24//AT2G47110| UBQ6; protein binding	Unigene105744_All//2.00E-100//ES822113		ko03010|Ribosome		nr -
Unigene105748_All	209	0.2503	2.1819	0	0	0.4943	3.6736	0	0.2	0.1906	3.1239	0.035828		-7.9675	0.63335		8.9492	0.45856		11.843	0.00012687	Up	7.6439	0.63839		7.5744	0.64808
Unigene105759_All	210	0.7474	0	0	101.763	89.5317	41.0772	0.4027	0.5971	0	-9.5457	0.21689		-9.5457	0.24639		-0.1847	0.14831		-1.3088	4.0057e-26	Down	0.5683	0.78319		-8.6536	0.36144		Unigene105759_All//gi|186510343|ref|NP_001078202.2|//1.00E-26//LSH4 (LIGHT SENSITIVE HYPOCOTYLS 4) [Arabidopsis thaliana]	Unigene105759_All//6.00E-28//AT3G23290| LSH4 (LIGHT SENSITIVE HYPOCOTYLS 4)	Unigene105759_All//2.00E-103//TC160625				nr +
Unigene105761_All	210	0.7474	0	0	0	0.164	3.0109	0.4027	0.199	0	-9.5457	0.21689		-9.5457	0.24638		7.3576	0.83959		11.556	0.00076024	Up	-1.0169	0.72651		-8.6536	0.36143				Unigene105761_All//7.00E-91//AI728016				ESTscan +
Unigene105767_All	210	0.9966	1.9303	4.8179	0.4744	1.8038	6.4519	0	0.5971	1.5177	0.9537	0.41403		2.2733	0.0057664		1.9269	0.19413		3.7655	4.5749e-06	Up	9.2218	0.24106		10.5677	0.013423
Unigene105773_All	211	20.0852	5.0429	6.814	12.7487	10.9344	33.1769	58.9117	27.7318	19.2585	-1.9938	2.9615e-09	Down	-1.5596	1.8567e-06	Down	-0.2215	0.59327		1.3798	1.7183e-09	Up	-1.087	2.7998e-13	Down	-1.6131	1.9504e-24	Down			Unigene105773_All//9.00E-41//gi|78330471|gb|DT550745.1|DT550745
Unigene105778_All	211	0.248	4.0824	0.5047	4.2496	3.1008	1.4983	2.4046	0.7923	1.3217	4.041	0.00042007	Up	1.0251	0.70471		-0.4547	0.55808		-1.504	0.050902		-1.6017	0.10686		-0.8634	0.33896				Unigene105778_All//6.00E-14//ES803332
Unigene105779_All	211	0	0.2401	0	0	0.3264	4.2809	0.2004	0	0.5664	7.9075	0.62209		null	null		8.3505	0.61589		12.0637	2.0704e-05	Up	-7.6467	0.66343		1.4989	0.55893		Unigene105779_All//gi|297809467|ref|XP_002872617.1|//5.00E-14//pentatricopeptide repeat-containing protein [Arabidopsis lyrata subsp. lyrata] >gi|297318454|gb|EFH48876.1| pentatricopeptide repeat-containing protein [Arabidopsis lyrata subsp. lyrata]	Unigene105779_All//4.00E-15//AT4G11690| pentatricopeptide (PPR) repeat-containing protein					nr +
Unigene10579_All	235	0	0.2156	0	0.212	0.5861	0.1922	8.9958	2.8457	5.2553	7.7522	0.62209		null	null		1.4671	0.61991		-0.1415	0.95674		-1.6605	7.9764e-05	Down	-0.7755	0.040614				Unigene10579_All//2.00E-38//DW480207
Unigene105797_All	212	0	1.434	0.2512	2.1148	0.1624	2.1303	312.913	200.304	856.906	10.4858	0.044483		7.9727	0.64138		-3.7029	0.01067		0.0105	0.99992		-0.6436	5.1367e-28		1.4534	8.6576e-294	Up	Unigene105797_All//gi|40218371|gb|AAR83118.1|//8.00E-38//secretory laccase [Gossypium arboreum]	Unigene105797_All//7.00E-23//AT5G48100| TT10 (TRANSPARENT TESTA 10); copper ion binding / laccase	Unigene105797_All//6.00E-116//TC137114		ko00053|Ascorbate and aldarate metabolism		nr +
Unigene1058_All	2372	0.6617	0.8972	0.8082	12.9996	10.1186	9.9009	16.8087	7.4711	5.2905	0.4393	0.33278		0.2885	0.57185		-0.3615	6.6525e-05		-0.3928	3.4397e-05		-1.1698	8.0254e-46	Down	-1.6677	3.3634e-80	Down	Unigene1058_All//gi|224137956|ref|XP_002326482.1|//0.00E+00//cationic amino acid transporter [Populus trichocarpa] >gi|222833804|gb|EEE72281.1| cationic amino acid transporter [Populus trichocarpa]	Unigene1058_All//2.00E-128//AT5G04770| CAT6 (CATIONIC AMINO ACID TRANSPORTER 6); amino acid transmembrane transporter/ basic amino acid transmembrane transporter/ cationic amino acid transmembrane transporter	Unigene1058_All//6.00E-60//TC146944			GO:0005275//GO:0015837//GO:0031224//GO:0043231	nr -
Unigene10580_All	287	55.6023	550.479	210.588	33.3252	81.9488	117.079	29.4635	78.2032	120.21	3.3075	0	Up	1.9212	1.2025e-113	Up	1.2981	1.6044e-30	Up	1.8128	2.2785e-64	Up	1.4083	1.4879e-34	Up	2.0286	1.5012e-89	Up	Unigene10580_All//gi|210062232|gb|ACJ06165.1|//7.00E-18//HVA22E [Arabidopsis thaliana]	Unigene10580_All//3.00E-19//AT5G50720| ATHVA22E	Unigene10580_All//7.00E-104//TC166347			GO:0031224//GO:0050896	nr -
Unigene105815_All	213	259.393	338.034	364	402.256	333.198	396.505	311.643	248.812	130.364	0.382	4.6314e-10		0.4888	6.6909e-16		-0.2717	1.4578e-07		-0.0208	0.76359		-0.3248	1.4095e-08		-1.2573	2.8953e-87	Down	Unigene105815_All//gi|225427492|ref|XP_002263421.1|//3.00E-13//PREDICTED: similar to Os03g0576600 [Vitis vinifera]		Unigene105815_All//3.00E-102//gi|84164696|gb|DR453344.1|DR453344				nr +
Unigene105816_All	213	2899.75	970.332	3168.25	428.683	469.322	300.241	0	0	0	-1.5794	0	Down	0.1278	6.2816e-11		0.1307	0.013406		-0.5138	1.1775e-22		null	null		null	null				Unigene105816_All//2.00E-69//gi|21093041|gb|BQ405354.1|BQ405354
Unigene10584_All	274	0.5729	1.1095	0.3887	2.1816	4.0216	4.4504	4.1663	0.3051	0.4362	0.9536	0.5036		-0.5596	0.7765		0.8824	0.19389		1.0285	0.10717		-3.7714	3.8979e-06	Down	-3.2557	8.9369e-06	Down
Unigene105840_All	215	0.9734	2.5924	0.9907	3.7071	4.0041	15.7547	4.3263	4.2768	11.1178	1.4132	0.16904		0.0254	1.0038		0.1112	0.90397		2.0874	3.1118e-08	Up	-0.0166	1.0164		1.3617	0.00024462	Up	Unigene105840_All//gi|15233476|ref|NP_192343.1|//2.00E-21//early-responsive to dehydration protein-related / ERD protein-related [Arabidopsis thaliana] >gi|30679712|ref|NP_849296.1| early-responsive to dehydration protein-related / ERD protein-related [Arabidopsis thaliana] >gi|30679715|ref|NP_849297.1| early-responsive to dehydration protein-related / ERD protein-related [Arabidopsis thaliana]	Unigene105840_All//5.00E-23//AT1G11960| FUNCTIONS IN: molecular_function unknown; INVOLVED IN: biological_process unknown; LOCATED IN: plasma membrane; EXPRESSED IN: 22 plant structures; EXPRESSED DURING: 13 growth stages; CONTAINS InterPro DOMAIN/s: Protein of unknown function DUF221 (InterPro:IPR003864); BEST Arabidopsis thaliana protein match is: early-responsive to dehydration protein-related…	Unigene105840_All//1.00E-36//TC131090				nr -
Unigene105841_All	215	8.7607	5.4205	1.2384	18.5355	14.2546	15.3345	8.6527	5.6376	6.6707	-0.6926	0.13941		-2.8226	5.0098e-06	Down	-0.3789	0.22703		-0.2735	0.41998		-0.6181	0.15199		-0.3753	0.37714				Unigene105841_All//3.00E-99//TC132167
Unigene105844_All	215	0	0	0.4953	0	0.1602	9.4528	0	0	0	null	null		8.9522	0.4024		7.3237	0.83957		13.2065	3.8916e-12	Up	null	null		null	null		Unigene105844_All//sp|Q9U8M0|VIT1_PERAM//2.00E-11//Vitellogenin-1 OS=Periplaneta americana GN=VG2 PE=2 SV=1						swissprot +
Unigene105859_All	216	0	0	0	0	0.6377	2.9273	0.1957	0.1935	0	null	null		null	null		9.3167	0.32022		11.5154	0.00076019	Up	-0.0163	1.0065		-7.6125	0.61762		Unigene105859_All//gi|15226939|ref|NP_178341.1|//3.00E-10//AtPP2-B10 (Phloem protein 2-B10); carbohydrate binding [Arabidopsis thaliana] >gi|75268076|sp|Q9ZVQ6.1|P2B10_ARATH RecName: Full=F-box protein PP2-B10; AltName: Full=Protein PHLOEM PROTEIN 2-LIKE B10; Short=AtPP2-B10 >gi|107738391|gb|ABF83689.1| At2g02360 [Arabidopsis thaliana]	Unigene105859_All//1.00E-11//AT2G02360| AtPP2-B10 (Phloem protein 2-B10); carbohydrate binding	Unigene105859_All//7.00E-54//gi|109843286|gb|DW241844.1|DW241844				nr -
Unigene10586_All	430	0	0.3535	0	1.1585	1.0411	0.105	1.1799	0	0.5559	8.4656	0.2366		null	null		-0.1541	0.84973		-3.4638	0.016084		-10.2044	0.00089095	Down	-1.0858	0.22835		Unigene10586_All//gi|297721755|ref|NP_001173241.1|//2.00E-75//Os03g0119966 [Oryza sativa Japonica Group] >gi|27452910|gb|AAO15294.1| Hypothetical protein [Oryza sativa Japonica Group] >gi|217415974|dbj|BAH03170.1| NAC protein [Oryza sativa Japonica Group] >gi|255674164|dbj|BAH91969.1| Os03g0119966 [Oryza sativa Japonica Group]	Unigene10586_All//4.00E-75//AT1G65910| anac028 (Arabidopsis NAC domain containing protein 28); transcription factor		NAC		GO:0001071//GO:0003676//GO:0010468//GO:0032501	nr +
Unigene105860_All	216	40.694	26.9768	24.1597	30.9033	36.6672	61.0542	57.3523	34.8298	18.6282	-0.5931	0.0022592		-0.7522	0.00019853		0.2467	0.28568		0.9823	2.1765e-10		-0.7195	5.269e-07		-1.6224	1.4954e-24	Down			Unigene105860_All//2.00E-94//TC156390
Unigene10588_All	313	199.421	160.264	218.274	6.366	14.7423	4.4731	0	0	0	-0.3154	2.0069e-06		0.1303	0.068267		1.2115	9.9528e-06	Up	-0.5091	0.29406		null	null		null	null				Unigene10588_All//4.00E-155//gi|164342758|gb|ES843169.1|ES843169
Unigene105883_All	217	126.824	328.534	286.372	92.2825	150.912	83.4586	0	0.963	0	1.3732	6.6115e-85	Up	1.1751	1.2154e-56	Up	0.7096	6.2574e-16		-0.145	0.31258		9.9114	0.078723		null	null				Unigene105883_All//5.00E-98//DW515441
Unigene10589_All	445	0	6.1487	2.9916	0	0	0	0	0	0	12.5861	1.443e-15	Up	11.5467	2.3993e-07	Up	null	null		null	null		null	null		null	null
Unigene105896_All	218	764.652	322.843	795.086	112.653	160.487	55.3148	0.1939	0.3834	0.5482	-1.244	1.3582e-170	Down	0.0563	0.23624		0.5106	1.143e-09		-1.0262	1.883e-20	Down	0.9835	0.73296		1.4994	0.55892		Unigene105896_All//gi|1345698|sp|P27518.2|CB21_GOSHI//7.00E-28//RecName: Full=Chlorophyll a-b binding protein 151, chloroplastic; AltName: Full=LHCII type II CAB-151; Short=LHCP; Flags: Precursor >gi|452314|emb|CAA38025.1| chlorophyll ab binding protein [Gossypium hirsutum]	Unigene105896_All//3.00E-27//AT3G27690| LHCB2.3; chlorophyll binding	Unigene105896_All//4.00E-80//ES834749		ko00196|Photosynthesis - antenna proteins		nr +
Unigene1059_All	1930	0.0271	0.105	0	2.0132	1.3917	1.2636	5.871	3.0318	1.672	1.954	0.37567		-4.7602	0.63318		-0.5326	0.079467		-0.672	0.030441		-0.9534	5.66e-10		-1.812	3.4523e-26	Down	Unigene1059_All//gi|224137956|ref|XP_002326482.1|//0.00E+00//cationic amino acid transporter [Populus trichocarpa] >gi|222833804|gb|EEE72281.1| cationic amino acid transporter [Populus trichocarpa]	Unigene1059_All//3.00E-142//AT5G04770| CAT6 (CATIONIC AMINO ACID TRANSPORTER 6); amino acid transmembrane transporter/ basic amino acid transmembrane transporter/ cationic amino acid transmembrane transporter	Unigene1059_All//9.00E-77//TC146944			GO:0005275//GO:0015837//GO:0031224//GO:0043231	nr +
Unigene105905_All	218	0.24	2.7891	0	3.4276	7.1082	10.9801	1.1637	1.7255	1.6447	3.5387	0.0072455		-7.9069	0.63326		1.0523	0.05016		1.6796	0.0001192	Up	0.5683	0.63777		0.4991	0.62755
Unigene10591_All	373	0.8416	1.3584	5.996	3.3388	2.2157	2.6638	0.3401	0.6723	0.1068	0.6907	0.49942		2.8328	4.0623e-07	Up	-0.5916	0.31809		-0.3258	0.64071		0.9831	0.51787		-1.671	0.47828		Unigene10591_All//gi|50512300|gb|AAT77547.1|//6.00E-20//9A [Solanum pimpinellifolium]	Unigene10591_All//2.00E-17//AT3G11080| AtRLP35 (Receptor Like Protein 35); kinase/ protein binding					nr +
Unigene105912_All	219	83.3789	23.5995	83.1575	19.7892	20.2838	8.4552	0	0	0.1819	-1.8209	2.4447e-33	Down	-0.0038	1.0012		0.0356	0.92526		-1.2268	2.6655e-05	Down	null	null		7.507	0.64803				Unigene105912_All//3.00E-102//TC132557
Unigene105917_All	219	7.1672	6.2469	5.5925	12.0555	14.7804	11.5486	1.3514	6.6797	0.9096	-0.1983	0.68497		-0.3579	0.52047		0.294	0.4544		-0.062	0.89137		2.3053	4.9273e-05	Up	-0.5712	0.62828		Unigene105917_All//gi|195625106|gb|ACG34383.1|//2.00E-08//mannose-1-phosphate guanyltransferase [Zea mays]		Unigene105917_All//6.00E-73//TC166316				nr +
Unigene105924_All	219	0	0	0	0	0.1572	12.1673	0	0	0	null	null		null	null		7.2965	0.83952		13.5707	5.7523e-16	Up	null	null		null	null								ESTscan -
Unigene105938_All	220	1.4269	0	0	1.8114	2.974	7.3904	2.4984	0.5699	0.5433	-10.4787	0.036668		-10.4787	0.049323		0.7153	0.46468		2.0285	0.00039773	Up	-2.1322	0.033171		-2.2012	0.022432		Unigene105938_All//gi|297793507|ref|XP_002864638.1|//8.00E-27//protein-s-isoprenylcysteine O-methyltransferase [Arabidopsis lyrata subsp. lyrata] >gi|297310473|gb|EFH40897.1| protein-s-isoprenylcysteine O-methyltransferase [Arabidopsis lyrata subsp. lyrata]	Unigene105938_All//2.00E-28//AT5G59500| unknown protein	Unigene105938_All//2.00E-51//ES841908				nr +
Unigene10594_All	240	1.09	1.2667	0.6656	3.5285	3.3	0.1882	0.1762	0.1741	0	0.2167	0.86485		-0.7116	0.62216		-0.0966	0.87749		-4.2287	0.00021781	Down	-0.0173	1.0065		-7.4611	0.61756				Unigene10594_All//1.00E-55//ES839899
Unigene105942_All	220	119.387	299.41	236.962	102.346	140.402	112.909	0.3844	0	0.1811	1.3265	1.794e-74	Up	0.989	4.6987e-36		0.4561	4.2219e-07		0.1417	0.26471		-8.5865	0.40732		-1.0858	0.67769		Unigene105942_All//gi|15294284|gb|AAK95319.1|AF410333_1//5.00E-07//AT3g62730/F26K9_160 [Arabidopsis thaliana] >gi|20147275|gb|AAM10351.1| AT3g62730/F26K9_160 [Arabidopsis thaliana]		Unigene105942_All//4.00E-83//TC159115				nr -
Unigene105946_All	220	0.9513	1.3819	8.2295	3.6229	2.974	5.7481	0.1922	0.5699	0.3622	0.5387	0.67185		3.1128	2.2788e-06	Up	-0.2847	0.72132		0.6659	0.29883		1.5681	0.54623		0.9142	0.75143								ESTscan +
Unigene105952_All	221	27.4625	19.9468	24.5769	23.8928	23.3724	25.1362	13.0093	12.8602	5.2277	-0.4613	0.057422		-0.1602	0.5644		-0.0318	0.90994		0.0732	0.7927		-0.0166	0.9954		-1.3153	6.9942e-05	Down			Unigene105952_All//7.00E-51//TC155713
Unigene105963_All	221	0.4735	4.1269	1.4457	1.3524	1.714	4.0872	13.5832	3.9715	10.8159	3.1236	0.0011376		1.6103	0.3051		0.3418	0.83588		1.5956	0.043438		-1.7741	4.375e-07	Down	-0.3287	0.31422				Unigene105963_All//1.00E-67//gi|164369257|gb|ES850707.1|ES850707
Unigene10598_All	224	0.4672	0	0.2377	0.4448	0	0.8065	80.0304	50.1922	866.49	-8.8679	0.37695		-0.9749	0.72225		-8.797	0.31726		0.8585	0.69627		-0.6731	8.7575e-09		3.4366	0	Up	Unigene10598_All//gi|3970689|emb|CAA77191.1|//1.00E-14//(+)-delta-cadinene synthase [Gossypium arboreum]		Unigene10598_All//3.00E-13//gi|73861227|gb|DT463966.1|DT463966			GO:0010334//GO:0046872	nr +
Unigene1060_All	1955	0.0803	0.1037	0.1907	3.6692	2.2898	2.726	4.8444	0.9834	1.5691	0.3689	0.81693		1.2478	0.36584		-0.6802	0.00081602		-0.4287	0.055356		-2.3005	8.6007e-29	Down	-1.6264	4.9153e-19	Down	Unigene1060_All//gi|224137956|ref|XP_002326482.1|//0.00E+00//cationic amino acid transporter [Populus trichocarpa] >gi|222833804|gb|EEE72281.1| cationic amino acid transporter [Populus trichocarpa]	Unigene1060_All//9.00E-144//AT5G04770| CAT6 (CATIONIC AMINO ACID TRANSPORTER 6); amino acid transmembrane transporter/ basic amino acid transmembrane transporter/ cationic amino acid transmembrane transporter	Unigene1060_All//1.00E-72//TC146944			GO:0005275//GO:0015837//GO:0031224//GO:0043231	nr +
Unigene10600_All	453	0	0.1119	0	0.5498	0.152	0.2991	0.0933	0.2768	2.1107	6.8061	0.62197		null	null		-1.8548	0.27558		-0.8783	0.6168		1.5689	0.54622		4.4997	6.8093e-06	Up			Unigene10600_All//4.00E-29//TC170757				ESTscan +
Unigene106005_All	224	201.342	86.4095	212.287	26.2414	32.2831	13.9119	0.9438	0.5598	1.245	-1.2204	3.048e-45	Down	0.0764	0.39614		0.2989	0.19971		-0.9155	0.00014104		-0.7536	0.63259		0.3996	0.74318				Unigene106005_All//3.00E-87//gi|164293551|gb|ES810014.1|ES810014
Unigene106024_All	226	0	0	0	0	0.3047	2.9976	0	0.1849	1.7628	null	null		null	null		8.2512	0.61577		11.5496	0.0004186	Up	7.5306	0.63828		10.7837	0.0039673
Unigene10603_All	428	0.2445	2.2493	0	0.3492	1.4482	0.1055	0.1976	0	0	3.2016	0.00065497	Up	-7.9337	0.39897		2.0521	0.051272		-1.7268	0.50231		-7.6264	0.40729		-7.6264	0.36136		Unigene10603_All//gi|300507129|gb|ADK23940.1|//4.00E-29//KASII [Gossypium hirsutum]		Unigene10603_All//2.00E-12//gi|48829336|gb|CO127726.1|CO127726		ko00061|Fatty acid biosynthesis	GO:0008152//GO:0016747	nr +
Unigene106036_All	226	0	0	0.7069	0	0	4.3964	0.5612	0.3699	0	null	null		9.4654	0.23987		null	null		12.1021	6.1472e-06	Up	-0.6014	0.76766		-9.1324	0.20083		Unigene106036_All//gi|302128114|dbj|BAJ13478.1|//5.00E-28//actin 1 [Guillardia theta]	Unigene106036_All//2.00E-28//AT3G18780| ACT2 (ACTIN 2); structural constituent of cytoskeleton	Unigene106036_All//1.00E-27//gi|31406833|gb|CD485868.1|CD485868		ko04145|Phagosome		nr -
Unigene10605_All	530	0	0	0	0	0	0	2.3932	4.0219	0.0752	null	null		null	null		null	null		null	null		0.7489	0.057763		-4.9921	3.1328e-08	Down	Unigene10605_All//gi|195624710|gb|ACG34185.1|//7.00E-69//60S ribosomal protein L10-3 [Zea mays]	Unigene10605_All//1.00E-68//AT1G14320| SAC52 (SUPPRESSOR OF ACAULIS 52); structural constituent of ribosome	Unigene10605_All//2.00E-13//ES822876		ko03010|Ribosome	GO:0005198//GO:0010467//GO:0030529	nr -
Unigene10606_All	525	0	2.0268	0.8114	0.1898	0.4591	1.1183	1.5301	1.1942	3.5665	10.985	3.8155e-06	Up	9.6643	0.013854		1.2743	0.53221		2.5588	0.028728		-0.3576	0.64859		1.2209	0.0036789				Unigene10606_All//3.00E-70//gi|78339929|gb|DT560203.1|DT560203
Unigene106066_All	228	0.9179	0.2222	0.4671	0.2185	0.151	0.5943	2.5962	0	1.2231	-2.0465	0.33397		-0.9746	0.62164		-0.5331	0.82856		1.4436	0.63955		-11.3422	0.00023964	Down	-1.0859	0.18622				Unigene106066_All//7.00E-119//TC175066
Unigene106097_All	230	0.2275	3.9654	0	0.6498	1.1977	0.7855	0.5515	0.1817	0.3464	4.1235	0.00023364	Up	-7.8297	0.63312		0.8822	0.59523		0.2736	0.90564		-1.6018	0.53546		-0.6709	0.72094		Unigene106097_All//gi|15235982|ref|NP_195678.1|//4.00E-07//SAP domain-containing protein [Arabidopsis thaliana] >gi|145334269|ref|NP_001078515.1| SAP domain-containing protein [Arabidopsis thaliana]	Unigene106097_All//2.00E-08//AT4G39680| SAP domain-containing protein	Unigene106097_All//3.00E-115//TC177371				nr -
Unigene106112_All	231	0.453	3.2902	1.6136	0.8626	1.7888	0.9776	91.8816	11.5798	15.0042	2.8606	0.0055141		1.8327	0.21291		1.0522	0.42598		0.1806	0.93559		-2.9882	4.6721e-85	Down	-2.6144	3.3497e-76	Down			Unigene106112_All//1.00E-114//gi|164365935|gb|ES812563.1|ES812563
Unigene106120_All	231	0	0	0	0	0	3.5192	0	0	0	null	null		null	null		null	null		11.781	6.9549e-05	Up	null	null		null	null		Unigene106120_All//gi|160898912|ref|YP_001564494.1|//8.00E-06//CsbD family protein [Delftia acidovorans SPH-1] >gi|160364496|gb|ABX36109.1| CsbD family protein [Delftia acidovorans SPH-1]						nr -
Unigene10614_All	203	92.2702	40.9349	72.6613	60.8568	76.6736	41.6037	2.0828	0.6177	0.785	-1.1725	4.4212e-18	Down	-0.3447	0.01084		0.3333	0.017781		-0.5487	0.00049643		-1.7535	0.12372		-1.4078	0.17373		Unigene10614_All//gi|228481103|gb|ACQ42250.1|//2.00E-29//blue light photoreceptor [Fragaria x ananassa]	Unigene10614_All//2.00E-27//AT3G45780| PHOT1 (PHOTOTROPIN 1); FMN binding / blue light photoreceptor/ kinase/ protein binding / protein serine/threonine kinase	Unigene10614_All//3.00E-111//TC143876			GO:0004673//GO:0004674//GO:0005515//GO:0006351//GO:0006468//GO:0009416//GO:0009606//GO:0009881//GO:0009902//GO:0010118//GO:0010360//GO:0015992//GO:0023060//GO:0032559//GO:0043231//GO:0044459	nr +
Unigene106146_All	232	252.132	104.178	167.783	57.544	90.3926	46.5261	0	0.3603	0	-1.2751	1.3183e-62	Down	-0.5876	1.0688e-16		0.6515	5.4357e-09		-0.3066	0.0564		8.4931	0.40356		null	null				Unigene106146_All//2.00E-128//TC141493
Unigene106152_All	233	0.2246	0.6524	4.7994	3.6345	3.8426	2.5198	0.1815	1.6144	0.6839	1.5384	0.53211		4.4174	3.5091e-05	Up	0.0803	0.94079		-0.5284	0.50258		3.153	0.03413		1.9138	0.37781				Unigene106152_All//8.00E-57//ES821800
Unigene106165_All	233	6.7366	98.2944	11.1985	7.4828	7.8329	21.9033	72.9469	208.261	60.6983	3.867	1.6295e-93	Up	0.7332	0.074194		0.066	0.91047		1.5495	2.7365e-08	Up	1.5135	4.0596e-82	Up	-0.2652	0.028015		Unigene106165_All//gi|225426282|ref|XP_002266388.1|//8.00E-16//PREDICTED: similar to B2 protein [Vitis vinifera]	Unigene106165_All//4.00E-13//AT3G27090| FUNCTIONS IN: molecular_function unknown; INVOLVED IN: biological_process unknown; LOCATED IN: cellular_component unknown; EXPRESSED IN: 24 plant structures; EXPRESSED DURING: 15 growth stages; CONTAINS InterPro DOMAIN/s: Development and cell death domain (InterPro:IPR013989), Kelch related (InterPro:IPR013089); BEST Arabidopsis thaliana protein match is: u…	Unigene106165_All//5.00E-89//DR461377				nr +
Unigene10617_All	574	1.185	0.1765	0	0.0868	0.4199	0.1574	2.5781	1.0194	1.0411	-2.7471	0.010571		-10.2107	0.00076466	Down	2.2743	0.30545		0.8587	0.79679		-1.3386	0.0074802		-1.3082	0.0065719		Unigene10617_All//gi|124359380|gb|ABN05846.1|//4.00E-06//Tetratricopeptide-like helical [Medicago truncatula]		Unigene10617_All//2.00E-13//TC136777				nr -
Unigene106174_All	234	107.548	221.733	175.679	92.8162	144.952	102.679	51.1337	66.9803	64.3547	1.0438	2.1789e-40	Up	0.708	2.2692e-16		0.6431	6.0509e-14		0.1457	0.25723		0.3895	0.0021287		0.3318	0.009078		Unigene106174_All//gi|151368154|gb|ABS10812.1|//2.00E-23//DNA binding protein-like protein [Gossypium arboreum]		Unigene106174_All//7.00E-125//TC132469				nr +
Unigene106178_All	234	0.2236	1.2992	1.8205	1.703	13.0972	8.8783	1.6262	0.1786	0.3405	2.5386	0.15109		3.0253	0.057361		2.9431	1.9961e-11	Up	2.3822	4.5475e-06	Up	-3.1867	0.031225		-2.2558	0.065041
Unigene106195_All	235	0.2226	3.6654	1.133	0.212	0.2931	0.9609	0.1799	1.0671	1.1867	4.0414	0.00042005	Up	2.3476	0.23971		0.4673	0.96131		2.1803	0.32322		2.5684	0.15311		2.7217	0.099482				Unigene106195_All//2.00E-36//TC157213
Unigene106196_All	235	34.7321	8.1934	15.8617	61.2609	31.6512	24.984	4.4979	1.4228	2.2038	-2.0837	3.8308e-18	Down	-1.1307	1.6825e-07	Down	-0.9527	3.658e-12		-1.294	1.7953e-17	Down	-1.6605	0.00855		-1.0293	0.07297				Unigene106196_All//1.00E-86//TC153940				ESTscan +
Unigene106228_All	237	0	1.9242	0.4494	1.0509	1.0171	3.4301	2.676	8.2886	5.7152	10.91	0.007444		8.8119	0.40228		-0.0472	0.95169		1.7066	0.045737		1.6311	0.00019741	Up	1.0947	0.029464				Unigene106228_All//2.00E-131//TC164875
Unigene106270_All	239	14.4484	6.1482	31.8609	82.5373	131.546	52.7221	78.3687	11.5419	45.8394	-1.2327	0.00030011	Down	1.1409	3.756e-07	Up	0.6724	5.622e-14		-0.6466	7.8861e-08		-2.7634	2.708e-69	Down	-0.7737	8.4495e-12		Unigene106270_All//gi|50313462|gb|AAT74601.1|//4.00E-23//cyclopropane fatty acid synthase [Gossypium hirsutum]	Unigene106270_All//7.00E-17//AT3G23510| cyclopropane fatty acid synthase, putative / CPA-FA synthase, putative	Unigene106270_All//3.00E-78//TC129560				nr +
Unigene10628_All	273	0.3833	0	0	2.3721	0.1261	1.9852	0.6195	0.6124	0.4378	-8.5823	0.37675		-8.5823	0.39884		-4.2335	0.00059434	Down	-0.2569	0.75704		-0.0166	1.0219		-0.5008	0.74718		Unigene10628_All//gi|186898205|gb|ACC93947.1|//6.00E-44//heat-shock protein 70 [Hevea brasiliensis]	Unigene10628_All//5.00E-27//AT3G12580| HSP70 (heat shock protein 70); ATP binding	Unigene10628_All//7.00E-67//TC165936		ko03040|Spliceosome//ko04141|Protein processing in endoplasmic reticulum//ko04144|Endocytosis	GO:0000302//GO:0009642//GO:0010038//GO:0016020//GO:0016628//GO:0019899//GO:0030312//GO:0032446//GO:0032559//GO:0043231//GO:0051707	nr +
Unigene106295_All	241	0	0	0	0.8268	0	0.7496	0	0.6937	2.9755	null	null		null	null		-9.6914	0.0848		-0.1414	0.93549		9.4382	0.13924		11.5389	2.6287e-05	Up	Unigene106295_All//gi|255587535|ref|XP_002534305.1|//2.00E-07//conserved hypothetical protein [Ricinus communis] >gi|223525538|gb|EEF28080.1| conserved hypothetical protein [Ricinus communis]		Unigene106295_All//1.00E-126//gi|109889377|gb|DW518345.1|DW518345				nr -
Unigene1063_All	1193	8.552	17.2013	12.6764	12.6101	15.9909	15.0671	8.1513	12.262	11.5876	1.0082	1.4833e-15	Up	0.5678	0.00013204		0.3427	0.0054406		0.2568	0.064138		0.5891	6.1035e-06		0.5075	0.00011228		Unigene1063_All//gi|42572315|ref|NP_974253.1|//8.00E-68//HhH-GPD base excision DNA repair family protein [Arabidopsis thaliana] >gi|114050633|gb|ABI49466.1| At3g07930 [Arabidopsis thaliana]	Unigene1063_All//4.00E-69//AT3G07930| HhH-GPD base excision DNA repair family protein	Unigene1063_All//0.00E+00//TC169474		ko03410|Base excision repair	GO:0006281	nr +
Unigene106308_All	242	33.7275	13.6096	14.9628	64.8408	64.4594	79.1292	357.809	147.494	194.584	-1.3093	9.8071e-10	Down	-1.1725	6.5949e-08	Down	-0.0085	0.95389		0.2873	0.028088		-1.2785	2.3897e-113	Down	-0.8788	1.4752e-63		Unigene106308_All//gi|78191410|gb|ABB29926.1|//1.00E-35//fructose-bisphosphate aldolase-like [Solanum tuberosum]	Unigene106308_All//2.00E-34//AT5G03690| fructose-bisphosphate aldolase, putative	Unigene106308_All//2.00E-134//gi|11201622|gb|BF270531.1|BF270531		ko00010|Glycolysis / Gluconeogenesis//ko00710|Carbon fixation in photosynthetic organisms//ko00051|Fructose and mannose metabolism//ko00030|Pentose phosphate pathway		nr -
Unigene106326_All	243	0.2153	0	1.3148	0.205	1.1337	10.0363	0.348	1.548	0.6558	-7.7502	0.62021		2.6104	0.14595		2.4673	0.22342		5.6135	3.3812e-13	Up	2.1532	0.094572		0.9142	0.62521				Unigene106326_All//3.00E-07//TC168359
Unigene10633_All	592	0	0	0	0	0	0	2.1426	12.8494	0.3365	null	null		null	null		null	null		null	null		2.5843	1.8156e-26	Up	-2.6707	2.307e-05	Down	Unigene10633_All//gi|38640722|gb|AAR25996.1|//5.00E-06//cytochrome P450 monooxygenase [Pyrus communis]		Unigene10633_All//1.00E-36//gi|73864682|gb|DT467421.1|DT467421				nr -
Unigene106358_All	246	0.8507	2.4717	1.0823	0.405	0.8399	0.3672	0.6875	0.3398	5.1823	1.5388	0.12198		0.3474	0.79711		1.0523	0.61289		-0.1414	0.95287		-1.0167	0.61536		2.9142	1.0456e-05	Up	Unigene106358_All//gi|55168340|gb|AAV44205.1|//3.00E-06//unknow protein [Oryza sativa Japonica Group]		Unigene106358_All//1.00E-31//TC139311				nr -
Unigene10636_All	345	0	0.7343	0.6174	1.2995	0.1996	0.5236	1.5932	0	2.7714	9.5202	0.078862		9.2701	0.14188		-2.7028	0.032442		-1.3114	0.27289		-10.6377	0.00046196	Down	0.7987	0.19536				Unigene10636_All//3.00E-128//TC179309
Unigene106360_All	246	0	0.6179	0	2.835	0	2.3867	0.1719	0.3398	0.1619	9.2712	0.23654		null	null		-11.4691	3.4425e-05	Down	-0.2483	0.75628		0.9831	0.73287		-0.0865	0.97371
Unigene10637_All	420	0	2.5335	1.775	0	0	0	0	0	0	11.3069	3.8152e-06	Up	10.7936	0.00032792	Up	null	null		null	null		null	null		null	null								ESTscan +
Unigene106378_All	247	0.4237	640.65	459.2	0.4034	0	2.5599	0.3423	0.1692	0	10.5623	0	Up	10.0819	0	Up	-8.6561	0.31718		2.6658	0.018264		-1.0165	0.7264		-8.4191	0.3613
Unigene1064_All	1263	1.0356	2.8484	1.307	2.4454	2.8355	2.0025	0.8704	1.3568	2.7127	1.4597	2.0957e-05	Up	0.3358	0.53484		0.2135	0.57551		-0.2883	0.46789		0.6405	0.15734		1.64	2.0286e-07	Up	Unigene1064_All//gi|42572313|ref|NP_974252.1|//2.00E-28//HhH-GPD base excision DNA repair family protein [Arabidopsis thaliana]	Unigene1064_All//1.00E-29//AT3G07930| HhH-GPD base excision DNA repair family protein	Unigene1064_All//0.00E+00//TC169474		ko03410|Base excision repair		nr -
Unigene10641_All	774	0	0	0	0.5149	0.9788	0.4085	0.3278	3.294	0.8235	null	null		null	null		0.9267	0.29678		-0.334	0.75661		3.329	8.6027e-12	Up	1.329	0.10034		Unigene10641_All//gi|18404500|ref|NP_566763.1|//2.00E-65//auxin-responsive family protein [Arabidopsis thaliana] >gi|79313415|ref|NP_001030764.1| auxin-responsive family protein [Arabidopsis thaliana] >gi|16323200|gb|AAL15334.1| AT3g25290/MJL12_25 [Arabidopsis thaliana] >gi|25090093|gb|AAN72226.1| At3g25290/MJL12_25 [Arabidopsis thaliana]	Unigene10641_All//3.00E-63//AT3G25290| auxin-responsive family protein	Unigene10641_All//3.00E-62//gi|78325030|gb|DT545304.1|DT545304			GO:0016020	nr +
Unigene106413_All	250	0	0	0	0.9963	0.6887	1.9872	0.8456	3.3437	4.3026	null	null		null	null		-0.5327	0.71298		0.9961	0.39412		1.9834	0.0088773		2.3472	0.0004456	Up	Unigene106413_All//gi|115472687|ref|NP_001059942.1|//9.00E-28//Os07g0551300 [Oryza sativa Japonica Group] >gi|113611478|dbj|BAF21856.1| Os07g0551300 [Oryza sativa Japonica Group]	Unigene106413_All//7.00E-28//AT4G21390| B120; ATP binding / protein kinase/ protein serine/threonine kinase/ sugar binding	Unigene106413_All//5.00E-12//DT469086		ko04626|Plant-pathogen interaction		nr +
Unigene10642_All	482	0	0.3154	0	0	0	0	1.7544	4.7692	0.9092	8.301	0.23654		null	null		null	null		null	null		1.4428	0.00023166	Up	-0.9483	0.14722		Unigene10642_All//gi|7267528|emb|CAB78010.1|//2.00E-06//receptor protein kinase-like protein [Arabidopsis thaliana] >gi|7321074|emb|CAB82121.1| receptor protein kinase-like protein [Arabidopsis thaliana]	Unigene10642_All//1.00E-07//AT4G08850| kinase				GO:0004672//GO:0005488	nr -
Unigene10643_All	411	1.7822	0	0.3887	1.3332	0.5865	0	0	0.3051	0	-10.7994	0.00021117	Down	-2.1969	0.027698		-1.1847	0.22477		-10.3807	0.0015198		8.2531	0.24103		null	null		Unigene10643_All//gi|225456658|ref|XP_002271524.1|//7.00E-07//PREDICTED: hypothetical protein [Vitis vinifera]		Unigene10643_All//1.00E-07//TC144614				nr -
Unigene106448_All	253	16.5441	8.2113	27.1512	3.1503	1.7694	1.9636	0.1671	0	0.1575	-1.0106	0.00075142	Down	0.7147	0.0021196		-0.8322	0.28806		-0.682	0.40524		-7.3846	0.66295		-0.0854	0.97365		Unigene106448_All//gi|159895667|gb|ABX10444.1|//5.00E-14//phosphoethanolamine N-methyltransferase [Gossypium hirsutum]	Unigene106448_All//1.00E-12//AT1G48600| phosphoethanolamine N-methyltransferase 2, putative (NMT2)	Unigene106448_All//1.00E-52//TC162345		ko00564|Glycerophospholipid metabolism		nr -
Unigene10645_All	308	0	2.7967	2.5933	0	0	0	0	0	0	11.4495	4.9488e-05	Up	11.3406	0.00017245	Up	null	null		null	null		null	null		null	null		Unigene10645_All//sp|Q8VHX6|FLNC_MOUSE//9.00E-31//Filamin-C OS=Mus musculus GN=Flnc PE=1 SV=3						swissprot -
Unigene106472_All	255	0	2.9806	0.6265	0.586	1.3504	3.0109	0.3316	0	0	11.5414	0.00017671	Up	9.2912	0.23982		1.2044	0.42606		2.3612	0.013374		-8.3733	0.40715		-8.3733	0.36125
Unigene106474_All	255	13.5419	4.9676	14.8265	51.1817	42.4027	44.2778	117.39	79.0021	58.43	-1.4468	3.4058e-05	Down	0.1307	0.69046		-0.2715	0.088738		-0.209	0.23224		-0.5713	9.5278e-11		-1.0065	4.2622e-28	Down	Unigene106474_All//gi|297611781|ref|NP_001067845.2|//1.00E-30//Os11g0455500 [Oryza sativa Japonica Group] >gi|255680068|dbj|BAF28208.2| Os11g0455500 [Oryza sativa Japonica Group]	Unigene106474_All//2.00E-28//AT4G13940| MEE58 (MATERNAL EFFECT EMBRYO ARREST 58); adenosylhomocysteinase/ copper ion binding	Unigene106474_All//1.00E-101//gi|164369275|gb|EV484110.1|EV484110		ko00270|Cysteine and methionine metabolism//ko00450|Selenoamino acid metabolism		nr -
Unigene10652_All	435	0	3.378	2.4483	0	0	0	0	0	0	11.722	2.1122e-08	Up	11.2576	6.6275e-06	Up	null	null		null	null		null	null		null	null		Unigene10652_All//gi|300260006|gb|EFJ44228.1|//2.00E-14//RWP-RK domain-containing transcription factor [Volvox carteri f. nagariensis]					GO:0005488//GO:0017111//GO:0044464	nr +
Unigene106520_All	262	0	0.7736	0	0	0.1314	2.7581	0	0	0	9.5954	0.13733		null	null		7.0378	0.83903		11.4295	0.000231	Up	null	null		null	null		Unigene106520_All//gi|15218349|ref|NP_177355.1|//3.00E-09//late embryogenesis abundant domain-containing protein / LEA domain-containing protein [Arabidopsis thaliana]						nr -
Unigene106525_All	262	0	42.1601	1.626	0	0	0.5171	0	0.1595	0	15.3636	2.5188e-63	Up	10.6671	0.013852		null	null		9.0143	0.3123		7.3174	0.63812		null	null		Unigene106525_All//gi|187610416|gb|ACD13462.1|//1.00E-23//raffionse synthase 3 [Glycine max]	Unigene106525_All//1.00E-19//AT5G40390| SIP1 (seed imbibition 1-like); galactinol-sucrose galactosyltransferase/ hydrolase, hydrolyzing O-glycosyl compounds			ko00052|Galactose metabolism		nr +
Unigene106530_All	263	6.9628	0.3853	3.2395	8.9022	6.0229	5.8386	0	0	0	-4.1756	2.1762e-08	Down	-1.1039	0.030611		-0.5637	0.1685		-0.6085	0.15513		null	null		null	null
Unigene106539_All	263	0.7958	5.7798	2.2272	3.9776	3.928	3.4345	0	0	0.4544	2.8605	2.6863e-05	Up	1.4848	0.15337		-0.0181	0.96085		-0.2118	0.74432		null	null		8.8278	0.24354
Unigene106542_All	264	105.236	85.4087	137.966	10.0006	4.8262	1.3686	0.6406	0.3166	0	-0.3012	0.0039717		0.3907	2.0082e-05		-1.0511	0.0040353		-2.8693	2.0421e-09	Down	-1.0168	0.61534		-9.3233	0.10893				Unigene106542_All//4.00E-133//TC140158
Unigene106544_All	264	0	0	0	0	0.7826	0.8554	0.4805	0.9499	4.5271	null	null		null	null		9.6121	0.15739		9.7405	0.11894		0.9832	0.51783		3.236	7.2877e-06	Up
Unigene106548_All	264	0	0	0.2017	0	0.6522	2.5661	0	0.1583	0	null	null		7.6561	0.64112		9.3492	0.2276		11.3254	0.00041857	Up	7.3065	0.6381		null	null		Unigene106548_All//gi|207693265|gb|ACI25287.1|//4.00E-20//ARM repeat containing protein [Populus trichocarpa]	Unigene106548_All//1.00E-20//AT5G66200| ARO2 (ARMADILLO REPEAT ONLY 2); binding	Unigene106548_All//3.00E-140//EX165874				nr -
Unigene106560_All	267	0.3919	3.0364	0.7978	0	0.6449	5.582	0.6334	0	0	2.9538	0.0032865		1.0255	0.59241		9.3329	0.22759		12.4466	7.0368e-09	Up	-9.307	0.13525		-9.307	0.10893		Unigene106560_All//gi|297811437|ref|XP_002873602.1|//4.00E-17//nodulin MtN3 family protein [Arabidopsis lyrata subsp. lyrata] >gi|297319439|gb|EFH49861.1| nodulin MtN3 family protein [Arabidopsis lyrata subsp. lyrata]	Unigene106560_All//4.00E-18//AT5G13170| SAG29 (SENESCENCE-ASSOCIATED PROTEIN 29)	Unigene106560_All//1.00E-129//TC176027				nr +
Unigene106569_All	269	0	0.3767	0.5939	0	0.256	3.0221	0.1572	0.1554	0	8.5573	0.39054		9.2141	0.23981		8	0.61553		11.5613	6.9543e-05	Up	-0.0166	1.0063		-7.2965	0.61729		Unigene106569_All//gi|15218927|ref|NP_176191.1|//9.00E-18//ALA3 (Aminophospholipid ATPase3); ATPase, coupled to transmembrane movement of ions, phosphorylative mechanism / phospholipid transporter [Arabidopsis thaliana] >gi|30316321|sp|Q9XIE6.2|ALA3_ARATH RecName: Full=Phospholipid-transporting ATPase 3; Short=AtALA3; AltName: Full=Aminophospholipid flippase 3 >gi|20147219|gb|AAM10325.1| At1g5982…	Unigene106569_All//4.00E-19//AT1G59820| ALA3 (Aminophospholipid ATPase3); ATPase, coupled to transmembrane movement of ions, phosphorylative mechanism / phospholipid transporter					nr -
Unigene106570_All	269	94.5276	30.138	45.3318	161.85	141.709	162.185	106.879	44.2817	53.908	-1.6492	2.9432e-40	Down	-1.0602	6.5711e-20	Down	-0.1917	0.018212		0.003	0.97274		-1.2712	8.1986e-38	Down	-0.9874	3.3154e-26				Unigene106570_All//7.00E-113//TC134569
Unigene106571_All	269	0.1945	0.3767	1.5836	2.9629	0	3.0221	1.1002	0	0.2962	0.9536	0.72766		3.0254	0.057359		-11.5328	6.4926e-06	Down	0.0285	0.97103		-10.1036	0.021861		-1.8931	0.16818		Unigene106571_All//gi|255578137|ref|XP_002529938.1|//3.00E-07//conserved hypothetical protein [Ricinus communis] >gi|223530568|gb|EEF32446.1| conserved hypothetical protein [Ricinus communis]		Unigene106571_All//5.00E-89//EX164741				nr -
Unigene106575_All	270	1.9378	0.7507	1.775	1.2915	2.1681	2.8436	4.8544	2.0124	1.328	-1.3681	0.1967		-0.1266	0.89836		0.7474	0.4815		1.1387	0.18922		-1.2704	0.017739		-1.87	0.00069322	Down			Unigene106575_All//5.00E-151//TC174841
Unigene10658_All	785	0	1.0328	0	0	1.316	0.863	0	0.0532	0	10.0123	9.3872e-05	Up	null	null		10.3619	2.3534e-06	Up	9.7532	0.00041853	Up	5.7334	0.63807		null	null		Unigene10658_All//gi|6686397|gb|AAF23831.1|AC007234_3//1.00E-20//F1E22.12 [Arabidopsis thaliana]	Unigene10658_All//3.00E-10//AT3G25270| nucleic acid binding				GO:0005488	nr -
Unigene106580_All	270	0.3876	0	0.3944	0.738	1.5305	5.8545	1.2527	0.774	0.8853	-8.5984	0.37663		0.0251	1.0018		1.0523	0.42595		2.9879	7.3053e-06	Up	-0.6946	0.57794		-0.5008	0.64953				Unigene106580_All//4.00E-68//ES801598
Unigene106586_All	271	626.499	436.954	625.245	247.417	214.998	120.658	427.95	291.953	286.074	-0.5198	1.8813e-39		-0.0029	0.97303		-0.2026	0.0010308		-1.036	8.6475e-56	Down	-0.5517	6.8542e-37		-0.5811	1.5089e-41		Unigene106586_All//gi|148807173|gb|ABR13296.1|//9.00E-07//unknown protein [Prunus dulcis]		Unigene106586_All//5.00E-83//TC144875				nr -
Unigene106593_All	272	1.1541	2.7943	5.4816	4.7617	4.9374	4.9813	0.7772	0.3073	1.9041	1.2757	0.12845		2.2478	0.00054889	Up	0.0523	0.9569		0.065	0.93352		-1.3386	0.43062		1.2928	0.15868
Unigene106597_All	272	0.5771	4.4708	2.1535	5.6774	3.4182	4.6492	2.1762	2.7659	2.6364	2.9536	0.00017546	Up	1.8998	0.084776		-0.732	0.15905		-0.2882	0.63831		0.3459	0.62002		0.2768	0.69006				Unigene106597_All//2.00E-70//gi|13246583|gb|BE054988.2|BE054988
Unigene106598_All	272	766.923	355.99	626.275	96.6982	91.4054	56.1221	0.4663	0.1537	0.2929	-1.1072	2.9349e-177	Down	-0.2923	2.3902e-16		-0.0812	0.55229		-0.7849	4.1518e-14		-1.6011	0.5354		-0.6709	0.72085		Unigene106598_All//gi|56122690|gb|AAV74408.1|//4.00E-47//chloroplast chlorophyll A/B binding protein [Manihot esculenta]	Unigene106598_All//8.00E-46//AT2G05070| LHCB2.2; chlorophyll binding	Unigene106598_All//3.00E-152//TC135194		ko00196|Photosynthesis - antenna proteins		nr -
Unigene1066_All	819	13.6072	14.5389	21.0009	15.0233	15.6409	17.3705	43.2094	24.2915	19.0681	0.0955	0.59132		0.6261	5.7598e-06		0.0581	0.79831		0.2094	0.20898		-0.8309	1.7641e-23		-1.1802	1.5275e-42	Down	Unigene1066_All//gi|295687233|gb|ADG27842.1|//1.00E-126//transaldolase [Gossypium hirsutum]	Unigene1066_All//4.00E-71//AT1G12230| transaldolase, putative	Unigene1066_All//0.00E+00//TC142315		ko00030|Pentose phosphate pathway	GO:0009536//GO:0016744//GO:0044238//GO:0046914	nr -
Unigene106600_All	272	0.1924	15.8342	1.1746	0.3663	0.1266	0.6642	0.3109	0	0	6.3628	6.385e-23	Up	2.61	0.14594		-1.5327	0.58853		0.8586	0.69617		-8.2803	0.40709		-8.2803	0.36123		Unigene106600_All//gi|62420870|tpg|DAA01542.1|//5.00E-30//TPA: TPA_exp: alpha-dioxygenase 3 [Lycopersicon esculentum]	Unigene106600_All//5.00E-28//AT1G73680| pathogen-responsive alpha-dioxygenase, putative	Unigene106600_All//2.00E-125//TC167331		ko00592|alpha-Linolenic acid metabolism		nr -
Unigene106603_All	273	0.3833	0.3712	0.1951	0.1825	1.0091	3.1432	0.9292	0.6124	0.1459	-0.0463	0.9908		-0.9743	0.72208		2.4671	0.22341		4.1063	0.00034054	Up	-0.6015	0.64834		-2.671	0.11526		Unigene106603_All//gi|224062025|ref|XP_002300717.1|//8.00E-41//SAUR family protein [Populus trichocarpa] >gi|222842443|gb|EEE79990.1| SAUR family protein [Populus trichocarpa]	Unigene106603_All//1.00E-39//AT1G75580| auxin-responsive protein, putative	Unigene106603_All//7.00E-141//TC157705				nr +
Unigene106609_All	273	11.8824	0	0.3901	11.4956	2.6489	1.6543	4.0267	1.531	5.1075	-13.5365	9.7251e-19	Down	-4.9288	3.8783e-15	Down	-2.1176	4.7459e-09	Down	-2.7968	7.9341e-11	Down	-1.3951	0.020388		0.343	0.50302		Unigene106609_All//gi|224115708|ref|XP_002317102.1|//7.00E-10//predicted protein [Populus trichocarpa] >gi|222860167|gb|EEE97714.1| predicted protein [Populus trichocarpa]		Unigene106609_All//4.00E-133//ES815751				nr +
Unigene10661_All	478	0.7662	0.318	0.8912	4.377	2.6655	1.0393	1.2383	0.6995	2.0003	-1.2687	0.33587		0.218	0.83092		-0.7155	0.096324		-2.0743	2.1119e-05	Down	-0.824	0.34837		0.6919	0.26043		Unigene10661_All//gi|224073274|ref|XP_002304055.1|//1.00E-30//cc-nbs-lrr resistance protein [Populus trichocarpa] >gi|222841487|gb|EEE79034.1| cc-nbs-lrr resistance protein [Populus trichocarpa]	Unigene10661_All//6.00E-18//AT3G14470| disease resistance protein (NBS-LRR class), putative	Unigene10661_All//2.00E-161//gi|109863388|gb|DW492365.1|DW492365		ko04626|Plant-pathogen interaction	GO:0005488//GO:0009987	nr +
Unigene10662_All	882	2.8474	0.2298	1.5094	0.3389	0.2343	0.2048	0	0	0	-3.6312	2.7514e-10	Down	-0.9157	0.029101		-0.5325	0.67904		-0.7266	0.63926		null	null		null	null		Unigene10662_All//gi|224127726|ref|XP_002329162.1|//5.00E-15//tir-nbs-lrr resistance protein [Populus trichocarpa] >gi|222870943|gb|EEF08074.1| tir-nbs-lrr resistance protein [Populus trichocarpa]	Unigene10662_All//4.00E-05//AT4G19530| disease resistance protein (TIR-NBS-LRR class), putative	Unigene10662_All//6.00E-73//TC178046			GO:0005488	nr +
Unigene106629_All	277	3.3999	0	0	0.3597	0.6216	0.8152	0.4579	0.7544	1.4382	-11.7313	1.462e-05	Down	-11.7313	3.3463e-05	Down	0.7892	0.7717		1.1804	0.5499		0.7203	0.63241		1.6512	0.14053		Unigene106629_All//gi|195621024|gb|ACG32342.1|//5.00E-18//histone mRNA exonuclease 1 [Zea mays]	Unigene106629_All//1.00E-17//AT3G15140| exonuclease family protein	Unigene106629_All//2.00E-110//TC143702				nr +
Unigene10663_All	746	0	0	0	0	0	0	1.757	2.4091	0.1068	null	null		null	null		null	null		null	null		0.4554	0.31984		-4.0401	1.3476e-07	Down	Unigene10663_All//gi|80973464|gb|ABB53473.1|//5.00E-86//GDP-mannose pyrophosphorylase [Malpighia glabra] >gi|161898831|gb|ABX80393.1| GDP-mannose pyrophosphorylase [Malpighia glabra]	Unigene10663_All//9.00E-86//AT2G39770| CYT1 (CYTOKINESIS DEFECTIVE 1); mannose-1-phosphate guanylyltransferase/ nucleotidyltransferase			ko00520|Amino sugar and nucleotide sugar metabolism//ko00051|Fructose and mannose metabolism	GO:0008152//GO:0008905//GO:0043231	nr -
Unigene10664_All	693	0	0	0	0	0	0	25.6854	2.3521	0.5174	null	null		null	null		null	null		null	null		-3.4489	1.0471e-81	Down	-5.6335	6.8741e-116	Down	Unigene10664_All//gi|226501140|ref|NP_001152197.1|//9.00E-11//LOC100285835 [Zea mays] >gi|195653721|gb|ACG46328.1| keratin-associated protein 5-4 [Zea mays]	Unigene10664_All//2.00E-07//AT5G05660| ATNFXL2; protein binding / transcription factor/ zinc ion binding			ko00230|Purine metabolism//ko00240|Pyrimidine metabolism//ko00520|Amino sugar and nucleotide sugar metabolism//ko03020|RNA polymerase		nr +
Unigene10665_All	267	0	0	0.1994	4.6643	4.1271	1.0149	0.9501	26.455	1.1937	null	null		7.6395	0.6411		-0.1765	0.79536		-2.2003	0.0011039		4.7993	3.9303e-41	Up	0.3293	0.76375				Unigene10665_All//2.00E-45//gi|13244098|gb|BE053719.2|BE053719
Unigene106654_All	283	0.1849	0.3581	2.0698	0	0	10.2136	0	0	0	0.9536	0.72765		3.4847	0.012072		null	null		13.3182	2.4399e-17	Up	null	null		null	null		Unigene106654_All//sp|Q9U8M0|VIT1_PERAM//1.00E-07//Vitellogenin-1 OS=Periplaneta americana GN=VG2 PE=2 SV=1						swissprot +
Unigene10666_All	441	0	0.1149	0	0.113	0.3123	1.1265	1.7257	0.4739	0	6.8442	0.62181		null	null		1.4666	0.61978		3.3175	0.023147		-1.8645	0.018231		-10.753	8.8885e-06	Down
Unigene106662_All	284	0	0	0	0	0.1213	2.5444	0.5955	0.2943	0.5611	null	null		null	null		6.9224	0.83898		11.3131	0.00023098	Up	-1.0168	0.61531		-0.0858	0.96629		Unigene106662_All//gi|15237835|ref|NP_200728.1|//4.00E-36//pentatricopeptide (PPR) repeat-containing protein [Arabidopsis thaliana]	Unigene106662_All//2.00E-37//AT5G59200| pentatricopeptide (PPR) repeat-containing protein					nr -
Unigene10667_All	287	0	0	0	0	0	0	2.0624	2.9126	0	null	null		null	null		null	null		null	null		0.498	0.48607		-11.0101	0.00014165	Down	Unigene10667_All//gi|159462882|ref|XP_001689671.1|//3.00E-06//polyadenylate-binding protein RB47 [Chlamydomonas reinhardtii] >gi|158283659|gb|EDP09409.1| polyadenylate-binding protein RB47 [Chlamydomonas reinhardtii]					GO:0005488	nr -
Unigene106672_All	287	1.2761	2.1186	3.1542	5.3806	2.5197	41.2293	50.2353	20.0969	20.9604	0.7314	0.41635		1.3055	0.097688		-1.0945	0.031146		2.9378	1.4185e-40	Up	-1.3217	1.6278e-20	Down	-1.261	9.9002e-20	Down			Unigene106672_All//3.00E-44//gi|78334472|gb|DT554746.1|DT554746
Unigene106673_All	288	0.3633	0.3519	0	0.3459	2.0326	3.45	0.5872	0	0.83	-0.046	0.99078		-8.505	0.39868		2.5549	0.02843		3.3182	0.00034682	Up	-9.1977	0.13523		0.4993	0.70787		Unigene106673_All//gi|297836510|ref|XP_002886137.1|//4.00E-34//FAT domain-containing protein [Arabidopsis lyrata subsp. lyrata] >gi|297331977|gb|EFH62396.1| FAT domain-containing protein [Arabidopsis lyrata subsp. lyrata]	Unigene106673_All//1.00E-34//AT2G17930| binding / inositol or phosphatidylinositol kinase/ phosphotransferase, alcohol group as acceptor					nr -
Unigene106695_All	292	0	0	2.5531	0.3412	0.2359	1.392	0.4344	0.4294	0.5457	null	null		11.318	0.0003279	Up	-0.5324	0.81913		2.0285	0.14934		-0.0167	1.0194		0.3291	0.85178		Unigene106695_All//gi|225442485|ref|XP_002278313.1|//1.00E-44//PREDICTED: similar to PDR8/PEN3 (PLEIOTROPIC DRUG RESISTANCE8); ATPase, coupled to transmembrane movement of substances / cadmium ion transmembrane transporter [Vitis vinifera]	Unigene106695_All//4.00E-45//AT1G59870| PEN3 (PENETRATION 3); ATPase, coupled to transmembrane movement of substances / cadmium ion transmembrane transporter	Unigene106695_All//8.00E-08//gi|78354132|gb|DT574406.1|DT574406		ko02010|ABC transporters		nr -
Unigene10670_All	252	2.0762	11.662	5.494	5.5349	4.3727	6.4519	20.3012	15.0929	10.9082	2.4898	2.1098e-08	Up	1.4039	0.022804		-0.34	0.56162		0.2212	0.67713		-0.4277	0.078391		-0.8962	0.00010153				Unigene10670_All//1.00E-61//TC140097
Unigene106701_All	294	252.528	294.365	287.441	142.326	97.8009	53.1515	0.2876	0.5686	0.271	0.2212	8.9996e-05		0.1868	0.0019479		-0.5413	5.1464e-13		-1.421	1.9934e-57	Down	0.9834	0.6346		-0.0858	0.9736				Unigene106701_All//1.00E-148//TC144944
Unigene10671_All	346	0	0	0	0.5759	0	0.2611	4.5213	1.0872	2.1877	null	null		null	null		-9.1697	0.084793		-1.1412	0.5699		-2.0561	9.4369e-05	Down	-1.0473	0.021733				Unigene10671_All//8.00E-24//DT464488
Unigene10673_All	337	0.621	1.0525	0	2.0694	3.6785	2.8143	1.8819	0	0	0.7612	0.55703		-9.2784	0.14662		0.8299	0.18812		0.4436	0.57403		-10.878	0.00012354	Down	-10.878	7.1253e-05	Down	Unigene10673_All//gi|27476088|gb|AAO17019.1|//2.00E-10//Hypothetical protein [Oryza sativa Japonica Group]	Unigene10673_All//3.00E-10//AT2G22610| kinesin motor protein-related				GO:0000166//GO:0003774	nr +
Unigene106734_All	305	2.0585	0	1.2221	0.6533	0.7903	0.7404	0.1386	0.2741	0.2612	-11.0074	0.00079209	Down	-0.7522	0.41146		0.2747	0.89536		0.1806	0.93548		0.9838	0.73279		0.9142	0.75129				Unigene106734_All//3.00E-07//DR462295
Unigene106746_All	309	0.508	0.328	0.517	0	0.4458	0.7308	6.431	0.4058	1.4182	-0.6311	0.72832		0.0253	1.0029		8.8003	0.32008		9.5133	0.11892		-3.9862	1.0897e-10	Down	-2.181	1.7499e-06	Down	Unigene106746_All//gi|84688912|gb|ABC61505.1|//4.00E-16//AGO4-2 [Nicotiana benthamiana]	Unigene106746_All//2.00E-12//AT5G21150| PAZ domain-containing protein / piwi domain-containing protein	Unigene106746_All//8.00E-70//gi|48807247|gb|CO108561.1|CO108561				nr -
Unigene106764_All	315	0	0.3217	0	0.3163	2.8423	1.7205	0	0	0	8.3296	0.39049		null	null		3.1677	0.00087779	Up	2.4435	0.044135		null	null		null	null			Unigene106764_All//8.00E-05//AT4G10265| wound-responsive protein, putative	Unigene106764_All//1.00E-105//gi|109876598|gb|DW505572.1|DW505572
Unigene106767_All	317	1.4854	0.7992	0.336	0.1571	1.6294	2.8494	0.6669	0.6592	1.1311	-0.8942	0.38865		-2.1443	0.10345		3.3746	0.018227		4.1809	0.00019519	Up	-0.0168	1.0232		0.7622	0.49963		Unigene106767_All//gi|15228991|ref|NP_191228.1|//2.00E-17//CIP111 (CAM INTERACTING PROTEIN 111); ATPase/ calmodulin binding [Arabidopsis thaliana] >gi|9662988|emb|CAC00732.1| calmodulin-binding protein [Arabidopsis thaliana]	Unigene106767_All//8.00E-19//AT3G56690| CIP111 (CAM INTERACTING PROTEIN 111); ATPase/ calmodulin binding					nr -
Unigene106777_All	327	0	0	0	0	0.6318	2.7623	1.8102	0.7669	1.9493	null	null		null	null		9.3033	0.15737		11.4317	2.0702e-05	Up	-1.239	0.15439		0.1068	0.90158		Unigene106777_All//gi|42565171|ref|NP_189132.2|//2.00E-17//DNA binding [Arabidopsis thaliana]	Unigene106777_All//8.00E-19//AT3G24880| DNA binding					nr +
Unigene10678_All	647	0	0.0783	0	0.6929	0.1597	0.4188	0	0	2.894	6.2909	0.62179		null	null		-2.1173	0.072809		-0.7264	0.53254		null	null		11.4988	1.9544e-13	Up	Unigene10678_All//gi|87240526|gb|ABD32384.1|//7.00E-28//Peptidase A1, pepsin [Medicago truncatula]	Unigene10678_All//1.00E-16//AT1G03220| extracellular dermal glycoprotein, putative / EDGP, putative	Unigene10678_All//1.00E-135//TC176754			GO:0005618//GO:0006970//GO:0016020	nr -
Unigene10679_All	270	1.5502	3.378	7.1	20.2947	15.4321	17.7308	5.794	3.7152	3.9839	1.1237	0.12999		2.1954	8.2081e-05	Up	-0.3952	0.12318		-0.1948	0.50138		-0.6411	0.18187		-0.5404	0.2404		Unigene10679_All//gi|147802546|emb|CAN77665.1|//4.00E-06//hypothetical protein [Vitis vinifera]		Unigene10679_All//2.00E-61//ES823904				nr +
Unigene106796_All	342	0	0.4445	0	0	0	3.4335	0	0	0	8.796	0.23653		null	null		null	null		11.7455	5.3249e-07	Up	null	null		null	null								ESTscan +
Unigene106799_All	346	0	0	0	0	0	3.1327	0	0	0	null	null		null	null		null	null		11.6132	1.8157e-06	Up	null	null		null	null		Unigene106799_All//gi|30696750|ref|NP_176463.2|//2.00E-07//invertase/pectin methylesterase inhibitor family protein [Arabidopsis thaliana] >gi|6630459|gb|AAF19547.1|AC007190_15 F23N19.12 [Arabidopsis thaliana]				ko00230|Purine metabolism//ko00240|Pyrimidine metabolism//ko03020|RNA polymerase		nr -
Unigene10680_All	319	0	0	0	0	0	0	0	4.0617	1.2489	null	null		null	null		null	null		null	null		11.9879	3.6685e-09	Up	10.2864	0.0039671
Unigene106801_All	346	0	1.7573	1.2312	0.5759	0.2986	7.7013	0.1222	0	0.4606	10.7791	0.0011704		10.2658	0.01385		-0.9476	0.58821		3.7412	1.5599e-11	Up	-6.9331	0.66282		1.9143	0.37774		Unigene106801_All//gi|297807543|ref|XP_002871655.1|//5.00E-22//amino acid transporter family protein [Arabidopsis lyrata subsp. lyrata] >gi|297317492|gb|EFH47914.1| amino acid transporter family protein [Arabidopsis lyrata subsp. lyrata]	Unigene106801_All//9.00E-23//AT5G15240| amino acid transporter family protein	Unigene106801_All//5.00E-167//gi|48826851|gb|CO125241.1|CO125241				nr +
Unigene106810_All	358	7901.32	3489.26	7207.19	190.63	308.86	168.669	0	0.2335	0	-1.1792	0	Down	-0.1327	3.494e-47		0.6962	2.5444e-51		-0.1766	0.0069094		7.8673	0.40341		null	null		Unigene106810_All//gi|12620881|gb|AAG61120.1|//1.00E-65//ribulose-1,5-bisphosphate carboxylase/oxygenase activase 1 [Gossypium hirsutum]	Unigene106810_All//3.00E-54//AT2G39730| RCA (RUBISCO ACTIVASE); ADP binding / ATP binding / enzyme regulator/ ribulose-1,5-bisphosphate carboxylase/oxygenase activator	Unigene106810_All//0.00E+00//EX168151				nr +
Unigene106812_All	362	0	2.2395	0	0	0.5708	2.62	0.8176	0.3464	0.9905	11.129	9.3867e-05	Up	null	null		9.1568	0.15737		11.3554	1.1292e-05	Up	-1.239	0.3734		0.2768	0.78755		Unigene106812_All//gi|225465575|ref|XP_002263953.1|//5.00E-08//PREDICTED: hypothetical protein [Vitis vinifera] >gi|147865101|emb|CAN79390.1| hypothetical protein [Vitis vinifera]				ko03040|Spliceosome		nr -
Unigene10682_All	491	0	0	0	0	0	0	3.1	2.2132	0	null	null		null	null		null	null		null	null		-0.4861	0.33454		-11.5981	2.8844e-11	Down	Unigene10682_All//gi|15241051|ref|NP_198129.1|//2.00E-37//60S ribosomal protein L22 (RPL22C) [Arabidopsis thaliana] >gi|17865557|sp|Q9FE58.1|RL223_ARATH RecName: Full=60S ribosomal protein L22-3 >gi|11692938|gb|AAG40072.1|AF324721_1 T1G16 [Arabidopsis thaliana] >gi|21554057|gb|AAM63138.1| 60S ribosomal protein L22-like [Arabidopsis thaliana] >gi|27808502|gb|AAO24531.1| At5g27770 [Arabidopsis thal…	Unigene10682_All//1.00E-25//AT5G27770| 60S ribosomal protein L22 (RPL22C)			ko03010|Ribosome	GO:0005198//GO:0010467//GO:0015934//GO:0016020//GO:0031981	nr +
Unigene106820_All	371	0	0	0	0	0	0.3652	8.6612	0.7886	1.0738	null	null		null	null		null	null		8.5125	0.31227		-3.4572	3.0894e-15	Down	-3.0118	5.3209e-14	Down	Unigene106820_All//gi|1743354|emb|CAA71003.1|//6.00E-35//aldehyde dehydrogenase (NAD+) [Nicotiana tabacum]	Unigene106820_All//3.00E-34//AT3G48000| ALDH2B4 (ALDEHYDE DEHYDROGENASE 2B4); 3-chloroallyl aldehyde dehydrogenase/ ATP binding / aldehyde dehydrogenase (NAD)	Unigene106820_All//4.00E-35//EG702325		ko00940|Phenylpropanoid biosynthesis//ko00010|Glycolysis / Gluconeogenesis//ko00903|Limonene and pinene degradation//ko00620|Pyruvate metabolism//ko00380|Tryptophan metabolism//ko00071|Fatty acid metabolism//ko00053|Ascorbate and aldarate metabolism//ko00330|Arginine and proline metabolism//ko00280|Valine, leucine and isoleucine degradation//ko00640|Propanoate metabolism//ko00561|Glycerolipid met…		nr -
Unigene106829_All	377	2.2205	11.5585	3.6724	25.1053	65.491	38.934	0.785	2.6607	3.8042	2.38	1.4732e-11	Up	0.7258	0.2282		1.3833	3.1063e-35	Up	0.633	9.3031e-06		1.761	0.0076673		2.2768	4.9396e-05	Up	Unigene106829_All//gi|15241290|ref|NP_197519.1|//3.00E-23//binding [Arabidopsis thaliana]	Unigene106829_All//1.00E-24//AT5G20190| binding	Unigene106829_All//5.00E-84//TC165464				nr -
Unigene106832_All	387	0.1352	0	0	0	0	2.4507	0	0	0.1029	-7.079	0.61992		-7.079	0.6327		null	null		11.259	1.1291e-05	Up	null	null		6.6851	0.64762		Unigene106832_All//gi|5231127|gb|AAD41083.1|AF151961_1//5.00E-61//1-aminocyclopropane-1-carboxylic acid synthase [Vigna radiata]	Unigene106832_All//9.00E-55//AT3G49700| ACS9 (1-AMINOCYCLOPROPANE-1-CARBOXYLATE SYNTHASE 9); 1-aminocyclopropane-1-carboxylate synthase			ko00270|Cysteine and methionine metabolism		nr +
Unigene106834_All	388	0	0.5224	0	0.5135	1.3313	3.9576	0.4359	0.3232	0	9.029	0.13731		null	null		1.3744	0.22643		2.9462	1.2171e-05	Up	-0.4316	0.79384		-8.7679	0.10892		Unigene106834_All//gi|3121837|sp|O04940.1|CDS1_SOLTU//1.00E-53//RecName: Full=Phosphatidate cytidylyltransferase; AltName: Full=CDP-diglyceride pyrophosphorylase; AltName: Full=CDP-diglyceride synthase; AltName: Full=CDP-diacylglycerol synthase; Short=CDS; AltName: Full=CTP:phosphatidate cytidylyltransferase; AltName: Full=CDP-DG synthase; AltName: Full=CDP-DAG synthase >gi|2182104|emb|CAA63004.1…	Unigene106834_All//7.00E-50//AT4G22340| phosphatidate cytidylyltransferase, putative / CDP-diglyceride synthetase, putative	Unigene106834_All//1.00E-103//CO498072		ko04070|Phosphatidylinositol signaling system//ko00564|Glycerophospholipid metabolism		nr -
Unigene106836_All	389	0.807	0	1.0951	0.3842	1.6819	3.2508	0	0.1074	0.1024	-9.6564	0.036661		0.4404	0.67728		2.1302	0.03782		3.0809	6.5545e-05	Up	6.7469	0.63799		6.6781	0.64761
Unigene106838_All	395	0	1.6676	0	1.0089	0.959	2.9728	1.4985	1.3756	0.8069	10.7036	0.00062596	Up	null	null		-0.0732	0.9256		1.559	0.019457		-0.1235	0.88416		-0.8931	0.27157				Unigene106838_All//5.00E-07//TC140528
Unigene10684_All	500	0	0	0	0	0	0	1.8603	2.8421	0.1594	null	null		null	null		null	null		null	null		0.6114	0.23572		-3.5448	3.9732e-05	Down	Unigene10684_All//gi|145353927|ref|XP_001421249.1|//1.00E-07//predicted protein [Ostreococcus lucimarinus CCE9901] >gi|145354001|ref|XP_001421285.1| predicted protein [Ostreococcus lucimarinus CCE9901] >gi|144581486|gb|ABO99542.1| predicted protein [Ostreococcus lucimarinus CCE9901] >gi|144581522|gb|ABO99578.1| predicted protein [Ostreococcus lucimarinus CCE9901]						nr +
Unigene106841_All	398	1.8404	0	0.1338	0.3755	0.6056	0.5674	0.6374	0	0.2002	-10.8458	0.00021116	Down	-3.7819	0.0027931		0.6896	0.73248		0.5956	0.72176		-9.3161	0.040621		-1.6708	0.25683		Unigene106841_All//gi|52789958|gb|AAU87582.1|//7.00E-60//MADS9 protein [Gossypium hirsutum]	Unigene106841_All//6.00E-14//AT5G13790| AGL15 (AGAMOUS-LIKE 15); DNA binding / transcription factor	Unigene106841_All//2.00E-154//TC129654	MADS			nr -
Unigene106842_All	398	0	0	0.2676	0	0	10.8937	0	0	0	null	null		8.0639	0.4021		null	null		13.4112	3.6668e-26	Up	null	null		null	null		Unigene106842_All//sp|Q16927|VIT1_AEDAE//2.00E-17//Vitellogenin-A1 OS=Aedes aegypti GN=VGA1 PE=1 SV=2						swissprot -
Unigene106844_All	406	0.5155	0.4992	0.5246	0.1227	0.5937	2.8922	1.1455	0.2059	1.57	-0.0464	0.98898		0.0252	1.0037		2.2746	0.30541		4.559	6.4147e-06	Up	-2.476	0.033844		0.4548	0.57819		Unigene106844_All//gi|297841629|ref|XP_002888696.1|//4.00E-38//prolyl oligopeptidase family protein [Arabidopsis lyrata subsp. lyrata] >gi|297334537|gb|EFH64955.1| prolyl oligopeptidase family protein [Arabidopsis lyrata subsp. lyrata]	Unigene106844_All//4.00E-37//AT1G69020| prolyl oligopeptidase family protein					nr -
Unigene106847_All	411	0	0	0	0.1212	0.3351	2.0878	0.5144	0.7118	0.2908	null	null		null	null		1.4672	0.61976		4.1065	0.00034052	Up	0.4686	0.7066		-0.8229	0.59972		Unigene106847_All//gi|115488208|ref|NP_001066591.1|//1.00E-10//Os12g0288000 [Oryza sativa Japonica Group] >gi|77554969|gb|ABA97765.1| Integral membrane protein DUF6 containing protein, expressed [Oryza sativa (japonica cultivar-group)] >gi|113649098|dbj|BAF29610.1| Os12g0288000 [Oryza sativa Japonica Group]	Unigene106847_All//3.00E-08//AT5G64700| nodulin MtN21 family protein	Unigene106847_All//2.00E-34//TC144438				nr -
Unigene106850_All	418	2.3782	2007.38	1212.27	0.3575	0.3295	10.1564	0.5057	0.2	0.0953	9.7212	0	Up	8.9936	0	Up	-0.1177	0.91146		4.8283	1.9141e-21	Up	-1.3383	0.4306		-2.4077	0.19523				Unigene106850_All//9.00E-21//TC149074
Unigene106851_All	421	0.7457	0	0	0	0	7.9385	0	0.0993	0.2839	-9.5425	0.03666		-9.5425	0.049304		null	null		12.9547	4.3301e-20	Up	6.6337	0.63798		8.1492	0.24351		Unigene106851_All//gi|224127212|ref|XP_002320015.1|//8.00E-59//1-aminocyclopropane-1-carboxylate [Populus trichocarpa] >gi|222860788|gb|EEE98330.1| 1-aminocyclopropane-1-carboxylate [Populus trichocarpa]	Unigene106851_All//2.00E-57//AT5G65800| ACS5 (ACC SYNTHASE 5); 1-aminocyclopropane-1-carboxylate synthase			ko00270|Cysteine and methionine metabolism		nr -
Unigene106852_All	422	0.9919	0.4803	3.9117	0.3541	0.5712	0.4281	0	0	0	-1.0463	0.36584		1.9795	0.00080564	Up	0.6898	0.73247		0.2738	0.90556		null	null		null	null		Unigene106852_All//gi|291506702|gb|ADE08783.1|//1.00E-29//phytochrome interacting factor 4 [Arabidopsis thaliana] >gi|291506704|gb|ADE08784.1| phytochrome interacting factor 4 [Arabidopsis thaliana] >gi|291506706|gb|ADE08785.1| phytochrome interacting factor 4 [Arabidopsis thaliana] >gi|291506708|gb|ADE08786.1| phytochrome interacting factor 4 [Arabidopsis thaliana] >gi|291506710|gb|ADE08787.1| p…	Unigene106852_All//8.00E-29//AT2G43010| PIF4 (phytochrome interacting factor 4); DNA binding / protein binding / transcription factor	Unigene106852_All//5.00E-10//TC178874	bHLH	ko04626|Plant-pathogen interaction//ko04712|Circadian rhythm - plant		nr -
Unigene106856_All	432	0	0.2346	0.4931	0.9225	1.9131	5.8545	0	0	0	7.8741	0.39046		8.9457	0.14183		1.0523	0.19919		2.6659	3.6461e-08	Up	null	null		null	null		Unigene106856_All//gi|297850352|ref|XP_002893057.1|//1.00E-33//S-adenosyl-L-methionine:jasmonic acid carboxyl methyltransferase [Arabidopsis lyrata subsp. lyrata] >gi|297338899|gb|EFH69316.1| S-adenosyl-L-methionine:jasmonic acid carboxyl methyltransferase [Arabidopsis lyrata subsp. lyrata]	Unigene106856_All//1.00E-33//AT1G19640| JMT (JASMONIC ACID CARBOXYL METHYLTRANSFERASE); jasmonate O-methyltransferase			ko00592|alpha-Linolenic acid metabolism		nr +
Unigene106857_All	434	0	0.2335	0.7362	0.6887	0	4.1625	0.1948	0.2889	0	7.8673	0.39046		9.524	0.045373		-9.4277	0.020191		2.5955	7.991e-06	Up	0.5686	0.78304		-7.6058	0.36118		Unigene106857_All//gi|21536895|gb|AAM61227.1|//3.00E-64//amino acid transport protein AAP2 [Arabidopsis thaliana]	Unigene106857_All//2.00E-65//AT5G09220| AAP2 (AMINO ACID PERMEASE 2); amino acid transmembrane transporter	Unigene106857_All//0.00E+00//gi|48814445|gb|CO115758.1|CO115758				nr -
Unigene106865_All	460	2.2748	0.9914	0.2315	0.6498	0.9732	3.7309	0	0.3634	0.0866	-1.1982	0.077599		-3.2967	0.00045869	Down	0.5827	0.62627		2.5215	2.0892e-05	Up	8.5054	0.13922		6.4363	0.6476
Unigene106868_All	472	0	1.825	0.4513	1.2665	0.8025	0.2871	0.0896	0.2657	0.5064	10.8337	4.9485e-05	Up	8.8179	0.14182		-0.6583	0.47819		-2.1412	0.043931		1.5682	0.54613		2.4987	0.1591				Unigene106868_All//0.00E+00//gi|164288680|gb|ES800533.1|ES800533				ESTscan -
Unigene106869_All	492	0.4254	5.8702	2.0564	0.2025	0.9099	4.3144	0.1719	0.3398	0.3239	3.7865	5.5318e-12	Up	2.2732	0.0057661		2.1678	0.10644		4.4132	2.7299e-10	Up	0.9831	0.63457		0.914	0.62516		Unigene106869_All//gi|292668975|gb|ADE41142.1|//6.00E-42//AP2 domain class transcription factor [Malus x domestica]	Unigene106869_All//3.00E-24//AT5G11590| TINY2 (TINY2); DNA binding / transcription factor	Unigene106869_All//0.00E+00//TC178420	AP2-EREBP			nr +
Unigene10687_All	465	0	3.9228	3.779	0	0	0	0	0	0	11.9377	2.1434e-10	Up	11.8838	1.1204e-09	Up	null	null		null	null		null	null		null	null		Unigene10687_All//gi|15021748|gb|AAK77901.1|AF397029_1//3.00E-15//root nodule extensin [Pisum sativum]				ko03040|Spliceosome//ko04144|Endocytosis		nr +
Unigene106870_All	507	0	0	0	0	0	1.7816	0	0	0	null	null		null	null		null	null		10.799	2.07e-05	Up	null	null		null	null
Unigene106871_All	507	0	0	0	0	0.2717	3.8304	0	0	0	null	null		null	null		8.0859	0.32007		11.9033	1.3645e-11	Up	null	null		null	null		Unigene106871_All//sp|P08171|EST6_DROME//9.00E-09//Esterase-6 OS=Drosophila melanogaster GN=Est-6 PE=1 SV=2						swissprot +
Unigene106875_All	543	0.2891	0.0933	0	0.2752	0.0634	3.4101	0.1557	0.2309	0.1467	-1.6316	0.48906		-8.1754	0.24621		-2.1179	0.38741		3.6313	6.0586e-08	Up	0.5685	0.78303		-0.0859	0.97354		Unigene106875_All//gi|224053975|ref|XP_002298066.1|//1.00E-38//AP2/ERF domain-containing transcription factor [Populus trichocarpa] >gi|222845324|gb|EEE82871.1| AP2/ERF domain-containing transcription factor [Populus trichocarpa]	Unigene106875_All//2.00E-26//AT1G12630| DNA binding / transcription activator/ transcription factor	Unigene106875_All//8.00E-130//TC163291	AP2-EREBP			nr -
Unigene106876_All	573	0	0.1769	0	0	0.1202	7.0937	0	0	0	7.4668	0.39044		null	null		6.9093	0.61543		12.7923	1.6754e-24	Up	null	null		null	null		Unigene106876_All//sp|Q05808|VIT_ANTGR//3.00E-31//Vitellogenin OS=Anthonomus grandis GN=VTG PE=4 SV=1						swissprot +
Unigene106877_All	600	0.1744	1.3512	0.6212	0.6642	1.8939	3.7636	0	0	0	2.9538	0.0032864		1.8327	0.21288		1.5117	0.023628		2.5024	6.8421e-07	Up	null	null		null	null		Unigene106877_All//gi|87241322|gb|ABD33180.1|//5.00E-29//TGF-beta receptor, type I/II extracellular region [Medicago truncatula]	Unigene106877_All//1.00E-27//AT1G33440| proton-dependent oligopeptide transport (POT) family protein	Unigene106877_All//0.00E+00//CO119167				nr +
Unigene106882_All	446	0	0	0	0	0	0	21.2349	1.312	1.0719	null	null		null	null		null	null		null	null		-4.0166	2.4206e-49	Down	-4.3082	1.3596e-53	Down
Unigene106883_All	232	0	0	1.8362	0.2147	0	0	3.2804	2.1618	8.5859	null	null		10.8425	0.013849		-7.7462	0.56385		-7.7462	0.64541		-0.6016	0.41185		1.3881	0.00076989	Up	Unigene106883_All//gi|15219445|ref|NP_178085.1|//7.00E-20//RFO1 (RESISTANCE TO FUSARIUM OXYSPORUM 1); kinase [Arabidopsis thaliana] >gi|75247675|sp|Q8RY17.1|WAKLI_ARATH RecName: Full=Wall-associated receptor kinase-like 22; Flags: Precursor >gi|19310447|gb|AAL84959.1| At1g79670/F20B17_27 [Arabidopsis thaliana]	Unigene106883_All//3.00E-21//AT1G79670| RFO1 (RESISTANCE TO FUSARIUM OXYSPORUM 1); kinase	Unigene106883_All//1.00E-43//DT462731		ko04626|Plant-pathogen interaction		nr -
Unigene106884_All	641	0	0	0	0	0	0	2.8363	0.7172	0.4351	null	null		null	null		null	null		null	null		-1.9836	3.3919e-05	Down	-2.7046	1.8634e-07	Down	Unigene106884_All//gi|157011451|gb|ABV00887.1|//1.00E-100//actin [Rhodomonas sp. CCMP768]	Unigene106884_All//2.00E-97//AT3G53750| ACT3 (actin 3); structural constituent of cytoskeleton	Unigene106884_All//4.00E-33//gi|5045286|gb|AI726434.1|AI726434				nr -
Unigene106886_All	379	0	0	0	0	0	0	1.7849	0	0	null	null		null	null		null	null		null	null		-10.8016	6.3459e-05	Down	-10.8016	3.5694e-05	Down	Unigene106886_All//gi|253998300|ref|YP_003050363.1|//1.00E-08//cold-shock DNA-binding domain protein [Methylovorus sp. SIP3-4] >gi|253984979|gb|ACT49836.1| cold-shock DNA-binding domain protein [Methylovorus sp. SIP3-4]	Unigene106886_All//4.00E-07//AT4G36020| CSDP1 (cold shock domain protein 1); RNA binding / double-stranded DNA binding / nucleic acid binding / single-stranded DNA binding		CSD			nr +
Unigene106887_All	292	0	0	0	0	0	0	2.7511	1.002	0	null	null		null	null		null	null		null	null		-1.4571	0.046527		-11.4258	4.4338e-06	Down
Unigene106888_All	595	0	0	0	0	0	0	5.1163	0.562	0.2009	null	null		null	null		null	null		null	null		-3.1865	1.7001e-13	Down	-4.6706	1.912e-18	Down	Unigene106888_All//gi|300266840|gb|EFJ51026.1|//8.00E-46//component of cytosolic 80S ribosome and 40S small subunit [Volvox carteri f. nagariensis]	Unigene106888_All//5.00E-41//AT3G02560| 40S ribosomal protein S7 (RPS7B)			ko03010|Ribosome		nr -
Unigene10689_All	443	1.8897	1.1438	0.4808	1.2369	0.6219	1.6312	2.5769	0.3774	1.0792	-0.7243	0.34802		-1.9746	0.027099		-0.992	0.31297		0.3992	0.65157		-2.7715	7.6236e-05	Down	-1.2557	0.024243
Unigene106890_All	485	0	0	0	0	0	0	2.4409	0.1724	0	null	null		null	null		null	null		null	null		-3.8236	2.1198e-06	Down	-11.2532	8.1512e-09	Down
Unigene106892_All	430	0	0	0	0	0	0	6.2929	1.0692	0.5559	null	null		null	null		null	null		null	null		-2.5572	9.0261e-10	Down	-3.5008	1.5028e-13	Down							ESTscan -
Unigene106893_All	807	0	0	0	0	0	0	3.4055	0.6733	0.2468	null	null		null	null		null	null		null	null		-2.3385	5.1343e-09	Down	-3.7865	1.3259e-14	Down	Unigene106893_All//gi|300267515|gb|EFJ51698.1|//4.00E-79//ADP/ATP carrier protein, probably mitochondrial [Volvox carteri f. nagariensis]	Unigene106893_All//2.00E-72//AT4G28390| AAC3 (ADP/ATP CARRIER 3); ATP:ADP antiporter/ binding	Unigene106893_All//1.00E-06//EV483520				nr -
Unigene106894_All	268	0	0	0	0	0	0	2.8397	0.3119	0	null	null		null	null		null	null		null	null		-3.1866	0.00079304	Down	-11.4715	8.8881e-06	Down	Unigene106894_All//gi|298709974|emb|CBJ31696.1|//2.00E-27//Ribosomal protein S23, component of cytosolic 80S ribosome and 40S small subunit [Ectocarpus siliculosus]	Unigene106894_All//4.00E-23//AT5G02960| 40S ribosomal protein S23 (RPS23B)	Unigene106894_All//2.00E-20//CD486290		ko03010|Ribosome		nr -
Unigene106896_All	205	0	0	0	0	0	0	3.5062	0.2039	0	null	null		null	null		null	null		null	null		-4.104	0.0002915	Down	-11.7757	1.7831e-05	Down	Unigene106896_All//gi|116059767|emb|CAL55474.1|//6.00E-22//ribosomal protein L18 (ISS) [Ostreococcus tauri]	Unigene106896_All//1.00E-19//AT3G05590| RPL18 (RIBOSOMAL PROTEIN L18); structural constituent of ribosome			ko03010|Ribosome		nr -
Unigene106898_All	399	0	0	0	0	0	0	5.8281	0.2095	0.0998	null	null		null	null		null	null		null	null		-4.798	7.374e-14	Down	-5.8678	1.1284e-15	Down	Unigene106898_All//gi|32400871|gb|AAP80667.1|AF479048_1//5.00E-55//ribosomal Pr 117 [Triticum aestivum]	Unigene106898_All//4.00E-56//AT3G04400| emb2171 (embryo defective 2171); structural constituent of ribosome	Unigene106898_All//5.00E-13//TC156592		ko03010|Ribosome		nr -
Unigene10690_All	593	0	4.5286	1.6164	0	0	0	0	0	0	12.1448	2.8066e-15	Up	10.6586	2.4602e-05	Up	null	null		null	null		null	null		null	null								ESTscan +
Unigene106901_All	269	0	0	0	0	0	0	2.672	0.4661	0	null	null		null	null		null	null		null	null		-2.5192	0.0046941		-11.3837	1.783e-05	Down							ESTscan +
Unigene106902_All	848	0	0	0	0	0.2436	0.0533	11.7667	0.5914	0.5168	null	null		null	null		7.9284	0.15736		5.7361	0.70316		-4.3144	1.3842e-54	Down	-4.509	4.2451e-58	Down	Unigene106902_All//gi|117622276|gb|ABK51384.1|//1.00E-08//IMP dehydrogenase/GMP reductase [Hevea brasiliensis]						nr -
Unigene106903_All	577	0	0	0	0	0	0	3.2974	0.1449	0	null	null		null	null		null	null		null	null		-4.5082	4.7494e-11	Down	-11.6871	4.9129e-14	Down	Unigene106903_All//gi|83582438|emb|CAJ45370.1|//3.00E-65//40S ribosomal protein S5 [Chlamydomonas sp. ICE-L]	Unigene106903_All//3.00E-64//AT2G37270| ATRPS5B (RIBOSOMAL PROTEIN 5B); structural constituent of ribosome			ko03010|Ribosome		nr +
Unigene106904_All	531	0	0	0	0	0	0	3.3442	0.0787	0.075	null	null		null	null		null	null		null	null		-5.4092	2.9708e-11	Down	-5.4786	8.9232e-12	Down							ESTscan -
Unigene106907_All	383	1.0929	2.1167	2.6416	2.9915	2.967	2.0046	2.7598	6.875	2.0803	0.9537	0.22649		1.2733	0.083581		-0.0119	0.96432		-0.5776	0.39839		1.3168	0.0002332	Up	-0.4078	0.48472				Unigene106907_All//2.00E-101//TC162510
Unigene106908_All	505	0	0	0	0	0	0	2.6791	1.5725	0.3944	null	null		null	null		null	null		null	null		-0.7687	0.13909		-2.764	7.5133e-06	Down	Unigene106908_All//gi|34761728|gb|AAQ82037.1|//3.00E-15//gag/pol polyprotein [Pisum sativum]		Unigene106908_All//3.00E-36//FL576545				nr +
Unigene106909_All	693	0	0	0	0	0	0	2.3794	0.2412	0	null	null		null	null		null	null		null	null		-3.3023	8.3052e-08	Down	-11.2164	3.4491e-12	Down							ESTscan -
Unigene106911_All	403	0	0.2515	0	0	0.2563	0.3362	55.814	46.1516	417.663	7.9744	0.39044		null	null		8.0017	0.4583		8.3932	0.31226		-0.2742	0.0097748		2.9036	0	Up	Unigene106911_All//gi|3970689|emb|CAA77191.1|//1.00E-36//(+)-delta-cadinene synthase [Gossypium arboreum]	Unigene106911_All//7.00E-13//AT5G23960| TPS21 (TERPENE SYNTHASE 21); (-)-E-beta-caryophyllene synthase/ alpha-humulene synthase	Unigene106911_All//2.00E-74//gi|84158582|gb|DN827629.1|DN827629		ko00904|Diterpenoid biosynthesis//ko00902|Monoterpenoid biosynthesis		nr -
Unigene106913_All	772	0	0	0	0	0	0	7.2293	0.4331	0.3612	null	null		null	null		null	null		null	null		-4.0611	1.6827e-29	Down	-4.323	7.1442e-32	Down	Unigene106913_All//gi|192910762|gb|ACF06489.1|//5.00E-68//ribosomal protein L10a [Elaeis guineensis]	Unigene106913_All//1.00E-61//AT1G08360| 60S ribosomal protein L10A (RPL10aA)	Unigene106913_All//6.00E-11//CD486329		ko03010|Ribosome		nr +
Unigene106914_All	597	0	0	0	0	0	0	5.0283	0	0.4004	null	null		null	null		null	null		null	null		-12.2959	3.1444e-21	Down	-3.6506	1.8302e-15	Down	Unigene106914_All//gi|298704815|emb|CBJ48963.1|//8.00E-74//Arf1, ARF family GTPase [Ectocarpus siliculosus]	Unigene106914_All//4.00E-72//AT3G62290| ATARFA1E (ADP-ribosylation factor A1E); GTP binding / phospholipase activator/ protein binding	Unigene106914_All//2.00E-41//gi|78322862|gb|DT543136.1|DT543136				nr -
Unigene106925_All	237	0	0	0	0	0	0	2.1408	0	0	null	null		null	null		null	null		null	null		-11.0639	0.00089091	Down	-11.0639	0.00055597	Down
Unigene106929_All	367	0	0	0	0	0	0	2.7649	1.025	0.2171	null	null		null	null		null	null		null	null		-1.4316	0.023557		-3.6708	1.1474e-05	Down
Unigene106932_All	383	0	0.2646	0	0	0	0	1.7663	0.1091	0.208	8.0477	0.39043		null	null		null	null		null	null		-4.017	0.00053637	Down	-3.0861	0.0014515
Unigene106935_All	578	0	0	0	0	0	0	1.975	1.0124	0.0689	null	null		null	null		null	null		null	null		-0.9641	0.093258		-4.8412	2.3398e-07	Down
Unigene106940_All	361	0.5797	0	0	0	0	0	7.2614	1.6209	7.0628	-9.1792	0.12261		-9.1792	0.14661		null	null		null	null		-2.1635	6.4208e-08	Down	-0.04	0.92493
Unigene106943_All	433	0	0.3511	0.3689	1.1504	0.1591	0.2086	2.0505	0.4826	0.184	8.4557	0.23651		8.5271	0.23978		-2.8541	0.017782		-2.4633	0.048333		-2.0871	0.0047063		-3.4782	7.3377e-05	Down
Unigene10695_All	265	0	6.501	3.2151	0	0	0	0	0	0	12.6664	7.9961e-10	Up	11.6506	9.0338e-05	Up	null	null		null	null		null	null		null	null								ESTscan +
Unigene106956_All	400	0	0	0	0	0	0	2.114	0.8359	0.0996	null	null		null	null		null	null		null	null		-1.3386	0.056824		-4.4077	2.3716e-05	Down							ESTscan +
Unigene106957_All	596	0	0	0	0	0	0	2.0573	2.1739	0	null	null		null	null		null	null		null	null		0.0795	0.89011		-11.0065	4.0308e-09	Down	Unigene106957_All//gi|300266545|gb|EFJ50732.1|//9.00E-54//component of cytosolic 80S ribosome and 60S large subunit [Volvox carteri f. nagariensis]	Unigene106957_All//3.00E-42//AT3G05590| RPL18 (RIBOSOMAL PROTEIN L18); structural constituent of ribosome			ko03010|Ribosome		nr +
Unigene106959_All	1475	0	0	0	0	0	0	6.3635	5.4122	0.3511	null	null		null	null		null	null		null	null		-0.2336	0.20304		-4.1799	4.7603e-52	Down	Unigene106959_All//gi|226347409|gb|ACO50115.1|//0.00E+00//elongation factor 1 alpha [Peranema trichophorum]	Unigene106959_All//1.00E-130//AT5G60390| elongation factor 1-alpha / EF-1-alpha	Unigene106959_All//1.00E-72//TC166357				nr -
Unigene10696_All	451	0	0	0	0	0	0	2.8124	2.2242	0.3533	null	null		null	null		null	null		null	null		-0.3385	0.55847		-2.9928	6.3615e-06	Down	Unigene10696_All//gi|167859793|gb|ACA04850.1|//7.00E-14//senescence-associated protein [Picea abies]		Unigene10696_All//4.00E-17//gi|84158108|gb|DN827155.1|DN827155				nr +
Unigene106972_All	270	0	0	0	5.9039	2.1681	1.5054	30.8489	2.4768	23.7556	null	null		null	null		-1.4452	0.0040731		-1.9715	0.00048819	Down	-3.6387	2.7556e-40	Down	-0.377	0.032587				Unigene106972_All//3.00E-47//ES827343
Unigene106979_All	236	0.8868	0.8588	1.3538	2.5329	2.1887	2.8706	12.3616	145.4	21.4386	-0.0463	0.98897		0.6103	0.62488		-0.2107	0.82267		0.1806	0.84468		3.5561	9.9785e-161	Up	0.7943	0.0005983		Unigene106979_All//gi|23978432|dbj|BAC21263.1|//7.00E-28//glutathione S-transferase [Cucurbita maxima]	Unigene106979_All//1.00E-20//AT2G29450| ATGSTU5 (ARABIDOPSIS THALIANA GLUTATHIONE S-TRANSFERASE TAU 5); glutathione binding / glutathione transferase	Unigene106979_All//2.00E-69//gi|62295949|gb|DN779339.1|DN779339		ko00480|Glutathione metabolism	GO:0016765//GO:0016846//GO:0044424	nr +
Unigene106981_All	679	0	0	0	0	0	0	3.3002	0.4309	0.176	null	null		null	null		null	null		null	null		-2.9371	2.1871e-09	Down	-4.2289	6.0227e-13	Down	Unigene106981_All//gi|226500076|ref|NP_001150681.1|//3.00E-17//LOC100284314 [Zea mays] >gi|195641032|gb|ACG39984.1| zinc finger protein hangover [Zea mays]				ko04120|Ubiquitin mediated proteolysis		nr -
Unigene106982_All	799	0	0	0	0	0.1293	0	0.3175	0.68	1.6454	null	null		null	null		7.0146	0.45827		null	null		1.0988	0.23596		2.3736	7.2035e-05	Up	Unigene106982_All//gi|224074393|ref|XP_002304363.1|//5.00E-67//acyl:coa ligase [Populus trichocarpa] >gi|222841795|gb|EEE79342.1| acyl:coa ligase [Populus trichocarpa]	Unigene106982_All//1.00E-39//AT4G19010| 4-coumarate--CoA ligase family protein / 4-coumaroyl-CoA synthase family protein	Unigene106982_All//1.00E-163//gi|13352404|gb|BG442752.1|BG442752		ko00940|Phenylpropanoid biosynthesis//ko00360|Phenylalanine metabolism//ko00592|alpha-Linolenic acid metabolism//ko00130|Ubiquinone and other terpenoid-quinone biosynthesis	GO:0016405	nr -
Unigene106986_All	288	0	0	0	0	0	0	3.3765	0	0	null	null		null	null		null	null		null	null		-11.7213	5.8374e-07	Down	-11.7213	2.7248e-07	Down
Unigene106989_All	288	0	0	0	0	0	0	3.0829	0.4354	0	null	null		null	null		null	null		null	null		-2.8239	0.00056504	Down	-11.5901	1.102e-06	Down	Unigene106989_All//gi|73761683|gb|AAZ83341.1|//3.00E-33//ubiquitin extension protein [Gossypium hirsutum]	Unigene106989_All//6.00E-19//AT3G62250| UBQ5 (ubiquitin 5); protein binding / structural constituent of ribosome	Unigene106989_All//1.00E-09//gi|164316986|gb|EV492026.1|EV492026		ko03010|Ribosome	GO:0005198//GO:0005488//GO:0010467//GO:0015935//GO:0016567//GO:0019941	nr +
Unigene10699_All	274	0.191	9.0613	0.7774	0.1818	0.8797	0.4945	0.3086	0.1525	1.0178	5.5681	9.5016e-13	Up	2.0251	0.36185		2.2747	0.3054		1.4436	0.63947		-1.0169	0.72634		1.7216	0.23028				Unigene10699_All//3.00E-29//CO111688
Unigene1070_All	1487	10.5556	4.9749	8.4871	12.2274	13.9408	15.2164	6.1984	6.9706	14.5745	-1.0853	1.4087e-13	Down	-0.3147	0.037721		0.1892	0.15092		0.3155	0.0068098		0.1694	0.35734		1.2335	5.1985e-28	Up	Unigene1070_All//gi|90399346|emb|CAH68425.1|//2.00E-93//H0811D08.10 [Oryza sativa (indica cultivar-group)]	Unigene1070_All//1.00E-61//AT5G10790| UBP22 (UBIQUITIN-SPECIFIC PROTEASE 22); ubiquitin thiolesterase/ ubiquitin-specific protease/ zinc ion binding	Unigene1070_All//0.00E+00//gi|78338363|gb|DT558637.1|DT558637			GO:0008233//GO:0043231	nr -
Unigene10701_All	477	1.9744	0.2125	0.8931	4.6995	3.754	4.7341	0.1773	0.3505	1.0022	-3.2159	0.00067672	Down	-1.1445	0.13842		-0.3241	0.47666		0.0106	0.98194		0.9832	0.63456		2.4989	0.025173		Unigene10701_All//gi|21322711|emb|CAD22154.1|//2.00E-40//pherophorin-dz1 protein [Volvox carteri f. nagariensis]				ko03040|Spliceosome		nr -
Unigene107016_All	238	0	0	0	0	0	0	2.1318	0	0.3348	null	null		null	null		null	null		null	null		-11.0579	0.00089087	Down	-2.6707	0.013748
Unigene107032_All	390	0	0	0	0	0	0	1.7346	1.1789	0	null	null		null	null		null	null		null	null		-0.5572	0.48917		-10.7604	3.5693e-05	Down	Unigene107032_All//gi|226462262|gb|EEH59554.1|//2.00E-32//60S ribosomal protein L35 [Micromonas pusilla CCMP1545]	Unigene107032_All//3.00E-32//AT5G02610| 60S ribosomal protein L35 (RPL35D)			ko03010|Ribosome	GO:0005198//GO:0010467//GO:0030529	nr -
Unigene10704_All	297	0	0.6824	0	0	0	0.1521	0	1.9702	2.6827	9.4145	0.1373		null	null		null	null		7.2489	0.7031		10.9441	0.00028148	Up	11.3895	7.3628e-06	Up
Unigene107043_All	300	0	0	0	0	0.1148	0	2.6777	0.1393	0	null	null		null	null		6.843	0.83886		null	null		-4.2647	8.4808e-05	Down	-11.3868	4.4336e-06	Down	Unigene107043_All//gi|44917549|gb|AAS49099.1|//2.00E-13//At2g37380 [Arabidopsis thaliana]	Unigene107043_All//2.00E-16//AT2G39370| unknown protein	Unigene107043_All//4.00E-10//TC160952				nr +
Unigene107048_All	552	0	0	0	0	0	0	2.5276	0.0757	0.1443	null	null		null	null		null	null		null	null		-5.0613	1.1002e-08	Down	-4.1306	3.6972e-08	Down
Unigene107050_All	326	0.4815	0.7771	0	0.4584	0.6338	0.8312	2.4642	0	1.0998	0.6906	0.62682		-8.9114	0.24619		0.4674	0.82561		0.8586	0.63139		-11.2669	8.5843e-06	Down	-1.1639	0.088528		Unigene107050_All//gi|297834848|ref|XP_002885306.1|//2.00E-48//kinase family protein [Arabidopsis lyrata subsp. lyrata] >gi|297331146|gb|EFH61565.1| kinase family protein [Arabidopsis lyrata subsp. lyrata]	Unigene107050_All//3.00E-40//AT3G19300| protein kinase family protein	Unigene107050_All//1.00E-179//ES800996		ko04626|Plant-pathogen interaction	GO:0004672//GO:0006464//GO:0016020//GO:0031410//GO:0032559	nr +
Unigene107061_All	257	0	0	0	0	0	0	2.1387	0	0.31	null	null		null	null		null	null		null	null		-11.0625	0.00046194	Down	-2.7864	0.0079676		Unigene107061_All//gi|145345768|ref|XP_001417372.1|//2.00E-20//Ribosomal protein S17, component of cytosolic 80S ribosome and 40S small subunit [Ostreococcus lucimarinus CCE9901] >gi|144577599|gb|ABO95665.1| Ribosomal protein S17, component of cytosolic 80S ribosome and 40S small subunit [Ostreococcus lucimarinus CCE9901]	Unigene107061_All//1.00E-20//AT5G04800| 40S ribosomal protein S17 (RPS17D)			ko03010|Ribosome	GO:0005198//GO:0010467//GO:0030529	nr +
Unigene107064_All	497	0	0	0	0	0	0	2.6372	0	0.0802	null	null		null	null		null	null		null	null		-11.3648	2.5616e-09	Down	-5.0393	1.5966e-08	Down	Unigene107064_All//gi|209967441|gb|ACJ02349.1|//2.00E-21//60S ribosomal protein L35a [Vernicia fordii]	Unigene107064_All//2.00E-20//AT1G41880| 60S ribosomal protein L35a (RPL35aB)			ko03010|Ribosome	GO:0005198//GO:0010467//GO:0015934//GO:0022613	nr +
Unigene107068_All	207	0	0	0	0	0	0	3.0638	0.2019	0	null	null		null	null		null	null		null	null		-3.9236	0.00098136	Down	-11.5811	7.125e-05	Down	Unigene107068_All//gi|126566038|gb|ABO20848.1|//1.00E-07//cytochrome P450-like TBP protein [Lilium longiflorum]		Unigene107068_All//9.00E-07//EV495741				nr -
Unigene10707_All	278	0.3764	0	1.5324	2.867	0.1239	0.1625	0.3042	0	0	-8.5561	0.37643		2.0255	0.13958		-4.5323	6.0584e-05	Down	-4.141	0.00041264	Down	-8.2489	0.40694		-8.2489	0.36113
Unigene107071_All	284	104.642	101.696	87.5625	4.0342	6.7901	10.0186	2.382	0.7358	1.2625	-0.0412	0.70876		-0.2571	0.015663		0.7512	0.11361		1.3123	0.00056079	Up	-1.6948	0.041882		-0.9159	0.22135		Unigene107071_All//gi|55168340|gb|AAV44205.1|//7.00E-10//unknow protein [Oryza sativa Japonica Group]		Unigene107071_All//1.00E-80//TC147077				nr -
Unigene107076_All	499	0	0	0	0	0	0	1.2709	1.9265	0	null	null		null	null		null	null		null	null		0.6001	0.3673		-10.3116	7.1247e-05	Down	Unigene107076_All//gi|212275977|ref|NP_001130697.1|//3.00E-16//hypothetical protein LOC100191800 [Zea mays] >gi|194689862|gb|ACF79015.1| unknown [Zea mays]						nr -
Unigene10708_All	358	17.0993	8.3506	11.8994	22.4025	22.9889	25.8617	5.3145	2.8019	5.6753	-1.034	2.0669e-05	Down	-0.523	0.037943		0.0373	0.87991		0.2072	0.34302		-0.9235	0.028438		0.0948	0.81223				Unigene10708_All//7.00E-15//gi|109890883|gb|DW519846.1|DW519846
Unigene107081_All	352	0	0	0	0	0	0	2.7626	0.5937	0	null	null		null	null		null	null		null	null		-2.2182	0.0018166		-11.4318	2.7246e-07	Down
Unigene107084_All	1125	0	0	0	0	0	0	4.5851	0.0372	0.1062	null	null		null	null		null	null		null	null		-6.9455	9.4608e-35	Down	-5.4321	2.5677e-33	Down	Unigene107084_All//gi|115463079|ref|NP_001055139.1|//2.00E-99//Os05g0302700 [Oryza sativa Japonica Group] >gi|113578690|dbj|BAF17053.1| Os05g0302700 [Oryza sativa Japonica Group]	Unigene107084_All//2.00E-80//AT5G13490| AAC2 (ADP/ATP carrier 2); ATP:ADP antiporter/ binding	Unigene107084_All//4.00E-13//TC167393			GO:0006810//GO:0019866//GO:0031224//GO:0043231	nr -
Unigene107088_All	462	0	0	0	0	0	0	2.1049	0.5428	0	null	null		null	null		null	null		null	null		-1.9553	0.0044402		-11.0395	2.7245e-07	Down							ESTscan -
Unigene107104_All	363	0	0	0	0	0	0	1.9801	0.1151	0	null	null		null	null		null	null		null	null		-4.1046	0.00029149	Down	-10.9514	1.7829e-05	Down	Unigene107104_All//gi|297814842|ref|XP_002875304.1|//2.00E-09//leucine-rich repeat family protein [Arabidopsis lyrata subsp. lyrata] >gi|297321142|gb|EFH51563.1| leucine-rich repeat family protein [Arabidopsis lyrata subsp. lyrata]	Unigene107104_All//2.00E-09//AT5G66330| leucine-rich repeat family protein	Unigene107104_All//8.00E-55//gi|78335416|gb|DT555690.1|DT555690				nr -
Unigene107106_All	237	0	0	0	0.8407	0	0	2.1408	0.7054	0	null	null		null	null		-9.7154	0.084769		-9.7154	0.13435		-1.6016	0.10685		-11.0639	0.00055595	Down	Unigene107106_All//gi|124360490|gb|ABN08500.1|//2.00E-13//Protein kinase [Medicago truncatula]	Unigene107106_All//3.00E-09//AT3G47570| leucine-rich repeat transmembrane protein kinase, putative			ko04626|Plant-pathogen interaction	GO:0004672//GO:0005488	nr -
Unigene107107_All	458	0	0	0	0	0.0752	0.0986	5.1696	0.365	0.3479	null	null		null	null		6.2327	0.83882		6.6235	0.70309		-3.8241	2.7914e-12	Down	-3.8933	6.3988e-13	Down			Unigene107107_All//2.00E-25//gi|195983575|gb|FL577381.1|FL577381
Unigene10711_All	310	3.5443	0	2.2331	0.4821	0.3332	0.5828	0.5456	0.1348	0.514	-11.7913	1.9469e-06	Down	-0.6665	0.33531		-0.5329	0.78584		0.2737	0.90554		-2.017	0.36816		-0.0861	0.96627
Unigene107111_All	553	0	0	0	0.0901	0	0	2.1408	0.907	0.3602	null	null		null	null		-6.4935	0.56373		-6.4935	0.64529		-1.239	0.029278		-2.5713	6.9756e-05	Down			Unigene107111_All//3.00E-21//TC132835
Unigene107113_All	280	0	0	0	0	0	0	2.416	0.1493	0	null	null		null	null		null	null		null	null		-4.0163	0.00053634	Down	-11.2384	3.5691e-05	Down	Unigene107113_All//gi|116222125|gb|ABJ80933.1|//4.00E-38//actin [Leucocryptos marina]	Unigene107113_All//3.00E-33//AT3G12110| ACT11 (actin-11); structural constituent of cytoskeleton	Unigene107113_All//1.00E-15//gi|5049214|gb|AI730362.1|AI730362			GO:0032559//GO:0043232	nr +
Unigene107114_All	272	0	0	0	0	0	0	7.4612	0	0.8788	null	null		null	null		null	null		null	null		-12.8652	2.3226e-14	Down	-3.0858	2.6575e-09	Down	Unigene107114_All//gi|37901017|gb|AAP46148.1|//2.00E-45//actin 2 [Pseudo-nitzschia multiseries] >gi|37935564|gb|AAP46147.1| actin 1 [Pseudo-nitzschia multiseries]	Unigene107114_All//2.00E-43//AT3G12110| ACT11 (actin-11); structural constituent of cytoskeleton	Unigene107114_All//9.00E-20//gi|31406833|gb|CD485868.1|CD485868		ko04145|Phagosome	GO:0000267//GO:0003015//GO:0005198//GO:0005884//GO:0006939//GO:0007015//GO:0008015//GO:0008092//GO:0012501//GO:0017111//GO:0030017//GO:0030239//GO:0032432//GO:0032559//GO:0048747//GO:0051707//GO:0060415	nr -
Unigene10712_All	361	0	4.7722	1.4751	0	0	0	0	0	0	12.2204	7.9954e-10	Up	10.5266	0.0040476		null	null		null	null		null	null		null	null		Unigene10712_All//gi|226530890|ref|NP_001151865.1|//1.00E-44//serine hydroxymethyltransferase [Zea mays] >gi|195650403|gb|ACG44669.1| serine hydroxymethyltransferase [Zea mays]	Unigene10712_All//2.00E-41//AT5G26780| SHM2 (SERINE HYDROXYMETHYLTRANSFERASE 2); catalytic/ glycine hydroxymethyltransferase/ pyridoxal phosphate binding			ko00460|Cyanoamino acid metabolism//ko00260|Glycine, serine and threonine metabolism//ko00670|One carbon pool by folate	GO:0009069//GO:0016742//GO:0043231//GO:0048037	nr -
Unigene107123_All	241	0	0	0	0	0.1429	0	4.035	3.4685	11.5714	null	null		null	null		7.1589	0.8388		null	null		-0.2183	0.72449		1.5199	1.217e-05	Up	Unigene107123_All//gi|15217709|ref|NP_176647.1|//9.00E-30//ATMGL (ARABIDOPSIS THALIANA METHIONINE GAMMA-LYASE); catalytic/ methionine gamma-lyase [Arabidopsis thaliana] >gi|6633821|gb|AAF19680.1|AC009519_14 F1N19.23 [Arabidopsis thaliana] >gi|16226491|gb|AAL16181.1|AF428413_1 At1g64660/F1N19_22 [Arabidopsis thaliana] >gi|15450932|gb|AAK96737.1| similar to O-succinylhomoserine sulfhydrylase [Arabi…	Unigene107123_All//4.00E-31//AT1G64660| ATMGL (ARABIDOPSIS THALIANA METHIONINE GAMMA-LYASE); catalytic/ methionine gamma-lyase	Unigene107123_All//1.00E-49//TC130861		ko00270|Cysteine and methionine metabolism//ko00450|Selenoamino acid metabolism	GO:0009087//GO:0016765//GO:0016846//GO:0044444//GO:0048037	nr -
Unigene107128_All	512	0.6131	0	0.312	4.3782	2.4212	2.8227	6.9366	1.7143	3.7349	-9.26	0.036658		-0.9746	0.50603		-0.8546	0.035816		-0.6333	0.14758		-2.0166	1.2029e-09	Down	-0.8932	0.0015704		Unigene107128_All//gi|302142868|emb|CBI20163.3|//5.00E-09//unnamed protein product [Vitis vinifera]		Unigene107128_All//2.00E-161//CO094931				nr +
Unigene10713_All	299	0.35	1.1862	0.1781	0.4998	1.0365	1.8126	3.2523	7.2688	9.46	1.7609	0.21831		-0.9747	0.72204		1.0523	0.53154		1.8586	0.10253		1.1603	0.0032561		1.5404	8.3443e-06	Up	Unigene10713_All//gi|114199050|gb|ABI54120.1|//4.00E-24//caffeic acid O-methyltransferase [Malus x domestica]	Unigene10713_All//6.00E-24//AT5G54160| ATOMT1 (O-METHYLTRANSFERASE 1); caffeate O-methyltransferase/ myricetin 3'-O-methyltransferase/ quercetin 3-O-methyltransferase	Unigene10713_All//8.00E-36//AI055471		ko00940|Phenylpropanoid biosynthesis//ko00944|Flavone and flavonol biosynthesis	GO:0005515//GO:0008171//GO:0009699	nr +
Unigene107136_All	761	0	0	0	0	0	0	2.0001	2.142	0.1047	null	null		null	null		null	null		null	null		0.0989	0.83581		-4.2557	5.2246e-09	Down	Unigene107136_All//gi|7208784|emb|CAB76914.1|//2.00E-26//60S ribosomal protein L6 [Cicer arietinum]	Unigene107136_All//9.00E-15//AT1G74060| 60S ribosomal protein L6 (RPL6B)			ko03010|Ribosome	GO:0005488//GO:0015934//GO:0016020//GO:0031981	nr +
Unigene107138_All	235	0.4453	0.6468	1.133	0.6359	0.8792	0.1922	2.8787	0.1779	0	0.5385	0.77991		1.3473	0.40946		0.4674	0.8256		-1.7262	0.50227		-4.0163	0.00053632	Down	-11.4912	3.569e-05	Down	Unigene107138_All//gi|105922786|gb|ABF81437.1|//7.00E-08//TIR-NBS-LRR-TIR type disease resistance protein [Populus trichocarpa]	Unigene107138_All//4.00E-05//AT1G27180| disease resistance protein (TIR-NBS-LRR class), putative	Unigene107138_All//9.00E-29//gi|48807031|gb|CO108345.1|CO108345			GO:0000166//GO:0006952//GO:0009987	nr -
Unigene107140_All	387	2.1631	0.6546	0	0.7723	0.5339	1.5171	2.8405	1.08	1.2353	-1.7244	0.036262		-11.0789	0.000119	Down	-0.5326	0.67902		0.9741	0.34638		-1.3951	0.020387		-1.2013	0.034149				Unigene107140_All//3.00E-76//BG440255
Unigene107141_All	255	0	0	0	0	0	0	3.1503	0	0	null	null		null	null		null	null		null	null		-11.6213	8.5838e-06	Down	-11.6213	4.4334e-06	Down
Unigene107156_All	507	0.2064	0.0999	0.6302	0.1965	0.2717	0.3563	2.335	1.4839	0.1572	-1.0469	0.68555		1.6104	0.30507		0.4675	0.87781		0.8586	0.69613		-0.654	0.24688		-3.8927	9.2081e-07	Down
Unigene107158_All	493	0	0	0	0	0	0	4.9741	0.5934	1.6162	null	null		null	null		null	null		null	null		-3.0674	1.263e-10	Down	-1.6218	1.5461e-05	Down
Unigene107159_All	341	0	0	0	0	0	0	2.3558	1.9611	0	null	null		null	null		null	null		null	null		-0.2646	0.70454		-11.202	4.4332e-06	Down			Unigene107159_All//4.00E-10//gi|13246915|gb|BE052560.2|BE052560				kegg -
Unigene107160_All	310	0.3376	0	0	0	0	0	1.9094	0	0	-8.3992	0.37642		-8.3992	0.39852		null	null		null	null		-10.8989	0.00023963	Down	-10.8989	0.00014164	Down
Unigene107166_All	1000	0.157	0.152	0.1065	0.5978	0.551	0.7678	1.057	0.1672	0.1992	-0.0467	0.98958		-0.5599	0.77638		-0.1176	0.87565		0.3611	0.67965		-2.6603	0.0002247	Down	-2.4077	0.00034588	Down	Unigene107166_All//gi|297820436|ref|XP_002878101.1|//1.00E-39//CIP111 [Arabidopsis lyrata subsp. lyrata] >gi|297323939|gb|EFH54360.1| CIP111 [Arabidopsis lyrata subsp. lyrata]	Unigene107166_All//1.00E-32//AT3G56690| CIP111 (CAM INTERACTING PROTEIN 111); ATPase/ calmodulin binding	Unigene107166_All//0.00E+00//TC173047		ko04141|Protein processing in endoplasmic reticulum	GO:0005515//GO:0009534//GO:0017111	nr -
Unigene107168_All	564	0	0.0898	0	0.0883	0.1221	0.3203	1.7242	0.5187	0.1413	6.4886	0.6217		null	null		0.4676	0.96106		1.8589	0.45881		-1.733	0.0096673		-3.6091	2.1407e-05	Down
Unigene10717_All	274	102.732	130.927	103.585	147.806	170.417	157.248	59.4083	61.9309	134.928	0.3499	9.665e-05		0.0119	0.93317		0.2054	0.0079987		0.0893	0.37566		0.06	0.67194		1.1835	3.0677e-44	Up	Unigene10717_All//gi|227204481|dbj|BAH57092.1|//6.00E-17//AT4G10970 [Arabidopsis thaliana]	Unigene10717_All//3.00E-14//AT4G10970| unknown protein	Unigene10717_All//2.00E-153//TC154089				nr +
Unigene107173_All	821	0	0	0	0	0	0	4.0169	0	0.1941	null	null		null	null		null	null		null	null		-11.9719	2.5309e-23	Down	-4.3712	3.4713e-19	Down							ESTscan -
Unigene107176_All	448	0	0	0	0	0	0	2.6425	0.3732	0.2668	null	null		null	null		null	null		null	null		-2.8239	4.4124e-05	Down	-3.3081	4.892e-06	Down	Unigene107176_All//gi|224004980|ref|XP_002296141.1|//7.00E-32//RL3, ribosomal protein 3, 60S large ribosomal subunit [Thalassiosira pseudonana CCMP1335] >gi|209586173|gb|ACI64858.1| RL3, ribosomal protein 3, 60S large ribosomal subunit [Thalassiosira pseudonana CCMP1335]	Unigene107176_All//1.00E-31//AT1G43170| ARP1 (ARABIDOPSIS RIBOSOMAL PROTEIN 1); structural constituent of ribosome			ko03010|Ribosome	GO:0030529	nr -
Unigene107179_All	1445	0	0	0	0.0689	0.0477	0	2.8382	1.3594	0.579	null	null		null	null		-0.5305	0.81906		-6.1064	0.40552		-1.062	9.1373e-05	Down	-2.2933	2.7873e-13	Down	Unigene107179_All//gi|283132365|dbj|BAI63588.1|//1.00E-128//leucine rich repeat protein [Lotus japonicus]	Unigene107179_All//2.00E-108//AT2G19330| leucine-rich repeat family protein			ko04626|Plant-pathogen interaction		nr -
Unigene107192_All	1107	0	0	0	0	0.0622	0.0408	0.2292	0.151	1.0077	null	null		null	null		5.9588	0.61532		5.3505	0.70304		-0.6021	0.64831		2.1364	0.00076245	Up	Unigene107192_All//gi|297802268|ref|XP_002869018.1|//2.00E-61//GNS1/SUR4 membrane family protein [Arabidopsis lyrata subsp. lyrata] >gi|297314854|gb|EFH45277.1| GNS1/SUR4 membrane family protein [Arabidopsis lyrata subsp. lyrata]	Unigene107192_All//2.00E-79//AT4G36830| GNS1/SUR4 membrane family protein	Unigene107192_All//3.00E-10//TC171527				nr +
Unigene107197_All	953	0.0549	0	0	0	0	0	11.8012	1.6227	0.9197	-5.7787	0.61982		-5.7787	0.63257		null	null		null	null		-2.8625	2.0082e-43	Down	-3.6816	1.3502e-56	Down	Unigene107197_All//gi|34761723|gb|AAQ82034.1|//3.00E-10//unknown [Pisum sativum]		Unigene107197_All//6.00E-70//TC161176				nr -
Unigene107201_All	391	0	0	0	0	0	0	4.866	0.2138	0	null	null		null	null		null	null		null	null		-4.5084	4.749e-11	Down	-12.2485	4.9125e-14	Down							ESTscan +
Unigene107202_All	444	0	0	0	0	0	0	1.1427	0.0941	0	null	null		null	null		null	null		null	null		-3.6021	0.0057796		-10.1582	0.00055593	Down	Unigene107202_All//gi|226347429|gb|ACO50125.1|//4.00E-60//elongation factor 1 alpha [Entosiphon sulcatum]	Unigene107202_All//5.00E-56//AT5G60390| elongation factor 1-alpha / EF-1-alpha				GO:0006412//GO:0008135//GO:0017111//GO:0032561//GO:0044424	nr -
Unigene107205_All	647	0	0	0	0	0	0	3.7902	0	0	null	null		null	null		null	null		null	null		-11.8881	2.4138e-17	Down	-11.8881	4.7324e-18	Down	Unigene107205_All//gi|81157943|dbj|BAE48222.1|//1.00E-59//elongation factor 2 [Chlorella pyrenoidosa]	Unigene107205_All//4.00E-56//AT1G56070| LOS1; copper ion binding / translation elongation factor/ translation factor, nucleic acid binding				GO:0000166//GO:0016787	nr +
Unigene107206_All	334	0	0	0	0	0	0	4.0508	0	0.1193	null	null		null	null		null	null		null	null		-11.984	1.2986e-09	Down	-5.0855	8.1248e-09	Down	Unigene107206_All//gi|145354676|ref|XP_001421604.1|//2.00E-13//Ribosomal protein S21, component of cytosolic 80S ribosome and 40S small subunit [Ostreococcus lucimarinus CCE9901] >gi|144581842|gb|ABO99897.1| Ribosomal protein S21, component of cytosolic 80S ribosome and 40S small subunit [Ostreococcus lucimarinus CCE9901]	Unigene107206_All//4.00E-11//AT5G27700| structural constituent of ribosome			ko03010|Ribosome	GO:0005198//GO:0010467//GO:0030529//GO:0031410	nr +
Unigene107214_All	395	0	0	0	0	0	0	2.0337	0.2116	0	null	null		null	null		null	null		null	null		-3.2647	0.00044859	Down	-10.9899	4.433e-06	Down	Unigene107214_All//gi|223996063|ref|XP_002287705.1|//2.00E-29//RL12, ribosomal protein 11 60S large ribosomal subunit [Thalassiosira pseudonana CCMP1335] >gi|220976821|gb|EED95148.1| RL12, ribosomal protein 11 60S large ribosomal subunit [Thalassiosira pseudonana CCMP1335]	Unigene107214_All//4.00E-29//AT5G60670| 60S ribosomal protein L12 (RPL12C)			ko03010|Ribosome		nr -
Unigene107220_All	222	5.6563	0.6847	0.2399	4.2634	3.8778	3.255	1.7141	0.1883	0.7178	-3.0463	9e-05	Down	-4.5594	8.1425e-06	Down	-0.1368	0.818		-0.3893	0.6277		-3.1863	0.031223		-1.2558	0.24824
Unigene107225_All	442	0	0	0	0	0	0	1.9131	0.3782	0	null	null		null	null		null	null		null	null		-2.3387	0.0029551		-10.9017	2.2131e-06	Down	Unigene107225_All//gi|195652927|gb|ACG45931.1|//4.00E-29//60S ribosomal protein L22-2 [Zea mays]	Unigene107225_All//2.00E-17//AT5G27770| 60S ribosomal protein L22 (RPL22C)			ko03010|Ribosome	GO:0015934//GO:0016020//GO:0031981	nr +
Unigene107231_All	339	0.463	0	0	0.4408	0.6095	0.2665	2.4944	0.6165	0.235	-8.8549	0.21672		-8.8549	0.24617		0.4675	0.82559		-0.726	0.71672		-2.0165	0.0074528		-3.408	0.00013526	Down	Unigene107231_All//gi|27901705|gb|AAO26688.1|AF478375_1//2.00E-15//gag-pol polyprotein [Vitis vinifera]		Unigene107231_All//3.00E-20//TC140327			GO:0003676//GO:0003824//GO:0006259//GO:0046872	nr +
Unigene107239_All	528	0	0	0	0	0	0	2.4023	0.1583	0	null	null		null	null		null	null		null	null		-3.9237	6.1985e-07	Down	-11.2302	1.9922e-09	Down	Unigene107239_All//gi|115453465|ref|NP_001050333.1|//4.00E-20//Os03g0406200 [Oryza sativa Japonica Group] >gi|90101284|sp|Q40682.3|EF1D2_ORYSJ RecName: Full=Elongation factor 1-delta 2; Short=EF-1-delta 2; AltName: Full=Elongation factor 1B-beta 2; AltName: Full=eEF-1B beta 2 >gi|3894214|dbj|BAA34598.1| elongation factor 1 beta 2 [Oryza sativa Japonica Group] >gi|3894216|dbj|BAA34599.1| elongatio…	Unigene107239_All//3.00E-11//AT2G18110| elongation factor 1-beta, putative / EF-1-beta, putative				GO:0006412//GO:0008135//GO:0043234	nr +
Unigene10724_All	291	0	0.6965	0	2.2254	0.9467	0.4656	2.1794	0.1436	0	9.444	0.1373		null	null		-1.2331	0.15981		-2.2569	0.027638		-3.9238	0.00098132	Down	-11.0897	7.1244e-05	Down			Unigene10724_All//5.00E-37//DT049498				ESTscan -
Unigene107242_All	230	0.455	0	2.5467	2.3824	2.3955	1.7673	49.4494	35.9807	23.2103	-8.8297	0.3764		2.4847	0.037551		0.0079	0.98276		-0.4309	0.66697		-0.4587	0.0023556		-1.0912	1.0841e-12	Down	Unigene107242_All//gi|163943787|gb|ABY49018.1|//2.00E-07//GA2-oxidase [Leersia tisserantii]	Unigene107242_All//5.00E-07//AT1G78440| ATGA2OX1 (gibberellin 2-oxidase 1); gibberellin 2-beta-dioxygenase	Unigene107242_All//3.00E-59//TC139925		ko00904|Diterpenoid biosynthesis	GO:0016706	nr +
Unigene107248_All	439	0	0	0	0	0	0	2.0225	0.5712	0.1815	null	null		null	null		null	null		null	null		-1.8241	0.010777		-3.4781	7.3374e-05	Down
Unigene10725_All	457	2.2898	0	1.8643	2.0711	2.8633	0.7906	0.185	0.0915	0	-11.161	3.8047e-06	Down	-0.2966	0.64157		0.4673	0.47085		-1.3894	0.060808		-1.0157	0.72631		-7.5314	0.36111
Unigene107256_All	438	0.1195	0.1157	0.3647	0.2275	0	0.2062	3.6681	0.9542	1.7282	-0.0466	0.98698		1.6097	0.51172		-7.8297	0.31702		-0.1418	0.95286		-1.9427	0.00014235	Down	-1.0858	0.015771
Unigene107268_All	373	0	6.5205	0.7138	0	0.5539	1.8162	0.3401	0.2241	0.2136	12.6708	7.733e-14	Up	9.4794	0.080353		9.1135	0.15734		10.8267	0.0004185	Up	-0.6018	0.76751		-0.671	0.72075		Unigene107268_All//gi|4336434|gb|AAD17804.1|//2.00E-09//nodule-enhanced protein phosphatase type 2C [Lotus japonicus]	Unigene107268_All//3.00E-08//AT5G59220| protein phosphatase 2C, putative / PP2C, putative				GO:0016787	nr -
Unigene107270_All	213	0	0.2379	0.25	0.4677	0.485	0	5.3595	0.7849	3.1796	7.8942	0.62166		7.9658	0.64092		0.0524	0.96811		-8.8694	0.40548		-2.7715	7.6232e-05	Down	-0.7533	0.16797				Unigene107270_All//4.00E-83//gi|73863243|gb|DT465982.1|DT465982				ESTscan -
Unigene107277_All	251	1.2507	1.2112	0.8486	8.137	6.5852	0.3599	0.5053	0.333	0.6349	-0.0463	0.98501		-0.5596	0.66388		-0.3053	0.53727		-4.4988	2.0202e-10	Down	-0.6016	0.7675		0.3294	0.85174				Unigene107277_All//1.00E-71//DW504295
Unigene107278_All	239	0	0	0	0	0.1441	0.3779	2.2998	0.5246	0	null	null		null	null		7.1709	0.83872		8.5619	0.48108		-2.1322	0.03317		-11.1673	0.00028118	Down	Unigene107278_All//gi|115472361|ref|NP_001059779.1|//4.00E-12//Os07g0516000 [Oryza sativa Japonica Group] >gi|34393670|dbj|BAC83370.1| alpha-rhamnosidase-like protein [Oryza sativa Japonica Group] >gi|50508733|dbj|BAD31309.1| alpha-rhamnosidase-like protein [Oryza sativa Japonica Group] >gi|113611315|dbj|BAF21693.1| Os07g0516000 [Oryza sativa Japonica Group]	Unigene107278_All//3.00E-12//AT5G57700| BNR/Asp-box repeat family protein	Unigene107278_All//6.00E-33//gi|78325962|gb|DT546236.1|DT546236				nr -
Unigene107279_All	287	0	0	0	0	0	0	1.7678	0.4369	0	null	null		null	null		null	null		null	null		-2.0166	0.052104		-10.7877	0.00055591	Down	Unigene107279_All//sp|Q9YI97|OAZ2_DANRE//7.00E-07//Ornithine decarboxylase antizyme 2 OS=Danio rerio GN=oaz2 PE=2 SV=1						swissprot +
Unigene10728_All	308	64.0421	162.537	115.49	48.0351	48.187	47.6562	209.342	252.946	101.278	1.3437	7.1257e-58	Up	0.8507	2.4025e-19		0.0046	0.98276		-0.0114	0.95165		0.273	2.3133e-07		-1.0475	1.8407e-63	Down	Unigene10728_All//gi|225440392|ref|XP_002267559.1|//4.00E-16//PREDICTED: ripening-related protein-like [Vitis vinifera]	Unigene10728_All//3.00E-14//AT5G02230| haloacid dehalogenase-like hydrolase family protein	Unigene10728_All//4.00E-127//gi|73861720|gb|DT464459.1|DT464459			GO:0003824	nr -
Unigene107285_All	224	0	0	0	0.2224	0	0.2016	2.265	0.5598	0	null	null		null	null		-7.797	0.56362		-0.1417	0.95661		-2.0165	0.052103		-11.1453	0.00055589	Down
Unigene107286_All	228	0	0	0	0	0	0	2.7816	1.2832	0.1747	null	null		null	null		null	null		null	null		-1.1162	0.18037		-3.993	0.00058255	Down	Unigene107286_All//gi|110737394|dbj|BAF00641.1|//2.00E-31//ATPase [Arabidopsis thaliana]	Unigene107286_All//7.00E-33//AT5G04930| ALA1 (aminophospholipid ATPase1); ATPase, coupled to transmembrane movement of ions, phosphorylative mechanism				GO:0005548//GO:0006869//GO:0009206//GO:0031224//GO:0032559//GO:0042625//GO:0046872	nr +
Unigene107288_All	401	0	0	0	0	0	0	1.4761	1.0423	0	null	null		null	null		null	null		null	null		-0.502	0.57398		-10.5276	0.00014164	Down	Unigene107288_All//gi|298711973|emb|CBJ32915.1|//6.00E-25//ribosomal protein L35 [Ectocarpus siliculosus]	Unigene107288_All//7.00E-26//AT1G74270| 60S ribosomal protein L35a (RPL35aC)			ko03010|Ribosome	GO:0009987//GO:0015934//GO:0043231	nr -
Unigene107296_All	477	0	0	0	0	0	0	2.8364	0.4381	0	null	null		null	null		null	null		null	null		-2.6947	1.7664e-05	Down	-11.4698	4.8627e-10	Down	Unigene107296_All//gi|301105230|ref|XP_002901699.1|//1.00E-51//40S ribosomal protein S11 [Phytophthora infestans T30-4] >gi|262100703|gb|EEY58755.1| 40S ribosomal protein S11 [Phytophthora infestans T30-4]	Unigene107296_All//1.00E-47//AT3G48930| EMB1080 (embryo defective 1080); structural constituent of ribosome			ko03010|Ribosome	GO:0003723//GO:0005198//GO:0009536//GO:0010467//GO:0015935//GO:0030312	nr +
Unigene107298_All	242	42.3755	35.1755	26.845	47.9616	70.7204	83.6083	80.0179	744.206	90.2131	-0.2687	0.14874		-0.6586	0.00037194		0.5602	8.1926e-06		0.8018	2.8531e-11		3.2173	0	Up	0.173	0.11511		Unigene107298_All//gi|297610489|ref|NP_001064615.2|//2.00E-18//Os10g0419100 [Oryza sativa Japonica Group] >gi|255679407|dbj|BAF26529.2| Os10g0419100 [Oryza sativa Japonica Group]	Unigene107298_All//2.00E-13//AT1G60690| aldo/keto reductase family protein	Unigene107298_All//3.00E-81//DR044167			GO:0004033//GO:0008152	nr +
Unigene107299_All	570	0	0	0	0	0	0	2.8929	0.5866	0.2097	null	null		null	null		null	null		null	null		-2.3021	1.3566e-05	Down	-3.7861	5.2202e-09	Down	Unigene107299_All//gi|260516654|gb|ACX43954.1|//3.00E-39//cysteine protease 1 [Brachiaria hybrid cultivar] >gi|260516656|gb|ACX43955.1| cysteine protease 1 [Brachiaria hybrid cultivar] >gi|260516658|gb|ACX43956.1| cysteine protease 1 [Brachiaria hybrid cultivar] >gi|260516660|gb|ACX43957.1| cysteine protease 1 [Brachiaria hybrid cultivar] >gi|260516662|gb|ACX43958.1| cysteine protease 2 [Brachiar…	Unigene107299_All//1.00E-37//AT5G60360| AALP (Arabidopsis aleurain-like protease); cysteine-type peptidase				GO:0005488//GO:0009725//GO:0032502//GO:0043231//GO:0070011	nr -
Unigene10730_All	503	0.5201	0.1007	4.6581	0.1981	0.89	0	0	0	0	-2.3687	0.21413		3.1629	3.2791e-08	Up	2.1676	0.10644		-7.6301	0.40548		null	null		null	null		Unigene10730_All//gi|56130780|ref|YP_145683.1|//9.00E-12//two component response transcription regulator [Ralstonia metallidurans CH34] >gi|94152513|ref|YP_581920.1| regulator protein CopR [Cupriavidus metallidurans CH34] >gi|10047062|emb|CAC07978.1| CopR protein [Ralstonia metallidurans CH34] >gi|56068770|emb|CAI11332.1| two component response transcription regulator [Ralstonia metallidurans CH3…					GO:0005622//GO:0006350	nr -
Unigene107300_All	502	0	0	0	0	0	0	3.8743	0.1665	0.9523	null	null		null	null		null	null		null	null		-4.5403	2.494e-11	Down	-2.0244	7.2346e-06	Down	Unigene107300_All//gi|188496902|dbj|BAG32350.1|//1.00E-12//glucan binding protein-2 [Actinophrys sol]						nr +
Unigene107302_All	244	0	0	0	0	0	0	3.2923	1.0278	0.3265	null	null		null	null		null	null		null	null		-1.6795	0.024612		-3.3339	0.00024683	Down
Unigene10731_All	275	0.5708	0	0	4.5286	2.5044	0	0.1537	0	0.1449	-9.1568	0.21672		-9.1568	0.24617		-0.8546	0.14673		-12.1448	8.6453e-08	Down	-7.264	0.66262		-0.0851	0.97345				Unigene10731_All//3.00E-118//TC158907
Unigene107315_All	236	0	0	0	0	0	0	3.0456	0	0	null	null		null	null		null	null		null	null		-11.5725	3.2682e-05	Down	-11.5725	1.7829e-05	Down							ESTscan +
Unigene107317_All	359	0.7287	0	0.7416	1.8039	0.3837	0.1258	4.2398	1.1642	0.5549	-9.5092	0.06723		0.0253	1.0032		-2.2331	0.017895		-3.8419	0.0026977		-1.8647	0.00035014	Down	-2.9337	7.5775e-07	Down			Unigene107317_All//1.00E-90//ES850878
Unigene107328_All	244	0	0	0	0	0	0	2.0794	0	0	null	null		null	null		null	null		null	null		-11.022	0.00089083	Down	-11.022	0.00055587	Down	Unigene107328_All//sp|Q9PLI5|Y114_CHLMU//1.00E-06//Uncharacterized protein TC_0114 OS=Chlamydia muridarum GN=TC_0114 PE=4 SV=2						swissprot +
Unigene107329_All	264	0	0	0	0.7548	0	0	4.6444	5.0661	0.9054	null	null		null	null		-9.56	0.084758		-9.56	0.13434		0.1254	0.81364		-2.3589	0.00012186	Down
Unigene107333_All	257	0	0	0	0.3877	0	0.3515	85.2184	46.9999	242.752	null	null		null	null		-8.5988	0.31701		-0.1414	0.95285		-0.8585	1.1942e-15		1.5102	2.99e-107	Up	Unigene107333_All//gi|40218371|gb|AAR83118.1|//2.00E-47//secretory laccase [Gossypium arboreum]	Unigene107333_All//1.00E-31//AT5G09360| LAC14 (laccase 14); laccase	Unigene107333_All//8.00E-122//TC137114		ko00910|Nitrogen metabolism//ko00053|Ascorbate and aldarate metabolism	GO:0005576//GO:0009808//GO:0016682//GO:0046914	nr +
Unigene107337_All	338	0	0	0	0	0	0	8.2559	3.7097	0.2357	null	null		null	null		null	null		null	null		-1.1541	0.00069782	Down	-5.1304	9.1693e-18	Down	Unigene107337_All//gi|2894308|emb|CAA11269.1|//3.00E-38//polyubiquitin [Nicotiana tabacum]	Unigene107337_All//5.00E-34//AT4G05320| UBQ10 (POLYUBIQUITIN 10); protein binding	Unigene107337_All//4.00E-41//BF277514			GO:0031410//GO:0043231	nr -
Unigene107338_All	512	0	0	0	0	0	0	3.9638	1.7959	0.1556	null	null		null	null		null	null		null	null		-1.1422	0.0052666		-4.671	1.8281e-12	Down
Unigene107345_All	527	0.1986	0	0	0.2836	1.0455	0.1714	4.4125	0.4759	0.4536	-7.6337	0.37637		-7.6337	0.39847		1.8823	0.094184		-0.7265	0.71671		-3.2129	1.586e-10	Down	-3.2821	3.9062e-11	Down	Unigene107345_All//gi|28466815|gb|AAO44016.1|//1.00E-08//At1g11655 [Arabidopsis thaliana]		Unigene107345_All//7.00E-22//DW518236				nr +
Unigene107348_All	497	0.2105	0.4078	0.2143	2.0046	0.1386	0.3635	1.7014	0.5887	0.6413	0.954	0.62234		0.0258	1.0017		-3.8543	1.6069e-05	Down	-2.4633	0.0020716		-1.5311	0.032142		-1.4077	0.037005		Unigene107348_All//gi|18415647|ref|NP_568185.1|//4.00E-14//mitochondrial transcription termination factor family protein / mTERF family protein [Arabidopsis thaliana]	Unigene107348_All//1.00E-15//AT5G07900| mitochondrial transcription termination factor family protein / mTERF family protein				GO:0044464	nr -
Unigene107350_All	496	0	0	0	0	0	0	1.6196	0	0.1606	null	null		null	null		null	null		null	null		-10.6614	8.5834e-06	Down	-3.3341	0.00024682	Down
Unigene107351_All	383	0.4098	0	0.2781	0	0	0	4.1949	0.9821	4.6808	-8.6788	0.21672		-0.5593	0.77637		null	null		null	null		-2.0947	5.8749e-05	Down	0.1581	0.71234		Unigene107351_All//gi|73624747|gb|AAZ79231.1|//6.00E-14//cellulose synthase-like protein CslG [Nicotiana tabacum]	Unigene107351_All//1.00E-10//AT4G24000| ATCSLG2; cellulose synthase/ transferase/ transferase, transferring glycosyl groups				GO:0009987//GO:0016020//GO:0016757	nr +
Unigene107354_All	395	0.9272	0.5131	0.5392	1.6395	1.0461	0.5717	1.9267	0	0.3026	-0.8536	0.48878		-0.7821	0.55333		-0.6482	0.46006		-1.5199	0.11161		-10.9119	1.6769e-05	Down	-2.6706	0.0016367		Unigene107354_All//gi|240255876|ref|NP_193313.5|//1.00E-51//ATVAMP724 [Arabidopsis thaliana]	Unigene107354_All//3.00E-52//AT4G15780| ATVAMP724	Unigene107354_All//2.00E-169//TC163824			GO:0006810//GO:0031224	nr -
Unigene107361_All	289	0	0	0	0	0	0	2.0482	0.4339	0	null	null		null	null		null	null		null	null		-2.2389	0.02071		-11.0001	0.00014163	Down	Unigene107361_All//gi|298713802|emb|CBJ27174.1|//4.00E-10//phosphatase PP1 [Ectocarpus siliculosus]	Unigene107361_All//2.00E-05//AT1G64040| TOPP3; protein serine/threonine phosphatase				GO:0016791	nr -
Unigene107362_All	499	0	0	0	0	0	0	1.6946	0.335	0.2395	null	null		null	null		null	null		null	null		-2.3387	0.002955		-2.8228	0.00053783	Down	Unigene107362_All//gi|288310312|gb|ADC45395.1|//1.00E-43//HSP90-1 [Glycine max]	Unigene107362_All//2.00E-36//AT5G56010| HSP81-3; ATP binding / unfolded protein binding			ko04626|Plant-pathogen interaction//ko04141|Protein processing in endoplasmic reticulum	GO:0005515//GO:0006950//GO:0016020//GO:0031981//GO:0032559//GO:0044267//GO:0044444//GO:0051592	nr +
Unigene107363_All	228	0	0	0	0	0	0	2.4107	0.7333	0	null	null		null	null		null	null		null	null		-1.717	0.072353		-11.2352	0.00028116	Down	Unigene107363_All//gi|26190436|emb|CAD45251.1|//4.00E-06//barley B recombinant [Hordeum vulgare]					GO:0005488	nr -
Unigene107364_All	594	0.2642	0.7677	0.6275	0.8386	0.8696	1.2165	4.0572	0.9851	1.4755	1.5389	0.19623		1.248	0.36582		0.0524	0.97989		0.5367	0.5605		-2.0421	7.0918e-07	Down	-1.4593	8.4139e-05	Down	Unigene107364_All//gi|108864347|gb|ABA93307.2|//7.00E-47//expressed protein [Oryza sativa (japonica cultivar-group)]	Unigene107364_All//3.00E-41//AT5G53900| unknown protein	Unigene107364_All//1.00E-82//gi|78323562|gb|DT543836.1|DT543836				nr -
Unigene10737_All	400	0	3.9269	2.2631	0	0	0	0	0	0	11.9392	5.7056e-09	Up	11.1441	4.7139e-05	Up	null	null		null	null		null	null		null	null		Unigene10737_All//gi|301121760|ref|XP_002908607.1|//1.00E-30//succinyl-CoA ligase subunit alpha, mitochondrial precursor [Phytophthora infestans T30-4] >gi|262103638|gb|EEY61690.1| succinyl-CoA ligase subunit alpha, mitochondrial precursor [Phytophthora infestans T30-4]	Unigene10737_All//5.00E-27//AT5G23250| succinyl-CoA ligase (GDP-forming) alpha-chain, mitochondrial, putative / succinyl-CoA synthetase, alpha chain, putative / SCS-alpha, putative			ko00020|Citrate cycle (TCA cycle)//ko00640|Propanoate metabolism	GO:0004774//GO:0009060//GO:0043231//GO:0046912	nr +
Unigene107372_All	291	0.1798	0	0	0	0.1183	0	1.7435	0	0.6845	-7.4902	0.61976		-7.4902	0.63248		6.8863	0.83868		null	null		-10.7678	0.00089079	Down	-1.3489	0.1403		Unigene107372_All//gi|115469532|ref|NP_001058365.1|//6.00E-16//Os06g0678800 [Oryza sativa Japonica Group] >gi|113596405|dbj|BAF20279.1| Os06g0678800 [Oryza sativa Japonica Group]	Unigene107372_All//4.00E-12//AT4G22010| sks4 (SKU5 Similar 4); copper ion binding / oxidoreductase	Unigene107372_All//8.00E-36//gi|164305746|gb|EV495235.1|EV495235		ko00053|Ascorbate and aldarate metabolism	GO:0031410	nr +
Unigene107385_All	233	0	0	0	0	0	0	2.1775	0.1794	0	null	null		null	null		null	null		null	null		-3.6014	0.0057794		-11.0885	0.00055585	Down
Unigene1074_All	1273	15.0839	20.2598	19.7021	48.0924	58.3209	50.2367	10.4953	69.4735	4.131	0.4256	7.0426e-05		0.3853	0.00066384		0.2782	8.1976e-07		0.0629	0.45312		2.7267	0	Up	-1.3452	3.4504e-20	Down	Unigene1074_All//gi|57229665|gb|AAW45741.1|//0.00E+00//sinapyl alcohol dehydrogenase-like protein [Populus tremula x Populus tremuloides]	Unigene1074_All//8.00E-116//AT4G37970| CAD6 (CINNAMYL ALCOHOL DEHYDROGENASE 6); binding / catalytic/ oxidoreductase/ zinc ion binding	Unigene1074_All//0.00E+00//TC154710		ko00940|Phenylpropanoid biosynthesis	GO:0003824//GO:0008152//GO:0046914	nr +
Unigene10740_All	416	0	0	0	0.1197	0	0	5.8948	5.6263	0.8619	null	null		null	null		-6.9033	0.56355		-6.9033	0.64515		-0.0673	0.86478		-2.7739	4.8099e-10	Down			Unigene10740_All//3.00E-08//TC158843
Unigene107402_All	735	0	0	0	0	0	0	4.6019	2.4452	0.9214	null	null		null	null		null	null		null	null		-0.9123	0.0023769		-2.3203	3.0811e-11	Down	Unigene107402_All//gi|238014838|gb|ACR38454.1|//1.00E-07//unknown [Zea mays]		Unigene107402_All//3.00E-22//TC146753				nr +
Unigene107407_All	265	14.018	4.3977	7.033	1.5038	3.5085	2.2156	1.2764	0.1577	0	-1.6725	1.2529e-06	Down	-0.9951	0.0029509		1.2222	0.10488		0.5591	0.60075		-3.0168	0.053136		-10.3179	0.0081809		Unigene107407_All//gi|18400342|ref|NP_565556.1|//7.00E-15//YCF37 (Arabidopsis homolog of Synechocystis YCF37) [Arabidopsis thaliana] >gi|3152615|gb|AAC17094.1| expressed protein [Arabidopsis thaliana] >gi|16648702|gb|AAL25543.1| At2g23670/F26B6.32 [Arabidopsis thaliana] >gi|20197003|gb|AAM14867.1| expressed protein [Arabidopsis thaliana] >gi|20334912|gb|AAM16212.1| At2g23670/F26B6.32 [Arabidopsis…	Unigene107407_All//1.00E-07//AT2G23670| YCF37 (Arabidopsis homolog of Synechocystis YCF37)	Unigene107407_All//2.00E-67//TC158076			GO:0009534	nr -
Unigene107411_All	227	0	2.0089	3.0496	1.975	2.4272	1.1937	0.9313	0	0.8775	10.9722	0.0074435		11.5744	0.00061689	Up	0.2974	0.81795		-0.7264	0.53253		-9.8631	0.074777		-0.0858	0.96139
Unigene107413_All	221	0.947	1.8342	1.6867	0.6762	0.4674	2.248	3.2523	8.8887	8.833	0.9537	0.41401		0.8328	0.51642		-0.5328	0.78583		1.7331	0.14478		1.4505	0.00072629	Up	1.4414	0.00059959	Up			Unigene107413_All//7.00E-11//TC158642
Unigene107416_All	509	0.6167	0.3982	0	0.0979	0.1353	0	1.7444	0	0.0783	-0.6311	0.62218		-9.2684	0.049301		0.4668	0.96102		-6.6132	0.64513		-10.7685	2.2436e-06	Down	-4.4776	1.235e-05	Down	Unigene107416_All//gi|15229025|ref|NP_190449.1|//8.00E-24//sterile alpha motif (SAM) domain-containing protein [Arabidopsis thaliana]	Unigene107416_All//5.00E-25//AT3G48800| sterile alpha motif (SAM) domain-containing protein	Unigene107416_All//3.00E-129//TC176975				nr -
Unigene107417_All	388	0	0	0	0	0	0	3.9229	0.754	0	null	null		null	null		null	null		null	null		-2.3793	2.1528e-05	Down	-11.9377	2.8842e-11	Down
Unigene107424_All	295	0	0	0	0	0	0	3.5831	0.5667	0	null	null		null	null		null	null		null	null		-2.6606	0.00022469	Down	-11.807	6.7261e-08	Down	Unigene107424_All//gi|300266716|gb|EFJ50902.1|//3.00E-14//elongation factor 2 (EF-2, EF-TU) [Volvox carteri f. nagariensis]	Unigene107424_All//2.00E-15//AT1G56070| LOS1; copper ion binding / translation elongation factor/ translation factor, nucleic acid binding				GO:0000166//GO:0006950//GO:0008135//GO:0009536//GO:0016020//GO:0016787//GO:0031981//GO:0046914	nr -
Unigene107430_All	502	0	0.3028	0	0.2977	0	0.1799	1.6002	1.5819	6.1107	8.2422	0.23647		null	null		-8.2177	0.16634		-0.7267	0.71669		-0.0166	1.018		1.9331	3.2874e-08	Up	Unigene107430_All//gi|115472685|ref|NP_001059941.1|//3.00E-45//Os07g0550900 [Oryza sativa Japonica Group] >gi|113611477|dbj|BAF21855.1| Os07g0550900 [Oryza sativa Japonica Group]	Unigene107430_All//2.00E-46//AT4G27300| S-locus protein kinase, putative	Unigene107430_All//2.00E-28//gi|164366409|gb|ES802621.1|ES802621		ko04626|Plant-pathogen interaction	GO:0004702//GO:0006464//GO:0008037//GO:0030246//GO:0032559	nr -
Unigene107437_All	489	0	0	0	0	0	0	1.3834	0.2564	0	null	null		null	null		null	null		null	null		-2.4318	0.0077676		-10.434	3.5688e-05	Down							ESTscan +
Unigene107438_All	581	0	0	0	0	0	0	2.6925	0.4316	0	null	null		null	null		null	null		null	null		-2.6412	4.0792e-06	Down	-11.3947	1.4207e-11	Down
Unigene107444_All	616	0	0.1645	0.5187	0	0.559	0	2.3336	0.1357	0.9701	7.3619	0.39038		9.0188	0.045371		9.1267	0.030159		null	null		-4.1041	5.15e-08	Down	-1.2664	0.0093399
Unigene107449_All	339	0	0	0	0	0	0	2.4944	0.1233	0	null	null		null	null		null	null		null	null		-4.3384	4.5556e-05	Down	-11.2845	2.213e-06	Down							ESTscan -
Unigene107450_All	879	0.2381	0.0576	0	0.17	0.0392	0.1541	2.0202	0.523	0.4079	-2.0474	0.33393		-7.8954	0.14659		-2.1166	0.38737		-0.1417	0.94413		-1.9496	5.3664e-05	Down	-2.3082	3.0844e-06	Down							ESTscan -
Unigene107451_All	867	0	0	0	0	0	0	2.3895	0.0482	0.0459	null	null		null	null		null	null		null	null		-5.6315	2.8604e-13	Down	-5.7021	7.2095e-14	Down	Unigene107451_All//gi|301122631|ref|XP_002909042.1|//2.00E-63//40S ribosomal protein S6 [Phytophthora infestans T30-4] >gi|262099804|gb|EEY57856.1| 40S ribosomal protein S6 [Phytophthora infestans T30-4]	Unigene107451_All//9.00E-58//AT4G31700| RPS6 (RIBOSOMAL PROTEIN S6); structural constituent of ribosome	Unigene107451_All//3.00E-16//CD486323		ko03010|Ribosome	GO:0005198//GO:0010467//GO:0015935//GO:0016020	nr -
Unigene107452_All	837	0	0	0	0.119	0.288	0.1079	5.6576	0.8489	1.0471	null	null		null	null		1.2751	0.53215		-0.1413	0.95283		-2.7365	8.0158e-18	Down	-2.4338	2.8566e-16	Down	Unigene107452_All//gi|15222073|ref|NP_175349.1|//2.00E-56//zinc finger (C3HC4-type RING finger) family protein [Arabidopsis thaliana] >gi|68565178|sp|Q6NQG7.1|ATL1L_ARATH RecName: Full=RING-H2 finger protein ATL1L >gi|34365601|gb|AAQ65112.1| At1g49230 [Arabidopsis thaliana]	Unigene107452_All//2.00E-48//AT1G49230| zinc finger (C3HC4-type RING finger) family protein	Unigene107452_All//0.00E+00//TC137887		ko04141|Protein processing in endoplasmic reticulum//ko04120|Ubiquitin mediated proteolysis	GO:0019787//GO:0032446//GO:0046914	nr +
Unigene107455_All	610	0	0	0	0	0	0	5.1291	1.3018	0.9796	null	null		null	null		null	null		null	null		-1.9782	2.1638e-08	Down	-2.3884	8.6245e-11	Down	Unigene107455_All//gi|118572295|sp|Q8LBI9.2|EDL16_ARATH//2.00E-25//RecName: Full=Sugar transporter ERD6-like 16 >gi|17381265|gb|AAL36051.1| AT5g18840/F17K4_90 [Arabidopsis thaliana] >gi|23309019|gb|AAN18269.1| At5g18840/F17K4_90 [Arabidopsis thaliana]	Unigene107455_All//1.00E-26//AT5G18840| sugar transporter, putative	Unigene107455_All//2.00E-10//TC145455			GO:0006810//GO:0016020//GO:0022891	nr -
Unigene107456_All	460	0	0	0	0	0	0	2.2059	0	0.6062	null	null		null	null		null	null		null	null		-11.1072	2.9727e-07	Down	-1.8635	0.0035358		Unigene107456_All//gi|3834323|gb|AAC83039.1|//2.00E-40//F9K20.25 [Arabidopsis thaliana]	Unigene107456_All//2.00E-41//AT1G78710| unknown protein	Unigene107456_All//1.00E-162//gi|109862280|gb|DW491257.1|DW491257				nr -
Unigene10748_All	243	30.359	927.272	324.978	95.9385	221.208	295.699	0	0.172	0	4.9328	0	Up	3.4201	2.6115e-285	Up	1.2052	5.0968e-62	Up	1.6239	1.0121e-117	Up	7.4263	0.6379		null	null		Unigene10748_All//gi|6723687|emb|CAB67122.1|//1.00E-12//cell wall protein [Nicotiana tabacum] >gi|270313156|gb|ACZ73645.1| glycine-rich protein precursor [Nicotiana tabacum]		Unigene10748_All//1.00E-129//TC169148				nr +
Unigene107487_All	357	13.3367	220.561	27.2962	20.0931	35.9786	54.3985	80.7706	165.661	128.22	4.0477	0	Up	1.0333	9.7591e-08	Up	0.8404	1.4586e-08		1.4369	6.4136e-27	Up	1.0363	1.2933e-55	Up	0.6667	2.5596e-21		Unigene107487_All//gi|13161401|dbj|BAB33035.1|//5.00E-17//CPRD48 [Vigna unguiculata]	Unigene107487_All//2.00E-16//AT5G42050| FUNCTIONS IN: molecular_function unknown; EXPRESSED IN: 22 plant structures; EXPRESSED DURING: 13 growth stages; CONTAINS InterPro DOMAIN/s: Development and cell death domain (InterPro:IPR013989), Kelch related (InterPro:IPR013089); BEST Arabidopsis thaliana protein match is: unknown protein (TAIR:AT3G27090.1); Has 5084 Blast hits to 2870 proteins in 85 spe…	Unigene107487_All//2.00E-147//TC138767				nr +
Unigene107488_All	1293	0.4856	0.5486	0.5766	0.0771	0.2131	0.0699	0.4578	0.7758	1.4481	0.176	0.81688		0.2478	0.74542		1.4667	0.42013		-0.1414	0.95281		0.761	0.22847		1.6614	0.00017179	Up	Unigene107488_All//gi|15221299|ref|NP_176986.1|//3.00E-29//zinc finger (B-box type) family protein [Arabidopsis thaliana] >gi|17433041|sp|Q9C9F4.1|COLX_ARATH RecName: Full=Putative zinc finger protein At1g68190	Unigene107488_All//2.00E-31//AT1G68190| zinc finger (B-box type) family protein	Unigene107488_All//0.00E+00//TC157110	C2C2-CO-like	ko04712|Circadian rhythm - plant		nr +
Unigene10749_All	430	0	0	0	0	0	0	3.933	3.6936	1.2971	null	null		null	null		null	null		null	null		-0.0906	0.84755		-1.6003	0.00051284	Down			Unigene10749_All//3.00E-27//ES810763
Unigene107493_All	662	0	0	0	0	0	0	3.1295	3.2199	0	null	null		null	null		null	null		null	null		0.0411	0.93875		-11.6117	2.8571e-15	Down	Unigene107493_All//gi|192910824|gb|ACF06520.1|//3.00E-64//60S ribosomal protein L7 [Elaeis guineensis]	Unigene107493_All//1.00E-56//AT3G13580| 60S ribosomal protein L7 (RPL7D)			ko03010|Ribosome		nr -
Unigene107494_All	233	0	0	0	0	0	0	2.5404	1.435	0	null	null		null	null		null	null		null	null		-0.824	0.34835		-11.3108	0.00014163	Down	Unigene107494_All//gi|29539344|dbj|BAC67673.1|//6.00E-14//ribosomal protein S8 [Cyanidioschyzon merolae]	Unigene107494_All//6.00E-13//AT5G20290| 40S ribosomal protein S8 (RPS8A)			ko03010|Ribosome		nr -
Unigene107495_All	392	0	0	0	0	0	0	8.9522	0.6397	0.2033	null	null		null	null		null	null		null	null		-3.8068	6.8723e-18	Down	-5.4606	7.6212e-23	Down
Unigene107501_All	256	0	0	0	0	0	0	2.3122	0	0	null	null		null	null		null	null		null	null		-11.1751	0.00023962	Down	-11.1751	0.00014162	Down
Unigene107504_All	254	0	0	0	0	0	0	3.4956	0	0.3137	null	null		null	null		null	null		null	null		-11.7713	2.2435e-06	Down	-3.4781	7.3371e-05	Down	Unigene107504_All//gi|159471131|ref|XP_001693710.1|//3.00E-06//ribosomal protein S3a, component of cytosolic 80S ribosome and 40S small subunit [Chlamydomonas reinhardtii] >gi|269969596|sp|A8HS48.1|RS3A_CHLRE RecName: Full=40S ribosomal protein S3a >gi|158283213|gb|EDP08964.1| ribosomal protein S3a [Chlamydomonas reinhardtii]				ko03010|Ribosome		nr +
Unigene107509_All	402	0	0	0	0	0	0	2.3138	1.4556	0	null	null		null	null		null	null		null	null		-0.6687	0.31235		-11.176	5.482e-07	Down	Unigene107509_All//gi|195615414|gb|ACG29537.1|//1.00E-33//60S ribosomal protein L23a [Zea mays] >gi|195641834|gb|ACG40385.1| 60S ribosomal protein L23a [Zea mays] >gi|195645532|gb|ACG42234.1| 60S ribosomal protein L23a [Zea mays]	Unigene107509_All//2.00E-30//AT3G55280| RPL23AB (RIBOSOMAL PROTEIN L23AB); RNA binding / nucleotide binding / structural constituent of ribosome	Unigene107509_All//1.00E-13//DW502458		ko03010|Ribosome		nr +
Unigene10751_All	441	1.3051	0.5745	0.1207	3.1628	1.6398	0.7169	0.3835	0.853	0.813	-1.1838	0.22609		-3.4347	0.014067		-0.9477	0.081567		-2.1414	0.00061638	Down	1.1533	0.32762		1.084	0.34978		Unigene10751_All//gi|124359292|gb|ABD28429.2|//3.00E-52//Regulator of chromosome condensation/beta-lactamase-inhibitor protein II [Medicago truncatula]	Unigene10751_All//5.00E-45//AT3G03790| ankyrin repeat family protein / regulator of chromosome condensation (RCC1) family protein					nr +
Unigene107517_All	309	0	0	0	0	0	0	2.0524	0.1353	1.2893	null	null		null	null		null	null		null	null		-3.9231	0.00098128	Down	-0.6707	0.38608
Unigene107518_All	267	0	0	0	0	0	0	2.3753	0.3131	0	null	null		null	null		null	null		null	null		-2.9234	0.0041975		-11.2139	7.1242e-05	Down	Unigene107518_All//gi|60543080|dbj|BAD90789.1|//8.00E-22//histone 3 [Marchantia polymorpha]	Unigene107518_All//2.00E-20//AT1G75600| histone H3.2, putative					nr +
Unigene107519_All	264	0	0	0	0	0	0	2.4023	0	0.3018	null	null		null	null		null	null		null	null		-11.2302	0.00012353	Down	-2.9928	0.0025795
Unigene107521_All	444	0	0	0	0	0.0776	0	2.095	0.0941	0.6281	null	null		null	null		6.278	0.83858		null	null		-4.4766	1.3021e-05	Down	-1.7379	0.0085454				Unigene107521_All//2.00E-126//CO128086
Unigene107532_All	369	0	0	0	0	0	0	6.0728	1.0194	0.5398	null	null		null	null		null	null		null	null		-2.5746	2.9039e-08	Down	-3.4919	2.6111e-11	Down	Unigene107532_All//gi|10802935|gb|AAG23683.1|AF288091_28//2.00E-20//apocytochrome b [Thraustochytrium aureum]	Unigene107532_All//1.00E-14//ATMG00220| Mitochondrial apocytochrome b (cob) gene encodes a subunit of the ubiquinol-cytochrome c oxidoreductase and is part of a 5 kb transcript. The transcript also contains a pseudogene for ribosomal protein S14 called RPS15 and a tRNA(Ser) gene. Both the Cob and RPS15 genes are edited in the transcript.			ko00190|Oxidative phosphorylation		nr +
Unigene107537_All	259	0.808	0	0	0.1923	0.133	0.3488	5.2238	0.3227	0.7691	-9.6582	0.1226		-9.6582	0.14659		-0.5319	0.82834		0.859	0.79674		-4.0168	1.7968e-07	Down	-2.7639	7.5129e-06	Down			Unigene107537_All//6.00E-24//TC140227
Unigene107544_All	240	0	0	0	0	0	0	2.9948	0.1741	0	null	null		null	null		null	null		null	null		-4.1045	0.00029148	Down	-11.5482	1.7828e-05	Down	Unigene107544_All//gi|6094014|sp|O82528.1|RL15_PETHY//5.00E-11//RecName: Full=60S ribosomal protein L15 >gi|3608479|gb|AAD13389.1| ribosomal protein L15 [Petunia x hybrida]	Unigene107544_All//1.00E-08//AT4G16720| 60S ribosomal protein L15 (RPL15A)			ko03010|Ribosome		nr -
Unigene107546_All	363	0	0	0	0	0	0	2.3295	0.1151	0	null	null		null	null		null	null		null	null		-4.3391	4.5554e-05	Down	-11.1858	2.2129e-06	Down	Unigene107546_All//gi|226502949|ref|NP_001149726.1|//2.00E-35//60S ribosomal protein L5-1 [Zea mays] >gi|195629822|gb|ACG36552.1| 60S ribosomal protein L5-1 [Zea mays]	Unigene107546_All//3.00E-30//AT3G25520| ATL5 (A. THALIANA RIBOSOMAL PROTEIN L5); 5S rRNA binding / structural constituent of ribosome			ko03010|Ribosome		nr -
Unigene107553_All	232	0	0	0	0	0	0	5.4673	1.6214	0.3434	null	null		null	null		null	null		null	null		-1.7536	0.002189		-3.9929	2.564e-07	Down							ESTscan +
Unigene10756_All	489	0	9.5329	4.9003	0	0	0	0	0	0	13.2187	1.4574e-26	Up	12.2587	3.2423e-13	Up	null	null		null	null		null	null		null	null
Unigene107564_All	372	0	0	0	0	0	0	2.5004	0	0	null	null		null	null		null	null		null	null		-11.2879	1.1458e-06	Down	-11.2879	5.4817e-07	Down
Unigene107569_All	273	269.462	298.449	201.687	64.2293	100.531	93.3046	19.6688	198.568	99.8155	0.1474	0.01502		-0.418	1.756e-11		0.6463	1.8563e-11		0.5387	2.8e-07		3.3357	7.8255e-240	Up	2.3434	9.2807e-85	Up	Unigene107569_All//gi|255647586|gb|ACU24256.1|//2.00E-16//unknown [Glycine max]		Unigene107569_All//3.00E-66//gi|109847166|gb|DW476146.1|DW476146				nr -
Unigene10757_All	356	0	39.8524	18.5477	0	0	0	0	0	0	15.2824	1.8168e-81	Up	14.179	7.3722e-37	Up	null	null		null	null		null	null		null	null		Unigene10757_All//gi|224005945|ref|XP_002291933.1|//1.00E-18//trypsin-like serine protease [Thalassiosira pseudonana CCMP1335] >gi|220972452|gb|EED90784.1| trypsin-like serine protease [Thalassiosira pseudonana CCMP1335]					GO:0016787	nr +
Unigene107570_All	611	0	0	0	0	0	0	15.016	1.7785	14.5401	null	null		null	null		null	null		null	null		-3.0778	3.4118e-38	Down	-0.0465	0.79929		Unigene107570_All//gi|15233696|ref|NP_195527.1|//6.00E-18//zinc finger (C3HC4-type RING finger) family protein [Arabidopsis thaliana] >gi|68565341|sp|Q9SZL4.1|ATL4N_ARATH RecName: Full=RING-H2 finger protein ATL4N; Flags: Precursor >gi|124301120|gb|ABN04812.1| At4g38140 [Arabidopsis thaliana]	Unigene107570_All//3.00E-19//AT4G38140| zinc finger (C3HC4-type RING finger) family protein			ko04120|Ubiquitin mediated proteolysis		nr -
Unigene107577_All	271	0	0	0	0	0	0	2.8083	0	0	null	null		null	null		null	null		null	null		-11.4555	1.6768e-05	Down	-11.4555	8.8877e-06	Down	Unigene107577_All//gi|1256830|gb|AAB68374.1|//2.00E-06//cysteine endopeptidase 1 [Phaseolus vulgaris] >gi|2959418|emb|CAA12118.1| cysteine protease [Phaseolus vulgaris]	Unigene107577_All//5.00E-05//AT3G45310| cysteine proteinase, putative					nr -
Unigene10758_All	991	0	0.3579	0.5373	6.4844	8.409	3.2357	0.256	0	0.2412	8.4834	0.024664		9.0696	0.0040474		0.375	0.066497		-1.0029	1.2405e-05	Down	-8	0.040596		-0.0859	0.95723		Unigene10758_All//gi|75296458|sp|Q7XSK0.2|BGL18_ORYSJ//3.00E-58//RecName: Full=Beta-glucosidase 18; Short=Os4bglu18; Flags: Precursor >gi|38345329|emb|CAE54546.1| OSJNBa0004N05.26 [Oryza sativa (japonica cultivar-group)] >gi|38345687|emb|CAE01910.2| OSJNBb0070J16.3 [Oryza sativa (japonica cultivar-group)] >gi|116310833|emb|CAH67620.1| OSIGBa0140J09.1 [Oryza sativa (indica cultivar-group)]	Unigene10758_All//4.00E-56//AT4G21760| BGLU47 (Beta-glucosidase 47); catalytic/ cation binding / hydrolase, hydrolyzing O-glycosyl compounds	Unigene10758_All//0.00E+00//CO109603		ko00500|Starch and sucrose metabolism//ko00940|Phenylpropanoid biosynthesis//ko00460|Cyanoamino acid metabolism	GO:0008422//GO:0009699//GO:0031410//GO:0043167	nr +
Unigene107582_All	929	0	0	0	0	0	0	4.8242	1.7546	0.0858	null	null		null	null		null	null		null	null		-1.4591	6.6087e-08	Down	-5.8132	8.7732e-30	Down	Unigene107582_All//gi|115465379|ref|NP_001056289.1|//1.00E-55//Os05g0557500 [Oryza sativa Japonica Group] >gi|113579840|dbj|BAF18203.1| Os05g0557500 [Oryza sativa Japonica Group]	Unigene107582_All//5.00E-55//AT4G21700| unknown protein	Unigene107582_All//1.00E-117//CO096440				nr +
Unigene107584_All	308	0	0	0	0	0	0	1.9218	0.6785	0	null	null		null	null		null	null		null	null		-1.502	0.091372		-10.9082	0.00014162	Down	Unigene107584_All//sp|Q58A42|DD3_DICDI//2.00E-14//Protein DD3-3 OS=Dictyostelium discoideum GN=DD3-3 PE=2 SV=1						swissprot -
Unigene107585_All	227	0	0	0	0	0	0	3.5389	0.1841	0.351	null	null		null	null		null	null		null	null		-4.2647	8.4804e-05	Down	-3.3338	0.00024681	Down
Unigene107598_All	252	0	0	0	0	0	0	9.06	10.1172	0.1581	null	null		null	null		null	null		null	null		0.1592	0.6694		-5.8406	2.2595e-15	Down	Unigene107598_All//gi|145408590|ref|YP_001152214.1|//3.00E-14//ORF124 [Pinus koraiensis] >gi|145048839|gb|ABP35456.1| ORF124 [Pinus koraiensis]		Unigene107598_All//3.00E-38//gi|11208796|gb|BF277726.1|BF277726				nr +
Unigene1076_All	1674	0.1563	3.2085	1.0815	4.1958	6.3975	4.8563	1.9953	14.1816	0.357	4.3595	4.148e-24	Up	2.7906	8.6372e-06	Up	0.6086	0.00022305		0.2109	0.37521		2.8293	1.341e-89	Up	-2.4826	5.8538e-12	Down	Unigene1076_All//gi|57229665|gb|AAW45741.1|//1.00E-179//sinapyl alcohol dehydrogenase-like protein [Populus tremula x Populus tremuloides]	Unigene1076_All//2.00E-111//AT4G37970| CAD6 (CINNAMYL ALCOHOL DEHYDROGENASE 6); binding / catalytic/ oxidoreductase/ zinc ion binding	Unigene1076_All//0.00E+00//TC154710		ko00940|Phenylpropanoid biosynthesis		nr +
Unigene10760_All	452	0	0	0	0	0	0	5.0512	2.5891	0.617	null	null		null	null		null	null		null	null		-0.9642	0.010894		-3.0333	3.2183e-10	Down			Unigene10760_All//2.00E-19//TC149074
Unigene107612_All	295	0	0	0	0	0	0	1.7199	0	0	null	null		null	null		null	null		null	null		-10.7481	0.00089075	Down	-10.7481	0.00055583	Down	Unigene107612_All//gi|255085060|ref|XP_002504961.1|//7.00E-10//COMPASS/Set1C complex protein [Micromonas sp. RCC299] >gi|226520230|gb|ACO66219.1| COMPASS/Set1C complex protein [Micromonas sp. RCC299]				ko03040|Spliceosome		nr +
Unigene107615_All	252	0	0	0	0.1977	0.1366	0	2.3489	0	0.1581	null	null		null	null		-0.5334	0.82833		-7.6272	0.64506		-11.1978	0.00023961	Down	-3.8931	0.0010954		Unigene107615_All//gi|224136035|ref|XP_002322223.1|//3.00E-26//sulfate/bicarbonate/oxalate exchanger and transporter sat-1 [Populus trichocarpa] >gi|222869219|gb|EEF06350.1| sulfate/bicarbonate/oxalate exchanger and transporter sat-1 [Populus trichocarpa]	Unigene107615_All//2.00E-22//AT5G50300| xanthine/uracil/vitamin C permease family protein					nr +
Unigene107622_All	243	0.2153	1.2511	0	0	0.1417	0	2.0879	0	0	2.5388	0.15107		-7.7502	0.63238		7.1467	0.83845		null	null		-11.0278	0.00089072	Down	-11.0278	0.00055581	Down			Unigene107622_All//2.00E-14//FL577038
Unigene10764_All	464	0	0	0	2.684	1.1874	0.4867	0.1822	0	1.202	null	null		null	null		-1.1766	0.042273		-2.4633	0.00041499	Down	-7.5094	0.40679		2.7218	0.0093847		Unigene10764_All//gi|297834560|ref|XP_002885162.1|//6.00E-24//nodulin MtN3 family protein [Arabidopsis lyrata subsp. lyrata] >gi|297331002|gb|EFH61421.1| nodulin MtN3 family protein [Arabidopsis lyrata subsp. lyrata]	Unigene10764_All//3.00E-24//AT3G16690| nodulin MtN3 family protein				GO:0031224	nr -
Unigene107652_All	239	0	0	0	0	0	0	1.4152	0.8744	10.3347	null	null		null	null		null	null		null	null		-0.6946	0.5779		2.8684	2.9506e-10	Up
Unigene107656_All	1286	0	0	0	0	0	0	3.9453	1.2675	0.3098	null	null		null	null		null	null		null	null		-1.6381	2.4889e-10	Down	-3.6707	8.1336e-26	Down	Unigene107656_All//gi|1706590|sp|P50257.1|EF1AS_PORPU//1.00E-102//RecName: Full=Elongation factor 1-alpha S; Short=EF-1-alpha S; AltName: Full=Sporophyte-specific EF-1-alpha >gi|476149|gb|AAA61790.1| EF1-alpha [Porphyra purpurea]	Unigene107656_All//2.00E-123//AT5G60390| elongation factor 1-alpha / EF-1-alpha	Unigene107656_All//1.00E-13//BF275715				nr -
Unigene107659_All	247	37.2812	8.2056	21.9899	7.8654	10.7349	6.9482	1.1982	0.3384	0	-2.1838	1.3793e-21	Down	-0.7616	0.00011036		0.4487	0.28245		-0.1789	0.70227		-1.8241	0.21111		-10.2267	0.015878		Unigene107659_All//gi|210061121|gb|ACJ05633.1|//5.00E-10//squalene epoxidase 1 [Nigella sativa]	Unigene107659_All//7.00E-05//AT5G24160| SQE6 (SQUALENE MONOXYGENASE 6); FAD binding / oxidoreductase/ squalene monooxygenase	Unigene107659_All//1.00E-58//CO083658		ko00100|Steroid biosynthesis		nr +
Unigene107661_All	960	0	0	0	0	0	0	3.7876	0	3.5689	null	null		null	null		null	null		null	null		-11.8871	1.0147e-25	Down	-0.0858	0.76567		Unigene107661_All//gi|225442485|ref|XP_002278313.1|//2.00E-86//PREDICTED: similar to PDR8/PEN3 (PLEIOTROPIC DRUG RESISTANCE8); ATPase, coupled to transmembrane movement of substances / cadmium ion transmembrane transporter [Vitis vinifera]	Unigene107661_All//5.00E-70//AT1G15210| PDR7 (PLEIOTROPIC DRUG RESISTANCE 7); ATPase, coupled to transmembrane movement of substances					nr -
Unigene107663_All	385	0	0	0	0	0	0	6.3695	1.3027	0.3104	null	null		null	null		null	null		null	null		-2.2897	6.2007e-08	Down	-4.359	2.222e-14	Down	Unigene107663_All//gi|11466301|ref|NP_051129.1|//2.00E-20//cytochrome c oxidase subunit 3 [Cafeteria roenbergensis] >gi|6180083|gb|AAF05780.1|AF193903_3 cytochrome c oxidase subunit 3 [Cafeteria roenbergensis]	Unigene107663_All//1.00E-07//ATMG00730| Encodes cytochrome c oxidase subunit 3.			ko00190|Oxidative phosphorylation		nr -
Unigene107669_All	283	0	0	0	0	0	0	2.0916	0.5908	0	null	null		null	null		null	null		null	null		-1.8239	0.047187		-11.0304	0.00014161	Down
Unigene107673_All	426	0	0.3568	0	0.3508	0.1617	0.212	1.985	0.1962	0.7481	8.479	0.23646		null	null		-1.1173	0.58487		-0.7266	0.71666		-3.3387	0.00025152	Down	-1.4078	0.037004
Unigene107684_All	626	0	0	0	0	0.165	0	2.0262	0.4006	0.4455	null	null		null	null		7.3663	0.45821		null	null		-2.3385	0.00015567	Down	-2.1853	0.00019703	Down	Unigene107684_All//gi|108710987|gb|ABF98782.1|//2.00E-17//expressed protein [Oryza sativa (japonica cultivar-group)]	Unigene107684_All//5.00E-33//AT5G42655| FUNCTIONS IN: molecular_function unknown; INVOLVED IN: biological_process unknown; LOCATED IN: cellular_component unknown; BEST Arabidopsis thaliana protein match is: disease resistance-responsive family protein (TAIR:AT5G42500.1); Has 121 Blast hits to 121 proteins in 14 species: Archae - 0; Bacteria - 0; Metazoa - 0; Fungi - 0; Plants - 121; Viruses - 0; …	Unigene107684_All//9.00E-25//gi|21098523|gb|BQ410848.1|BQ410848				nr +
Unigene107688_All	233	0	0	0	0	0	0	6.8955	2.6907	0.8549	null	null		null	null		null	null		null	null		-1.3577	0.0044672		-3.0118	2.3571e-07	Down	Unigene107688_All//gi|4139170|gb|AAD03711.1|//2.00E-38//elongation translation factor 1 alpha [Cyanophora paradoxa]	Unigene107688_All//5.00E-36//AT5G60390| elongation factor 1-alpha / EF-1-alpha	Unigene107688_All//1.00E-43//TC166357				nr -
Unigene10769_All	436	0	6.9729	2.9312	0	0	0	0	0	0	12.7675	2.6747e-17	Up	11.5173	4.69e-07	Up	null	null		null	null		null	null		null	null		Unigene10769_All//sp|P06002|OPS1_DROME//2.00E-40//Opsin Rh1 OS=Drosophila melanogaster GN=ninaE PE=1 SV=1						swissprot -
Unigene107690_All	312	0	0	0	0	0	0	2.4392	0.4019	0	null	null		null	null		null	null		null	null		-2.6015	0.0028105		-11.2522	8.8873e-06	Down	Unigene107690_All//gi|300263896|gb|EFJ48094.1|//6.00E-33//component of cytosolic 80S ribosome and 60S large subunit [Volvox carteri f. nagariensis]	Unigene107690_All//3.00E-30//AT3G13580| 60S ribosomal protein L7 (RPL7D)	Unigene107690_All//4.00E-07//gi|21100940|gb|BQ413253.1|BQ413253		ko03010|Ribosome		nr -
Unigene107693_All	398	0	0	0	0	0	0	25.9205	39.5904	151.147	null	null		null	null		null	null		null	null		0.6111	1.0423e-06		2.5438	4.8762e-205	Up	Unigene107693_All//gi|224127083|ref|XP_002329388.1|//2.00E-08//predicted protein [Populus trichocarpa] >gi|222870438|gb|EEF07569.1| predicted protein [Populus trichocarpa]		Unigene107693_All//4.00E-78//TC175720				nr +
Unigene107695_All	356	0	0	0	0	0	0	1.6627	0.7044	0	null	null		null	null		null	null		null	null		-1.2391	0.15438		-10.6993	0.00014161	Down	Unigene107695_All//gi|300123728|emb|CBK25000.2|//5.00E-24//Ribosomal protein L18a [Blastocystis hominis] >gi|300175241|emb|CBK20552.2| Ribosomal protein L18a [Blastocystis hominis]	Unigene107695_All//1.00E-17//AT2G34480| 60S ribosomal protein L18A (RPL18aB)			ko03010|Ribosome		nr -
Unigene1077_All	584	0.6271	0.6941	3.8296	1.8766	1.4151	0.8507	0.9412	0.2147	0.7504	0.1464	0.89839		2.6104	1.4047e-06	Up	-0.4072	0.56058		-1.1414	0.087407		-2.1322	0.033168		-0.3268	0.67185		Unigene1077_All//gi|224089188|ref|XP_002308654.1|//2.00E-06//predicted protein [Populus trichocarpa] >gi|222854630|gb|EEE92177.1| predicted protein [Populus trichocarpa]		Unigene1077_All//6.00E-146//gi|78350462|gb|DT570736.1|DT570736				nr -
Unigene107708_All	558	0	1.1805	0.2863	0.1785	0.1851	0.6475	0.1515	0.2247	0.0714	10.2052	0.00062593	Up	8.1614	0.23975		0.0524	0.96804		1.859	0.21965		0.5687	0.78301		-1.0853	0.67746		Unigene107708_All//gi|224134959|ref|XP_002327532.1|//6.00E-13//f-box family protein [Populus trichocarpa] >gi|222836086|gb|EEE74507.1| f-box family protein [Populus trichocarpa]		Unigene107708_All//0.00E+00//TC178035				nr +
Unigene10771_All	321	0	0.9471	1.1612	0	0.1073	0	115.381	321.606	385.107	9.8874	0.044461		10.1814	0.025045		6.7455	0.83835		null	null		1.4789	3.9446e-168	Up	1.7388	2.8689e-259	Up	Unigene10771_All//gi|197312909|gb|ACH63235.1|//2.00E-37//alcohol dehydrogenase [Rheum australe]	Unigene10771_All//3.00E-35//AT3G24503| ALDH2C4; 3-chloroallyl aldehyde dehydrogenase/ aldehyde dehydrogenase (NAD)/ coniferyl-aldehyde dehydrogenase	Unigene10771_All//8.00E-36//gi|13355011|gb|BG445359.1|BG445359		ko00940|Phenylpropanoid biosynthesis//ko00010|Glycolysis / Gluconeogenesis//ko00903|Limonene and pinene degradation//ko00620|Pyruvate metabolism//ko00380|Tryptophan metabolism//ko00071|Fatty acid metabolism//ko00053|Ascorbate and aldarate metabolism//ko00330|Arginine and proline metabolism//ko00280|Valine, leucine and isoleucine degradation//ko00640|Propanoate metabolism//ko00561|Glycerolipid met…	GO:0004030//GO:0009698	nr -
Unigene107727_All	211	13.3902	12.4873	34.827	30.219	23.0113	29.3241	1.603	2.1789	1.8881	-0.1007	0.77743		1.379	4.4998e-09	Up	-0.3931	0.091739		-0.0434	0.87911		0.4428	0.63165		0.2362	0.80458				Unigene107727_All//3.00E-37//TC163844
Unigene107728_All	322	0	0	0	0	0	0	2.4948	0.649	0	null	null		null	null		null	null		null	null		-1.9426	0.011712		-11.2847	4.4328e-06	Down							ESTscan -
Unigene10774_All	490	0.1068	0.4136	0.9781	1.6266	6.3248	4.885	0.0863	0.0853	0	1.9533	0.37563		3.1951	0.034796		1.9592	1.9153e-07	Up	1.5865	0.00024101	Up	-0.0168	1.0061		-6.4313	0.61694
Unigene107743_All	926	0	0	0	0.1076	0	0.1951	7.0771	0.5416	1.1186	null	null		null	null		-6.7495	0.3169		0.8585	0.69611		-3.7079	2.726e-32	Down	-2.6615	1.612e-24	Down	Unigene107743_All//sp|Q5VU43|MYOME_HUMAN//7.00E-07//Myomegalin OS=Homo sapiens GN=PDE4DIP PE=2 SV=1		Unigene107743_All//2.00E-125//TC161176				swissprot +
Unigene107753_All	1494	0	0	0	0	0	0	4.4714	1.147	0.48	null	null		null	null		null	null		null	null		-1.9629	6.477e-17	Down	-3.2196	3.4542e-30	Down	Unigene107753_All//gi|8928433|sp|Q9ZSW1.1|TBB1_CYAPA//0.00E+00//RecName: Full=Tubulin beta-1 chain; AltName: Full=Beta-1-tubulin >gi|4139172|gb|AAD03712.1| beta 1 tubulin [Cyanophora paradoxa]	Unigene107753_All//0.00E+00//AT5G12250| TUB6 (BETA-6 TUBULIN); structural constituent of cytoskeleton	Unigene107753_All//2.00E-43//TC130221		ko04145|Phagosome		nr +
Unigene107754_All	245	0	2.6886	4.3469	6.913	34.1542	44.426	0.3451	0	0.3252	11.3926	0.0006259	Up	12.0858	6.6268e-06	Up	2.3047	8.1776e-24	Up	2.684	5.2687e-34	Up	-8.4309	0.40676		-0.0857	0.97353		Unigene107754_All//gi|30725324|gb|AAP37684.1|//2.00E-13//At3g01680 [Arabidopsis thaliana]	Unigene107754_All//9.00E-15//AT3G01680| unknown protein	Unigene107754_All//6.00E-101//TC134810				nr +
Unigene107757_All	360	0	0	0	0	0	0	3.2885	1.0449	0.4427	null	null		null	null		null	null		null	null		-1.6541	0.0050289		-2.893	2.0306e-05	Down	Unigene107757_All//gi|29539344|dbj|BAC67673.1|//8.00E-32//ribosomal protein S8 [Cyanidioschyzon merolae]	Unigene107757_All//1.00E-32//AT5G20290| 40S ribosomal protein S8 (RPS8A)			ko03010|Ribosome		nr -
Unigene10776_All	223	0	6.5893	1.1939	0	0.3088	0	0	0	0	12.6859	2.1121e-08	Up	10.2215	0.080347		8.2705	0.61525		null	null		null	null		null	null
Unigene107764_All	1104	0.0948	0	0.0965	0.6317	0.4679	0.1636	4.0212	0.5679	0.1443	-6.5668	0.37628		0.0256	1.0016		-0.433	0.6063		-1.9491	0.039089		-2.8239	2.7156e-17	Down	-4.8005	4.4612e-27	Down	Unigene107764_All//gi|224069166|ref|XP_002302916.1|//1.00E-104//GRAS family protein [Populus trichocarpa] >gi|222844642|gb|EEE82189.1| GRAS family protein [Populus trichocarpa]	Unigene107764_All//3.00E-89//AT4G08250| scarecrow transcription factor family protein	Unigene107764_All//0.00E+00//gi|21099408|gb|BQ411721.1|BQ411721	GRAS			nr -
Unigene10777_All	243	0.2153	0	0	6.5599	2.2673	0	0	0	0	-7.7502	0.61956		-7.7502	0.63228		-1.5327	0.0024417		-12.6795	5.794e-10	Down	null	null		null	null
Unigene107771_All	222	0	0	0	0	0	0	2.2854	0.3765	0	null	null		null	null		null	null		null	null		-2.6017	0.020488		-11.1582	0.00055579	Down							ESTscan +
Unigene107772_All	300	0	0	0	0	0	0	3.9462	0.6966	0	null	null		null	null		null	null		null	null		-2.5021	0.00014683	Down	-11.9462	8.1507e-09	Down
Unigene107775_All	241	0.6513	0.6307	0.8838	1.4469	1.8575	1.3118	1.7544	0.3469	6.4469	-0.0464	0.98957		0.4404	0.77578		0.3604	0.80659		-0.1414	0.91231		-2.3384	0.054696		1.8776	0.00020675	Up	Unigene107775_All//gi|212717129|gb|ACJ37406.1|//9.00E-13//stress-induced receptor-like kinase [Glycine max]	Unigene107775_All//7.00E-05//AT4G32300| SD2-5 (S-DOMAIN-2 5); carbohydrate binding / kinase/ protein kinase	Unigene107775_All//3.00E-75//ES826968				nr +
Unigene107776_All	318	0	0	0	0	0	0	1.8614	1.0515	0	null	null		null	null		null	null		null	null		-0.8239	0.34834		-10.8622	0.0001416	Down	Unigene107776_All//gi|192910756|gb|ACF06486.1|//6.00E-35//60S ribosomal protein L11 [Elaeis guineensis] >gi|192910758|gb|ACF06487.1| 60S ribosomal protein L11 [Elaeis guineensis]	Unigene107776_All//7.00E-25//AT5G45775| 60S ribosomal protein L11 (RPL11D)	Unigene107776_All//1.00E-09//TC154176		ko03010|Ribosome		nr -
Unigene107779_All	238	0	0	0	0	0	0	2.8424	0	0	null	null		null	null		null	null		null	null		-11.4729	6.3456e-05	Down	-11.4729	3.5687e-05	Down							ESTscan +
Unigene107790_All	347	0.4523	1.7523	0.9207	0.4307	0	0.2603	4.0209	0.3613	0.4592	1.9539	0.06038		1.0255	0.47126		-8.7505	0.16632		-0.7265	0.71665		-3.4762	5.7955e-07	Down	-3.1303	1.0852e-06	Down			Unigene107790_All//1.00E-47//TC138513
Unigene107793_All	231	0	0	0	0	0	0	2.9285	0.5428	0	null	null		null	null		null	null		null	null		-2.4317	0.007767		-11.5159	3.5685e-05	Down	Unigene107793_All//gi|15224284|ref|NP_181874.1|//4.00E-15//60S ribosomal protein L38 (RPL38A) [Arabidopsis thaliana] >gi|15231705|ref|NP_191513.1| 60S ribosomal protein L38 (RPL38B) [Arabidopsis thaliana] >gi|297820788|ref|XP_002878277.1| 60S ribosomal protein L38 [Arabidopsis lyrata subsp. lyrata] >gi|297828045|ref|XP_002881905.1| 60S ribosomal protein L38 [Arabidopsis lyrata subsp. lyrata] >gi|…	Unigene107793_All//2.00E-16//AT3G59540| 60S ribosomal protein L38 (RPL38B)			ko03010|Ribosome		nr -
Unigene107803_All	446	0	0	0	0	0	0	12.1342	3.0925	0.9826	null	null		null	null		null	null		null	null		-1.9722	6.324e-14	Down	-3.6263	3.1446e-27	Down	Unigene107803_All//gi|18076136|emb|CAC80486.1|//5.00E-49//cytochrome oxidase subunit I [Musa acuminata]	Unigene107803_All//1.00E-46//ATMG01360| cytochrome c oxidase subunit 1	Unigene107803_All//3.00E-08//EX172657		ko00190|Oxidative phosphorylation		nr -
Unigene10781_All	470	0.4453	2.4796	1.3596	5.5114	3.4435	2.7867	0.8096	0.7114	0.3391	2.4773	0.00097961	Up	1.6103	0.11098		-0.6785	0.073737		-0.9839	0.011991		-0.1865	0.85743		-1.2555	0.24822		Unigene10781_All//gi|297846424|ref|XP_002891093.1|//1.00E-55//phosphatidylinositol-4-phosphate 5-kinase family protein [Arabidopsis lyrata subsp. lyrata] >gi|297336935|gb|EFH67352.1| phosphatidylinositol-4-phosphate 5-kinase family protein [Arabidopsis lyrata subsp. lyrata]	Unigene10781_All//9.00E-44//AT1G34260| phosphatidylinositol-4-phosphate 5-kinase family protein	Unigene10781_All//5.00E-75//CA993882		ko04145|Phagosome//ko04144|Endocytosis//ko04070|Phosphatidylinositol signaling system//ko00562|Inositol phosphate metabolism	GO:0016307//GO:0019538//GO:0030384//GO:0032559	nr +
Unigene107810_All	442	0	0	0	0	0	0.1022	1.5305	1.4184	0.0901	null	null		null	null		null	null		6.6753	0.70269		-0.1097	0.89033		-4.0863	0.00031029	Down
Unigene10782_All	546	0	0	0	0	0	0	2.0133	2.373	0	null	null		null	null		null	null		null	null		0.2371	0.6518		-10.9753	3.3306e-08	Down	Unigene10782_All//gi|297829134|ref|XP_002882449.1|//6.00E-25//dual specificity protein phosphatase family protein [Arabidopsis lyrata subsp. lyrata] >gi|297328289|gb|EFH58708.1| dual specificity protein phosphatase family protein [Arabidopsis lyrata subsp. lyrata]	Unigene10782_All//1.00E-25//AT3G06110| MKP2 (MAPK PHOSPHATASE 2); MAP kinase phosphatase/ protein tyrosine/serine/threonine phosphatase				GO:0004721//GO:0005515//GO:0016020//GO:0042221//GO:0043231//GO:0043405	nr +
Unigene107820_All	409	0	0	0	0.2436	0	0	1.654	0.1022	0.3896	null	null		null	null		-7.9284	0.31688		-7.9284	0.40529		-4.0165	0.0005363	Down	-2.0859	0.01266
Unigene107821_All	255	0	0	0	0	0	0	2.3213	0.4917	0	null	null		null	null		null	null		null	null		-2.2391	0.020708		-11.1807	0.00014159	Down
Unigene107826_All	296	0.5303	0.1712	0.8995	2.1878	0.2327	0	0.857	0	0	-1.6311	0.48904		0.7623	0.64415		-3.2329	0.0024856		-11.0953	0.00038987	Down	-9.7432	0.040588		-9.7432	0.03056		Unigene107826_All//gi|73921149|sp|Q9LV66.1|Y5848_ARATH//6.00E-06//RecName: Full=Uncharacterized protein At5g48480	Unigene107826_All//2.00E-07//AT5G48480| unknown protein	Unigene107826_All//1.00E-77//TC151304				nr +
Unigene107828_All	269	0.778	0	0	0.1852	0	0	2.0433	0	0	-9.6036	0.12259		-9.6036	0.14658		-7.5329	0.56333		-7.5329	0.64485		-10.9967	0.00046192	Down	-10.9967	0.00028115	Down
Unigene10783_All	469	0	8.2108	2.3843	0	0	0	0	0	0	13.0033	6.3252e-22	Up	11.2194	3.435e-06	Up	null	null		null	null		null	null		null	null								ESTscan +
Unigene107837_All	230	0	0	0	0	0	0	2.7574	0.7269	0	null	null		null	null		null	null		null	null		-1.9235	0.03095		-11.4291	7.1239e-05	Down			Unigene107837_All//7.00E-17//TC147981
Unigene107838_All	266	0	0	0	0	0	0	2.3842	0	0.5991	null	null		null	null		null	null		null	null		-11.2193	0.00012353	Down	-1.9926	0.020382
Unigene10784_All	367	7.4133	3.4516	2.4666	4.7507	2.8149	1.8459	1.8433	1.1388	1.6283	-1.1029	0.0042588		-1.5876	0.00017244	Down	-0.7551	0.1148		-1.3638	0.0069748		-0.6948	0.39396		-0.1789	0.7942				Unigene10784_All//8.00E-166//TC171472
Unigene10785_All	343	0	0.2954	0	0	0	0	0.7396	2.8026	5.5751	8.2065	0.39034		null	null		null	null		null	null		1.9219	0.0054194		2.9142	3.2547e-08	Up
Unigene107856_All	410	0	0	0	0	0	0	1.7531	0.4078	0.1943	null	null		null	null		null	null		null	null		-2.104	0.012462		-3.1736	0.00080949	Down	Unigene107856_All//gi|300259453|gb|EFJ43680.1|//2.00E-17//component of cytosolic 80S ribosome and 40S small subunit [Volvox carteri f. nagariensis]	Unigene107856_All//2.00E-14//AT4G25740| 40S ribosomal protein S10 (RPS10A)			ko03010|Ribosome		nr -
Unigene10786_All	360	2.0347	1.4075	1.1833	1.107	0.1913	1.5054	0.2349	6.8499	2.7666	-0.5317	0.51262		-0.782	0.38008		-2.5327	0.057984		0.4435	0.67807		4.866	1.0416e-14	Up	3.558	2.4339e-05	Up	Unigene10786_All//gi|297804080|ref|XP_002869924.1|//1.00E-25//FAD-binding domain-containing protein [Arabidopsis lyrata subsp. lyrata] >gi|297315760|gb|EFH46183.1| FAD-binding domain-containing protein [Arabidopsis lyrata subsp. lyrata]	Unigene10786_All//1.00E-22//AT4G20840| FAD-binding domain-containing protein	Unigene10786_All//3.00E-23//TC163182			GO:0005576//GO:0005618//GO:0006950//GO:0016020//GO:0016491//GO:0043231	nr -
Unigene10787_All	402	0	0	0	0	0	0	3.3656	3.6389	0.1982	null	null		null	null		null	null		null	null		0.1126	0.8229		-4.0858	7.0694e-08	Down	Unigene10787_All//gi|195619738|gb|ACG31699.1|//5.00E-32//60S ribosomal protein L4 [Zea mays]	Unigene10787_All//6.00E-28//AT3G09630| 60S ribosomal protein L4/L1 (RPL4A)			ko03010|Ribosome	GO:0005622	nr -
Unigene107876_All	388	0	0	0	0	0	0	1.8525	1.7235	0	null	null		null	null		null	null		null	null		-0.1041	0.89343		-10.8553	1.7827e-05	Down			Unigene107876_All//6.00E-145//ES842468
Unigene107882_All	228	0	0	0	0	0	0	6.4904	1.4665	8.5618	null	null		null	null		null	null		null	null		-2.1459	9.6879e-05	Down	0.3996	0.34086		Unigene107882_All//gi|125887|sp|P13447.1|LAT52_SOLLC//2.00E-10//RecName: Full=Anther-specific protein LAT52; Flags: Precursor >gi|295812|emb|CAA33854.1| LAT52 [Solanum lycopersicum]	Unigene107882_All//1.00E-08//AT4G18596| pollen Ole e 1 allergen and extensin family protein	Unigene107882_All//5.00E-67//TC149258				nr +
Unigene107889_All	237	0	0	0	3.1528	1.5983	0.1906	1.0704	0.7054	0.6724	null	null		null	null		-0.9801	0.22274		-4.048	0.00077552	Down	-0.6016	0.64823		-0.6708	0.60595
Unigene10789_All	311	0	15.3149	11.3006	0	0	0	0	0	0	13.9026	3.8276e-27	Up	13.4641	1.8745e-19	Up	null	null		null	null		null	null		null	null		Unigene10789_All//gi|1173043|sp|P46291.1|RL38_SOLLC//4.00E-25//RecName: Full=60S ribosomal protein L38 >gi|313027|emb|CAA49599.1| ribosomal protein L38 [Solanum lycopersicum] >gi|77745467|gb|ABB02632.1| ribosomal protein L38-like [Solanum tuberosum]	Unigene10789_All//2.00E-15//AT3G59540| 60S ribosomal protein L38 (RPL38B)			ko03010|Ribosome	GO:0005198//GO:0010467//GO:0015934//GO:0022613	nr +
Unigene107893_All	247	0	0	0	0.2017	0	0	2.0541	0	0.9677	null	null		null	null		-7.6561	0.5633		-7.6561	0.6448		-11.0043	0.00089068	Down	-1.0859	0.22834		Unigene107893_All//gi|4206110|gb|AAD11424.1|//5.00E-07//cytochrome [Mesembryanthemum crystallinum]						nr -
Unigene107897_All	448	0	0	0	0	0	0	1.6044	0	0.0889	null	null		null	null		null	null		null	null		-10.6478	3.268e-05	Down	-4.1737	0.00016451	Down							ESTscan -
Unigene1079_All	2873	29.3747	22.5041	24.1506	29.6666	19.3691	14.4309	74.4061	71.0076	26.7486	-0.3844	8.5048e-12		-0.2825	1.2671e-06		-0.6151	8.9154e-33		-1.0397	3.2693e-71	Down	-0.0674	0.051593		-1.476	0	Down	Unigene1079_All//gi|187940724|gb|ACD39463.1|//1.00E-170//BEL30 protein [Solanum etuberosum]	Unigene1079_All//5.00E-117//AT4G34610| BLH6 (BELL1-LIKE HOMEODOMAIN 6); DNA binding / transcription factor	Unigene1079_All//0.00E+00//TC144172	HB		GO:0001071//GO:0003677//GO:0006351//GO:0010468//GO:0043231	nr +
Unigene107904_All	393	0	0	0.1355	0	0	0	2.1517	0.2127	0.2027	null	null		7.0821	0.64074		null	null		null	null		-3.3386	0.00025151	Down	-3.4081	0.00013526	Down
Unigene107918_All	273	0	0	0	0.1825	0	0.3309	1.8585	0	0.1459	null	null		null	null		-7.5118	0.56329		0.8585	0.79669		-10.8599	0.00089064	Down	-3.6711	0.0037536				Unigene107918_All//8.00E-119//TC143380
Unigene107919_All	238	0	0	0	0	0.1447	0	3.02	0.1756	0.6696	null	null		null	null		7.1769	0.83824		null	null		-4.1042	0.00029146	Down	-2.1732	0.0077581
Unigene107926_All	633	0.248	0.2401	0.3365	0.4722	0.272	0	1.6698	0.9904	0.1888	-0.0467	0.98956		0.4403	0.77577		-0.7958	0.55705		-8.8833	0.040078		-0.7536	0.2167		-3.1447	2.9652e-05	Down	Unigene107926_All//gi|108864366|gb|ABA93633.2|//8.00E-08//Protein kinase domain containing protein, expressed [Oryza sativa (japonica cultivar-group)]						nr +
Unigene107934_All	529	0	0	0.2013	0.7533	0.0651	0.1708	2.2379	0.395	0.3012	null	null		7.6532	0.40197		-3.5325	0.020963		-2.1409	0.12642		-2.5022	0.00014682	Down	-2.8934	2.0305e-05	Down
Unigene10794_All	358	1.023	5.9445	5.0573	0.1391	1.2504	0.3785	1.5353	0.5837	0	2.5387	2.1528e-06	Up	2.3056	8.143e-05	Up	3.1682	0.039535		1.4442	0.63942		-1.3952	0.13454		-10.5843	0.00028114	Down		Unigene10794_All//3.00E-05//AT3G53880| aldo/keto reductase family protein	Unigene10794_All//3.00E-14//gi|48805189|gb|CO106503.1|CO106503
Unigene107942_All	296	0	0	0	0	0	0	2.1426	0	0.1346	null	null		null	null		null	null		null	null		-11.0651	0.00012352	Down	-3.9926	0.00058253	Down
Unigene107947_All	224	0.7007	0	0	1.7791	0.4612	0	2.8313	0.1866	0.1779	-9.4527	0.21668		-9.4527	0.24612		-1.9477	0.119		-10.7969	0.011128		-3.9234	0.00098124	Down	-3.9923	0.00058251	Down
Unigene10795_All	445	0.3527	0	0	5.4852	4.256	0.9134	1.2352	0.1878	0.1791	-8.4623	0.21668		-8.4623	0.24612		-0.366	0.39101		-2.5862	6.964e-08	Down	-2.7175	0.012194		-2.7859	0.0079664		Unigene10795_All//gi|122209356|sp|Q2V3I3.1|EPFL4_ARATH//3.00E-26//RecName: Full=EPIDERMAL PATTERNING FACTOR-like protein 4; Short=EPF-like protein 4; Flags: Precursor	Unigene10795_All//1.00E-14//AT3G22820| allergen-related	Unigene10795_All//0.00E+00//CO071488			GO:0009791//GO:0009913	nr -
Unigene107956_All	336	12.7688	7.5401	16.4821	23.4245	23.7767	17.8772	34.4785	13.6831	15.4138	-0.76	0.0093328		0.3683	0.1767		0.0215	0.94546		-0.3899	0.06956		-1.3333	7.4649e-17	Down	-1.1615	3.5128e-14	Down	Unigene107956_All//gi|47026989|gb|AAT08712.1|//9.00E-13//nucleoside diphosphate kinase [Hyacinthus orientalis]	Unigene107956_All//9.00E-13//AT4G09320| NDPK1; ATP binding / nucleoside diphosphate kinase	Unigene107956_All//6.00E-74//gi|109828864|gb|DW227483.1|DW227483		ko00230|Purine metabolism//ko00240|Pyrimidine metabolism		nr -
Unigene107957_All	551	0	0	0	0.452	0.0625	0	2.4555	0.7585	0.5784	null	null		null	null		-2.8544	0.13712		-8.8202	0.073578		-1.6948	0.0019559		-2.0859	0.00018491	Down	Unigene107957_All//gi|15225548|ref|NP_182094.1|//5.00E-79//sterile alpha motif (SAM) domain-containing protein [Arabidopsis thaliana]	Unigene107957_All//3.00E-80//AT2G45700| sterile alpha motif (SAM) domain-containing protein	Unigene107957_All//0.00E+00//TC179553				nr -
Unigene107962_All	733	0	0	0	0	0	0	7.1524	0.114	0.7609	null	null		null	null		null	null		null	null		-5.9713	7.4833e-34	Down	-3.2326	6.2936e-24	Down	Unigene107962_All//gi|115474639|ref|NP_001060916.1|//4.00E-46//Os08g0129600 [Oryza sativa Japonica Group] >gi|29467527|dbj|BAC66716.1| proline-rich protein family-like [Oryza sativa Japonica Group] >gi|113622885|dbj|BAF22830.1| Os08g0129600 [Oryza sativa Japonica Group]	Unigene107962_All//3.00E-36//AT3G25690| CHUP1 (CHLOROPLAST UNUSUAL POSITIONING 1)	Unigene107962_All//1.00E-70//TC132881				nr -
Unigene107984_All	249	0	0	0	0.6002	0.5532	0	3.396	0.1679	0.16	null	null		null	null		-0.1176	0.91143		-9.2293	0.23461		-4.3382	4.5551e-05	Down	-4.4077	2.3715e-05	Down			Unigene107984_All//8.00E-51//TC140956
Unigene107989_All	624	0	0	0	0	0	0	2.4392	0.6028	0.1277	null	null		null	null		null	null		null	null		-2.0167	0.00015052	Down	-4.2556	5.2243e-09	Down			Unigene107989_All//9.00E-19//TC142576
Unigene10799_All	266	0	4.3812	2.8026	0	0	0	0	0	0	12.0971	1.0496e-06	Up	11.4526	0.00032788	Up	null	null		null	null		null	null		null	null
Unigene107998_All	448	0	0	0	0	0	0	1.51	0	0.0889	null	null		null	null		null	null		null	null		-10.5603	6.3452e-05	Down	-4.0862	0.00031028	Down	Unigene107998_All//gi|222874561|gb|EEF11692.1|//5.00E-09//predicted protein [Populus trichocarpa]						nr +
Unigene10801_All	354	0	10.5919	6.9195	0	0	0	0	0	0	13.3707	2.4025e-21	Up	12.7565	1.6423e-13	Up	null	null		null	null		null	null		null	null		Unigene10801_All//gi|255089517|ref|XP_002506680.1|//4.00E-33//ribosomal protein L37ae [Micromonas sp. RCC299] >gi|226457652|gb|EEH54951.1| ribosomal protein L37ae [Micromonas pusilla CCMP1545] >gi|226521953|gb|ACO67938.1| ribosomal protein L37ae [Micromonas sp. RCC299]	Unigene10801_All//2.00E-33//AT3G60245| 60S ribosomal protein L37a (RPL37aC)			ko03010|Ribosome	GO:0005198//GO:0010467//GO:0015934//GO:0022613//GO:0043169//GO:0043231	nr -
Unigene108015_All	404	0	0	0	0.2466	0.2557	0	5.0234	1.138	1.0847	null	null		null	null		0.0523	0.96802		-7.946	0.40521		-2.1422	3.1861e-06	Down	-2.2114	1.0544e-06	Down	Unigene108015_All//gi|224112451|ref|XP_002332774.1|//3.00E-09//cc-nbs-lrr resistance protein [Populus trichocarpa] >gi|222834669|gb|EEE73132.1| cc-nbs-lrr resistance protein [Populus trichocarpa]						nr -
Unigene108016_All	458	0	0	0	0	0	0	1.9386	0.0913	0.174	null	null		null	null		null	null		null	null		-4.4083	2.439e-05	Down	-3.4779	7.3368e-05	Down	Unigene108016_All//gi|300267685|gb|EFJ51868.1|//9.00E-14//dynein heavy chain 4 [Volvox carteri f. nagariensis]				ko04141|Protein processing in endoplasmic reticulum//ko03420|Nucleotide excision repair		nr -
Unigene108017_All	449	0	0	0	0.1109	0	0	5.0849	3.5373	0.6211	null	null		null	null		-6.7931	0.56322		-6.7931	0.64467		-0.5236	0.17668		-3.0333	3.2181e-10	Down			Unigene108017_All//6.00E-22//TC149487
Unigene108037_All	425	0	0	0	0	0	0	1.8902	0.4917	0.0937	null	null		null	null		null	null		null	null		-1.9427	0.011712		-4.3343	4.5427e-05	Down	Unigene108037_All//gi|9979193|sp|Q9ZRX0.1|TCTP_PSEMZ//4.00E-06//RecName: Full=Translationally-controlled tumor protein homolog; Short=TCTP >gi|3850844|emb|CAA10048.1| TCTP-like protein [Pseudotsuga menziesii]	Unigene108037_All//3.00E-05//AT3G16640| TCTP (TRANSLATIONALLY CONTROLLED TUMOR PROTEIN)					nr -
Unigene108040_All	461	0.227	0	0.231	0	0.747	0.1959	1.6509	0.1813	0.9506	-7.8265	0.37624		0.0252	1.0016		9.545	0.030157		7.614	0.48095		-3.1868	0.00079301	Down	-0.7963	0.2519		Unigene108040_All//gi|145358569|ref|NP_198529.3|//1.00E-17//binding [Arabidopsis thaliana]	Unigene108040_All//7.00E-14//AT5G37130| binding	Unigene108040_All//2.00E-163//TC134980				nr -
Unigene108046_All	383	0.1366	1.1907	0.5561	0.1301	0.1798	0	0.3312	0.1091	2.3924	3.1238	0.035825		2.0254	0.36183		0.4668	0.96088		-7.0235	0.64464		-1.6021	0.53525		2.8527	0.00031795	Up	Unigene108046_All//gi|15222311|ref|NP_172195.1|//1.00E-18//MAPKKK13; ATP binding / kinase/ protein kinase/ protein serine/threonine kinase [Arabidopsis thaliana] >gi|8954031|gb|AAF82205.1|AC067971_13 Strong similarity to a protein kinase homolog F23F1.4 gi|7488253 from Arabidopsis thaliana BAC F23F1 gb|AC004680. It contains a eukaryotic protein kinase domain PF|00069. ESTs gb|F13903 and gb|F13904…	Unigene108046_All//6.00E-20//AT1G07150| MAPKKK13; ATP binding / kinase/ protein kinase/ protein serine/threonine kinase	Unigene108046_All//2.00E-142//TC161841				nr +
Unigene108050_All	491	0	0	0	0	0	0	5.3388	0.2554	0.6491	null	null		null	null		null	null		null	null		-4.3857	8.1346e-15	Down	-3.04	1.1869e-11	Down	Unigene108050_All//gi|226496173|ref|NP_001152735.1|//7.00E-06//phytosulfokines 4 [Zea mays] >gi|195659479|gb|ACG49207.1| phytosulfokines 4 precursor [Zea mays]	Unigene108050_All//2.00E-05//AT3G49780| ATPSK4 (PHYTOSULFOKINE 4 PRECURSOR); growth factor					nr -
Unigene108057_All	300	0	0	0	0.3321	0	0	6.342	5.8514	0.664	null	null		null	null		-8.3755	0.31681		-8.3755	0.40521		-0.1162	0.78902		-3.2557	3.5862e-09	Down			Unigene108057_All//1.00E-19//TC134836
Unigene108058_All	224	0	0	0	0	0	0.2016	3.02	1.6793	0	null	null		null	null		null	null		7.6554	0.70261		-0.8467	0.28846		-11.5603	3.5684e-05	Down			Unigene108058_All//3.00E-07//EX169661
Unigene10806_All	231	0	3.2902	4.3799	0	0	0	0	0	0	11.684	0.0001767	Up	12.0967	1.275e-05	Up	null	null		null	null		null	null		null	null		Unigene10806_All//sp|O00322|UPK1A_HUMAN//1.00E-12//Uroplakin-1a OS=Homo sapiens GN=UPK1A PE=2 SV=1						swissprot +
Unigene108067_All	335	0	0	0	0	0	0	2.1456	0	0.3568	null	null		null	null		null	null		null	null		-11.0672	3.2678e-05	Down	-2.5882	0.002814		Unigene108067_All//sp|Q8BP40|PPA6_MOUSE//3.00E-06//Lysophosphatidic acid phosphatase type 6 OS=Mus musculus GN=Acp6 PE=2 SV=1						swissprot +
Unigene108076_All	333	0	0	0	0	0	0	2.6663	0.3765	0	null	null		null	null		null	null		null	null		-2.8241	0.00056502	Down	-11.3806	1.1019e-06	Down			Unigene108076_All//4.00E-07//gi|48746449|gb|CO076968.1|CO076968
Unigene108087_All	294	0	0	0	0	0	0	2.0133	0.853	0	null	null		null	null		null	null		null	null		-1.2389	0.15438		-10.9753	0.00014159	Down	Unigene108087_All//gi|223994173|ref|XP_002286770.1|//4.00E-10//udp-d-glucose 6-dehydrogenase [Thalassiosira pseudonana CCMP1335] >gi|220978085|gb|EED96411.1| udp-d-glucose 6-dehydrogenase [Thalassiosira pseudonana CCMP1335]				ko00500|Starch and sucrose metabolism//ko00520|Amino sugar and nucleotide sugar metabolism//ko00053|Ascorbate and aldarate metabolism//ko00040|Pentose and glucuronate interconversions		nr -
Unigene108089_All	428	0	0	0	0	0	0	2.5684	0.293	0	null	null		null	null		null	null		null	null		-3.1319	3.4657e-05	Down	-11.3267	3.3305e-08	Down	Unigene108089_All//gi|297829496|ref|XP_002882630.1|//1.00E-21//60S ribosomal protein L4/L1 [Arabidopsis lyrata subsp. lyrata] >gi|297328470|gb|EFH58889.1| 60S ribosomal protein L4/L1 [Arabidopsis lyrata subsp. lyrata]	Unigene108089_All//4.00E-22//AT3G09630| 60S ribosomal protein L4/L1 (RPL4A)			ko03010|Ribosome		nr -
Unigene10809_All	356	0	0	0	0	0	0	9.7387	6.692	0.2238	null	null		null	null		null	null		null	null		-0.5413	0.071912		-5.4434	1.52e-22	Down			Unigene10809_All//8.00E-27//gi|109850443|gb|DW479422.1|DW479422
Unigene108104_All	595	0.1759	0.9367	0.537	0.2512	0.1736	0.1518	3.4108	1.1942	0.6696	2.4128	0.039315		1.6102	0.30505		-0.5331	0.78579		-0.7267	0.71664		-1.5141	0.00034987	Down	-2.3487	3.7993e-07	Down
Unigene108108_All	662	0	0	0	0	0	0	6.1951	1.7678	0	null	null		null	null		null	null		null	null		-1.8092	1.2077e-09	Down	-12.5969	3.7404e-30	Down			Unigene108108_All//2.00E-35//TC175328
Unigene108114_All	262	30.7535	15.0848	12.3979	19.9637	13.8004	12.2389	2.0979	74.9771	0.6082	-1.0277	8.4549e-07	Down	-1.3107	3.6121e-09	Down	-0.5327	0.034866		-0.7059	0.0062904		5.1594	3.3343e-118	Up	-1.7863	0.050679		Unigene108114_All//gi|146148631|gb|ABQ02258.1|//4.00E-34//O-glucosyltransferase 3 [Vitis labrusca]	Unigene108114_All//2.00E-28//AT1G05560| UGT75B1 (UDP-GLUCOSYLTRANSFERASE 75B1); UDP-glucose:4-aminobenzoate acylglucosyltransferase/ UDP-glucosyltransferase/ UDP-glycosyltransferase/ abscisic acid glucosyltransferase/ transferase, transferring glycosyl groups	Unigene108114_All//9.00E-131//gi|109838326|gb|DW236887.1|DW236887		ko00940|Phenylpropanoid biosynthesis//ko00380|Tryptophan metabolism//ko00908|Zeatin biosynthesis//ko00966|Glucosinolate biosynthesis//ko00942|Anthocyanin biosynthesis		nr -
Unigene10812_All	332	0	6.7152	4.491	0	0	0	0	0	0	12.7132	1.0934e-12	Up	12.1328	3.2232e-08	Up	null	null		null	null		null	null		null	null		Unigene10812_All//gi|297600424|ref|NP_001049175.2|//2.00E-14//Os03g0182700 [Oryza sativa Japonica Group] >gi|23396617|sp|Q94HF1.1|EIF3K_ORYSJ RecName: Full=Eukaryotic translation initiation factor 3 subunit K; Short=eIF3k; AltName: Full=eIF-3 p25 >gi|15217293|gb|AAK92637.1|AC079633_17 Unknown protein [Oryza sativa Japonica Group] >gi|108706532|gb|ABF94327.1| Eukaryotic translation initiation fact…	Unigene10812_All//1.00E-10//AT4G33250| EIF3K (EUKARYOTIC TRANSLATION INITIATION FACTOR 3K); translation initiation factor					nr +
Unigene108122_All	397	0	0	0	0	0	0	1.278	0.4211	0	null	null		null	null		null	null		null	null		-1.6017	0.10685		-10.3197	0.00055577	Down	Unigene108122_All//gi|225685853|dbj|BAH30213.1|//2.00E-30//methionine S-adenosyl transferase [Cylindrotheca closterium]	Unigene108122_All//4.00E-29//AT2G36880| MAT3 (methionine adenosyltransferase 3); copper ion binding / methionine adenosyltransferase	Unigene108122_All//5.00E-07//ES821717		ko00270|Cysteine and methionine metabolism//ko00450|Selenoamino acid metabolism		nr -
Unigene108123_All	405	1.0335	0	0.263	0.492	0.3401	1.5612	3.4451	0.1032	0.1967	-10.0133	0.010518		-1.9744	0.15125		-0.5327	0.74937		1.6659	0.097974		-5.061	1.1001e-08	Down	-4.1305	3.697e-08	Down	Unigene108123_All//gi|224101205|ref|XP_002312184.1|//1.00E-42//chromatin remodeling complex subunit [Populus trichocarpa] >gi|222852004|gb|EEE89551.1| chromatin remodeling complex subunit [Populus trichocarpa]	Unigene108123_All//6.00E-35//AT3G42670| CHR38 (CHROMATIN REMODELING 38); ATP binding / DNA binding / helicase/ nucleic acid binding					nr +
Unigene108131_All	949	0	0	0	0	0	0	2.7622	0.1762	0.1679	null	null		null	null		null	null		null	null		-3.9705	6.6864e-14	Down	-4.0401	1.3123e-14	Down	Unigene108131_All//gi|301121570|ref|XP_002908512.1|//1.00E-39//40S ribosomal protein SA [Phytophthora infestans T30-4] >gi|262103543|gb|EEY61595.1| 40S ribosomal protein SA [Phytophthora infestans T30-4]	Unigene108131_All//6.00E-32//AT1G72370| P40; structural constituent of ribosome	Unigene108131_All//3.00E-07//gi|109823896|gb|DW008744.1|DW008744		ko03010|Ribosome		nr -
Unigene108132_All	368	0	0	0	0	0	0	3.1021	0	0.433	null	null		null	null		null	null		null	null		-11.599	3.8865e-08	Down	-2.8408	3.5982e-05	Down	Unigene108132_All//gi|300266605|gb|EFJ50792.1|//5.00E-34//component of cytosolic 80S ribosome and 60S large subunit [Volvox carteri f. nagariensis]	Unigene108132_All//9.00E-34//AT1G77940| 60S ribosomal protein L30 (RPL30B)			ko03010|Ribosome		nr +
Unigene108136_All	224	0	0	0	0	0	0	2.4538	0.5598	0	null	null		null	null		null	null		null	null		-2.132	0.033166		-11.2608	0.00028113	Down	Unigene108136_All//gi|74272607|gb|ABA01099.1|//9.00E-18//40S ribosomal protein S3 [Chlamydomonas incerta]	Unigene108136_All//3.00E-10//AT2G31610| 40S ribosomal protein S3 (RPS3A)			ko03010|Ribosome		nr -
Unigene108137_All	257	0	0	0	0	0	0	1.9742	0.4879	0	null	null		null	null		null	null		null	null		-2.0166	0.052101		-10.9471	0.00055575	Down	Unigene108137_All//gi|116061096|emb|CAL56484.1|//4.00E-31//GTP-binding regulatory protein beta chain homolog-Ch (ISS) [Ostreococcus tauri]	Unigene108137_All//2.00E-28//AT1G48630| RACK1B_AT (RECEPTOR FOR ACTIVATED C KINASE 1 B); nucleotide binding					nr +
Unigene10814_All	216	0	5.1608	1.9722	0	0	0	0	0	0	12.3334	1.9993e-06	Up	10.9456	0.013849		null	null		null	null		null	null		null	null		Unigene10814_All//gi|225469312|ref|XP_002267662.1|//6.00E-06//PREDICTED: similar to L-idonate dehydrogenase [Vitis vinifera]	Unigene10814_All//4.00E-07//AT5G51970| sorbitol dehydrogenase, putative / L-iditol 2-dehydrogenase, putative			ko00051|Fructose and mannose metabolism	GO:0008152//GO:0016491//GO:0046914	nr -
Unigene108140_All	569	0	0	0	0	0	0	1.8577	0.0735	0	null	null		null	null		null	null		null	null		-4.6596	1.9417e-06	Down	-10.8593	6.7258e-08	Down	Unigene108140_All//gi|189081811|sp|A8CEP3.1|CALM_SACJA//7.00E-44//RecName: Full=Calmodulin; Short=CaM >gi|157888809|dbj|BAF80878.1| calmodulin [Saccharina japonica] >gi|298713212|emb|CBJ33511.1| Calcium-binding protein [Ectocarpus siliculosus]	Unigene108140_All//2.00E-43//AT2G27030| CAM5 (CALMODULIN 5); calcium ion binding	Unigene108140_All//3.00E-15//CD485888		ko04626|Plant-pathogen interaction//ko04070|Phosphatidylinositol signaling system		nr -
Unigene108142_All	419	0	0	0	0	0	0	1.9172	0.1995	0.7606	null	null		null	null		null	null		null	null		-3.2645	0.00044857	Down	-1.3338	0.054023				Unigene108142_All//6.00E-28//gi|48805733|gb|CO107047.1|CO107047
Unigene10815_All	330	1.5855	11.5158	4.6795	1.9624	4.3827	5.2006	5.1249	6.8393	12.7967	2.8606	2.7555e-12	Up	1.5614	0.0076031		1.1592	0.039654		1.4061	0.0068522		0.4163	0.30047		1.3202	9.7556e-07	Up	Unigene10815_All//gi|297792833|ref|XP_002864301.1|//4.00E-09//homogentisate 1,2-dioxygenase [Arabidopsis lyrata subsp. lyrata] >gi|297310136|gb|EFH40560.1| homogentisate 1,2-dioxygenase [Arabidopsis lyrata subsp. lyrata]	Unigene10815_All//2.00E-10//AT5G54080| HGO (HOMOGENTISATE 1,2-DIOXYGENASE); homogentisate 1,2-dioxygenase	Unigene10815_All//5.00E-59//TC155472		ko00350|Tyrosine metabolism		nr +
Unigene108164_All	540	0	0	0	0	0	0	6.8901	16.5635	1.1804	null	null		null	null		null	null		null	null		1.2654	3.2693e-12	Up	-2.5452	1.3652e-13	Down	Unigene108164_All//gi|238014838|gb|ACR38454.1|//6.00E-15//unknown [Zea mays]		Unigene108164_All//6.00E-38//TC146753				nr -
Unigene10817_All	323	1.9438	0.6275	16.6509	3.0845	0.2132	0	0.2618	0	0	-1.6312	0.092337		3.0986	6.2485e-18	Up	-3.8548	1.6066e-05	Down	-11.5908	2.9723e-06	Down	-8.0323	0.40659		-8.0323	0.36085		Unigene10817_All//gi|5814093|gb|AAD52097.1|AF088885_1//3.00E-19//receptor-like kinase CHRK1 [Nicotiana tabacum]	Unigene10817_All//1.00E-15//AT4G19810| glycosyl hydrolase family 18 protein				GO:0004553//GO:0004672//GO:0006026//GO:0006464//GO:0030312//GO:0032559//GO:0043167	nr -
Unigene108171_All	514	0	0	0	0	0	0	3.0435	1.7889	0.465	null	null		null	null		null	null		null	null		-0.7667	0.10737		-2.7104	1.5682e-06	Down	Unigene108171_All//gi|171452356|dbj|BAG15869.1|//2.00E-33//ankyrin repeat protein [Bruguiera gymnorhiza]	Unigene108171_All//2.00E-22//AT1G14480| protein binding					nr -
Unigene108186_All	275	0	0	0	0.1811	0	0	2.4599	0	0.1449	null	null		null	null		-7.5006	0.56316		-7.5006	0.64459		-11.2644	6.3449e-05	Down	-4.0855	0.00031027	Down			Unigene108186_All//3.00E-07//TC175182
Unigene108195_All	309	218.765	91.3362	151.133	158.47	229.234	100.704	0.1368	0.2705	0.2579	-1.2601	6.1774e-71	Down	-0.5336	3.1301e-16		0.5326	1.2868e-20		-0.6541	7.2129e-19		0.9836	0.73272		0.9147	0.75117		Unigene108195_All//gi|6959488|gb|AAF33112.1|AF181683_1//4.00E-38//RPT2 [Arabidopsis thaliana]	Unigene108195_All//2.00E-39//AT2G30520| RPT2 (ROOT PHOTOTROPISM 2); protein binding	Unigene108195_All//2.00E-95//EX168571				nr -
Unigene1082_All	466	4.042	0.9786	3.1996	4.4897	6.7984	4.9428	2.0868	1.9732	1.2824	-2.0463	0.0001171	Down	-0.3372	0.50442		0.5986	0.089075		0.1387	0.75558		-0.0808	0.90646		-0.7024	0.2429		Unigene1082_All//gi|5733885|gb|AAD49773.1|AC007932_21//1.00E-25//ESTs gb|T22141 and gb|H37217 come from this gene [Arabidopsis thaliana]	Unigene1082_All//6.00E-12//AT3G17430| phosphate translocator-related	Unigene1082_All//1.00E-152//TC140046			GO:0031224//GO:0031410	nr -
Unigene10820_All	328	6.0616	10.8136	4.5457	9.8717	8.6088	8.6747	11.6013	7.5181	5.4657	0.8351	0.010799		-0.4152	0.39265		-0.1975	0.60289		-0.1865	0.61973		-0.6258	0.02587		-1.0858	8.4564e-05	Down			Unigene10820_All//7.00E-55//gi|109828667|gb|DW227288.1|DW227288
Unigene108208_All	495	0	0	0	0	0	0	4.0145	0.2533	0.8048	null	null		null	null		null	null		null	null		-3.9863	1.0896e-10	Down	-2.3185	6.4036e-07	Down	Unigene108208_All//gi|224000567|ref|XP_002289956.1|//3.00E-60//ubiquitin-conjugating enzyme e2-16kda, ubiquitin protein ligase [Thalassiosira pseudonana CCMP1335] >gi|220975164|gb|EED93493.1| ubiquitin-conjugating enzyme e2-16kda, ubiquitin protein ligase [Thalassiosira pseudonana CCMP1335]	Unigene108208_All//2.00E-46//AT5G56150| UBC30 (ubiquitin-conjugating enzyme 30); ubiquitin-protein ligase			ko04141|Protein processing in endoplasmic reticulum//ko04120|Ubiquitin mediated proteolysis		nr -
Unigene10821_All	386	0	5.5133	0.8277	2.1939	2.7655	1.17	3.067	5.5222	4.1284	12.4287	4.102e-12	Up	9.693	0.045366		0.334	0.64243		-0.907	0.24681		0.8484	0.031395		0.4288	0.35303		Unigene10821_All//gi|297832174|ref|XP_002883969.1|//8.00E-18//myo-inositol oxygenase 2 [Arabidopsis lyrata subsp. lyrata] >gi|297329809|gb|EFH60228.1| myo-inositol oxygenase 2 [Arabidopsis lyrata subsp. lyrata]	Unigene10821_All//6.00E-17//AT5G56640| MIOX5; inositol oxygenase/ iron ion binding	Unigene10821_All//6.00E-99//ES827071		ko00562|Inositol phosphate metabolism//ko00053|Ascorbate and aldarate metabolism	GO:0006020//GO:0016701//GO:0044424//GO:0046914	nr -
Unigene108212_All	340	0	0	0	0	0	0	2.2384	0	0	null	null		null	null		null	null		null	null		-11.1283	1.6767e-05	Down	-11.1283	8.8869e-06	Down	Unigene108212_All//gi|224008993|ref|XP_002293455.1|//6.00E-22//vacuolar proton pump alpha subunit [Thalassiosira pseudonana CCMP1335] >gi|220970855|gb|EED89191.1| vacuolar proton pump alpha subunit [Thalassiosira pseudonana CCMP1335]	Unigene108212_All//1.00E-13//AT1G78900| VHA-A (VACUOLAR ATP SYNTHASE SUBUNIT A); ATP binding / hydrogen ion transporting ATP synthase, rotational mechanism / hydrolase, acting on acid anhydrides, catalyzing transmembrane movement of substances / proton-transporting ATPase, rotational mechanism			ko00190|Oxidative phosphorylation//ko04145|Phagosome		nr +
Unigene108214_All	403	2.4667	0.5029	0	2.843	2.8198	1.1207	4.5113	1.5557	0.9886	-2.2942	0.0040494		-11.2684	1.7695e-05	Down	-0.0118	0.9643		-1.343	0.040079		-1.536	0.00068362	Down	-2.1901	5.0079e-06	Down	Unigene108214_All//gi|195626560|gb|ACG35110.1|//6.00E-17//cytochrome c oxidase copper chaperone [Zea mays]	Unigene108214_All//7.00E-18//AT3G15352| ATCOX17; copper chaperone	Unigene108214_All//0.00E+00//gi|84167290|gb|DR455938.1|DR455938		ko00190|Oxidative phosphorylation		nr -
Unigene108229_All	491	0	0	0	0	0	0	1.6361	0.1702	0.1623	null	null		null	null		null	null		null	null		-3.265	0.00044855	Down	-3.3335	0.0002468	Down	Unigene108229_All//gi|29539334|dbj|BAC67668.1|//8.00E-50//elongation factor-2 [Cyanidioschyzon merolae]	Unigene108229_All//3.00E-41//AT1G56070| LOS1; copper ion binding / translation elongation factor/ translation factor, nucleic acid binding					nr -
Unigene10823_All	482	0	7.9894	5.9658	0	0	0	0	0	0	12.9639	6.3242e-22	Up	12.5425	6.9636e-16	Up	null	null		null	null		null	null		null	null		Unigene10823_All//gi|156554296|ref|XP_001602465.1|//4.00E-67//PREDICTED: similar to S14e ribosomal protein [Nasonia vitripennis]	Unigene10823_All//1.00E-58//AT2G36160| 40S ribosomal protein S14 (RPS14A)	Unigene10823_All//7.00E-19//TC154908		ko03010|Ribosome	GO:0003723//GO:0005198//GO:0009536//GO:0010467//GO:0030529	nr -
Unigene108237_All	576	0	0	0	0.5189	0.1794	0	2.7159	0.1451	0.1383	null	null		null	null		-1.5323	0.29832		-9.0193	0.040077		-4.2263	7.783e-09	Down	-4.2956	2.7095e-09	Down	Unigene108237_All//gi|25991350|gb|AAN76811.1|AF453448_1//3.00E-23//PEP carboxylase kinase [Solanum tuberosum] >gi|33329260|gb|AAQ10030.1| PEPC kinase 1a [Solanum tuberosum]	Unigene108237_All//4.00E-23//AT1G08650| PPCK1 (PHOSPHOENOLPYRUVATE CARBOXYLASE KINASE); kinase/ protein serine/threonine kinase	Unigene108237_All//1.00E-42//TC132996		ko04626|Plant-pathogen interaction		nr -
Unigene108242_All	241	0	0	0	0	0	0	2.9824	0.3469	0.3306	null	null		null	null		null	null		null	null		-3.1039	0.0013964		-3.1733	0.00080946	Down	Unigene108242_All//gi|297728401|ref|NP_001176564.1|//6.00E-16//Os11g0521000 [Oryza sativa Japonica Group] >gi|77551166|gb|ABA93963.1| GDSL-like Lipase/Acylhydrolase family protein, expressed [Oryza sativa (japonica cultivar-group)] >gi|255680130|dbj|BAH95292.1| Os11g0521000 [Oryza sativa Japonica Group]	Unigene108242_All//2.00E-16//AT5G03980| GDSL-motif lipase/hydrolase family protein					nr -
Unigene108247_All	299	0	0.1695	0.5343	0	0	0.151	0.4242	0	3.0645	7.4051	0.62136		9.0615	0.23973		null	null		7.2384	0.70252		-8.7286	0.23644		2.8528	0.00031794	Up	Unigene108247_All//gi|18405138|ref|NP_565911.1|//2.00E-15//aspartyl protease family protein [Arabidopsis thaliana] >gi|20196976|gb|AAB87120.2| expressed protein [Arabidopsis thaliana] >gi|20197046|gb|AAM14894.1| expressed protein [Arabidopsis thaliana]	Unigene108247_All//1.00E-16//AT2G39710| aspartyl protease family protein					nr +
Unigene10825_All	416	0	7.3081	8.0643	0	0.1656	0	0	0	0	12.8353	2.6744e-17	Up	12.9773	1.4712e-18	Up	7.3716	0.61514		null	null		null	null		null	null		Unigene10825_All//sp|P35749|MYH11_HUMAN//6.00E-29//Myosin-11 OS=Homo sapiens GN=MYH11 PE=1 SV=3						swissprot +
Unigene108255_All	309	0	0	0	0	0	0	6.5678	0.4058	0.2579	null	null		null	null		null	null		null	null		-4.0166	5.8254e-11	Down	-4.6705	1.828e-12	Down	Unigene108255_All//gi|6012952|emb|CAB57309.1|//9.00E-15//60S ribosomal protein L6 (YL 16 like) [Cyanophora paradoxa]				ko03010|Ribosome		nr -
Unigene108256_All	248	0.6329	1.8388	0.2147	1.6069	0.6943	0.5463	9.8881	4.3818	3.0522	1.5387	0.19622		-1.5597	0.53399		-1.2106	0.3141		-1.5565	0.23127		-1.1742	0.0013965		-1.6958	7.6624e-06	Down	Unigene108256_All//gi|297810879|ref|XP_002873323.1|//5.00E-06//predicted protein [Arabidopsis lyrata subsp. lyrata] >gi|297319160|gb|EFH49582.1| predicted protein [Arabidopsis lyrata subsp. lyrata]		Unigene108256_All//1.00E-31//ES819093				nr +
Unigene108258_All	599	0	0	0	0	0	0	2.9646	2.791	0	null	null		null	null		null	null		null	null		-0.0871	0.84963		-11.5336	4.1202e-13	Down	Unigene108258_All//gi|115484761|ref|NP_001067524.1|//2.00E-54//Os11g0220800 [Oryza sativa Japonica Group] >gi|122240410|sp|Q0ITS8.1|RL101_ORYSJ RecName: Full=60S ribosomal protein L10-1; AltName: Full=Putative tumor suppressor SC34; AltName: Full=Protein QM >gi|158513712|sp|A2ZCQ7.2|RL101_ORYSI RecName: Full=60S ribosomal protein L10-1; AltName: Full=Putative tumor suppressor SC34; AltName: Full=…	Unigene108258_All//1.00E-53//AT1G66580| 60S ribosomal protein L10 (RPL10C)	Unigene108258_All//3.00E-15//CD485839		ko03010|Ribosome		nr -
Unigene10826_All	452	1.8521	0.2242	0	2.645	2.1332	0.7994	1.4966	0.7397	0.617	-3.0463	0.002113		-10.8549	0.00011899	Down	-0.3102	0.60744		-1.7263	0.0085206		-1.0167	0.20442		-1.2783	0.094883		Unigene10826_All//gi|224054508|ref|XP_002298295.1|//2.00E-13//predicted protein [Populus trichocarpa] >gi|222845553|gb|EEE83100.1| predicted protein [Populus trichocarpa]		Unigene10826_All//1.00E-16//ES852406				nr -
Unigene108265_All	246	0	0	0	0	0	0	2.0624	0	0	null	null		null	null		null	null		null	null		-11.0101	0.0008906	Down	-11.0101	0.00055573	Down		Unigene108265_All//5.00E-07//AT1G48590| C2 domain-containing protein					ESTscan +
Unigene10827_All	920	0	0	0	0	0	0	4.6876	0.9995	0.6928	null	null		null	null		null	null		null	null		-2.2296	5.0865e-13	Down	-2.7583	5.2384e-17	Down	Unigene10827_All//sp|P28770|EPD1_ONCMY//1.00E-21//Ependymin-1 OS=Oncorhynchus mykiss GN=epd1 PE=1 SV=1						swissprot +
Unigene108272_All	250	0	0	0	0	0	0	1.5221	6.0186	22.9471	null	null		null	null		null	null		null	null		1.9834	0.00020625	Up	3.9142	6.0115e-30	Up
Unigene108274_All	642	0	0	0	0	0	0	2.5026	0.7161	0	null	null		null	null		null	null		null	null		-1.8052	0.00032029	Down	-11.2892	7.0023e-12	Down	Unigene108274_All//gi|159480690|ref|XP_001698415.1|//2.00E-07//basal body protein [Chlamydomonas reinhardtii] >gi|158282155|gb|EDP07908.1| basal body protein [Chlamydomonas reinhardtii]	Unigene108274_All//6.00E-06//AT1G55250| HUB2 (HISTONE MONO-UBIQUITINATION 2); protein binding / zinc ion binding					nr -
Unigene108278_All	395	0	0	0.1348	0.3783	0.0872	0.2287	2.3548	0.4232	0.2017	null	null		7.0747	0.64066		-2.1171	0.38733		-0.7261	0.71663		-2.4762	0.0010747		-3.5453	3.973e-05	Down	Unigene108278_All//gi|38605802|emb|CAE05270.2|//2.00E-06//OSJNBb0014D23.4 [Oryza sativa (japonica cultivar-group)]						nr +
Unigene108279_All	476	0.4397	0.958	1.678	0.4186	0	0	2.4871	1.4049	0.4185	1.1235	0.32802		1.9322	0.034194		-8.7094	0.084744		-8.7094	0.13432		-0.824	0.14227		-2.5712	6.9753e-05	Down	Unigene108279_All//gi|187940732|gb|ACD39467.1|//5.00E-06//BEL30 protein [Solanum palustre]	Unigene108279_All//2.00E-06//AT4G34610| BLH6 (BELL1-LIKE HOMEODOMAIN 6); DNA binding / transcription factor	Unigene108279_All//4.00E-17//gi|164305110|gb|ES808607.1|ES808607	HB			nr -
Unigene108285_All	439	2342.88	1085.53	2076.02	319.31	349.451	224.685	3.2745	1.2377	0.8167	-1.1099	0	Down	-0.1745	1.9612e-29		0.1301	0.0013836		-0.5071	1.1243e-33		-1.4036	0.0061536		-2.0034	0.00017022	Down	Unigene108285_All//gi|5738542|emb|CAB53034.1|//2.00E-42//photosystem I subunit XI precursor [Arabidopsis thaliana]	Unigene108285_All//2.00E-43//AT4G12800| PSAL (photosystem I subunit L)	Unigene108285_All//0.00E+00//TC136126		ko00195|Photosynthesis		nr +
Unigene10829_All	361	0.5797	0.4211	0.1475	1.3799	2.4801	0.5004	1.991	0	0.3311	-0.4611	0.75831		-1.9746	0.38162		0.8458	0.28697		-1.4634	0.19319		-10.9593	3.2676e-05	Down	-2.5882	0.0028138								ESTscan +
Unigene108291_All	381	0	0	0	0	0	0	2.4414	0.5485	0.2091	null	null		null	null		null	null		null	null		-2.1541	0.002946		-3.5454	3.9728e-05	Down	Unigene108291_All//gi|301123509|ref|XP_002909481.1|//1.00E-27//60S ribosomal protein L21-1 [Phytophthora infestans T30-4] >gi|262100243|gb|EEY58295.1| 60S ribosomal protein L21-1 [Phytophthora infestans T30-4]	Unigene108291_All//9.00E-28//AT1G09690| 60S ribosomal protein L21 (RPL21C)			ko03010|Ribosome		nr -
Unigene10830_All	288	0.1817	2.4631	0.7396	0	0.9565	2.5091	0.8808	2.0317	1.1066	3.7608	0.0023622		2.0252	0.36182		9.9016	0.070256		11.293	0.00023097	Up	1.2058	0.17115		0.3292	0.76373
Unigene108301_All	449	0	0	0	0	0	0	5.5557	1.6756	0.7985	null	null		null	null		null	null		null	null		-1.7293	7.8133e-06	Down	-2.7986	2.7152e-10	Down			Unigene108301_All//5.00E-10//TC135460
Unigene10831_All	912	0	0.4445	0.5839	0.2185	0.5664	0	0.6027	1.7415	3.6257	8.796	0.01361		9.1896	0.004047		1.3742	0.22642		-7.7715	0.13431		1.5308	0.0017848		2.5887	3.5107e-12	Up			Unigene10831_All//1.00E-40//TC168132
Unigene108314_All	413	0.8868	0	0	0	0.4169	0.4374	1.3309	0.506	0	-9.7925	0.019691		-9.7925	0.027862		8.7036	0.2275		8.7728	0.19517		-1.3952	0.13453		-10.3782	0.00028112	Down
Unigene108316_All	394	0	0	0	0	0	0	3.4339	0.7426	0.4045	null	null		null	null		null	null		null	null		-2.2092	0.00015827	Down	-3.0856	1.9654e-06	Down	Unigene108316_All//gi|34105768|gb|AAQ62075.1|//5.00E-35//ribosomal protein L3 [Triticum aestivum] >gi|34105770|gb|AAQ62076.1| ribosomal protein L3 [Triticum aestivum] >gi|34105774|gb|AAQ62078.1| ribosomal protein L3 [Triticum aestivum] >gi|118152389|gb|ABK63938.1| ribosomal protein L3-B3 [Triticum aestivum] >gi|118152400|gb|ABK63944.1| ribosomal protein L3-B1 [Triticum aestivum] >gi|146141392|tpg…	Unigene108316_All//2.00E-27//AT1G61580| RPL3B (R-PROTEIN L3 B); structural constituent of ribosome	Unigene108316_All//5.00E-07//gi|78348789|gb|DT569063.1|DT569063		ko03010|Ribosome		nr +
Unigene10832_All	333	0	172.094	102.822	0.2992	0	0.5425	0	0	0	17.3928	0	Up	16.6498	2.7685e-194	Up	-8.225	0.31677		0.8585	0.69607		null	null		null	null
Unigene108325_All	423	0.2474	0.4791	0	0.2355	0.6513	0.1068	2.8986	1.5809	0.1884	0.9535	0.62232		-7.9507	0.39834		1.4676	0.42012		-1.1408	0.67879		-0.8746	0.11275		-3.9435	4.8608e-07	Down			Unigene108325_All//1.00E-50//TC154322
Unigene10833_All	367	2.8513	1.3806	1.8862	3.6648	1.9704	0.4922	0.2304	0	0.2171	-1.0463	0.12042		-0.5961	0.39264		-0.8952	0.10729		-2.8964	4.2917e-05	Down	-7.848	0.40653		-0.0858	0.97344				Unigene10833_All//8.00E-18//ES831804
Unigene108331_All	225	0	0.4504	0.4733	0.2214	0	0.2007	4.8857	2.2291	1.0624	8.8151	0.39026		8.8866	0.4019		-7.7905	0.56309		-0.1416	0.95635		-1.1321	0.055228		-2.2012	0.00056564	Down			Unigene108331_All//2.00E-14//CO123936
Unigene108332_All	765	0.6839	0.5961	0.1392	0.7163	0.4051	0.1771	2.3213	0.4917	0.5208	-0.1982	0.82011		-2.2966	0.06768		-0.8223	0.39618		-2.016	0.070559		-2.2391	8.4401e-06	Down	-2.1561	8.2989e-06	Down			Unigene108332_All//1.00E-92//TC165404
Unigene108333_All	1798	0	0	0	0.0554	0	0	4.4679	0.5114	0.1773	null	null		null	null		-5.7918	0.31676		-5.7918	0.40514		-3.1271	5.006e-34	Down	-4.6553	8.8849e-48	Down	Unigene108333_All//gi|18147592|dbj|BAB83086.1|//0.00E+00//cycloartenol synthase [Betula platyphylla]	Unigene108333_All//0.00E+00//AT2G07050| CAS1 (cycloartenol synthase 1); cycloartenol synthase	Unigene108333_All//2.00E-25//CB350491		ko00100|Steroid biosynthesis		nr -
Unigene10834_All	763	0.8229	0	0.0698	0.1306	0.2708	0.1184	0.1108	5.916	3.2372	-9.6846	0.00079205	Down	-3.5594	0.0083218		1.0521	0.61282		-0.1415	0.95272		5.7386	1.2448e-28	Up	4.8687	5.0044e-15	Up	Unigene10834_All//gi|75326590|sp|Q76CU2.1|PDR1_TOBAC//1.00E-102//RecName: Full=Pleiotropic drug resistance protein 1; AltName: Full=NtPDR1 >gi|41052472|dbj|BAD07483.1| PDR-type ABC transporter 1 [Nicotiana tabacum]	Unigene10834_All//1.00E-101//AT1G15520| PDR12 (PLEIOTROPIC DRUG RESISTANCE 12); ATPase, coupled to transmembrane movement of substances	Unigene10834_All//0.00E+00//TC147767		ko03040|Spliceosome//ko02010|ABC transporters		nr -
Unigene108340_All	312	0	0	0	0	0	0	2.9813	0	0	null	null		null	null		null	null		null	null		-11.5417	1.1457e-06	Down	-11.5417	5.4814e-07	Down	Unigene108340_All//sp|Q58A42|DD3_DICDI//1.00E-16//Protein DD3-3 OS=Dictyostelium discoideum GN=DD3-3 PE=2 SV=1						swissprot -
Unigene108341_All	1039	0	0	0	0	0	0	6.3074	0.0805	0	null	null		null	null		null	null		null	null		-6.2919	5.4918e-43	Down	-12.6228	3.2605e-48	Down	Unigene108341_All//gi|19698452|gb|AAL93154.1|AF485268_1//1.00E-137//bacterial-induced class III peroxidase [Gossypium hirsutum]	Unigene108341_All//1.00E-102//AT2G41480| electron carrier/ heme binding / peroxidase	Unigene108341_All//6.00E-135//TC147787		ko00940|Phenylpropanoid biosynthesis//ko00360|Phenylalanine metabolism		nr +
Unigene108350_All	935	0	0	0	0	0	0	2.5775	0.5811	1.0226	null	null		null	null		null	null		null	null		-2.1491	2.7837e-07	Down	-1.3337	0.00026489	Down	Unigene108350_All//gi|297806151|ref|XP_002870959.1|//1.00E-95//amino acid transporter family protein [Arabidopsis lyrata subsp. lyrata] >gi|297316796|gb|EFH47218.1| amino acid transporter family protein [Arabidopsis lyrata subsp. lyrata]	Unigene108350_All//9.00E-87//AT5G02180| amino acid transporter family protein					nr +
Unigene108355_All	420	0	0	0	0	0	0	3.2213	0.7961	0.664	null	null		null	null		null	null		null	null		-2.0166	0.00040092	Down	-2.2784	7.1318e-05	Down
Unigene108360_All	355	0	0	0	0.2806	0	0.1272	2.382	0.2355	1.01	null	null		null	null		-8.1324	0.31675		-1.1414	0.67877		-3.3384	0.0002515	Down	-1.2378	0.062639
Unigene108363_All	320	0	0	0	0	0	0	13.8732	37.3549	1.3695	null	null		null	null		null	null		null	null		1.429	3.5965e-19	Up	-3.3406	5.7635e-21	Down			Unigene108363_All//2.00E-08//ES810763
Unigene108369_All	466	0	0	0	0	0	0	1.6331	0.1794	13.3365	null	null		null	null		null	null		null	null		-3.1864	0.00079297	Down	3.0297	4.2208e-26	Up
Unigene10837_All	368	0.1422	0	0	4.6024	0.3743	3.3136	0	0	0	-7.1518	0.61928		-7.1518	0.632		-3.6201	1.0249e-08	Down	-0.474	0.38557		null	null		null	null		Unigene10837_All//gi|115477821|ref|NP_001062506.1|//3.00E-20//Os08g0560000 [Oryza sativa Japonica Group] >gi|113624475|dbj|BAF24420.1| Os08g0560000 [Oryza sativa Japonica Group]	Unigene10837_All//1.00E-20//AT2G36690| oxidoreductase, 2OG-Fe(II) oxygenase family protein			ko00270|Cysteine and methionine metabolism//ko00941|Flavonoid biosynthesis	GO:0008152//GO:0016706	nr +
Unigene108376_All	529	0	0	0	0	0	0	2.7974	1.5012	0	null	null		null	null		null	null		null	null		-0.898	0.067429		-11.4499	5.8525e-11	Down	Unigene108376_All//gi|2500261|sp|P93099.1|RL13A_CYAPA//7.00E-41//RecName: Full=60S ribosomal protein L13a >gi|1743007|emb|CAA71090.1| ribosomal protein L13a [Cyanophora paradoxa]	Unigene108376_All//3.00E-37//AT4G13170| 60S ribosomal protein L13A (RPL13aC)			ko03010|Ribosome		nr +
Unigene108380_All	496	0	0	0	0	0	0	1.6196	0.1685	0.4016	null	null		null	null		null	null		null	null		-3.2648	0.00044853	Down	-2.0118	0.0071133		Unigene108380_All//gi|15242647|ref|NP_198848.1|//1.00E-09//DC1 domain-containing protein [Arabidopsis thaliana] >gi|10178142|dbj|BAB11587.1| CHP-rich zinc finger protein-like [Arabidopsis thaliana]	Unigene108380_All//6.00E-11//AT5G40320| DC1 domain-containing protein	Unigene108380_All//3.00E-101//CO075261				nr +
Unigene108381_All	589	0	0	0	0	0	0	4.8812	0.2838	0.2706	null	null		null	null		null	null		null	null		-4.1043	1.5322e-15	Down	-4.173	2.582e-16	Down	Unigene108381_All//gi|157503121|gb|ABV58643.1|//2.00E-37//ubquitin [Catharanthus roseus]	Unigene108381_All//2.00E-24//AT1G65350| UBQ13; protein binding	Unigene108381_All//2.00E-25//TC164984		ko03010|Ribosome		nr +
Unigene108383_All	379	0	0	0	0.1314	0	0.3575	2.5658	0.2206	0	null	null		null	null		-7.0378	0.56306		1.444	0.6394		-3.5399	4.3192e-05	Down	-11.3252	2.7244e-07	Down
Unigene108386_All	391	0	0	0	0.2548	0.1761	0.1155	1.622	0.3207	0	null	null		null	null		-0.533	0.81892		-1.1415	0.67876		-2.3385	0.012734		-10.6636	7.1236e-05	Down	Unigene108386_All//gi|15233062|ref|NP_191681.1|//1.00E-24//short-chain dehydrogenase/reductase (SDR) family protein [Arabidopsis thaliana] >gi|75311801|sp|Q9M2E2.1|SDR1_ARATH RecName: Full=(+)-neomenthol dehydrogenase; AltName: Full=Menthone:neomenthol reductase; AltName: Full=Short-chain dehydrogenase/reductase 1; Short=AtSDR1	Unigene108386_All//1.00E-25//AT3G61220| short-chain dehydrogenase/reductase (SDR) family protein	Unigene108386_All//4.00E-174//ES839198				nr +
Unigene10839_All	259	0	11.7381	2.8784	0	0	0	0	0	0	13.5189	2.674e-17	Up	11.4911	0.00032785	Up	null	null		null	null		null	null		null	null								ESTscan -
Unigene108393_All	875	0.0598	0	0	0	0.0787	0	9.9056	1.5763	0.1366	-5.9021	0.61927		-5.9021	0.63198		6.2983	0.61507		null	null		-2.6517	5.138e-31	Down	-6.1802	1.5787e-58	Down
Unigene108396_All	368	0	0	0	0	0	0	1.4936	1.3629	0	null	null		null	null		null	null		null	null		-0.1321	0.87988		-10.5446	0.00028111	Down
Unigene108397_All	321	0	0	0	0	0	0	2.5026	0.651	0	null	null		null	null		null	null		null	null		-1.9427	0.011711		-11.2892	4.4326e-06	Down							ESTscan +
Unigene108398_All	275	8.1811	2.7638	4.8409	17.2085	14.7759	19.0507	7.6873	3.4956	8.6921	-1.5656	0.00051858	Down	-0.757	0.090552		-0.2199	0.47772		0.1467	0.62156		-1.1369	0.0044205		0.1772	0.64632
Unigene10841_All	434	0.7233	0.2335	0	1.7217	1.8249	1.0406	5.7478	0.6741	0.6426	-1.6312	0.27663		-9.4985	0.049294		0.084	0.94453		-0.7264	0.39022		-3.092	7.0903e-11	Down	-3.161	1.6203e-11	Down	Unigene10841_All//gi|46359653|dbj|BAD15331.1|//3.00E-42//cytochrome P450 [Panax ginseng]	Unigene10841_All//1.00E-31//AT2G45570| CYP76C2; electron carrier/ heme binding / iron ion binding / monooxygenase/ oxygen binding	Unigene10841_All//0.00E+00//TC135966		ko00940|Phenylpropanoid biosynthesis//ko00945|Stilbenoid, diarylheptanoid and gingerol biosynthesis//ko00903|Limonene and pinene degradation//ko00941|Flavonoid biosynthesis//ko00944|Flavone and flavonol biosynthesis	GO:0003676//GO:0005506//GO:0006259//GO:0016709	nr -
Unigene108423_All	523	0	0	0	0	0	0	1.8594	1.3586	0	null	null		null	null		null	null		null	null		-0.4527	0.48985		-10.8606	2.7242e-07	Down	Unigene108423_All//gi|301095349|ref|XP_002896775.1|//6.00E-26//60S acidic ribosomal protein P0 [Phytophthora infestans T30-4] >gi|262108658|gb|EEY66710.1| 60S acidic ribosomal protein P0 [Phytophthora infestans T30-4]	Unigene108423_All//2.00E-23//AT2G40010| 60S acidic ribosomal protein P0 (RPP0A)			ko03010|Ribosome		nr +
Unigene10843_All	285	0	0	0	0	0	0	1.7802	1.7598	0	null	null		null	null		null	null		null	null		-0.0166	1.0219		-10.7978	0.00055571	Down					ko00910|Nitrogen metabolism		kegg -
Unigene10844_All	360	0.7267	0	0.2958	0	0.1913	0.5018	5.285	1.9737	0.664	-9.5052	0.067227		-1.2967	0.43669		7.5797	0.61504		8.971	0.19516		-1.421	0.0010934		-2.9926	1.5708e-08	Down
[truncated: 35,912 more rows]
